# Supplementary material for: Peroxiredoxin 6 Down-Regulation Induces Metabolic Remodeling and Cell Cycle Arrest in HepG2 Cells
Source: MDPI journal article supplement (doi:10.3390/antiox8110505), 2019-10-23
Supplement: s1 [file Suppl. file 1-v2-1.xlsx]

## Sheet: DATA
Majority protein IDs	Protein names	Gene Names	Unique peptides	NT	NT	NT	NT	siRNA-Prdx6	siRNA-Prdx6	siRNA-Prdx6	siRNA-Prdx6	Fold Change	pvalue
Q9UP83	Conserved oligomeric Golgi complex subunit 5	COG5	1	801610	540010	843430	0	1130700	0	861040	596020	1.1843	0.543646
Q13217	DnaJ homolog subfamily C member 3	DNAJC3	5	3510900	3757300	0	3596500	0	0	2763900	0	0.763178	1
Q9H2M3;Q93088	S-methylmethionine--homocysteine S-methyltransferase BHMT2;Betaine--homocysteine S-methyltransferase 1	BHMT2;BHMT	1	0	0	0	0	0	0	0	0	1	1
Q01995	Transgelin	TAGLN	10	13905000	14981000	27304000	27371000	42028000	40205000	38667000	38571000	1.90844	0.0096222
P51654	Glypican-3;Secreted glypican-3	GPC3	7	15783000	19810000	18603000	16400000	16231000	20833000	16001000	21255000	1.05275	0.635675
Q96A49	Synapse-associated protein 1	SYAP1	1	0	0	0	2260900	2767700	1971500	0	0	1.04808	1
P36404	ADP-ribosylation factor-like protein 2	ARL2	1	1283100	0	0	1094900	1126600	1145800	837830	0	0.871946	0.391227
Q7Z6M1	Rab9 effector protein with kelch motifs	RABEPK	2	0	0	0	0	0	909850	0	929710	1	1
Q96HR9	Receptor expression-enhancing protein 6	REEP6	2	0	0	2447400	4570500	2265300	0	0	0	0.645578	1
Q12846	Syntaxin-4	STX4	1	744070	0	0	0	812930	0	0	905780	1.15494	1
P02771	Alpha-fetoprotein	AFP	18	65102000	45815000	42085000	52051000	53051000	40359000	48707000	45626000	0.915583	0.502108
P08263;P09210	Glutathione S-transferase A1;Glutathione S-transferase A1, N-terminally processed;Glutathione S-transferase A2	GSTA1;GSTA2	20	7362700	2713800	2855900	11164000	9782000	3897600	13454000	5839300	1.36837	0.418674
Q13308	Inactive tyrosine-protein kinase 7	PTK7	17	69016000	71304000	72109000	66299000	62631000	65839000	61070000	68448000	0.925591	0.0496303
Q8N6C5	Immunoglobulin superfamily member 1	IGSF1	9	24771000	11568000	16466000	14841000	17855000	9714800	18338000	8842100	0.809359	0.398033
P12277	Creatine kinase B-type	CKB	17	61410000	76024000	91790000	86502000	67080000	77844000	67925000	63799000	0.876228	0.257571
P50416	Carnitine O-palmitoyltransferase 1, liver isoform	CPT1A	10	12328000	14113000	10253000	9381000	11259000	8641700	10733000	10548000	0.893797	0.373312
P10644	cAMP-dependent protein kinase type I-alpha regulatory subunit;cAMP-dependent protein kinase type I-alpha regulatory subunit, N-terminally processed	PRKAR1A	11	11349000	11799000	13086000	14884000	9045000	9194100	14016000	11108000	0.848294	0.191272
P14618	Pyruvate kinase PKM	PKM	59	2626900000	3129700000	3520100000	2930100000	2415700000	3003100000	2358900000	2659000000	0.854991	0.107327
P30042	ES1 protein homolog, mitochondrial	C21orf33	8	24717000	27836000	31107000	40706000	38274000	30170000	37066000	20913000	1.01654	0.970439
O15460	Prolyl 4-hydroxylase subunit alpha-2	P4HA2	12	23179000	22881000	28590000	20025000	17370000	25227000	14678000	17570000	0.790547	0.118486
Q6NVY1	3-hydroxyisobutyryl-CoA hydrolase, mitochondrial	HIBCH	12	36478000	37917000	29346000	34535000	31606000	33379000	47287000	39792000	1.09971	0.448672
Q16658	Fascin	FSCN1	22	81912000	80285000	96702000	97215000	72135000	106630000	68625000	101330000	0.979237	0.781521
P35558	Phosphoenolpyruvate carboxykinase, cytosolic [GTP]	PCK1	5	0	1376400	0	1700600	0	0	0	0	1	1
P08133	Annexin A6	ANXA6	49	274960000	226610000	223490000	257640000	260920000	230040000	254880000	185710000	0.94795	0.55123
Q9UHJ6	Sedoheptulokinase	SHPK	8	16477000	15053000	13633000	16300000	15723000	17808000	16544000	14378000	1.04865	0.479559
Q02809	Procollagen-lysine,2-oxoglutarate 5-dioxygenase 1	PLOD1	19	43994000	46827000	47732000	44900000	35020000	35519000	32353000	30392000	0.726529	0.000226771
Q8N7H5	RNA polymerase II-associated factor 1 homolog	PAF1	2	4444600	3286300	2403100	2766200	3121500	3358900	3121700	3969400	1.05204	0.631226
Q9NVS9	Pyridoxine-5-phosphate oxidase	PNPO	8	70508000	58017000	66458000	72185000	85280000	66958000	117810000	64729000	1.25306	0.223244
O00469	Procollagen-lysine,2-oxoglutarate 5-dioxygenase 2	PLOD2	15	48562000	50805000	45277000	42913000	42089000	34151000	37485000	47226000	0.858144	0.0939209
P51688	N-sulphoglucosamine sulphohydrolase	SGSH	7	27936000	21340000	18821000	21316000	20837000	18152000	23086000	18684000	0.903213	0.374808
P07339	Cathepsin D;Cathepsin D light chain;Cathepsin D heavy chain	CTSD	19	148970000	160720000	159690000	191540000	160550000	183760000	186520000	190930000	1.09205	0.222066
O00748	Cocaine esterase	CES2	17	63799000	45202000	53342000	57364000	59544000	45358000	67765000	39940000	0.967684	0.750397
Q86TG7	Retrotransposon-derived protein PEG10	PEG10	28	313830000	208560000	236920000	254850000	224690000	165050000	191560000	177350000	0.748058	0.0383531
P30837	Aldehyde dehydrogenase X, mitochondrial	ALDH1B1	23	417200000	392110000	362980000	405880000	433910000	381160000	425310000	384060000	1.02932	0.551288
Q16762	Thiosulfate sulfurtransferase	TST	9	53089000	48892000	37438000	47128000	47204000	39390000	59011000	45155000	1.02258	0.866877
Q6PIU2	Neutral cholesterol ester hydrolase 1	NCEH1	4	21888000	21633000	18729000	23018000	20464000	17184000	21426000	16881000	0.89078	0.165643
Q9Y3Z3	Deoxynucleoside triphosphate triphosphohydrolase SAMHD1	SAMHD1	16	34154000	29392000	31989000	29845000	28468000	29824000	29936000	38847000	1.01352	0.927608
P01024	Complement C3;Complement C3 beta chain;C3-beta-c;Complement C3 alpha chain;C3a anaphylatoxin;Acylation stimulating protein;Complement C3b alpha chain;Complement C3c alpha chain fragment 1;Complement C3dg fragment;Complement C3g fragment;Complement C3d fragment;Complement C3f fragment;Complement C3c alpha chain fragment 2	C3	49	237090000	247200000	267580000	199300000	172990000	185000000	170060000	156590000	0.719787	0.00380411
O94788	Retinal dehydrogenase 2	ALDH1A2	2	3981700	5358100	6757400	4774200	3330800	8820800	5676900	8136900	1.24407	0.519075
Q9NR19	Acetyl-coenzyme A synthetase, cytoplasmic	ACSS2	12	24716000	20520000	18536000	25339000	27120000	16699000	28610000	15377000	0.985355	0.809747
Q00266	S-adenosylmethionine synthase isoform type-1	MAT1A	12	37479000	31790000	26154000	32573000	32910000	31345000	41272000	24578000	1.01648	0.955048
P23141	Liver carboxylesterase 1	CES1	39	549780000	304900000	365850000	548360000	486130000	336440000	501770000	315440000	0.927011	0.744145
Q9P0Z9	Peroxisomal sarcosine oxidase	PIPOX	8	21659000	16201000	12058000	20693000	19757000	11159000	21113000	15285000	0.953308	0.801723
Q9BSH5	Haloacid dehalogenase-like hydrolase domain-containing protein 3	HDHD3	5	10037000	6308900	7490200	7056900	9705600	5462600	10866000	7183500	1.07525	0.782711
Q9NUB1	Acetyl-coenzyme A synthetase 2-like, mitochondrial	ACSS1	3	6772000	4601000	3323000	3744500	4295400	3640600	4692100	4190900	0.912069	0.737099
P09960	Leukotriene A-4 hydrolase	LTA4H	19	83349000	63206000	63045000	60408000	67154000	61095000	68788000	72964000	0.999974	0.939814
Q9Y5M8	Signal recognition particle receptor subunit beta	SRPRB	10	19071000	36295000	30141000	32212000	23683000	25129000	14972000	26206000	0.764448	0.216631
P28838	Cytosol aminopeptidase	LAP3	33	285860000	327610000	309670000	282120000	257510000	308540000	281990000	259340000	0.918789	0.171323
Q9NPH2	Inositol-3-phosphate synthase 1	ISYNA1	11	39413000	26406000	37546000	26513000	30449000	35644000	20835000	31554000	0.912256	0.578542
P04792	Heat shock protein beta-1	HSPB1	7	50612000	68502000	69607000	52877000	69265000	76483000	49334000	65469000	1.07845	0.581903
P11169;Q8TDB8	Solute carrier family 2, facilitated glucose transporter member 3;Solute carrier family 2, facilitated glucose transporter member 14	SLC2A3;SLC2A14	9	144450000	141000000	119590000	108660000	123380000	133530000	132890000	149920000	1.05065	0.520952
Q9BTW9	Tubulin-specific chaperone D	TBCD	5	5319500	4418300	5262200	4716300	4844700	5050500	4026600	4942900	0.956807	0.535299
Q9H0U4;Q92928	Ras-related protein Rab-1B;Putative Ras-related protein Rab-1C	RAB1B;RAB1C	6	37076000	39871000	31622000	44462000	45862000	45643000	42779000	52621000	1.22135	0.0501762
P29474	Nitric oxide synthase, endothelial	NOS3	18	14226000	3386500	36608000	4917400	30409000	5938900	3949800	5415100	0.772987	0.784543
P17174	Aspartate aminotransferase, cytoplasmic	GOT1	32	270460000	286000000	229230000	276770000	249580000	305640000	333360000	327760000	1.14483	0.160501
P33121	Long-chain-fatty-acid--CoA ligase 1	ACSL1	19	36769000	46414000	43113000	33236000	37509000	40872000	48106000	47587000	1.09115	0.38702
P13716	Delta-aminolevulinic acid dehydratase	ALAD	3	6725500	8451900	8086500	6799600	9380000	5786300	8678200	2453800	0.874758	0.456957
Q9GZU2	Paternally-expressed gene 3 protein	PEG3	20	37714000	52027000	59663000	42572000	33614000	34883000	26642000	37306000	0.689904	0.0276788
O15164	Transcription intermediary factor 1-alpha	TRIM24	3	2562200	4326700	2511900	2979200	1911000	2313200	2918700	3806700	0.884459	0.526561
P26373	60S ribosomal protein L13	RPL13	21	164420000	191870000	189750000	215760000	189490000	200800000	178660000	201640000	1.01154	0.819854
Q9BSC4	Nucleolar protein 10	NOL10	3	5147100	3542600	2125600	408770	4839700	2528800	3741600	4206300	1.3646	0.319754
P39687	Acidic leucine-rich nuclear phosphoprotein 32 family member A	ANP32A	13	151150000	143430000	129180000	135050000	146460000	142350000	171530000	135970000	1.06711	0.343071
Q9BY49	Peroxisomal trans-2-enoyl-CoA reductase	PECR	15	49376000	45205000	31444000	46845000	35664000	35009000	50668000	36546000	0.913328	0.538717
P48449	Lanosterol synthase	LSS	13	15393000	6773900	8523000	10133000	11322000	10056000	11366000	10409000	1.05708	0.588262
P19440;A6NGU5	Gamma-glutamyltranspeptidase 1;Gamma-glutamyltranspeptidase 1 heavy chain;Gamma-glutamyltranspeptidase 1 light chain;Putative gamma-glutamyltranspeptidase 3;Putative gamma-glutamyltranspeptidase 3 heavy chain;Putative gamma-glutamyltranspeptidase 3 light chain	GGT1;GGT3P	8	20590000	19654000	21870000	21309000	21629000	20718000	29306000	24119000	1.14803	0.159516
P15586	N-acetylglucosamine-6-sulfatase	GNS	6	10860000	12532000	8597400	7824500	10278000	9639000	8833100	13209000	1.05388	0.68749
P31946	14-3-3 protein beta/alpha;14-3-3 protein beta/alpha, N-terminally processed	YWHAB	14	274880000	267980000	299340000	297050000	283540000	316220000	326840000	272130000	1.05221	0.377164
Q13057	Bifunctional coenzyme A synthase;Phosphopantetheine adenylyltransferase;Dephospho-CoA kinase	COASY	12	23820000	20528000	18218000	22398000	20329000	14327000	19812000	20369000	0.880808	0.248735
Q08380	Galectin-3-binding protein	LGALS3BP	10	68722000	52418000	68277000	57258000	55081000	50721000	63448000	65762000	0.952719	0.619894
P47914	60S ribosomal protein L29	RPL29	8	41410000	118270000	66187000	57897000	33073000	57083000	15236000	91707000	0.694588	0.310769
P62854	40S ribosomal protein S26	RPS26	2	16262000	21851000	26589000	39356000	32588000	16341000	24225000	22138000	0.915759	0.787032
Q03519	Antigen peptide transporter 2	TAP2	2	2082300	4034800	1451400	2838000	2039700	2662700	1943400	2517600	0.880546	0.784905
Q9BQE3	Tubulin alpha-1C chain	TUBA1C	3	209890000	261820000	354440000	242180000	241080000	322780000	177190000	251870000	0.929413	0.659829
P30613	Pyruvate kinase PKLR	PKLR	10	10330000	8271000	7532400	11170000	9850200	7636800	9525100	7652500	0.929261	0.577846
Q9H6R3	Acyl-CoA synthetase short-chain family member 3, mitochondrial	ACSS3	31	163570000	134800000	152180000	142690000	168880000	161030000	148210000	133930000	1.03171	0.664391
Q9BSD7	Cancer-related nucleoside-triphosphatase	NTPCR	2	1524200	1426800	1382600	1509000	1344600	1617500	1322300	1205600	0.93965	0.345975
O43795	Unconventional myosin-Ib	MYO1B	15	23899000	35695000	41255000	30573000	31337000	49782000	41610000	42417000	1.25661	0.171521
P28070	Proteasome subunit beta type-4	PSMB4	6	21085000	20677000	30302000	28557000	29699000	34264000	27591000	35337000	1.26108	0.0817458
Q9BW91	ADP-ribose pyrophosphatase, mitochondrial	NUDT9	4	6638800	5742500	4384600	5484900	5005000	6033600	6404200	5429400	1.02793	0.750734
Q10471	Polypeptide N-acetylgalactosaminyltransferase 2;Polypeptide N-acetylgalactosaminyltransferase 2 soluble form	GALNT2	4	5340700	8890400	8757300	7090200	6548000	8035900	8168800	8757900	1.04761	0.665597
P51857	3-oxo-5-beta-steroid 4-dehydrogenase	AKR1D1	3	118050000	75802000	95483000	94358000	93505000	105780000	109270000	104630000	1.07686	0.414927
P61254	60S ribosomal protein L26	RPL26	4	16117000	28084000	19968000	21750000	17661000	20675000	11449000	26228000	0.884705	0.510972
Q12972	Nuclear inhibitor of protein phosphatase 1;Activator of RNA decay	PPP1R8	4	4873100	4343400	5664800	4175400	4720400	4627200	3966400	4996700	0.960854	0.681729
O00168	Phospholemman	FXYD1	1	1757100	823890	633230	1517700	1083300	547400	2337300	0	1.11808	0.956109
P49321	Nuclear autoantigenic sperm protein	NASP	28	318800000	303150000	301620000	336200000	308490000	223180000	309890000	274790000	0.886154	0.163711
Q8NHP8	Putative phospholipase B-like 2;Putative phospholipase B-like 2 32 kDa form;Putative phospholipase B-like 2 45 kDa form	PLBD2	4	7842000	8205100	7609700	8455100	11527000	10098000	12379000	11488000	1.41667	0.00037635
P45954	Short/branched chain specific acyl-CoA dehydrogenase, mitochondrial	ACADSB	24	170730000	147740000	112680000	194540000	151250000	147530000	177250000	156250000	1.01053	0.829918
P24534	Elongation factor 1-beta	EEF1B2	12	95290000	130170000	141440000	106270000	105420000	122280000	131970000	139570000	1.0551	0.599973
O95232	Luc7-like protein 3	LUC7L3	3	3766300	2521600	2265200	3095300	3073800	3071600	2974400	5015300	1.21348	0.309126
O14579	Coatomer subunit epsilon	COPE	14	55986000	68590000	58499000	56064000	47527000	56554000	62864000	44844000	0.885631	0.214431
Q5SSJ5	Heterochromatin protein 1-binding protein 3	HP1BP3	3	4927200	6458100	0	2510300	7585100	2262200	4910900	2629100	0.938461	0.797802
Q8TD30	Alanine aminotransferase 2	GPT2	29	220100000	185610000	215940000	211210000	194220000	187190000	194760000	202510000	0.934947	0.16771
P07437	Tubulin beta chain	TUBB	7	847510000	822540000	922670000	899040000	924330000	848460000	861900000	702000000	0.95559	0.472362
Q00839	Heterogeneous nuclear ribonucleoprotein U	HNRNPU	57	1021300000	1377700000	1205900000	1145500000	1033500000	1023000000	1049500000	1227700000	0.912281	0.283601
O75891	Cytosolic 10-formyltetrahydrofolate dehydrogenase	ALDH1L1	14	25655000	10788000	13073000	14827000	14796000	12807000	14498000	10055000	0.810593	0.451352
Q96G61;Q8NFP7;Q9NZJ9	Diphosphoinositol polyphosphate phosphohydrolase 3-beta;Diphosphoinositol polyphosphate phosphohydrolase 3-alpha;Diphosphoinositol polyphosphate phosphohydrolase 2	NUDT11;NUDT10;NUDT4	3	3696600	2806100	2947600	3261000	4641600	3846100	4648300	6756400	1.56494	0.0174945
Q96AG4	Leucine-rich repeat-containing protein 59	LRRC59	23	149020000	208350000	197210000	186080000	171480000	179850000	128330000	181520000	0.89269	0.335825
Q9UL12	Sarcosine dehydrogenase, mitochondrial	SARDH	12	33023000	21970000	20765000	22742000	32392000	22593000	27907000	25209000	1.09747	0.464263
P22102	Trifunctional purine biosynthetic protein adenosine-3;Phosphoribosylamine--glycine ligase;Phosphoribosylformylglycinamidine cyclo-ligase;Phosphoribosylglycinamide formyltransferase	GART	28	112730000	141780000	135020000	125450000	114190000	146090000	102330000	113820000	0.925143	0.394455
Q16698	2,4-dienoyl-CoA reductase, mitochondrial	DECR1	13	56124000	62708000	51523000	57994000	62656000	64034000	74767000	64655000	1.16537	0.0368767
Q13526	Peptidyl-prolyl cis-trans isomerase NIMA-interacting 1	PIN1	3	3515600	5372700	3286900	6303400	7417600	3031400	3010600	2196700	0.847267	0.460246
P30043	Flavin reductase (NADPH)	BLVRB	3	7233100	5603800	6960000	7857300	7937000	8314900	8632500	8415900	1.20417	0.0406864
P17844	Probable ATP-dependent RNA helicase DDX5	DDX5	28	112940000	110450000	120090000	94840000	95674000	112890000	84862000	135760000	0.979161	0.780591
P27105	Erythrocyte band 7 integral membrane protein	STOM	12	33555000	39158000	32734000	36962000	37468000	36195000	48191000	40754000	1.14184	0.141992
O95954	Formimidoyltransferase-cyclodeaminase;Glutamate formimidoyltransferase;Formimidoyltetrahydrofolate cyclodeaminase	FTCD	9	19619000	16296000	17160000	16281000	18802000	11839000	13345000	13253000	0.825293	0.110103
Q92979	Ribosomal RNA small subunit methyltransferase NEP1	EMG1	2	3775200	3839600	3776500	3718500	4768500	5408600	6794600	3673500	1.36635	0.0661778
Q86U38	Nucleolar protein 9	NOP9	11	19185000	37187000	30667000	25084000	22531000	52763000	29014000	30620000	1.20339	0.50036
Q9BXS5	AP-1 complex subunit mu-1	AP1M1	7	14613000	16296000	15884000	18142000	11168000	15955000	21825000	15946000	0.999369	0.86619
P49736	DNA replication licensing factor MCM2	MCM2	24	54949000	45723000	48790000	45075000	38454000	38357000	36834000	36072000	0.769607	0.00162986
O00468	Agrin;Agrin N-terminal 110 kDa subunit;Agrin C-terminal 110 kDa subunit;Agrin C-terminal 90 kDa fragment;Agrin C-terminal 22 kDa fragment	AGRN	6	10080000	7143500	8833500	6677800	4757300	4361700	6091000	11682000	0.821511	0.31722
Q96FZ7	Charged multivesicular body protein 6	CHMP6	2	2722200	1574500	0	1443500	1144700	0	2192200	0	0.871982	0.70396
P40939	Trifunctional enzyme subunit alpha, mitochondrial;Long-chain enoyl-CoA hydratase;Long chain 3-hydroxyacyl-CoA dehydrogenase	HADHA	73	826850000	713130000	745290000	805060000	786860000	765400000	752840000	792650000	1.0024	0.917169
Q9Y4C8	Probable RNA-binding protein 19	RBM19	3	0	644900	691200	818760	0	1038700	813660	2115400	1.84131	0.147259
Q8N2K0	Monoacylglycerol lipase ABHD12	ABHD12	4	3677900	2916600	4540600	3752700	3066200	4413400	4866200	2458000	0.994358	0.873583
O75533	Splicing factor 3B subunit 1	SF3B1	44	107430000	127930000	126230000	93364000	103620000	100190000	84175000	122240000	0.901685	0.367417
Q86V81	THO complex subunit 4	ALYREF	9	105350000	186440000	138590000	145000000	111950000	145280000	102540000	122930000	0.838924	0.28226
Q9BX93	Group XIIB secretory phospholipase A2-like protein	PLA2G12B	1	0	2443600	1093000	3249200	3348000	0	2083600	2145300	1.11658	0.640844
P62993	Growth factor receptor-bound protein 2	GRB2	12	25741000	17785000	21023000	30180000	30702000	27546000	32535000	33098000	1.30774	0.0589318
Q6Y1H2	Very-long-chain (3R)-3-hydroxyacyl-CoA dehydratase 2	HACD2	4	6817400	8033900	5554500	4920000	6134100	7059100	3936500	9582800	1.05475	0.922198
Q8N2G8	GH3 domain-containing protein	GHDC	4	1711500	1407700	2985500	1478800	2211000	3073800	1603000	1911900	1.16037	0.475886
P02675	Fibrinogen beta chain;Fibrinopeptide B;Fibrinogen beta chain	FGB	12	14589000	7553800	17657000	13336000	11970000	11950000	12432000	13237000	0.93325	0.89904
Q9BY67	Cell adhesion molecule 1	CADM1	10	48937000	29996000	38857000	44940000	45537000	20495000	35612000	36090000	0.846396	0.380187
P42766	60S ribosomal protein L35	RPL35	9	94905000	127380000	105520000	131930000	83384000	99665000	88666000	130900000	0.875755	0.314479
P61020	Ras-related protein Rab-5B	RAB5B	2	2782500	1677600	1322200	1450900	3193200	2517600	4605900	3669500	1.93361	0.0172621
Q9BRK5	45 kDa calcium-binding protein	SDF4	9	17343000	17217000	17202000	13869000	11781000	13425000	9645500	18796000	0.817411	0.181195
O43776	Asparagine--tRNA ligase, cytoplasmic	NARS	21	82558000	98862000	100140000	87106000	78382000	91991000	75270000	101130000	0.940616	0.467062
P62861	40S ribosomal protein S30	FAU	3	21702000	62808000	29076000	25994000	14617000	33290000	12642000	46852000	0.769458	0.44996
Q96C23	Aldose 1-epimerase	GALM	9	40900000	38509000	33251000	42455000	29956000	37511000	44835000	40941000	0.987932	0.859778
P11233	Ras-related protein Ral-A	RALA	2	3494100	0	4430400	4316400	5322700	5716300	3993100	5154300	1.23682	0.120267
Q9NNW7	Thioredoxin reductase 2, mitochondrial	TXNRD2	7	11729000	9767000	8587000	8088900	9199100	9315400	8799100	12320000	1.03829	0.742357
P62879	Guanine nucleotide-binding protein G(I)/G(S)/G(T) subunit beta-2	GNB2	3	0	1510100	952040	1571300	1724500	0	0	1542300	1.21489	0.379956
P62829	60S ribosomal protein L23	RPL23	10	97293000	125780000	102470000	118690000	115310000	127390000	135230000	95128000	1.06489	0.564459
O95336	6-phosphogluconolactonase	PGLS	9	37102000	38743000	36222000	38732000	34690000	44764000	44322000	40481000	1.08924	0.235818
O15321	Transmembrane 9 superfamily member 1	TM9SF1	3	8358100	7928500	5108400	8774100	5986700	7464800	6376400	9593000	0.9752	0.90277
P31943	Heterogeneous nuclear ribonucleoprotein H;Heterogeneous nuclear ribonucleoprotein H, N-terminally processed	HNRNPH1	15	155260000	168920000	184790000	173570000	149580000	169480000	153230000	155140000	0.919257	0.114889
P43246	DNA mismatch repair protein Msh2	MSH2	15	29790000	23922000	25352000	24796000	19805000	28568000	18990000	33325000	0.969459	0.714883
Q53EL6	Programmed cell death protein 4	PDCD4	6	6690000	12019000	12249000	9370200	5477500	7524700	5134100	4336300	0.557243	0.0194173
Q5H9L4	Transcription initiation factor TFIID subunit 7-like	TAF7L	1	4615100	157040	2142800	1925200	1562000	0	3386700	0	1.1196	0.64588
Q08426	Peroxisomal bifunctional enzyme;Enoyl-CoA hydratase/3,2-trans-enoyl-CoA isomerase;3-hydroxyacyl-CoA dehydrogenase	EHHADH	29	76980000	59481000	50380000	53249000	71304000	61722000	78707000	60233000	1.13277	0.286444
Q9UI10	Translation initiation factor eIF-2B subunit delta	EIF2B4	5	4871300	9554500	7501500	5428800	7029800	6151700	4455400	5720400	0.853824	0.482561
P50135	Histamine N-methyltransferase	HNMT	15	93261000	120070000	99861000	103530000	84348000	110260000	111320000	100430000	0.97513	0.758786
P12429	Annexin A3	ANXA3	6	5478400	10058000	7434200	5406500	7629600	10737000	9062800	9579700	1.30419	0.124758
Q16563	Synaptophysin-like protein 1	SYPL1	1	3423400	1624400	3311700	2577300	2069100	1939200	3111000	3208400	0.944307	0.851346
O15305	Phosphomannomutase 2	PMM2	8	30132000	23825000	25094000	25034000	19020000	32663000	25310000	31187000	1.03934	0.880662
P07910	Heterogeneous nuclear ribonucleoproteins C1/C2	HNRNPC	29	217390000	277930000	262550000	290350000	296990000	285780000	251520000	302780000	1.08476	0.30866
O43324	Eukaryotic translation elongation factor 1 epsilon-1	EEF1E1	6	10078000	13319000	8580700	16901000	13616000	15696000	18166000	17822000	1.33596	0.101715
P49821	NADH dehydrogenase [ubiquinone] flavoprotein 1, mitochondrial	NDUFV1	1	1818800	2519000	1596500	2374400	2216000	0	1779200	2728400	1.07897	0.654692
P00734	Prothrombin;Activation peptide fragment 1;Activation peptide fragment 2;Thrombin light chain;Thrombin heavy chain	F2	2	25180000	30470000	26805000	20028000	18300000	18715000	22286000	18510000	0.759258	0.0360519
Q9ULC5	Long-chain-fatty-acid--CoA ligase 5	ACSL5	24	91261000	89534000	87787000	83030000	66634000	78997000	78485000	73629000	0.8468	0.00918089
Q13177	Serine/threonine-protein kinase PAK 2;PAK-2p27;PAK-2p34	PAK2	16	49585000	52380000	41532000	36110000	50882000	54629000	33755000	51560000	1.06246	0.711287
Q9UBT2	SUMO-activating enzyme subunit 2	UBA2	23	70920000	73169000	75710000	71957000	74145000	74984000	56827000	79520000	0.978475	0.711939
O43464	Serine protease HTRA2, mitochondrial	HTRA2	5	8518900	12084000	8729900	11536000	11419000	8879100	13035000	8642300	1.02708	0.863583
O00505;O00629	Importin subunit alpha-4;Importin subunit alpha-3	KPNA3;KPNA4	6	14662000	17816000	17421000	12317000	15101000	12620000	13757000	12502000	0.867622	0.214482
Q9Y6D5	Brefeldin A-inhibited guanine nucleotide-exchange protein 2	ARFGEF2	9	13374000	12607000	14613000	12291000	14278000	13274000	13266000	14648000	1.0488	0.328872
P07099	Epoxide hydrolase 1	EPHX1	10	42349000	35061000	34500000	46114000	43812000	37816000	51255000	36638000	1.07275	0.53618
P50226	Sulfotransferase 1A2	SULT1A2	1	818520	1672500	1780100	2854700	1819600	1207800	1927000	1070400	0.845489	0.730358
P13861	cAMP-dependent protein kinase type II-alpha regulatory subunit	PRKAR2A	16	29780000	27578000	23608000	26370000	20002000	31112000	26513000	30911000	1.0112	0.99582
P49748	Very long-chain specific acyl-CoA dehydrogenase, mitochondrial	ACADVL	19	34890000	36054000	40079000	37265000	41048000	34216000	38487000	36925000	1.0161	0.764803
O43660	Pleiotropic regulator 1	PLRG1	5	0	12660000	10514000	11342000	7492100	11564000	5129500	8173700	0.703137	0.111898
P52272	Heterogeneous nuclear ribonucleoprotein M	HNRNPM	56	439900000	692910000	621460000	510580000	419390000	484540000	323490000	572680000	0.794799	0.185443
P23246	Splicing factor, proline- and glutamine-rich	SFPQ	54	381270000	326660000	292180000	308880000	331930000	302960000	326040000	392350000	1.03384	0.684877
P43155	Carnitine O-acetyltransferase	CRAT	4	4974700	3456000	3174400	3979800	3782600	4005000	4250300	4490800	1.06056	0.520839
O94906	Pre-mRNA-processing factor 6	PRPF6	19	29354000	31828000	27286000	26867000	24502000	26336000	27668000	33032000	0.967079	0.633749
O94992	Protein HEXIM1	HEXIM1	5	9023700	6841700	6566200	6252300	6672000	0	4755000	9015800	0.950257	0.701862
Q99447	Ethanolamine-phosphate cytidylyltransferase	PCYT2	16	73758000	57752000	53878000	69685000	63292000	55583000	67355000	58422000	0.959145	0.689278
P35580	Myosin-10	MYH10	43	59454000	84526000	69770000	50759000	73013000	85476000	87070000	103900000	1.32116	0.0696328
P04066	Tissue alpha-L-fucosidase	FUCA1	3	2370100	1672000	2987800	1631300	951790	2954900	2490200	0	0.984758	0.799734
P08319	Alcohol dehydrogenase 4	ADH4	17	31920000	29105000	16401000	40258000	25372000	34258000	61814000	35697000	1.33528	0.325265
Q9NRP0	Oligosaccharyltransferase complex subunit OSTC	OSTC	2	6590100	7616500	6688900	9573900	12166000	7528900	9542700	6222800	1.1638	0.466299
O60218	Aldo-keto reductase family 1 member B10	AKR1B10	7	9274800	15724000	14511000	9984400	7525400	14986000	12997000	14110000	1.00251	0.980101
Q13148	TAR DNA-binding protein 43	TARDBP	11	44258000	55727000	52193000	43829000	44626000	48150000	33980000	61345000	0.959665	0.685389
Q7Z340	Zinc finger protein 551	ZNF551	1	31520000	20977000	13422000	24162000	25485000	14504000	0	0	0.887845	0.741468
Q9Y6V7	Probable ATP-dependent RNA helicase DDX49	DDX49	1	0	0	906530	0	0	681500	635320	672740	0.731566	1
P15170;Q8IYD1	Eukaryotic peptide chain release factor GTP-binding subunit ERF3A;Eukaryotic peptide chain release factor GTP-binding subunit ERF3B	GSPT1;GSPT2	18	52889000	65142000	67776000	53084000	50758000	56815000	46138000	66329000	0.92109	0.437448
Q15365	Poly(rC)-binding protein 1	PCBP1	14	476180000	535950000	522290000	518430000	502630000	544450000	396100000	530550000	0.961458	0.572979
P36957	Dihydrolipoyllysine-residue succinyltransferase component of 2-oxoglutarate dehydrogenase complex, mitochondrial	DLST	14	102880000	86717000	88568000	103260000	83461000	81414000	99056000	79475000	0.900324	0.17498
Q14165	Malectin	MLEC	5	30833000	22733000	17427000	26118000	28671000	22724000	37229000	21364000	1.1326	0.513484
Q9NP81	Serine--tRNA ligase, mitochondrial	SARS2	15	41388000	28869000	27999000	37625000	31866000	30474000	37667000	32923000	0.978282	0.9211
P55268	Laminin subunit beta-2	LAMB2	14	5116800	5813700	5779300	8362100	5922300	3625900	4793100	3799100	0.723535	0.0809354
P54105	Methylosome subunit pICln	CLNS1A	4	19444000	17961000	16190000	13040000	21716000	19683000	19665000	22639000	1.25614	0.0444726
P25789	Proteasome subunit alpha type-4	PSMA4	7	25591000	25696000	34542000	30939000	26180000	25754000	29905000	30177000	0.959304	0.686096
Q03701	CCAAT/enhancer-binding protein zeta	CEBPZ	8	9474100	9955100	7395400	6887900	7338500	7201400	7908000	10353000	0.97296	0.839139
P09668	Pro-cathepsin H;Cathepsin H mini chain;Cathepsin H;Cathepsin H heavy chain;Cathepsin H light chain	CTSH	5	7891300	6848500	8088200	9421300	7575500	9274300	7090300	10988000	1.08307	0.572256
O15230	Laminin subunit alpha-5	LAMA5	20	29107000	50709000	37080000	30398000	33244000	31484000	35683000	28532000	0.875412	0.440925
Q9NUU7	ATP-dependent RNA helicase DDX19A	DDX19A	5	10168000	11121000	12246000	9887100	8648100	9920700	5955600	12148000	0.844556	0.25675
Q8TEX9	Importin-4	IPO4	25	116700000	102100000	129300000	112160000	114270000	113950000	114000000	82823000	0.923485	0.399222
P39019	40S ribosomal protein S19	RPS19	21	261450000	275780000	244910000	276870000	250410000	244220000	210540000	299420000	0.948612	0.473569
O60488	Long-chain-fatty-acid--CoA ligase 4	ACSL4	37	229110000	216190000	205010000	205670000	199190000	211430000	210360000	209910000	0.970689	0.364888
P31942	Heterogeneous nuclear ribonucleoprotein H3	HNRNPH3	11	56787000	63732000	55358000	56715000	55944000	51195000	48735000	60828000	0.931683	0.258021
Q06520	Bile salt sulfotransferase	SULT2A1	13	55482000	76550000	67623000	92052000	87457000	70102000	121140000	48746000	1.12251	0.731883
Q3LXA3	Bifunctional ATP-dependent dihydroxyacetone kinase/FAD-AMP lyase (cyclizing);ATP-dependent dihydroxyacetone kinase;FAD-AMP lyase (cyclizing)	DAK	41	388630000	299610000	325020000	389870000	347350000	292590000	393900000	288570000	0.942471	0.560704
Q15125	3-beta-hydroxysteroid-Delta(8),Delta(7)-isomerase	EBP	1	2926600	2839100	2441700	2917200	2963600	2523300	3256400	2590500	1.01881	0.835554
Q86TI2	Dipeptidyl peptidase 9	DPP9	3	2765400	1861600	2373800	2144600	2131900	2102400	2343500	2868800	1.03293	0.761796
Q8TC12	Retinol dehydrogenase 11	RDH11	3	2480100	2924200	3584100	3681100	1684500	3037200	2570900	2288800	0.756257	0.111699
P62263	40S ribosomal protein S14	RPS14	11	107840000	100830000	85085000	122610000	113090000	100630000	114600000	108690000	1.04958	0.519713
O00264	Membrane-associated progesterone receptor component 1	PGRMC1	7	70110000	55946000	60395000	66788000	63640000	64953000	81191000	75948000	1.12831	0.177621
P28066	Proteasome subunit alpha type-5	PSMA5	8	54674000	58839000	73417000	62209000	58957000	76984000	69822000	74385000	1.12446	0.219616
P24539	ATP synthase F(0) complex subunit B1, mitochondrial	ATP5F1	12	51797000	40427000	44117000	58106000	59676000	56118000	67406000	73138000	1.31829	0.0315056
Q15084	Protein disulfide-isomerase A6	PDIA6	27	1286400000	1502800000	1251500000	1164200000	1068200000	1077800000	1065500000	1112400000	0.830736	0.0161337
P13804	Electron transfer flavoprotein subunit alpha, mitochondrial	ETFA	22	232500000	218240000	189420000	239310000	229000000	259050000	272390000	245960000	1.14433	0.076224
O75521	Enoyl-CoA delta isomerase 2, mitochondrial	ECI2	23	90133000	79555000	65634000	83519000	69955000	78444000	107320000	91422000	1.08876	0.519486
P37059	Estradiol 17-beta-dehydrogenase 2	HSD17B2	6	10089000	7256300	6756400	7712700	5172700	6302200	8473500	8382500	0.890506	0.431596
P30041	Peroxiredoxin-6	PRDX6	24	380300000	287480000	419970000	461230000	214950000	165500000	218320000	148080000	0.482156	0.00205301
Q9P035	Very-long-chain (3R)-3-hydroxyacyl-CoA dehydratase 3	HACD3	9	21820000	14527000	18583000	13514000	15106000	16951000	16961000	18160000	0.981503	0.98488
P09455	Retinol-binding protein 1	RBP1	2	3554500	5084200	7743500	3884100	5715500	10800000	6149300	5078600	1.36894	0.239096
P25205	DNA replication licensing factor MCM3	MCM3	27	54378000	62834000	56832000	55689000	49351000	48999000	42033000	57914000	0.863163	0.081617
O60716	Catenin delta-1	CTNND1	33	101930000	108660000	123330000	96638000	97172000	101440000	77831000	96823000	0.866935	0.120742
P00738;P00739	Haptoglobin;Haptoglobin alpha chain;Haptoglobin beta chain;Haptoglobin-related protein	HP;HPR	4	5094800	4813700	5760400	3965400	3046200	2492400	3038200	4836100	0.683136	0.0458285
P30101	Protein disulfide-isomerase A3	PDIA3	67	3280400000	3665400000	3191300000	3050000000	2407400000	2371300000	2226300000	2605300000	0.728765	0.000796369
P42285	Superkiller viralicidic activity 2-like 2	SKIV2L2	7	14221000	9669300	13188000	15938000	19906000	18293000	20014000	25713000	1.58302	0.0113688
P60953	Cell division control protein 42 homolog	CDC42	7	32134000	29636000	23663000	35295000	33497000	28273000	48877000	36300000	1.21717	0.238265
Q13427	Peptidyl-prolyl cis-trans isomerase G	PPIG	9	7036800	3771200	3006300	4280000	3879300	4893500	4576900	3796500	0.947602	0.965265
Q14137	Ribosome biogenesis protein BOP1	BOP1	9	25184000	23494000	14074000	22167000	23181000	18767000	21275000	21446000	0.997056	0.900156
Q9UGV2	Protein NDRG3	NDRG3	5	5680500	17526000	13781000	9692500	9399700	9612200	9093200	9449000	0.804501	0.602569
Q13576	Ras GTPase-activating-like protein IQGAP2	IQGAP2	37	94772000	68524000	81311000	75295000	91785000	75786000	90069000	79406000	1.05359	0.525224
P51649	Succinate-semialdehyde dehydrogenase, mitochondrial	ALDH5A1	17	85092000	71664000	64465000	72286000	66689000	62542000	64743000	79176000	0.930642	0.394945
P38117	Electron transfer flavoprotein subunit beta	ETFB	22	178080000	145600000	158230000	166930000	192610000	191270000	200960000	199930000	1.2095	0.00490419
P61011	Signal recognition particle 54 kDa protein	SRP54	14	21752000	20066000	18378000	15524000	15460000	13888000	14977000	20071000	0.850449	0.178523
Q00325	Phosphate carrier protein, mitochondrial	SLC25A3	11	51833000	67627000	60112000	58792000	57323000	77787000	81944000	72640000	1.21534	0.0941801
Q9NV31	U3 small nucleolar ribonucleoprotein protein IMP3	IMP3	1	2118300	1975200	1739700	2060800	2646600	2216100	4193100	2649900	1.48286	0.0425956
Q96IJ6	Mannose-1-phosphate guanyltransferase alpha	GMPPA	3	1738500	4497100	5592200	3553200	4302700	5277700	2462300	2401900	0.93912	0.913741
Q8TDN6	Ribosome biogenesis protein BRX1 homolog	BRIX1	7	9266200	15290000	11856000	9377500	7432100	8515400	4336400	14652000	0.762964	0.263299
Q13564	NEDD8-activating enzyme E1 regulatory subunit	NAE1	8	10897000	11758000	10058000	9864900	10885000	10783000	8926000	10440000	0.963739	0.561956
Q9Y2R5	28S ribosomal protein S17, mitochondrial	MRPS17	3	5896300	5186600	4447400	3814200	4669700	7640600	3778500	5190500	1.10002	0.684109
P62136;P36873	Serine/threonine-protein phosphatase PP1-alpha catalytic subunit;Serine/threonine-protein phosphatase PP1-gamma catalytic subunit	PPP1CA;PPP1CC	3	6953800	7920300	6677200	6363500	9774800	7575500	9226500	11211000	1.35368	0.0196577
Q15181	Inorganic pyrophosphatase	PPA1	17	130370000	168740000	141090000	155240000	125090000	182790000	169290000	139030000	1.03486	0.798991
Q9NUQ6	SPATS2-like protein	SPATS2L	9	25988000	38911000	29614000	24087000	29584000	25839000	25719000	37037000	0.99645	0.986697
Q6YN16	Hydroxysteroid dehydrogenase-like protein 2	HSDL2	13	92906000	83697000	63453000	75309000	80083000	70147000	89816000	78380000	1.00971	0.876211
Q03154	Aminoacylase-1	ACY1	15	91940000	83851000	73785000	90501000	82810000	80399000	110700000	102740000	1.10754	0.342489
Q5BJD5	Transmembrane protein 41B	TMEM41B	1	2890300	3713000	2611700	3281300	2297000	2416500	2144500	3301000	0.812961	0.132527
P52948	Nuclear pore complex protein Nup98-Nup96;Nuclear pore complex protein Nup98;Nuclear pore complex protein Nup96	NUP98	10	5687100	7281800	4703500	4225000	4933800	4640900	5103700	4072100	0.856289	0.330517
Q15024	Exosome complex component RRP42	EXOSC7	4	3283600	3420700	2397000	2914000	3452200	3285000	3292400	3291000	1.10864	0.21375
Q9H444	Charged multivesicular body protein 4b	CHMP4B	6	13487000	15336000	15463000	6772000	14617000	15975000	11832000	22057000	1.2629	0.31437
Q13557;Q9UQM7;Q13554	Calcium/calmodulin-dependent protein kinase type II subunit delta;Calcium/calmodulin-dependent protein kinase type II subunit alpha;Calcium/calmodulin-dependent protein kinase type II subunit beta	CAMK2D;CAMK2A;CAMK2B	7	19672000	17965000	19844000	16698000	15601000	21790000	17447000	20318000	1.01317	0.936035
Q13573	SNW domain-containing protein 1	SNW1	3	4502200	4760200	3661900	9147700	8491900	7602300	10790000	4142200	1.40569	0.266836
O75843	AP-1 complex subunit gamma-like 2	AP1G2	3	2392200	1600500	2551300	2157400	2283900	2975000	2262100	2698600	1.17448	0.217441
P35232	Prohibitin	PHB	19	91644000	141290000	114490000	120910000	117920000	137650000	144530000	147160000	1.16853	0.161878
P26440	Isovaleryl-CoA dehydrogenase, mitochondrial	IVD	11	27422000	30306000	30180000	34791000	30535000	36810000	36889000	35512000	1.13893	0.0961754
P02787	Serotransferrin	TF	33	288000000	244160000	235820000	226850000	180390000	180150000	171260000	177890000	0.713378	0.000816162
Q9BW60	Elongation of very long chain fatty acids protein 1	ELOVL1	1	2654400	4189600	2352800	0	2073000	2946700	2152900	3720900	0.888366	0.622064
Q9H2M9	Rab3 GTPase-activating protein non-catalytic subunit	RAB3GAP2	7	11187000	7662100	8805600	7721900	7175700	6297700	6238000	11317000	0.877088	0.398168
P34741	Syndecan-2	SDC2	3	15266000	9359000	5805200	6981100	6910700	6968500	10436000	10585000	0.932879	0.933233
P83731	60S ribosomal protein L24	RPL24	21	80928000	120690000	95594000	119070000	106680000	107600000	93197000	109440000	1.00153	0.903774
Q8IY67	Ribonucleoprotein PTB-binding 1	RAVER1	2	5423800	1875400	1362200	1499100	1887900	837670	1247800	1245800	0.513673	0.187384
Q10570	Cleavage and polyadenylation specificity factor subunit 1	CPSF1	7	10272000	9179000	8048200	9522100	11337000	10627000	9577800	9652900	1.11273	0.147586
P11047	Laminin subunit gamma-1	LAMC1	23	28261000	36876000	33787000	27382000	23079000	33243000	25312000	34243000	0.917431	0.473459
Q9Y383	Putative RNA-binding protein Luc7-like 2	LUC7L2	5	6138800	13424000	9008800	7895500	7200300	7938400	9729900	11945000	1.0095	0.879781
P00450	Ceruloplasmin	CP	2	3444600	0	3645300	2400100	4260200	3860300	2835200	0	1.15445	0.462877
P09104	Gamma-enolase	ENO2	7	15092000	15469000	16593000	15470000	12989000	17880000	15377000	11464000	0.921532	0.374231
P11166	Solute carrier family 2, facilitated glucose transporter member 1	SLC2A1	10	316840000	470470000	361510000	302310000	275460000	286810000	296700000	315580000	0.809404	0.104726
Q9UGI8	Testin	TES	8	2966900	6622700	4081700	5745500	5146200	7804100	6658000	6829000	1.36157	0.135841
P33240	Cleavage stimulation factor subunit 2	CSTF2	2	3469600	3079300	2967300	3399600	4222600	3609600	3812400	4749500	1.26931	0.0165037
P49326	Dimethylaniline monooxygenase [N-oxide-forming] 5	FMO5	7	7154700	7279700	5791500	8871400	6567900	9136900	10923000	6937700	1.15356	0.404383
Q96I99	Succinyl-CoA ligase [GDP-forming] subunit beta, mitochondrial	SUCLG2	21	105030000	83866000	80678000	106940000	80952000	89522000	108080000	102730000	1.01267	0.889748
P37802	Transgelin-2	TAGLN2	14	26337000	26500000	31441000	25977000	35263000	49998000	34792000	40495000	1.45615	0.00843174
P31483	Nucleolysin TIA-1 isoform p40	TIA1	2	3227800	3372900	2206900	2166800	1786900	2077800	2444800	4375300	0.973611	0.777862
Q9BWU0	Kanadaptin	SLC4A1AP	3	3364700	2804900	3520900	3181500	2245800	2672200	4054600	3567800	0.974239	0.742511
Q03426	Mevalonate kinase	MVK	8	3666200	13118000	5326000	10372000	8461300	10902000	13108000	6415800	1.19718	0.451532
P11940;Q9H361	Polyadenylate-binding protein 1;Polyadenylate-binding protein 3	PABPC1;PABPC3	26	258810000	250590000	210500000	243760000	210080000	244830000	270230000	247690000	1.00952	0.906778
Q53GQ0	Very-long-chain 3-oxoacyl-CoA reductase	HSD17B12	9	27295000	45477000	48444000	41492000	44351000	47940000	46428000	47113000	1.14212	0.277239
P61457	Pterin-4-alpha-carbinolamine dehydratase	PCBD1	2	11833000	9382800	10194000	17330000	13958000	11012000	22577000	8766500	1.15539	0.668451
Q86U42	Polyadenylate-binding protein 2	PABPN1	6	20734000	22575000	23144000	31737000	24580000	16693000	24674000	14322000	0.817487	0.242445
P05091	Aldehyde dehydrogenase, mitochondrial	ALDH2	33	434730000	353260000	323860000	428780000	336830000	270340000	388590000	311180000	0.848315	0.166729
O43175	D-3-phosphoglycerate dehydrogenase	PHGDH	35	424600000	496560000	543920000	536960000	417890000	457510000	367690000	483230000	0.86228	0.121511
P46782	40S ribosomal protein S5;40S ribosomal protein S5, N-terminally processed	RPS5	17	189440000	240790000	195340000	216140000	197600000	261110000	191490000	265970000	1.08846	0.480773
Q9UJS0	Calcium-binding mitochondrial carrier protein Aralar2	SLC25A13	12	24365000	44851000	40790000	41390000	34023000	32055000	36783000	45217000	0.978084	0.979503
Q96RS6	NudC domain-containing protein 1	NUDCD1	3	6904200	8287300	7754500	5360300	6503800	6268600	6406600	8883000	0.991369	0.962615
Q9Y5A9	YTH domain-containing family protein 2	YTHDF2	2	3010900	3501300	2352300	2854200	3589400	2483300	2306200	4452900	1.09498	0.726926
O15173	Membrane-associated progesterone receptor component 2	PGRMC2	7	34677000	35314000	35691000	40500000	37397000	42744000	51630000	44465000	1.20559	0.0516215
Q13601	KRR1 small subunit processome component homolog	KRR1	3	0	4713800	4154200	5736200	4583400	5031800	6415400	4295900	1.04387	0.772144
P37268	Squalene synthase	FDFT1	14	52019000	55130000	37775000	60819000	53119000	42534000	61607000	53341000	1.02361	0.823673
Q8NEZ2	Vacuolar protein sorting-associated protein 37A	VPS37A	1	1123500	0	757180	0	961860	0	942590	1082000	1.05864	0.668086
Q04760	Lactoylglutathione lyase	GLO1	12	61552000	50784000	67574000	74479000	84992000	81249000	90765000	98869000	1.39894	0.00983155
Q9C0B1	Alpha-ketoglutarate-dependent dioxygenase FTO	FTO	4	14881000	7811800	9483100	9931300	9670200	11017000	9949500	7717900	0.91088	0.654466
Q9H4A6	Golgi phosphoprotein 3	GOLPH3	3	5314900	4862000	2417000	3095400	3500800	1852700	3178500	3188600	0.747044	0.297525
Q9H9Q2	COP9 signalosome complex subunit 7b	COPS7B	4	9157600	8991000	8626300	8997100	5844600	8703100	11962000	10821000	1.04357	0.964091
Q9Y3A5	Ribosome maturation protein SBDS	SBDS	3	1896500	2250500	2049300	1598000	2532900	2228800	2450000	2900000	1.29732	0.0271433
Q5T2W1;A8MUH7	Na(+)/H(+) exchange regulatory cofactor NHE-RF3;Putative PDZ domain-containing protein 1P	PDZK1;PDZK1P1	12	30923000	15034000	15869000	18899000	17392000	12466000	23393000	13420000	0.825903	0.441244
P22033	Methylmalonyl-CoA mutase, mitochondrial	MUT	15	44588000	32936000	28342000	40278000	43108000	27695000	41022000	21349000	0.911252	0.568143
O75828	Carbonyl reductase [NADPH] 3	CBR3	1	1956800	4169200	2382900	3297500	2895800	3174900	2934400	3596100	1.06732	0.57617
O14745	Na(+)/H(+) exchange regulatory cofactor NHE-RF1	SLC9A3R1	31	280600000	235670000	199450000	234940000	238390000	168010000	250850000	214640000	0.917142	0.45358
Q7Z2K6	Endoplasmic reticulum metallopeptidase 1	ERMP1	7	14231000	13827000	14570000	12611000	17154000	17450000	16626000	13195000	1.1663	0.0851837
P62913	60S ribosomal protein L11	RPL11	10	66729000	72173000	75026000	79103000	91757000	84689000	79523000	76571000	1.13483	0.0561756
Q96EY1	DnaJ homolog subfamily A member 3, mitochondrial	DNAJA3	7	7047500	8930300	6408400	7431000	9069400	5838700	9301300	6948800	1.04497	0.809334
P46952	3-hydroxyanthranilate 3,4-dioxygenase	HAAO	3	3800000	4380400	4649600	3992100	3761600	3657300	2912000	2456300	0.760143	0.0412874
Q01780	Exosome component 10	EXOSC10	12	20431000	21383000	30217000	23820000	24480000	27327000	24176000	22029000	1.02255	0.760641
P40926	Malate dehydrogenase, mitochondrial	MDH2	25	464490000	604150000	495600000	515280000	476310000	542210000	628650000	454330000	1.01057	0.939892
Q15257	Serine/threonine-protein phosphatase 2A activator	PPP2R4	5	6618000	8184400	5905900	6362700	6162600	7129900	8286700	8132400	1.09754	0.375938
Q9HAV7	GrpE protein homolog 1, mitochondrial	GRPEL1	15	70602000	43441000	56605000	63208000	52831000	64828000	57370000	63259000	1.01895	0.794172
Q93099	Homogentisate 1,2-dioxygenase	HGD	13	51328000	43301000	44151000	48475000	42544000	37407000	54930000	36815000	0.91691	0.369848
P00966	Argininosuccinate synthase	ASS1	2	4813100	7330400	5994800	5850000	4363200	0	7650200	5149500	0.953959	0.723657
P16930	Fumarylacetoacetase	FAH	13	23527000	26195000	26075000	27875000	23114000	31473000	28109000	29339000	1.08067	0.367081
O43583	Density-regulated protein	DENR	2	7627400	15990000	18509000	17430000	11535000	8521500	18780000	12416000	0.860571	0.625889
Q6FI81	Anamorsin	CIAPIN1	6	14807000	16637000	15954000	19488000	14114000	15083000	8803900	24309000	0.931584	0.569176
Q8IVL6	Prolyl 3-hydroxylase 3	LEPREL2	5	5007000	3732500	3118500	4931300	2692200	3421100	3582100	3027300	0.757786	0.0910319
P68402	Platelet-activating factor acetylhydrolase IB subunit beta	PAFAH1B2	4	32472000	37359000	37720000	35705000	39134000	47824000	35589000	72695000	1.36289	0.144925
P15848	Arylsulfatase B	ARSB	5	12626000	12687000	10766000	13591000	9206000	12450000	9345300	9068200	0.806714	0.050691
Q9HDC9	Adipocyte plasma membrane-associated protein	APMAP	16	162820000	153910000	173000000	141090000	113840000	137090000	148060000	157520000	0.882201	0.16766
O94888	UBX domain-containing protein 7	UBXN7	3	4526200	2921200	2651500	4239900	3843500	5045800	8167800	3831200	1.45677	0.164848
P82650	28S ribosomal protein S22, mitochondrial	MRPS22	4	6838000	7880400	6680400	7342900	5684600	9084700	7660000	8502500	1.0762	0.604153
Q15629	Translocating chain-associated membrane protein 1	TRAM1	4	4597200	12685000	8140300	4607700	4266300	6207500	4877300	10333000	0.855276	0.707482
P43243	Matrin-3	MATR3	30	250100000	250560000	190460000	192560000	234060000	163180000	183550000	224060000	0.910793	0.43891
Q13247	Serine/arginine-rich splicing factor 6	SRSF6	7	54232000	62094000	53161000	44438000	44027000	45923000	26487000	55861000	0.805413	0.207914
O14773	Tripeptidyl-peptidase 1	TPP1	5	36137000	32057000	28854000	36069000	26086000	29163000	32455000	32711000	0.90458	0.234573
P24752	Acetyl-CoA acetyltransferase, mitochondrial	ACAT1	31	294600000	307910000	277980000	286300000	286190000	330770000	247150000	309000000	1.00542	0.995954
P07686	Beta-hexosaminidase subunit beta;Beta-hexosaminidase subunit beta chain B;Beta-hexosaminidase subunit beta chain A	HEXB	5	14425000	19442000	19236000	10690000	11231000	14739000	4263000	17592000	0.74969	0.310031
Q8WVM8	Sec1 family domain-containing protein 1	SCFD1	23	147920000	127530000	121850000	131180000	112450000	129340000	140040000	118360000	0.946469	0.41404
Q9Y3Y2	Chromatin target of PRMT1 protein	CHTOP	3	2169600	5976900	5642600	5124400	1524800	2404300	750810	2666300	0.388411	0.039032
P56537	Eukaryotic translation initiation factor 6	EIF6	6	96068000	74509000	96513000	93379000	98775000	121230000	83575000	96228000	1.10913	0.34882
Q8WZ82	Ovarian cancer-associated gene 2 protein	OVCA2	2	825250	1380900	0	618600	724730	0	812260	1077700	0.925636	0.900083
P31040	Succinate dehydrogenase [ubiquinone] flavoprotein subunit, mitochondrial	SDHA	8	18411000	16809000	16148000	15259000	14999000	10340000	12936000	17631000	0.839089	0.160886
Q8IX12	Cell division cycle and apoptosis regulator protein 1	CCAR1	10	15814000	16370000	14076000	13021000	15253000	17618000	13710000	17477000	1.08058	0.376227
Q9UDY2	Tight junction protein ZO-2	TJP2	21	39432000	47403000	36467000	31841000	38907000	35633000	31513000	37870000	0.92768	0.503555
P62266	40S ribosomal protein S23	RPS23	11	40105000	60380000	49428000	59303000	53325000	59538000	54093000	54572000	1.05885	0.507778
Q9UHB6	LIM domain and actin-binding protein 1	LIMA1	6	1969400	2770300	3098200	3114800	1553300	2845100	1884900	2738800	0.823733	0.294956
Q9NPF4	Probable tRNA N6-adenosine threonylcarbamoyltransferase	OSGEP	2	1504900	1647500	1981300	1273600	1300600	3121500	0	2121600	1.36172	0.326102
O75608	Acyl-protein thioesterase 1	LYPLA1	8	20801000	18168000	19623000	23328000	25872000	27139000	27100000	28687000	1.3281	0.00230742
P09669	Cytochrome c oxidase subunit 6C	COX6C	2	4937100	5418700	3301800	5373700	4870400	5408700	7079100	5767700	1.21515	0.197982
P62191	26S protease regulatory subunit 4	PSMC1	21	69607000	63296000	68869000	56814000	72450000	52304000	68394000	58870000	0.9746	0.739025
P25398	40S ribosomal protein S12	RPS12	11	78278000	52323000	43090000	44096000	79114000	56042000	76499000	55464000	1.22651	0.238123
Q9Y4C2	TRPM8 channel-associated factor 1	TCAF1	9	6888300	4736700	7064300	7814500	9270300	10052000	8067700	8008100	1.33559	0.0494478
O43172	U4/U6 small nuclear ribonucleoprotein Prp4	PRPF4	4	5561700	5622600	7964400	5636100	4860300	6887900	5760600	6920900	0.985673	0.920893
P78344	Eukaryotic translation initiation factor 4 gamma 2	EIF4G2	14	26998000	36099000	24680000	20857000	18915000	24122000	18783000	24019000	0.790167	0.149599
P42126	Enoyl-CoA delta isomerase 1, mitochondrial	ECI1	4	65575000	67102000	68949000	70355000	76816000	97248000	98751000	80452000	1.29887	0.00835108
O15355	Protein phosphatase 1G	PPM1G	22	140260000	136640000	120250000	129080000	129290000	113920000	94550000	132330000	0.893317	0.205044
Q9NWU1	3-oxoacyl-[acyl-carrier-protein] synthase, mitochondrial	OXSM	1	1242500	1257100	1104400	1133600	1137600	833680	1871000	0	1.08136	0.911322
Q9BPW8	Protein NipSnap homolog 1	NIPSNAP1	15	107260000	88792000	100590000	131470000	156650000	138440000	159670000	115820000	1.33278	0.0393919
P09661	U2 small nuclear ribonucleoprotein A	SNRPA1	10	23044000	33294000	50258000	33960000	25186000	31629000	31668000	32878000	0.863435	0.528076
O14964	Hepatocyte growth factor-regulated tyrosine kinase substrate	HGS	8	20866000	19871000	17139000	18604000	20234000	16325000	18286000	20587000	0.986297	0.830265
P49189	4-trimethylaminobutyraldehyde dehydrogenase	ALDH9A1	9	21364000	18996000	18695000	20411000	14155000	23681000	23640000	17767000	0.997194	0.858915
P16083	Ribosyldihydronicotinamide dehydrogenase [quinone]	NQO2	3	1357700	1511500	1906100	2047200	1745200	1468200	2462100	1611700	1.06811	0.701333
Q9Y617	Phosphoserine aminotransferase	PSAT1	22	224660000	294660000	238970000	243490000	221790000	296660000	294630000	323180000	1.13424	0.272925
Q8IX01	SURP and G-patch domain-containing protein 2	SUGP2	1	858720	890740	812530	772810	811640	870790	913870	1404500	1.19971	0.259353
P62805	Histone H4	HIST1H4A	7	26101000	40516000	24913000	40797000	43475000	43522000	51367000	27403000	1.25271	0.279925
Q9H910	Hematological and neurological expressed 1-like protein	HN1L	3	6238200	13878000	6981000	5250100	6423100	8768800	3965800	6503800	0.793312	0.495129
Q96CN7	Isochorismatase domain-containing protein 1	ISOC1	6	28639000	32276000	25287000	28358000	28333000	36179000	29433000	25561000	1.04317	0.683165
O00159	Unconventional myosin-Ic	MYO1C	13	23407000	23098000	25928000	18539000	28621000	27841000	26017000	30591000	1.24291	0.0290442
Q15758	Neutral amino acid transporter B(0)	SLC1A5	11	76872000	57279000	69602000	63172000	70776000	47326000	55427000	83266000	0.962049	0.703047
P11171	Protein 4.1	EPB41	2	1652900	4002500	2608400	2650800	2225600	2780800	1826400	2659400	0.869679	0.626096
P62633	Cellular nucleic acid-binding protein	CNBP	7	8249500	13556000	12678000	14344000	11016000	14236000	12697000	18556000	1.15724	0.406925
Q96P70	Importin-9	IPO9	5	12216000	6086000	9184300	7693200	11155000	8071300	7907100	6987000	0.969894	0.941299
Q13033	Striatin-3	STRN3	8	17307000	22647000	17031000	18906000	15483000	18779000	13599000	14369000	0.819992	0.0832537
Q92530	Proteasome inhibitor PI31 subunit	PSMF1	4	12115000	11670000	10686000	13455000	13358000	11714000	14191000	13867000	1.10858	0.156573
Q3MHD2	Protein LSM12 homolog	LSM12	4	12066000	5399700	3902200	10691000	13956000	4739000	5090900	5634800	0.917708	0.816206
P16949	Stathmin	STMN1	18	87894000	90071000	89020000	85243000	67074000	68867000	63542000	97486000	0.843116	0.107224
P0DMV9;P0DMV8	Heat shock 70 kDa protein 1B;Heat shock 70 kDa protein 1A	HSPA1B;HSPA1A	29	859590000	781940000	763510000	744550000	702830000	619290000	718590000	708490000	0.872876	0.0265395
Q8NBJ5	Procollagen galactosyltransferase 1	COLGALT1	11	39927000	40807000	40454000	32873000	35267000	36631000	28948000	28818000	0.841641	0.077208
Q14566	DNA replication licensing factor MCM6	MCM6	12	22737000	19550000	25421000	18913000	20394000	13455000	10747000	20872000	0.755798	0.128248
O75874	Isocitrate dehydrogenase [NADP] cytoplasmic	IDH1	40	951590000	926350000	930770000	1001500000	803190000	1033300000	883710000	1108400000	1.00483	0.972703
Q92890	Ubiquitin fusion degradation protein 1 homolog	UFD1L	4	12554000	7958400	8091800	7321800	12486000	8364100	16610000	5841100	1.20529	0.622431
P05455	Lupus La protein	SSB	35	208970000	233180000	190020000	222810000	202930000	184510000	263100000	242640000	1.04468	0.704352
Q8NBX0	Saccharopine dehydrogenase-like oxidoreductase	SCCPDH	5	14237000	13604000	10500000	16172000	12129000	15117000	16335000	16539000	1.10286	0.410045
P0DN79;P35520	Cystathionine beta-synthase	CBS	3	6651600	5015200	4674300	5032100	5010700	4124200	3997100	3747200	0.789737	0.0590391
P04424	Argininosuccinate lyase	ASL	8	9200500	6567800	5355600	6771300	5294100	6155900	5554200	8441400	0.912186	0.577669
Q9Y3E5	Peptidyl-tRNA hydrolase 2, mitochondrial	PTRH2	3	5114200	0	3656200	8153800	4933100	11361000	8237200	16547000	1.82039	0.181169
P49207	60S ribosomal protein L34	RPL34	8	23904000	44920000	27704000	42143000	32433000	32577000	31968000	41858000	1.00119	0.863961
P00367;P49448	Glutamate dehydrogenase 1, mitochondrial;Glutamate dehydrogenase 2, mitochondrial	GLUD1;GLUD2	47	2057600000	1676900000	1592300000	2050800000	1753200000	1409200000	1992700000	1386400000	0.88667	0.300001
Q9UBQ7	Glyoxylate reductase/hydroxypyruvate reductase	GRHPR	12	53026000	57227000	52978000	60007000	55078000	67311000	60765000	52737000	1.05668	0.43578
Q08945	FACT complex subunit SSRP1	SSRP1	11	5663200	3597300	7520300	6364700	3674000	32082000	2955500	5645900	1.91646	0.766173
Q15185	Prostaglandin E synthase 3	PTGES3	5	44692000	23941000	31553000	45190000	53821000	46271000	45177000	38250000	1.26237	0.173701
Q93052	Lipoma-preferred partner	LPP	7	17930000	15652000	10612000	12790000	17497000	9859300	5070100	11888000	0.777664	0.295416
Q13263	Transcription intermediary factor 1-beta	TRIM28	36	216360000	255740000	306750000	245240000	222390000	235280000	210190000	228010000	0.874796	0.146867
P56385	ATP synthase subunit e, mitochondrial	ATP5I	3	11369000	10720000	11040000	4425900	12600000	8656700	15473000	11003000	1.27101	0.314798
Q7Z4V5	Hepatoma-derived growth factor-related protein 2	HDGFRP2	9	32188000	23359000	18909000	20228000	30051000	25355000	32309000	26440000	1.20564	0.169824
P78330	Phosphoserine phosphatase	PSPH	14	82026000	78443000	86034000	95152000	91889000	102040000	97092000	96733000	1.13493	0.0329941
P53999	Activated RNA polymerase II transcriptional coactivator p15	SUB1	11	198200000	180480000	168390000	201930000	217240000	183640000	154070000	192530000	0.997971	0.936675
Q9UK22	F-box only protein 2	FBXO2	8	56454000	72026000	68776000	58454000	45788000	87605000	46898000	80415000	1.01954	0.918906
O43809	Cleavage and polyadenylation specificity factor subunit 5	NUDT21	9	55106000	50488000	45537000	51477000	58714000	61158000	67698000	61370000	1.22868	0.00593329
P78417	Glutathione S-transferase omega-1	GSTO1	14	81401000	98507000	106960000	110380000	116540000	124600000	127810000	112940000	1.21307	0.0365616
P46778	60S ribosomal protein L21	RPL21	13	92846000	90479000	95208000	110390000	104230000	106130000	92277000	112410000	1.06717	0.323315
P38606	V-type proton ATPase catalytic subunit A	ATP6V1A	20	107970000	99233000	106240000	97099000	100430000	108760000	108110000	89826000	0.991679	0.848195
Q9H1E3	Nuclear ubiquitous casein and cyclin-dependent kinase substrate 1	NUCKS1	5	10222000	13949000	12298000	8748300	6877800	9722600	2202700	12553000	0.693454	0.231533
P52701	DNA mismatch repair protein Msh6	MSH6	11	11488000	10475000	14322000	13119000	12857000	9072100	11733000	12117000	0.926627	0.482715
Q8WUY1	Protein THEM6	THEM6	5	10969000	14536000	9808000	11250000	13291000	10800000	12010000	12382000	1.04123	0.624207
Q8TB37	Iron-sulfur protein NUBPL	NUBPL	4	1375700	3488500	1430300	3156200	2761500	3295900	2496300	1925400	1.10882	0.544567
Q9Y5K5	Ubiquitin carboxyl-terminal hydrolase isozyme L5	UCHL5	4	3568200	5597400	5217000	0	3196300	4250600	4624700	4688000	0.873952	0.455377
Q9ULA0	Aspartyl aminopeptidase	DNPEP	9	25396000	20318000	21568000	25226000	22155000	20575000	26280000	22355000	0.987644	0.882124
Q9P2I0	Cleavage and polyadenylation specificity factor subunit 2	CPSF2	6	6190900	6892800	4852300	7459600	12734000	5442700	5858100	3651100	1.09018	0.971652
Q9H1B7	Interferon regulatory factor 2-binding protein-like	IRF2BPL	4	2783200	3601300	4055500	2713500	3085600	1795900	1085300	1505300	0.568069	0.0402105
Q15007	Pre-mRNA-splicing regulator WTAP	WTAP	2	0	1155700	1193500	1065100	1190300	815040	0	973460	0.872448	0.267794
Q6P1J9	Parafibromin	CDC73	1	404580	605910	828820	1338100	480140	289690	969840	418350	0.679176	0.313686
P04080	Cystatin-B	CSTB	5	40465000	29323000	26886000	44836000	55489000	35345000	64942000	31688000	1.32474	0.268313
Q13228	Selenium-binding protein 1	SELENBP1	8	23278000	18578000	14522000	24003000	18508000	13295000	20336000	13192000	0.812767	0.248769
Q14376	UDP-glucose 4-epimerase	GALE	12	22642000	23785000	27312000	38614000	47497000	32265000	35925000	15254000	1.16544	0.730431
Q8TDD1	ATP-dependent RNA helicase DDX54	DDX54	5	1557800	2144200	2110700	2489200	2310200	2657800	1859300	2210100	1.08859	0.487796
Q9UBL3	Set1/Ash2 histone methyltransferase complex subunit ASH2	ASH2L	2	1068300	1726600	1304700	907150	1295300	1113800	723590	1705200	0.966274	0.829231
O15431	High affinity copper uptake protein 1	SLC31A1	1	15960000	13855000	9544100	14282000	10740000	11703000	17759000	15412000	1.03678	0.845075
Q92841	Probable ATP-dependent RNA helicase DDX17	DDX17	23	132170000	163610000	139720000	114900000	123230000	135390000	107060000	155610000	0.947111	0.623333
P62314	Small nuclear ribonucleoprotein Sm D1	SNRPD1	2	14118000	11011000	12361000	36852000	23478000	13295000	20043000	9578900	0.893101	0.907081
O95218	Zinc finger Ran-binding domain-containing protein 2	ZRANB2	2	1619200	3041700	2787100	2443600	1832800	2125900	1535200	2940200	0.852653	0.44181
P61978	Heterogeneous nuclear ribonucleoprotein K	HNRNPK	35	497990000	668610000	612110000	557300000	483980000	506950000	534020000	561950000	0.893361	0.177671
P05198	Eukaryotic translation initiation factor 2 subunit 1	EIF2S1	7	23768000	28134000	18628000	14856000	20712000	19628000	19567000	25816000	1.00395	0.871654
Q9H9B4	Sideroflexin-1	SFXN1	12	22369000	26992000	23059000	29034000	21860000	27732000	27973000	32433000	1.08422	0.482153
P38646	Stress-70 protein, mitochondrial	HSPA9	62	2148900000	1648700000	1536200000	1597700000	1965500000	1525800000	1964200000	1724100000	1.03579	0.704057
O94903	Proline synthase co-transcribed bacterial homolog protein	PROSC	9	25834000	24194000	18359000	22924000	24876000	20213000	27743000	26977000	1.09307	0.418314
Q9NXA8	NAD-dependent protein deacylase sirtuin-5, mitochondrial	SIRT5	1	5145700	4114300	4003200	3196200	4622000	4392200	4351600	5483800	1.14522	0.239022
Q96IU4	Alpha/beta hydrolase domain-containing protein 14B	ABHD14B	8	52494000	41778000	52767000	69166000	63314000	64654000	90921000	54104000	1.26266	0.175677
Q16222	UDP-N-acetylhexosamine pyrophosphorylase;UDP-N-acetylgalactosamine pyrophosphorylase;UDP-N-acetylglucosamine pyrophosphorylase	UAP1	6	9830700	9042200	9177500	7218300	6920700	6292100	6567000	6927200	0.757244	0.00856169
P55209	Nucleosome assembly protein 1-like 1	NAP1L1	9	83166000	62346000	81806000	75566000	81746000	64398000	50509000	78250000	0.907618	0.431668
Q9BRX8	Redox-regulatory protein FAM213A	FAM213A	8	11258000	9641300	9955600	11717000	15957000	12235000	12292000	13287000	1.26306	0.0251641
P17931	Galectin-3	LGALS3	5	28821000	31306000	31466000	46775000	31563000	55838000	42087000	32674000	1.17196	0.413664
O75477	Erlin-1	ERLIN1	12	22577000	22894000	16576000	21372000	19925000	15944000	25313000	27449000	1.06248	0.756856
Q16204	Coiled-coil domain-containing protein 6	CCDC6	5	6282800	6500800	6284400	5363000	4215700	6417400	5434100	9350000	1.04037	0.998407
Q14554	Protein disulfide-isomerase A5	PDIA5	12	21975000	21810000	17875000	25928000	20114000	23736000	16987000	17326000	0.892394	0.332943
Q8IYB3	Serine/arginine repetitive matrix protein 1	SRRM1	4	2418900	3868700	2989800	2656400	2561600	1918600	2434900	3858000	0.902738	0.526642
P49903	Selenide, water dikinase 1	SEPHS1	8	18612000	21958000	21276000	20411000	18494000	23012000	19410000	17869000	0.957791	0.51496
Q92604	Acyl-CoA:lysophosphatidylglycerol acyltransferase 1	LPGAT1	1	0	0	0	0	617300	1191000	1279700	0	+inf	0
Q99536	Synaptic vesicle membrane protein VAT-1 homolog	VAT1	18	122530000	164710000	138270000	128970000	133910000	176920000	179560000	188740000	1.22481	0.0938694
P61927	60S ribosomal protein L37	RPL37	4	15123000	22759000	16700000	15872000	12120000	12971000	10420000	18487000	0.766429	0.120529
O75964	ATP synthase subunit g, mitochondrial	ATP5L	6	17361000	19872000	12569000	19635000	26476000	20172000	22668000	18173000	1.25998	0.126527
P41732	Tetraspanin-7	TSPAN7	2	1862500	1859300	1495900	1618500	1967300	2195600	2302900	2709900	1.34222	0.014413
P27348	14-3-3 protein theta	YWHAQ	21	197630000	199500000	200020000	186590000	198680000	235780000	219750000	234560000	1.13401	0.0282998
Q4G0N4	NAD kinase 2, mitochondrial	NADK2	6	6681000	3301800	0	0	6272200	4838100	5150000	5755400	1.10268	0.545057
P10606	Cytochrome c oxidase subunit 5B, mitochondrial	COX5B	5	16892000	16517000	16921000	16584000	18604000	16983000	19415000	13704000	1.02678	0.826922
O95202	LETM1 and EF-hand domain-containing protein 1, mitochondrial	LETM1	18	41976000	39611000	40632000	35686000	46620000	45449000	38503000	46389000	1.12068	0.0979449
P84077;P61204	ADP-ribosylation factor 1;ADP-ribosylation factor 3	ARF1;ARF3	4	16199000	11381000	10166000	14574000	16805000	14895000	10431000	15426000	1.1001	0.542689
O94925	Glutaminase kidney isoform, mitochondrial	GLS	20	81735000	110060000	143840000	97331000	94107000	148400000	113850000	132560000	1.12923	0.436487
P80303	Nucleobindin-2;Nesfatin-1	NUCB2	3	2995500	4422300	4577700	3636100	2795200	3645600	4624800	6101800	1.09825	0.742999
P16435	NADPH--cytochrome P450 reductase	POR	45	485230000	346600000	353290000	363260000	381640000	360910000	375840000	340630000	0.942288	0.565708
Q9Y2L1	Exosome complex exonuclease RRP44	DIS3	5	6966400	9634100	10143000	7151900	7480500	5162900	5027700	5042100	0.670097	0.0270499
O43390	Heterogeneous nuclear ribonucleoprotein R	HNRNPR	26	246780000	236240000	209440000	219360000	215830000	215710000	225730000	222540000	0.964894	0.411962
P48729	Casein kinase I isoform alpha	CSNK1A1	1	0	512700	0	335060	368740	449020	0	412350	0.967341	0.94125
Q96QK1	Vacuolar protein sorting-associated protein 35	VPS35	17	89587000	65382000	66629000	65516000	77928000	63809000	63671000	73500000	0.971419	0.807435
Q00577	Transcriptional activator protein Pur-alpha	PURA	4	9145500	6682300	7855800	7319600	6689500	5188400	7861400	3734500	0.757141	0.128007
Q9NS69	Mitochondrial import receptor subunit TOM22 homolog	TOMM22	2	0	625680	0	1257300	1555600	1070100	0	1077200	1.31101	0.37834
Q96RP9	Elongation factor G, mitochondrial	GFM1	8	21013000	21560000	24365000	21946000	22023000	22881000	24078000	23617000	1.0418	0.310336
Q9UBV8	Peflin	PEF1	2	1482100	1731800	5366800	6528800	3161200	4713300	3122500	1745500	0.843344	0.954836
O75886	Signal transducing adapter molecule 2	STAM2	1	2804800	0	2441800	2256900	0	2092600	4890100	1941400	1.18932	0.796129
P25786	Proteasome subunit alpha type-1	PSMA1	13	120460000	103060000	100680000	102430000	107550000	95362000	119360000	94340000	0.976518	0.723648
Q9UMR2	ATP-dependent RNA helicase DDX19B	DDX19B	2	3408800	3378300	3544600	4671900	2519800	2758000	2095900	2749200	0.674698	0.00809038
O00584	Ribonuclease T2	RNASET2	6	12719000	19383000	24468000	20121000	12318000	23726000	22225000	18405000	0.999778	0.985629
Q99613;B5ME19	Eukaryotic translation initiation factor 3 subunit C;Eukaryotic translation initiation factor 3 subunit C-like protein	EIF3C;EIF3CL	33	107790000	103820000	107890000	102760000	106550000	96512000	91737000	115300000	0.9712	0.554302
Q8NI37	Protein phosphatase PTC7 homolog	PPTC7	1	0	0	724760	1955300	1533200	572790	1801200	0	0.971916	0.973366
Q92552	28S ribosomal protein S27, mitochondrial	MRPS27	4	3607700	1948900	2037100	2097100	1875700	1451000	2022600	3978700	0.962562	0.771144
P00505	Aspartate aminotransferase, mitochondrial	GOT2	23	291630000	316810000	263520000	299600000	257780000	323360000	292390000	356250000	1.04969	0.602632
P61421	V-type proton ATPase subunit d 1	ATP6V0D1	3	4262900	3576100	5181600	4331200	6078100	3609000	8255800	3621500	1.24278	0.482953
Q15428	Splicing factor 3A subunit 2	SF3A2	9	34547000	33984000	31306000	27673000	29718000	23814000	30610000	33797000	0.924939	0.394303
P30419	Glycylpeptide N-tetradecanoyltransferase 1	NMT1	10	50656000	58377000	54187000	46158000	45675000	45575000	45578000	60405000	0.941995	0.487288
P02786	Transferrin receptor protein 1;Transferrin receptor protein 1, serum form	TFRC	28	191120000	145740000	156850000	140350000	160660000	131870000	116910000	145760000	0.875627	0.220318
P42785	Lysosomal Pro-X carboxypeptidase	PRCP	5	11131000	6748500	7413300	10563000	7168200	6609700	8899200	8152700	0.859827	0.379758
O76094	Signal recognition particle subunit SRP72	SRP72	9	14082000	18495000	14538000	14600000	10925000	17682000	11018000	16679000	0.912323	0.472208
P58546	Myotrophin	MTPN	3	26472000	10940000	14457000	19706000	18802000	18537000	29349000	15369000	1.14645	0.518926
Q9Y3D9	28S ribosomal protein S23, mitochondrial	MRPS23	5	5038100	8540900	6157900	8480000	9252500	12437000	7919600	8018200	1.3335	0.126711
O95831	Apoptosis-inducing factor 1, mitochondrial	AIFM1	22	91414000	77187000	81473000	88436000	91750000	77049000	95663000	76263000	1.00654	0.960848
O15511	Actin-related protein 2/3 complex subunit 5	ARPC5	5	13120000	15087000	14150000	14855000	20549000	15408000	20376000	10290000	1.16449	0.507086
P49368	T-complex protein 1 subunit gamma	CCT3	40	414380000	516720000	500820000	465050000	397210000	442620000	400610000	488270000	0.911301	0.226848
Q8NHH9	Atlastin-2	ATL2	6	16956000	14221000	12824000	15373000	13847000	12760000	15229000	15970000	0.973591	0.755636
O00541	Pescadillo homolog	PES1	13	38149000	33394000	29604000	30831000	33919000	31776000	27244000	38020000	0.992279	0.912989
Q9Y5B9	FACT complex subunit SPT16	SUPT16H	26	36554000	54531000	53061000	39880000	27896000	54267000	31205000	52571000	0.901715	0.532745
Q9BRF8	Serine/threonine-protein phosphatase CPPED1	CPPED1	10	83485000	82691000	105720000	92295000	87636000	98725000	106110000	86143000	1.0396	0.615243
Q96HC4	PDZ and LIM domain protein 5	PDLIM5	13	25550000	31270000	25112000	23372000	32620000	31156000	30468000	37113000	1.24741	0.0262363
P02760	Protein AMBP;Alpha-1-microglobulin;Inter-alpha-trypsin inhibitor light chain;Trypstatin	AMBP	4	7190800	5343200	7005400	5894100	8272100	7146800	6320700	5541500	1.07264	0.570862
Q13131;P54646	5-AMP-activated protein kinase catalytic subunit alpha-1;5-AMP-activated protein kinase catalytic subunit alpha-2	PRKAA1;PRKAA2	3	7805900	7972200	6746500	6172300	6784000	7854600	6731500	8841300	1.05278	0.591903
P82933	28S ribosomal protein S9, mitochondrial	MRPS9	4	0	2606700	3012100	3328200	3452300	2592900	2323400	3736400	1.01473	0.997282
P46109	Crk-like protein	CRKL	11	32644000	29559000	25170000	28557000	26150000	32530000	31838000	31479000	1.05233	0.510132
P68366	Tubulin alpha-4A chain	TUBA4A	2	8605900	6077400	7694400	7996100	10302000	4277500	11790000	9421500	1.17835	0.677812
Q15691	Microtubule-associated protein RP/EB family member 1	MAPRE1	16	138730000	170750000	140920000	131990000	156370000	154960000	146340000	134590000	1.01695	0.773043
P48728	Aminomethyltransferase, mitochondrial	AMT	2	847960	1069100	782450	1153300	731000	850920	760400	1348800	0.958033	0.724719
Q14157	Ubiquitin-associated protein 2-like	UBAP2L	10	16316000	9194600	18860000	16636000	18190000	16694000	11485000	15200000	1.00922	0.880115
Q96HE7	ERO1-like protein alpha	ERO1L	25	111660000	91349000	120880000	95537000	83061000	78175000	75612000	89038000	0.776981	0.0161787
Q9Y3U8	60S ribosomal protein L36	RPL36	8	47611000	79813000	60899000	52656000	48016000	82705000	60240000	60409000	1.04312	0.796782
P25787	Proteasome subunit alpha type-2	PSMA2	12	85296000	74223000	93912000	97915000	105860000	120750000	111540000	99500000	1.24564	0.0236077
P62258	14-3-3 protein epsilon	YWHAE	19	210050000	222240000	251880000	212580000	239860000	249060000	244090000	267240000	1.11542	0.0592861
Q9Y6M1	Insulin-like growth factor 2 mRNA-binding protein 2	IGF2BP2	21	69735000	79711000	76113000	67430000	70608000	72290000	67299000	77144000	0.980723	0.713514
P61981	14-3-3 protein gamma;14-3-3 protein gamma, N-terminally processed	YWHAG	18	96961000	122550000	139160000	100640000	109680000	158920000	125670000	150340000	1.18571	0.205269
P55265	Double-stranded RNA-specific adenosine deaminase	ADAR	13	22725000	21579000	22567000	22765000	15891000	20192000	14266000	16746000	0.748527	0.00683995
Q15274	Nicotinate-nucleotide pyrophosphorylase [carboxylating]	QPRT	11	39369000	55865000	46811000	53720000	41376000	55418000	61372000	51331000	1.07015	0.583135
P13073	Cytochrome c oxidase subunit 4 isoform 1, mitochondrial	COX4I1	7	21437000	24091000	23160000	22214000	20910000	19609000	23362000	34951000	1.08724	0.677144
Q49AR2	UPF0489 protein C5orf22	C5orf22	2	2051800	1374600	1041800	1218500	1483000	938990	1856000	2086000	1.1191	0.669471
Q99424	Peroxisomal acyl-coenzyme A oxidase 2	ACOX2	1	735060	1805400	865750	1456200	0	0	1624800	1242600	1.17942	0.535126
P26641	Elongation factor 1-gamma	EEF1G	27	418170000	433030000	444660000	405250000	371310000	429940000	479860000	461710000	1.02452	0.748601
Q9Y3B4	Splicing factor 3B subunit 6	SF3B6	7	8506900	8138900	14026000	17121000	12790000	17748000	21527000	10985000	1.31924	0.26692
Q8N766	ER membrane protein complex subunit 1	EMC1	9	10032000	5647800	11667000	14502000	15220000	9739200	11569000	7659500	1.05589	0.761743
Q96GD0	Pyridoxal phosphate phosphatase	PDXP	6	3532100	4776300	4230000	7120200	3997300	4931500	7759100	5781200	1.14297	0.522491
Q9UIJ7	GTP:AMP phosphotransferase AK3, mitochondrial	AK3	17	68290000	60006000	55368000	65059000	77966000	83950000	83565000	87717000	1.33963	0.00131862
P42765	3-ketoacyl-CoA thiolase, mitochondrial	ACAA2	27	206170000	222230000	201040000	226550000	235660000	218380000	215260000	242880000	1.06564	0.172492
P34913	Bifunctional epoxide hydrolase 2;Cytosolic epoxide hydrolase 2;Lipid-phosphate phosphatase	EPHX2	4	8289400	4197900	6337400	6965800	6219400	4188500	9304300	6071200	0.999725	0.962238
Q15717	ELAV-like protein 1	ELAVL1	19	130470000	131910000	129940000	121540000	144870000	150040000	180710000	155370000	1.22794	0.00814413
Q5T5P2	Sickle tail protein homolog	KIAA1217	3	615010	1155800	778740	766240	0	553860	0	1161700	1.03478	0.98486
Q01469	Fatty acid-binding protein, epidermal	FABP5	8	46839000	55118000	70131000	99211000	54211000	74006000	104520000	111450000	1.26866	0.345249
Q9H0W9	Ester hydrolase C11orf54	C11orf54	4	19684000	20203000	19159000	25218000	25125000	25397000	29664000	18448000	1.17054	0.251577
Q6P3X3	Tetratricopeptide repeat protein 27	TTC27	2	1301900	1423300	2287600	1554700	1060800	2112600	3556100	1293300	1.22159	0.720084
P62906	60S ribosomal protein L10a	RPL10A	18	250520000	255070000	276480000	295600000	330960000	317610000	344060000	332060000	1.22922	0.00243619
Q14258	E3 ubiquitin/ISG15 ligase TRIM25	TRIM25	11	18635000	18989000	17511000	17828000	16898000	14723000	17476000	19965000	0.946535	0.391818
Q9NZI8	Insulin-like growth factor 2 mRNA-binding protein 1	IGF2BP1	42	575360000	627060000	594220000	544010000	546970000	603590000	525840000	640070000	0.98967	0.829896
O75746	Calcium-binding mitochondrial carrier protein Aralar1	SLC25A12	1	1200800	765000	0	0	0	1346800	941020	1315400	1.22197	0.413815
P42677	40S ribosomal protein S27	RPS27	1	10028000	11167000	6370900	9058800	8979100	7998900	9599800	10677000	1.0172	0.818623
Q9BY43	Charged multivesicular body protein 4a	CHMP4A	4	3067000	5952000	2531700	2128400	3295800	4700800	3845300	6884600	1.36899	0.242853
P11117	Lysosomal acid phosphatase	ACP2	2	983980	1300600	0	1802100	945430	1592300	1511800	1587000	1.03443	0.846924
Q15021	Condensin complex subunit 1	NCAPD2	1	2784600	1523800	1289500	2029800	1135000	1361800	2161000	1262900	0.77621	0.314934
P17980	26S protease regulatory subunit 6A	PSMC3	21	89813000	89721000	112400000	110540000	84709000	99601000	100710000	103160000	0.964485	0.681263
O94973	AP-2 complex subunit alpha-2	AP2A2	7	6963100	8784800	9718000	7888500	8802300	8239500	8679700	7332300	0.990988	0.963468
Q9UNS2	COP9 signalosome complex subunit 3	COPS3	6	26895000	19406000	18902000	25391000	20039000	16508000	26673000	16696000	0.882133	0.392602
P50579	Methionine aminopeptidase 2	METAP2	6	18047000	17807000	12064000	18758000	21601000	18677000	20722000	15765000	1.15131	0.279101
P08708	40S ribosomal protein S17	RPS17	14	162020000	162260000	160310000	256850000	260070000	220180000	222350000	198940000	1.21593	0.149216
Q13363	C-terminal-binding protein 1	CTBP1	7	8753500	12175000	10931000	13986000	7428900	19299000	14235000	8739400	1.08413	0.928284
Q6PKG0	La-related protein 1	LARP1	10	14834000	26338000	20775000	18556000	16428000	15949000	12647000	16866000	0.768791	0.11938
P16403	Histone H1.2	HIST1H1C	2	4258100	2213900	303240	2999100	0	1530700	1032400	3202400	0.786481	0.996636
Q9UKG9	Peroxisomal carnitine O-octanoyltransferase	CROT	2	1638300	0	1957300	0	1277900	795070	1539300	1922200	0.769617	0.344127
P61758	Prefoldin subunit 3	VBP1	7	9787200	7681500	9394300	9573700	7664300	9601800	7706700	10496000	0.973436	0.753784
Q8WWC4	Uncharacterized protein C2orf47, mitochondrial	C2orf47	2	944700	806580	0	727360	0	1298500	933350	1496900	1.50435	0.0680427
Q92616	Translational activator GCN1	GCN1L1	55	105110000	139460000	132430000	99579000	121560000	170980000	130060000	128050000	1.15542	0.245946
P09234	U1 small nuclear ribonucleoprotein C	SNRPC	4	6376300	3997600	5358500	7394500	8756100	9074900	6015300	15326000	1.6938	0.0779079
O75947	ATP synthase subunit d, mitochondrial	ATP5H	15	131820000	82034000	97432000	119200000	146140000	121830000	173080000	117260000	1.29693	0.105382
Q86TS9	39S ribosomal protein L52, mitochondrial	MRPL52	3	1569300	1321400	1648600	1697200	1405300	2402400	2283000	0	1.30216	0.186441
P42330	Aldo-keto reductase family 1 member C3	AKR1C3	16	257180000	241440000	224840000	313390000	270100000	245540000	309020000	162610000	0.952182	0.677399
P50552	Vasodilator-stimulated phosphoprotein	VASP	9	11277000	15797000	13753000	12105000	13140000	16976000	14558000	14808000	1.12374	0.232455
Q16512	Serine/threonine-protein kinase N1	PKN1	1	0	705810	565000	0	562680	629040	615510	0	0.948072	0.642485
O00461	Golgi integral membrane protein 4	GOLIM4	6	7369900	9231600	8092200	8824400	7417700	6485700	7171800	8513900	0.88278	0.144869
O95671	N-acetylserotonin O-methyltransferase-like protein	ASMTL	3	2210000	2581900	2585500	2165100	3153400	2689800	2073900	3387800	1.18469	0.23796
P84103	Serine/arginine-rich splicing factor 3	SRSF3	10	242810000	221760000	199640000	280860000	231020000	205840000	244580000	281070000	1.01845	0.844526
P62081	40S ribosomal protein S7	RPS7	19	92631000	111630000	124650000	167360000	139570000	137690000	145350000	110640000	1.07451	0.539555
P16401	Histone H1.5	HIST1H1B	2	3572500	2378600	0	3798300	3269600	1814700	3038700	3120300	0.864922	0.494232
Q9H993	Protein-glutamate O-methyltransferase	ARMT1	4	4742400	5895300	5565300	5324600	4994100	4235600	5067300	5969400	0.941415	0.470629
P50225	Sulfotransferase 1A1	SULT1A1	6	85696000	112280000	113880000	121920000	107810000	101660000	113950000	73827000	0.915788	0.484467
P27487	Dipeptidyl peptidase 4;Dipeptidyl peptidase 4 membrane form;Dipeptidyl peptidase 4 soluble form	DPP4	18	79801000	46602000	59142000	48296000	68767000	54399000	66629000	56820000	1.05463	0.616613
O43252	Bifunctional 3-phosphoadenosine 5-phosphosulfate synthase 1;Sulfate adenylyltransferase;Adenylyl-sulfate kinase	PAPSS1	10	19021000	24529000	21405000	26467000	22139000	23273000	19351000	25898000	0.991676	0.952918
P54577	Tyrosine--tRNA ligase, cytoplasmic;Tyrosine--tRNA ligase, cytoplasmic, N-terminally processed	YARS	22	55716000	55701000	62896000	50515000	51305000	53464000	51933000	58736000	0.958235	0.478416
Q9UKM9	RNA-binding protein Raly	RALY	24	119550000	138300000	120870000	132630000	150410000	133090000	161160000	146920000	1.1569	0.0341388
P12081	Histidine--tRNA ligase, cytoplasmic	HARS	7	12520000	16022000	15250000	11687000	13999000	15297000	17865000	15078000	1.12185	0.239721
P0DP25;P0DP24;P0DP23	0	0	1	0	2145400	2723500	3137500	2756700	0	3094300	3411800	1.15692	0.291457
Q9HCC0	Methylcrotonoyl-CoA carboxylase beta chain, mitochondrial	MCCC2	22	75967000	78469000	87463000	74264000	75143000	78248000	79399000	75805000	0.976063	0.580465
Q9BWF3;Q9BQ04	RNA-binding protein 4;RNA-binding protein 4B	RBM4;RBM4B	8	20096000	25350000	24377000	24007000	20915000	24506000	15792000	24907000	0.91783	0.437166
P53396	ATP-citrate synthase	ACLY	64	548070000	537700000	589520000	533190000	575390000	516780000	536480000	543010000	0.983328	0.618049
P52815	39S ribosomal protein L12, mitochondrial	MRPL12	6	25291000	16648000	13529000	16004000	27573000	14512000	21869000	19903000	1.17328	0.422493
Q9H857	5-nucleotidase domain-containing protein 2	NT5DC2	5	2472600	1396200	3625900	2162200	2392400	3751900	3087100	2766600	1.24243	0.278567
P21912	Succinate dehydrogenase [ubiquinone] iron-sulfur subunit, mitochondrial	SDHB	2	3322500	3200000	4219400	5032600	3435700	4615400	5511400	4532800	1.14712	0.367891
Q16186	Proteasomal ubiquitin receptor ADRM1	ADRM1	6	13365000	15714000	12010000	11699000	10819000	14831000	8727700	17358000	0.980066	0.783335
Q9BV40	Vesicle-associated membrane protein 8	VAMP8	2	17050000	14465000	16701000	16492000	0	16663000	22199000	16417000	1.13905	0.246584
Q15075	Early endosome antigen 1	EEA1	46	81276000	59023000	69063000	66938000	101630000	72786000	64960000	85818000	1.17696	0.236047
P60866	40S ribosomal protein S20	RPS20	6	38316000	36347000	30195000	38027000	45961000	34561000	35778000	39931000	1.0934	0.343096
Q16718	NADH dehydrogenase [ubiquinone] 1 alpha subcomplex subunit 5	NDUFA5	2	1262300	0	0	1668100	1284800	0	1727600	0	1.02798	0.908726
Q8NBQ5	Estradiol 17-beta-dehydrogenase 11	HSD17B11	6	5371800	6751000	5959900	7065100	4163000	6725100	9178400	7818300	1.10884	0.71861
Q14019	Coactosin-like protein	COTL1	2	5114700	3003200	2891300	4007700	2785400	1841600	0	2211800	0.607209	0.0486607
P17858	ATP-dependent 6-phosphofructokinase, liver type	PFKL	14	46385000	51260000	52941000	55547000	56750000	44780000	56417000	46615000	0.992379	0.882151
P11498	Pyruvate carboxylase, mitochondrial	PC	46	223660000	249870000	254340000	215320000	210070000	233820000	201830000	239460000	0.938496	0.316349
P56378	6.8 kDa mitochondrial proteolipid	MP68	3	9059600	6124900	5303500	5354000	5416700	5672800	6647100	7298700	0.968783	0.926223
P33993	DNA replication licensing factor MCM7	MCM7	20	49303000	53858000	55934000	48014000	39335000	41946000	44769000	36733000	0.785977	0.0048907
P30040	Endoplasmic reticulum resident protein 29	ERP29	22	325280000	353220000	372490000	314050000	340310000	392960000	429310000	365410000	1.11937	0.128067
Q13510	Acid ceramidase;Acid ceramidase subunit alpha;Acid ceramidase subunit beta	ASAH1	3	3830700	855560	2850000	5577100	3387000	3075200	0	0	0.98559	0.778245
Q92734	Protein TFG	TFG	6	34622000	23588000	24305000	28592000	36461000	17909000	37415000	19844000	1.0047	0.860279
P39060	Collagen alpha-1(XVIII) chain;Endostatin	COL18A1	4	6641500	8614600	9039200	11621000	10636000	7137000	8318900	17277000	1.2075	0.53183
Q8N1G2	Cap-specific mRNA (nucleoside-2-O-)-methyltransferase 1	CMTR1	9	4819100	4769700	4571000	4608100	6231400	6301100	6539200	4931500	1.27895	0.0104939
O14737	Programmed cell death protein 5	PDCD5	2	12322000	8979700	5999100	6019000	8558300	4010600	4424400	5453200	0.673669	0.155372
Q9BVK6	Transmembrane emp24 domain-containing protein 9	TMED9	8	45393000	41786000	46636000	44923000	48041000	55513000	56784000	52477000	1.19065	0.00764668
O95674	Phosphatidate cytidylyltransferase 2	CDS2	1	4105100	2607300	4111000	2109800	0	3477500	0	3114400	1.01938	0.828871
Q9NXF1	Testis-expressed sequence 10 protein	TEX10	3	4930700	3327000	7487400	3570100	2235100	6142800	2438500	1367400	0.630788	0.171729
P61604	10 kDa heat shock protein, mitochondrial	HSPE1	21	1100600000	790970000	711380000	1189600000	1115200000	888100000	1308100000	751260000	1.07122	0.704183
Q15165	Serum paraoxonase/arylesterase 2	PON2	4	55240000	53873000	44878000	54224000	45702000	46086000	56567000	66362000	1.03123	0.836566
P43307	Translocon-associated protein subunit alpha	SSR1	4	34320000	36922000	32921000	27881000	28290000	34531000	34619000	36834000	1.01689	0.842529
P48637	Glutathione synthetase	GSS	18	112780000	115450000	129020000	129640000	117800000	126200000	133460000	113290000	1.00793	0.883113
P01009	Alpha-1-antitrypsin;Short peptide from AAT	SERPINA1	19	81692000	70146000	78942000	73835000	57954000	63138000	59406000	67537000	0.814257	0.00532552
Q9NUQ9	Protein FAM49B	FAM49B	7	15511000	15056000	12948000	14110000	14158000	13417000	15186000	16940000	1.03603	0.616694
P50897	Palmitoyl-protein thioesterase 1	PPT1	7	21761000	16602000	30889000	24149000	26366000	18482000	19849000	21286000	0.920579	0.668817
Q14240	Eukaryotic initiation factor 4A-II;Eukaryotic initiation factor 4A-II, N-terminally processed	EIF4A2	6	22522000	30464000	20489000	23348000	24024000	26295000	23745000	34541000	1.12169	0.384905
Q13825	Methylglutaconyl-CoA hydratase, mitochondrial	AUH	2	3570500	2409800	0	4644500	3920300	5016700	6726300	4551500	1.42695	0.135935
Q99829	Copine-1	CPNE1	13	109260000	120590000	105400000	103880000	91754000	95388000	89792000	122570000	0.909762	0.251071
Q9BUF5	Tubulin beta-6 chain	TUBB6	6	17845000	16185000	25246000	24525000	27620000	33733000	14231000	24286000	1.19175	0.521192
Q53FA7	Quinone oxidoreductase PIG3	TP53I3	4	6310000	13679000	9491600	10526000	6588700	21089000	9572500	6018800	1.08155	0.956593
Q08623	Pseudouridine-5-phosphatase	HDHD1	2	0	1885200	1151000	3407100	1887500	548790	2187300	0	0.717581	0.505147
P61224;P62834;A6NIZ1	Ras-related protein Rap-1b;Ras-related protein Rap-1A;Ras-related protein Rap-1b-like protein	RAP1B;RAP1A	7	11371000	9697300	16947000	30337000	21484000	30574000	59350000	17887000	1.8916	0.137964
A6NDG6	Phosphoglycolate phosphatase	PGP	6	2470600	1592200	2704100	7452100	2559800	2920100	3996900	2572000	0.847373	0.982636
Q9NZC3	Glycerophosphodiester phosphodiesterase 1	GDE1	2	732670	0	626620	837190	626860	889050	1257900	1413300	1.42971	0.224191
O14980	Exportin-1	XPO1	29	127160000	76909000	131230000	111200000	129940000	102190000	114660000	97245000	0.994482	0.949256
Q96PK6	RNA-binding protein 14	RBM14	13	24319000	33108000	25011000	26680000	24780000	25280000	25376000	36872000	1.02923	0.860443
Q96H20	Vacuolar-sorting protein SNF8	SNF8	1	0	0	0	0	1621400	0	2633000	2931200	+inf	0
Q14914	Prostaglandin reductase 1	PTGR1	6	3635000	3658700	2001000	4308800	2313600	5824500	2755100	4084200	1.101	0.802065
Q6P996	Pyridoxal-dependent decarboxylase domain-containing protein 1	PDXDC1	21	45310000	51628000	61360000	37606000	40593000	40163000	34829000	49370000	0.84202	0.240808
Q9Y2S7	Polymerase delta-interacting protein 2	POLDIP2	7	8892900	12688000	9618700	8799300	7654200	14824000	12859000	10460000	1.14496	0.509165
Q9BT78	COP9 signalosome complex subunit 4	COPS4	8	17693000	16262000	19313000	18425000	16243000	28933000	25152000	25569000	1.33761	0.0851984
P00492	Hypoxanthine-guanine phosphoribosyltransferase	HPRT1	8	31552000	19196000	28781000	34468000	29586000	39789000	26475000	35775000	1.15464	0.367252
P78509	Reelin	RELN	7	11024000	14706000	13015000	8362100	14356000	16414000	12830000	17316000	1.29314	0.0993913
Q9BX68	Histidine triad nucleotide-binding protein 2, mitochondrial	HINT2	3	33057000	9488000	43931000	32820000	33653000	23426000	35496000	11944000	0.876132	0.864416
P13693	Translationally-controlled tumor protein	TPT1	6	22467000	21409000	28506000	29407000	30001000	36637000	31816000	31420000	1.27591	0.0341545
Q13867	Bleomycin hydrolase	BLMH	3	6325000	4391700	7571500	8386000	5152700	8238900	5111000	5103500	0.884979	0.553163
Q7Z4W1	L-xylulose reductase	DCXR	12	58033000	54891000	57083000	67800000	66131000	68521000	76925000	78591000	1.22018	0.0192285
P16278	Beta-galactosidase	GLB1	7	18974000	12568000	35652000	26184000	19951000	30963000	17129000	18589000	0.927756	0.90897
Q99459	Cell division cycle 5-like protein	CDC5L	15	20469000	30823000	26950000	21447000	21347000	31477000	26544000	31304000	1.11017	0.45363
P25685	DnaJ homolog subfamily B member 1	DNAJB1	11	26077000	33879000	33396000	31057000	23384000	26836000	30469000	33668000	0.919202	0.408007
P19784	Casein kinase II subunit alpha	CSNK2A2	3	2561800	3304100	1900200	4778500	1247200	2965500	4473500	0	0.923234	0.716671
Q13283	Ras GTPase-activating protein-binding protein 1	G3BP1	16	123830000	103060000	103800000	116330000	107360000	99311000	111380000	114900000	0.968527	0.59859
P48047	ATP synthase subunit O, mitochondrial	ATP5O	13	115900000	109970000	92955000	155070000	151020000	138970000	174020000	182660000	1.36458	0.0404062
Q99624	Sodium-coupled neutral amino acid transporter 3	SLC38A3	3	2740700	0	1234500	1767600	1877000	1031700	1263500	1008000	0.676525	0.20949
Q15417	Calponin-3	CNN3	8	21917000	22496000	17626000	13546000	28782000	24627000	26075000	32420000	1.48051	0.0218116
Q9NRN7	L-aminoadipate-semialdehyde dehydrogenase-phosphopantetheinyl transferase	AASDHPPT	3	4089700	8273600	4845000	4773400	5600000	5780700	6098600	8104200	1.16385	0.347992
P10515	Dihydrolipoyllysine-residue acetyltransferase component of pyruvate dehydrogenase complex, mitochondrial	DLAT	11	47855000	37370000	42824000	36059000	42909000	39688000	37698000	40766000	0.981433	0.855037
P08865	40S ribosomal protein SA	RPSA	16	598210000	673530000	550110000	773860000	736460000	587780000	715730000	549530000	0.997608	0.986307
P63104	14-3-3 protein zeta/delta	YWHAZ	16	223790000	269300000	286900000	264480000	238330000	268480000	283030000	225080000	0.971708	0.713811
Q02878	60S ribosomal protein L6	RPL6	23	202020000	189180000	155020000	243640000	233470000	212510000	324920000	234020000	1.27228	0.118095
P50914	60S ribosomal protein L14	RPL14	16	63620000	84330000	75749000	83867000	75299000	85874000	73989000	82995000	1.03443	0.629939
P07737	Profilin-1	PFN1	12	324520000	252990000	296060000	382640000	436870000	392000000	382240000	278290000	1.18563	0.243571
Q14204	Cytoplasmic dynein 1 heavy chain 1	DYNC1H1	118	181830000	325280000	267000000	185830000	206750000	337760000	313740000	378860000	1.28874	0.228737
P49959	Double-strand break repair protein MRE11A	MRE11A	5	1384700	1996200	1944900	1796900	917980	4216700	2731000	0	1.47242	0.600484
O75844	CAAX prenyl protease 1 homolog	ZMPSTE24	5	11110000	7900500	5788400	8260300	6967900	3809000	8332500	7489200	0.804575	0.332753
Q15836;P63027	Vesicle-associated membrane protein 3;Vesicle-associated membrane protein 2	VAMP3;VAMP2	5	33014000	15878000	22272000	21569000	22872000	18807000	17463000	17730000	0.828961	0.364773
Q9NX40	OCIA domain-containing protein 1	OCIAD1	1	0	558980	622760	1541100	1443000	1510100	942540	896900	1.32009	0.303539
Q5T6F2	Ubiquitin-associated protein 2	UBAP2	2	0	705280	0	0	538710	599950	0	0	1	1
Q9Y2W1	Thyroid hormone receptor-associated protein 3	THRAP3	26	72505000	65248000	51660000	56232000	60030000	48249000	55828000	74360000	0.970779	0.785935
Q9P0L0	Vesicle-associated membrane protein-associated protein A	VAPA	16	85031000	81185000	80358000	76445000	69949000	80538000	73981000	85592000	0.959882	0.41828
Q13616	Cullin-1	CUL1	7	9218300	7470900	7459800	5617800	6075100	5008500	7055200	6027600	0.811858	0.155518
P15144	Aminopeptidase N	ANPEP	15	47842000	29726000	33542000	34038000	41550000	30226000	32746000	28559000	0.916864	0.56036
P52895	Aldo-keto reductase family 1 member C2	AKR1C2	3	36200000	25137000	18157000	90924000	44243000	36356000	38980000	26557000	0.857515	0.946019
O15212	Prefoldin subunit 6	PFDN6	3	5749400	4327900	4682100	7829000	9288000	5828000	7641400	3018600	1.14112	0.787627
P46087	Probable 28S rRNA (cytosine(4447)-C(5))-methyltransferase	NOP2	20	66905000	60816000	55588000	58755000	51955000	62918000	68127000	77913000	1.07787	0.501253
O95081	Arf-GAP domain and FG repeat-containing protein 2	AGFG2	5	8179200	7846100	8131700	7854600	7149000	6623400	4605800	7883000	0.820365	0.11465
P63241;Q9GZV4;Q6IS14	Eukaryotic translation initiation factor 5A-1;Eukaryotic translation initiation factor 5A-2;Eukaryotic translation initiation factor 5A-1-like	EIF5A;EIF5A2;EIF5AL1	11	93163000	96236000	74833000	81053000	114420000	96231000	98941000	90000000	1.15728	0.107038
P30048	Thioredoxin-dependent peroxide reductase, mitochondrial	PRDX3	17	283480000	269480000	320030000	414390000	385360000	420790000	427350000	344860000	1.22602	0.0940791
Q15785	Mitochondrial import receptor subunit TOM34	TOMM34	10	21933000	23074000	20680000	18346000	20675000	21275000	15460000	17113000	0.88683	0.218116
P49773	Histidine triad nucleotide-binding protein 1	HINT1	6	165810000	126130000	119030000	234770000	140370000	133400000	175790000	86440000	0.830055	0.434113
P54578	Ubiquitin carboxyl-terminal hydrolase 14	USP14	16	37370000	38137000	41626000	40753000	28399000	39026000	35460000	25874000	0.815519	0.0709202
Q15149	Plectin	PLEC	34	15612000	27953000	11368000	9610800	27946000	31436000	50922000	44048000	2.39143	0.0145546
P53990	IST1 homolog	IST1	11	23546000	31756000	27262000	31999000	26139000	30790000	24874000	31190000	0.986296	0.909923
A9YTQ3	Aryl hydrocarbon receptor repressor	AHRR	2	8266600	7186400	0	8057700	7162600	6702100	6938700	8781300	0.943763	0.476614
Q9BTV4	Transmembrane protein 43	TMEM43	3	2196500	3017200	2658700	2968600	3069800	2151500	3592700	4169900	1.19767	0.356876
Q9BZE9	Tether containing UBX domain for GLUT4	ASPSCR1	13	46838000	45101000	37700000	33669000	41224000	30051000	28290000	39951000	0.854312	0.23709
P22570	NADPH:adrenodoxin oxidoreductase, mitochondrial	FDXR	30	240920000	265060000	243270000	265290000	260970000	249110000	224150000	240230000	0.960494	0.363805
P16422	Epithelial cell adhesion molecule	EPCAM	7	10622000	10016000	7460000	7139500	7692600	6690400	9023800	6754500	0.855943	0.274316
P18669;Q8N0Y7	Phosphoglycerate mutase 1;Probable phosphoglycerate mutase 4	PGAM1;PGAM4	28	573150000	556920000	676550000	642630000	631670000	791620000	789620000	679600000	1.18098	0.0641466
P09382	Galectin-1	LGALS1	5	35923000	26871000	36460000	33724000	33864000	39043000	32037000	36143000	1.06098	0.469657
Q9UBC2	Epidermal growth factor receptor substrate 15-like 1	EPS15L1	11	19316000	10017000	19122000	14246000	25888000	20100000	18989000	11984000	1.22743	0.399318
O75208	Ubiquinone biosynthesis protein COQ9, mitochondrial	COQ9	6	4603800	12775000	4359600	7389200	3941500	3098500	4593800	6581600	0.625366	0.21613
Q9Y305	Acyl-coenzyme A thioesterase 9, mitochondrial	ACOT9	5	6856300	5897400	4708200	5208800	7562000	4683100	8450000	3234400	1.05553	0.980404
P33316	Deoxyuridine 5-triphosphate nucleotidohydrolase, mitochondrial	DUT	6	8592800	5571400	7545200	6052700	7840400	5597700	4042100	6449500	0.861956	0.38131
P35237	Serpin B6	SERPINB6	9	22717000	25721000	25181000	24106000	18089000	34195000	22092000	21746000	0.983597	0.759085
Q9Y3I0	tRNA-splicing ligase RtcB homolog	RTCB	17	112450000	107700000	105020000	106780000	108510000	97025000	84871000	102960000	0.910675	0.126414
Q9H6Z4	Ran-binding protein 3	RANBP3	2	6616300	19606000	12101000	9414700	12392000	12024000	7542900	12265000	0.926388	0.948483
Q16881	Thioredoxin reductase 1, cytoplasmic	TXNRD1	10	23835000	23468000	30952000	27574000	32448000	30133000	26781000	22836000	1.06018	0.596686
P15924	Desmoplakin	DSP	76	88811000	140330000	130500000	84885000	111580000	159920000	126060000	173520000	1.28469	0.166449
P34896	Serine hydroxymethyltransferase, cytosolic	SHMT1	8	9250800	12944000	7028100	9057900	8398800	11471000	13691000	5817800	1.02868	0.994344
Q9H8H3	Methyltransferase-like protein 7A	METTL7A	4	10424000	10043000	12379000	17547000	13072000	13934000	23002000	12560000	1.2416	0.311807
Q9GZZ9	Ubiquitin-like modifier-activating enzyme 5	UBA5	4	6392700	5239700	5586800	8118600	4728400	7643200	7319000	5694300	1.00186	0.98886
P27361	Mitogen-activated protein kinase 3	MAPK3	8	21553000	21064000	15166000	19594000	16820000	14287000	17133000	20229000	0.884875	0.304788
P30740	Leukocyte elastase inhibitor	SERPINB1	14	61549000	66081000	55434000	62774000	48738000	74749000	68066000	87728000	1.13604	0.438153
O60701	UDP-glucose 6-dehydrogenase	UGDH	53	1391800000	1522600000	1617400000	1566300000	1196400000	1377900000	1306100000	1503900000	0.882947	0.0714523
Q99497	Protein deglycase DJ-1	PARK7	16	182560000	114880000	111540000	135910000	199990000	128570000	147190000	164300000	1.17464	0.296063
O15371	Eukaryotic translation initiation factor 3 subunit D	EIF3D	13	38553000	35355000	27827000	28741000	32224000	27284000	33323000	36311000	0.989776	0.952972
P33991	DNA replication licensing factor MCM4	MCM4	13	23775000	20627000	26070000	26965000	19967000	16627000	18400000	24437000	0.815204	0.0843414
Q9H7B2	Ribosome production factor 2 homolog	RPF2	2	3633600	3991700	3351400	3767300	3366600	3382800	4038900	5479900	1.10338	0.530639
Q99623	Prohibitin-2	PHB2	16	51270000	92721000	67667000	57937000	46004000	77827000	77223000	91753000	1.0861	0.709288
O00203	AP-3 complex subunit beta-1	AP3B1	9	15848000	8274900	16048000	8182100	10910000	11452000	13555000	7149700	0.890673	0.720279
Q8N6T3	ADP-ribosylation factor GTPase-activating protein 1	ARFGAP1	4	16731000	19657000	16347000	16271000	13072000	11769000	7608400	12723000	0.654616	0.0163643
Q9NVP1	ATP-dependent RNA helicase DDX18	DDX18	18	73574000	88018000	67520000	60236000	64617000	78600000	72735000	68070000	0.981593	0.902335
Q9NWH9	SAFB-like transcription modulator	SLTM	2	867580	1187700	1039900	754940	831580	0	857900	512110	0.762432	0.182781
P19823	Inter-alpha-trypsin inhibitor heavy chain H2	ITIH2	13	85599000	78252000	67020000	74225000	65784000	57347000	76895000	65663000	0.870837	0.126351
Q9Y6I3	Epsin-1	EPN1	4	3179900	2315600	1828200	1867700	1052800	3012800	1127700	1879700	0.769524	0.279159
Q96KP4	Cytosolic non-specific dipeptidase	CNDP2	19	106610000	103360000	118280000	117920000	118010000	117330000	108600000	108350000	1.01372	0.739299
Q14108	Lysosome membrane protein 2	SCARB2	3	6535900	3764700	6202200	3902800	13448000	7118300	6687200	10079000	1.82952	0.0347867
P49589	Cysteine--tRNA ligase, cytoplasmic	CARS	10	17190000	19289000	16595000	17689000	16513000	16269000	20806000	19613000	1.03445	0.683608
P04843	Dolichyl-diphosphooligosaccharide--protein glycosyltransferase subunit 1	RPN1	48	623920000	584200000	595570000	489500000	483560000	504040000	497060000	472740000	0.853571	0.0308148
Q9UKV3	Apoptotic chromatin condensation inducer in the nucleus	ACIN1	24	37675000	42905000	42710000	37283000	30961000	32571000	28659000	28245000	0.750039	0.00134308
Q70UQ0	Inhibitor of nuclear factor kappa-B kinase-interacting protein	IKBIP	7	13894000	23880000	19908000	12782000	12883000	16880000	20795000	16973000	0.958376	0.897646
Q15056	Eukaryotic translation initiation factor 4H	EIF4H	5	8040900	10710000	8049700	10503000	11286000	7589100	7977000	7588700	0.923257	0.521524
P51114	Fragile X mental retardation syndrome-related protein 1	FXR1	5	4785300	5519600	5254400	4497200	4191300	3736000	4258600	7632700	0.988139	0.770731
P53007	Tricarboxylate transport protein, mitochondrial	SLC25A1	10	10575000	15750000	13693000	18877000	11987000	20772000	19353000	18688000	1.20214	0.331285
Q13123	Protein Red	IK	3	3549800	6977700	6012900	4301900	4486700	7672600	4090400	5911900	1.0633	0.765545
Q9NQ29	Putative RNA-binding protein Luc7-like 1	LUC7L	3	1785100	3801800	3569200	1714400	1723200	2519400	1438800	3450400	0.840053	0.5936
O95573	Long-chain-fatty-acid--CoA ligase 3	ACSL3	29	145760000	135720000	126280000	155980000	116480000	102080000	120270000	114260000	0.803722	0.00942349
Q92804	TATA-binding protein-associated factor 2N	TAF15	10	45772000	51463000	47330000	37814000	44148000	41695000	33010000	52930000	0.941901	0.58458
P05534;P30447	HLA class I histocompatibility antigen, A-24 alpha chain;HLA class I histocompatibility antigen, A-23 alpha chain	HLA-A	3	9275400	5989300	5837200	8912700	8619100	4464900	8623100	6354500	0.934932	0.707293
P78540	Arginase-2, mitochondrial	ARG2	3	3194300	7936300	5838800	5201600	6304800	6924900	6416200	6986200	1.20121	0.267561
Q969H8	Myeloid-derived growth factor	MYDGF	4	5146600	3411000	4532900	4553200	5671800	5098400	6796500	4590000	1.25579	0.108142
Q02127	Dihydroorotate dehydrogenase (quinone), mitochondrial	DHODH	2	2137800	2618000	2498800	2778300	1865200	3314800	3395000	2448700	1.09876	0.662231
P62310	U6 snRNA-associated Sm-like protein LSm3	LSM3	3	18349000	10031000	12737000	22339000	21111000	19241000	22890000	12894000	1.19982	0.383465
Q6NUM9	All-trans-retinol 13,14-reductase	RETSAT	9	12839000	8830700	10195000	11364000	8971800	8770300	12457000	11787000	0.971255	0.799449
P23528	Cofilin-1	CFL1	16	235360000	212630000	232970000	279650000	318600000	283290000	263760000	295090000	1.20834	0.0327473
P36507	Dual specificity mitogen-activated protein kinase kinase 2	MAP2K2	5	4531800	4963100	4591300	4320300	4853200	4372800	6150200	5786900	1.14976	0.166847
Q8WYA6	Beta-catenin-like protein 1	CTNNBL1	11	12668000	15897000	17792000	18504000	20696000	28913000	17523000	13969000	1.25038	0.301173
Q96HV5	Transmembrane protein 41A	TMEM41A	3	1205000	0	0	1344700	2091400	1042300	1666800	839580	1.10603	0.911263
P00441	Superoxide dismutase [Cu-Zn]	SOD1	15	373960000	312350000	326330000	426000000	385770000	324080000	358470000	337240000	0.977006	0.829838
P51572	B-cell receptor-associated protein 31	BCAP31	21	186300000	131180000	145820000	169300000	129110000	113290000	151470000	149240000	0.858536	0.196795
Q92878	DNA repair protein RAD50	RAD50	13	17556000	10590000	13110000	12743000	15735000	11524000	17427000	14601000	1.09793	0.49609
O95881	Thioredoxin domain-containing protein 12	TXNDC12	10	49228000	36010000	46392000	56632000	48297000	48936000	45479000	35207000	0.945061	0.685088
P46940	Ras GTPase-activating-like protein IQGAP1	IQGAP1	34	100310000	88744000	88749000	60251000	101690000	106780000	95870000	101450000	1.20037	0.128396
P17812	CTP synthase 1	CTPS1	7	21432000	25998000	28086000	24381000	19720000	16048000	17243000	19349000	0.724346	0.00525521
P46939	Utrophin	UTRN	57	118920000	129680000	99399000	105940000	117930000	108270000	133350000	119380000	1.05505	0.471739
P07954	Fumarate hydratase, mitochondrial	FH	17	164900000	153290000	154450000	187220000	140280000	158520000	168380000	161210000	0.952308	0.459823
P40763	Signal transducer and activator of transcription 3	STAT3	23	85098000	58489000	59574000	61862000	78671000	68984000	74021000	74507000	1.11757	0.233179
P28482	Mitogen-activated protein kinase 1	MAPK1	10	70305000	72136000	54153000	70788000	61259000	73454000	103150000	75062000	1.17033	0.297779
O15126	Secretory carrier-associated membrane protein 1	SCAMP1	2	9275000	9834600	9333600	8868700	7048700	11180000	8437700	10487000	0.995752	0.859346
P32322	Pyrroline-5-carboxylate reductase 1, mitochondrial	PYCR1	18	169340000	224010000	172320000	168230000	170970000	184970000	195990000	213940000	1.04356	0.596954
P06744	Glucose-6-phosphate isomerase	GPI	25	501090000	496740000	482380000	484680000	345110000	358090000	453870000	388960000	0.786828	0.00722561
P53801	Pituitary tumor-transforming gene 1 protein-interacting protein	PTTG1IP	2	5630400	6032200	0	5877700	4811800	6166800	4928100	4807800	0.885725	0.145072
Q15061	WD repeat-containing protein 43	WDR43	8	14289000	14566000	14290000	13355000	14031000	14367000	13658000	18555000	1.07276	0.424386
P15374	Ubiquitin carboxyl-terminal hydrolase isozyme L3	UCHL3	7	34683000	30611000	31017000	35595000	38751000	43144000	46092000	41786000	1.28708	0.00300001
P46783	40S ribosomal protein S10	RPS10	13	56687000	64343000	82652000	79384000	69376000	71313000	58746000	94148000	1.03715	0.80842
Q7L2E3	Putative ATP-dependent RNA helicase DHX30	DHX30	7	10387000	11927000	9596600	8682900	9146900	8997500	12468000	9238200	0.981699	0.842861
P13489	Ribonuclease inhibitor	RNH1	19	73811000	86686000	88639000	72488000	67919000	88745000	66838000	97521000	0.998131	0.920303
Q15493	Regucalcin	RGN	2	3614800	3816600	3922300	7531300	3425500	3938800	6629800	2915400	0.895393	0.668628
P06756	Integrin alpha-V;Integrin alpha-V heavy chain;Integrin alpha-V light chain	ITGAV	10	29291000	21499000	28542000	28264000	35544000	27689000	24647000	31629000	1.11072	0.375334
Q15459	Splicing factor 3A subunit 1	SF3A1	21	108240000	112260000	91729000	102040000	95554000	98397000	73250000	101020000	0.888845	0.205317
P07942	Laminin subunit beta-1	LAMB1	12	15902000	20685000	24172000	11819000	11205000	21680000	14295000	16952000	0.883629	0.597349
P52565	Rho GDP-dissociation inhibitor 1	ARHGDIA	13	138320000	158660000	161260000	146430000	148410000	189930000	161490000	165200000	1.09982	0.186854
P26196	Probable ATP-dependent RNA helicase DDX6	DDX6	8	35354000	36443000	23873000	23480000	25233000	29783000	29198000	31453000	0.970768	0.932898
O60826	Coiled-coil domain-containing protein 22	CCDC22	3	1492200	1921100	2603000	5368800	4290700	0	1089800	1436600	0.798365	0.574771
P11717	Cation-independent mannose-6-phosphate receptor	IGF2R	43	77668000	103850000	97614000	73635000	85558000	115700000	89821000	117600000	1.1585	0.259365
Q9BU23	Lipase maturation factor 2	LMF2	3	4024900	4016600	2281400	3271300	4034000	2366500	4259000	5301800	1.17413	0.528887
Q9HC38	Glyoxalase domain-containing protein 4	GLOD4	11	35732000	34094000	34353000	30039000	28400000	38497000	40257000	35561000	1.06331	0.548402
Q6NXS1;P41236	Protein phosphatase inhibitor 2-like protein 3;Protein phosphatase inhibitor 2	PPP1R2P3;PPP1R2	3	726780	3044500	2622500	747250	967970	1678900	700810	3148200	0.909656	0.928798
P05026	Sodium/potassium-transporting ATPase subunit beta-1	ATP1B1	9	162790000	112720000	121900000	137420000	127370000	105790000	131130000	126450000	0.917563	0.42754
P30085	UMP-CMP kinase	CMPK1	11	68901000	52936000	56004000	56499000	75854000	72618000	56623000	61056000	1.13575	0.214925
O00567	Nucleolar protein 56	NOP56	30	143690000	142160000	107860000	130150000	129260000	108530000	133670000	139540000	0.975451	0.799705
O95394	Phosphoacetylglucosamine mutase	PGM3	17	60441000	60356000	65594000	56398000	51400000	60082000	54621000	57504000	0.920993	0.120681
Q69YN2	CWF19-like protein 1	CWF19L1	2	1402700	4031600	2899800	2759300	4022800	2079000	2791000	3696900	1.13488	0.568017
P37108	Signal recognition particle 14 kDa protein	SRP14	11	54010000	52824000	46563000	71132000	69280000	72250000	76792000	61482000	1.24618	0.0634598
Q9Y5Z4	Heme-binding protein 2	HEBP2	4	5338500	4749200	6527700	5354500	4099200	6326700	5008700	6792200	1.01169	0.993666
Q9BY77	Polymerase delta-interacting protein 3	POLDIP3	9	13659000	13125000	11447000	11590000	11135000	7758300	7633500	12757000	0.788499	0.106073
P30084	Enoyl-CoA hydratase, mitochondrial	ECHS1	15	76356000	67419000	90541000	94494000	102440000	98291000	102800000	85685000	1.18371	0.0968944
Q16775	Hydroxyacylglutathione hydrolase, mitochondrial	HAGH	11	25375000	26036000	19453000	24946000	25332000	19670000	25172000	21035000	0.951978	0.619661
Q7Z4H8	KDEL motif-containing protein 2	KDELC2	3	4487200	7919100	4943000	6043200	4056600	2025900	3047000	3724900	0.549509	0.02247
P98175	RNA-binding protein 10	RBM10	3	5088700	3649000	2947600	5525900	4836200	3178600	3038600	4971900	0.931097	0.749068
P15289	Arylsulfatase A;Arylsulfatase A component B;Arylsulfatase A component C	ARSA	3	0	0	3753400	0	0	0	5130000	0	1.36676	1
Q9H0S4	Probable ATP-dependent RNA helicase DDX47	DDX47	6	15808000	16537000	12156000	15186000	14661000	16507000	10516000	20217000	1.03709	0.920013
Q14318	Peptidyl-prolyl cis-trans isomerase FKBP8	FKBP8	4	5582900	8830900	8822700	6215700	5967300	6695600	5338700	4740900	0.772183	0.129519
Q9H553	Alpha-1,3/1,6-mannosyltransferase ALG2	ALG2	2	3015300	4536200	0	3588800	2910600	0	3029300	0	0.799785	0.265546
Q01581	Hydroxymethylglutaryl-CoA synthase, cytoplasmic	HMGCS1	20	120090000	96709000	113860000	132070000	115390000	106470000	121810000	86428000	0.929481	0.479817
P46459	Vesicle-fusing ATPase	NSF	13	44137000	40966000	42438000	40264000	40413000	42174000	39654000	43558000	0.988046	0.694866
Q9H3K6	BolA-like protein 2	BOLA2	1	4410200	2944100	2765700	3021000	6889900	3340700	4546900	2129100	1.28655	0.529146
P05362	Intercellular adhesion molecule 1	ICAM1	13	71174000	72167000	69307000	65356000	56134000	54992000	52116000	69092000	0.835722	0.0305759
Q96EY7	Pentatricopeptide repeat domain-containing protein 3, mitochondrial	PTCD3	11	23015000	16538000	19811000	25507000	19500000	23108000	23761000	21559000	1.03602	0.676431
Q8NCN5	Pyruvate dehydrogenase phosphatase regulatory subunit, mitochondrial	PDPR	5	0	2824000	3804700	0	1923700	2664400	2718300	2584800	0.746089	0.128319
P49247	Ribose-5-phosphate isomerase	RPIA	5	12262000	14079000	13489000	11764000	13395000	15743000	13313000	13575000	1.0859	0.202142
Q9BZE1	39S ribosomal protein L37, mitochondrial	MRPL37	2	0	1322900	0	0	0	1763400	1146900	1019100	0.990098	1
P23193	Transcription elongation factor A protein 1	TCEA1	14	40691000	36997000	25235000	23715000	42034000	26723000	38753000	41551000	1.17706	0.351178
Q5ST30	Valine--tRNA ligase, mitochondrial	VARS2	1	1846600	1355400	1007200	1139100	1206600	1126500	985720	1157300	0.836924	0.308785
P62318	Small nuclear ribonucleoprotein Sm D3	SNRPD3	3	31980000	23393000	26871000	43708000	39133000	31500000	41141000	24312000	1.08046	0.655423
O43396	Thioredoxin-like protein 1	TXNL1	13	40842000	47277000	36620000	36146000	35411000	40140000	35043000	46085000	0.973857	0.773942
Q15397	Pumilio domain-containing protein KIAA0020	KIAA0020	4	1977200	3409600	4234200	0	0	4068000	2271600	2554200	0.924415	0.836662
P09622	Dihydrolipoyl dehydrogenase, mitochondrial	DLD	17	114050000	80281000	91927000	94303000	97771000	81250000	92216000	89665000	0.948342	0.584707
Q9NZZ3	Charged multivesicular body protein 5	CHMP5	3	7064900	11520000	7677100	7761500	9942300	8585900	0	7873000	1.03463	0.746001
Q9HCD5	Nuclear receptor coactivator 5	NCOA5	5	8068000	4899300	3168200	4145100	5181100	7377300	6477700	6798300	1.27385	0.212228
P52294	Importin subunit alpha-5;Importin subunit alpha-5, N-terminally processed	KPNA1	2	1961900	2261600	2950800	1615800	2626700	2489300	1919500	2772000	1.11574	0.440642
P51149	Ras-related protein Rab-7a	RAB7A	9	16699000	17356000	15533000	21092000	27391000	34011000	26854000	28932000	1.65801	0.000958537
Q8NCW5	NAD(P)H-hydrate epimerase	APOA1BP	3	5673100	2322800	7075600	5590700	10327000	0	8787900	7963300	1.74736	0.0883412
Q14692	Ribosome biogenesis protein BMS1 homolog	BMS1	6	3997400	5233700	3387200	2817900	3113400	2787200	4161600	4753700	0.959815	0.841266
Q12904	Aminoacyl tRNA synthase complex-interacting multifunctional protein 1;Endothelial monocyte-activating polypeptide 2	AIMP1	16	69868000	83620000	69552000	86615000	74427000	75917000	75485000	70875000	0.958176	0.550323
Q9Y5X3	Sorting nexin-5	SNX5	7	15058000	13411000	12146000	11950000	12388000	10967000	15782000	13413000	0.999715	0.960944
Q9BSE5	Agmatinase, mitochondrial	AGMAT	17	187030000	184470000	166650000	190220000	209690000	160050000	220870000	152920000	1.02081	0.9301
Q9H3G5	Probable serine carboxypeptidase CPVL	CPVL	13	33734000	47135000	49583000	36906000	26283000	43040000	33301000	47688000	0.898146	0.487792
P25788	Proteasome subunit alpha type-3	PSMA3	12	54080000	54656000	83076000	65157000	65418000	83264000	81600000	59483000	1.12763	0.372148
Q9HA64	Ketosamine-3-kinase	FN3KRP	5	11301000	13297000	7257500	9610800	9610000	7777700	10123000	11433000	0.939165	0.762997
Q9BQ52	Zinc phosphodiesterase ELAC protein 2	ELAC2	7	9509500	9438600	8710200	10179000	8404700	9478100	9747200	9156300	0.972223	0.556688
Q9NR30	Nucleolar RNA helicase 2	DDX21	26	94572000	94958000	71862000	77399000	84580000	79882000	75950000	106820000	1.02492	0.829648
P06493	Cyclin-dependent kinase 1	CDK1	3	9953500	0	10404000	11907000	9885600	9167500	9328300	7758400	0.840083	0.0700154
P22413	Ectonucleotide pyrophosphatase/phosphodiesterase family member 1;Alkaline phosphodiesterase I;Nucleotide pyrophosphatase	ENPP1	12	47628000	40100000	44278000	38880000	32546000	23927000	27443000	25499000	0.640281	0.00145404
P13473	Lysosome-associated membrane glycoprotein 2	LAMP2	2	8598700	0	17468000	8036000	8824000	13431000	8161800	5574100	0.791526	0.49858
P36543	V-type proton ATPase subunit E 1	ATP6V1E1	7	8257200	18861000	15734000	16120000	17895000	12455000	22700000	9931300	1.06798	0.824402
Q03252	Lamin-B2	LMNB2	12	11315000	19284000	16608000	11066000	11048000	19275000	11650000	16953000	1.01121	0.953395
O00743	Serine/threonine-protein phosphatase 6 catalytic subunit;Serine/threonine-protein phosphatase 6 catalytic subunit, N-terminally processed	PPP6C	2	2269500	1707100	2767600	2236700	1863000	4185300	2743600	2024500	1.20438	0.504718
O76024	Wolframin	WFS1	7	21730000	23837000	15257000	20656000	15157000	16666000	21783000	16711000	0.862997	0.291661
Q9HCN8	Stromal cell-derived factor 2-like protein 1	SDF2L1	2	9726500	7239000	4670600	10572000	6670600	5983100	14177000	5020600	0.988922	0.869253
Q9Y2B0	Protein canopy homolog 2	CNPY2	13	68495000	56316000	67119000	81206000	74659000	53183000	48791000	59122000	0.863141	0.247574
Q12797	Aspartyl/asparaginyl beta-hydroxylase	ASPH	14	52350000	58949000	60080000	48846000	50213000	57833000	47605000	57583000	0.968255	0.659205
Q9UKG1	DCC-interacting protein 13-alpha	APPL1	5	12538000	15729000	10331000	7212400	8554000	8822600	13045000	9088100	0.862461	0.542854
Q9NP72	Ras-related protein Rab-18	RAB18	3	1744300	1369200	2159600	1815000	1901600	2509100	2662200	2300700	1.32244	0.0541797
Q93034	Cullin-5	CUL5	4	7863000	4362500	4431300	4786900	5307800	5470000	5547800	4415400	0.96723	0.970769
Q8TCT9	Minor histocompatibility antigen H13	HM13	6	65161000	54645000	34241000	45127000	42340000	38303000	50681000	46863000	0.89463	0.575594
Q9H2W6	39S ribosomal protein L46, mitochondrial	MRPL46	7	16543000	16628000	15806000	20483000	18837000	14864000	15779000	19250000	0.98949	0.898371
Q66PJ3	ADP-ribosylation factor-like protein 6-interacting protein 4	ARL6IP4	1	1575500	0	638230	1102700	1205700	0	1213400	974550	1.02328	0.773738
A6NH11	Glycolipid transfer protein domain-containing protein 2	GLTPD2	1	0	567920	0	0	0	0	0	0	1	1
Q9Y3T9	Nucleolar complex protein 2 homolog	NOC2L	7	5966100	6948100	7827200	5866000	6498000	5300900	4401900	8689600	0.935469	0.58836
Q14847	LIM and SH3 domain protein 1	LASP1	18	205120000	239080000	208130000	164290000	224130000	167770000	107960000	234600000	0.89939	0.494705
O75323	Protein NipSnap homolog 2	GBAS	5	11270000	11615000	10344000	14803000	15730000	14438000	20937000	13531000	1.34569	0.055714
Q06481	Amyloid-like protein 2	APLP2	4	2055100	1658600	1701700	1908700	1205900	1095700	2001100	1162200	0.746153	0.073326
O43847	Nardilysin	NRD1	4	5421700	4346300	4997600	3828500	4971700	4613000	4505100	4272900	0.987555	0.951568
Q96CW1	AP-2 complex subunit mu	AP2M1	5	6870200	9277300	12448000	11749000	11030000	11575000	9725800	6041300	0.951111	0.795979
Q13206	Probable ATP-dependent RNA helicase DDX10	DDX10	3	2250000	3628600	1887600	2273800	2111100	2057800	2006900	1826900	0.797082	0.218438
O94826	Mitochondrial import receptor subunit TOM70	TOMM70A	13	29702000	34327000	31372000	27631000	27883000	30041000	30323000	31212000	0.970959	0.617791
Q04828	Aldo-keto reductase family 1 member C1	AKR1C1	5	40926000	36161000	29831000	45363000	41858000	31206000	49802000	28004000	0.990734	0.88726
Q00796	Sorbitol dehydrogenase	SORD	17	53939000	62694000	54061000	57918000	47446000	72164000	70746000	66380000	1.12302	0.354525
P01019	Angiotensinogen;Angiotensin-1;Angiotensin-2;Angiotensin-3;Angiotensin-4;Angiotensin 1-9;Angiotensin 1-7;Angiotensin 1-5;Angiotensin 1-4	AGT	9	50480000	49668000	51934000	49389000	47440000	40151000	39515000	41809000	0.838409	0.00591598
P63279	SUMO-conjugating enzyme UBC9	UBE2I	2	22015000	15369000	14664000	20534000	26587000	21406000	27116000	15407000	1.24709	0.249743
P24666	Low molecular weight phosphotyrosine protein phosphatase	ACP1	13	43451000	35606000	44241000	52620000	61423000	42342000	40215000	47201000	1.08676	0.547264
P21589	5-nucleotidase	NT5E	4	6290000	5228000	7632200	7580800	4108100	7567200	8468700	7682400	1.04098	0.937913
P54709	Sodium/potassium-transporting ATPase subunit beta-3	ATP1B3	6	32247000	45219000	27849000	39018000	26096000	28866000	35093000	34709000	0.864418	0.329158
O43399	Tumor protein D54	TPD52L2	11	53870000	63299000	60201000	46661000	45936000	50004000	25360000	52626000	0.776348	0.169147
P30050	60S ribosomal protein L12	RPL12	11	167910000	157210000	172500000	217570000	214200000	227230000	222460000	157420000	1.14838	0.268738
P25325	3-mercaptopyruvate sulfurtransferase	MPST	16	98333000	85566000	94743000	104520000	86629000	80169000	86209000	77451000	0.86245	0.0267142
Q9NR31;Q9Y6B6	GTP-binding protein SAR1a;GTP-binding protein SAR1b	SAR1A;SAR1B	2	0	3293700	2917900	2756200	4533400	4821400	4253800	5794800	1.62276	0.00314522
Q99470	Stromal cell-derived factor 2	SDF2	3	6634600	6870700	7141200	5184400	7715600	11821000	7439600	10542000	1.45245	0.0372429
Q6GMV2	SET and MYND domain-containing protein 5	SMYD5	4	5694900	6151400	6692700	5123300	5266900	5574700	4830700	7549600	0.981388	0.806969
Q92783	Signal transducing adapter molecule 1	STAM	3	5326500	3510400	4925100	4275300	5155400	5709000	4581100	4104700	1.08388	0.491193
Q9BVA1	Tubulin beta-2B chain	TUBB2B	1	4658700	7378200	5673700	4695000	9374000	32322000	7890600	25994000	3.37329	0.0295865
P09496	Clathrin light chain A	CLTA	7	48578000	43304000	42694000	49670000	57144000	35719000	62835000	39332000	1.05853	0.837588
Q16740	ATP-dependent Clp protease proteolytic subunit, mitochondrial	CLPP	3	5174600	3905800	5217200	5061100	4431200	4086600	3837300	3594300	0.823888	0.0612272
Q9H3Z4	DnaJ homolog subfamily C member 5	DNAJC5	3	6375300	0	6029800	5366000	4258700	5171200	6367000	6579100	0.944342	0.607001
Q9Y678	Coatomer subunit gamma-1	COPG1	31	240370000	202380000	215930000	210180000	198950000	195950000	192180000	212250000	0.919976	0.103402
P61289	Proteasome activator complex subunit 3	PSME3	11	57216000	63346000	56706000	61266000	58875000	61497000	75767000	59974000	1.0737	0.339308
A1L0T0	Acetolactate synthase-like protein	ILVBL	11	23013000	31046000	31197000	37483000	28161000	41110000	29639000	19921000	0.96816	0.789123
Q9NVA2	Septin-11	43354	3	5101600	5038600	5463600	4807500	4358600	4991600	6927300	5965800	1.08975	0.519674
O00418	Eukaryotic elongation factor 2 kinase	EEF2K	3	2197700	0	2247700	2325500	2324000	5432000	2112500	1425700	1.25104	0.785417
Q13586	Stromal interaction molecule 1	STIM1	8	6965100	5687700	7885500	4289900	3449800	15932000	6304000	6279500	1.28746	0.735797
P62750	60S ribosomal protein L23a	RPL23A	16	206600000	261820000	238330000	254630000	236000000	254650000	218590000	277320000	1.02619	0.735093
Q13405	39S ribosomal protein L49, mitochondrial	MRPL49	2	8537100	5730000	5469300	8134000	8537500	5577100	9801300	4904700	1.03409	0.952247
Q96T37	Putative RNA-binding protein 15	RBM15	6	3406500	5068500	4309100	3681700	4736700	4173700	4409400	5522900	1.14435	0.235627
Q8N392	Rho GTPase-activating protein 18	ARHGAP18	17	35895000	34103000	25201000	22643000	34845000	33117000	22106000	33225000	1.04626	0.765543
P54760	Ephrin type-B receptor 4	EPHB4	4	12748000	4513100	8170900	7822400	9439000	13130000	7446700	12706000	1.28469	0.292641
P13674	Prolyl 4-hydroxylase subunit alpha-1	P4HA1	28	160790000	157880000	162840000	149760000	120940000	122460000	129200000	127510000	0.792228	7.36237e-05
Q99714	3-hydroxyacyl-CoA dehydrogenase type-2	HSD17B10	16	57094000	51834000	82401000	75948000	70051000	71630000	86839000	85960000	1.17661	0.209093
Q16836	Hydroxyacyl-coenzyme A dehydrogenase, mitochondrial	HADH	16	65564000	76084000	61382000	60070000	57893000	68958000	79631000	66199000	1.03642	0.704323
Q9UJZ1	Stomatin-like protein 2, mitochondrial	STOML2	15	69198000	80850000	69492000	80411000	66884000	59506000	91318000	64395000	0.940497	0.510781
O43765	Small glutamine-rich tetratricopeptide repeat-containing protein alpha	SGTA	8	17274000	13024000	10405000	12238000	15579000	6661800	13814000	9985000	0.869644	0.455646
P61626	Lysozyme C	LYZ	3	9793700	13097000	10834000	8813500	11560000	10642000	11526000	10767000	1.046	0.550493
Q07960	Rho GTPase-activating protein 1	ARHGAP1	11	56383000	35348000	38690000	33762000	34157000	32646000	35929000	27863000	0.795423	0.151441
P43007	Neutral amino acid transporter A	SLC1A4	3	7151700	8111600	11202000	7453300	9355800	8238000	9465500	11378000	1.13322	0.31005
P63162;P14678	Small nuclear ribonucleoprotein-associated protein N;Small nuclear ribonucleoprotein-associated proteins B and B	SNRPN;SNRPB	4	8370900	15319000	10273000	12881000	7400500	17722000	11534000	17292000	1.15167	0.673269
P11310	Medium-chain specific acyl-CoA dehydrogenase, mitochondrial	ACADM	12	28259000	24319000	26664000	30996000	30364000	32326000	32008000	30616000	1.13676	0.0483365
Q9H4L7	SWI/SNF-related matrix-associated actin-dependent regulator of chromatin subfamily A containing DEAD/H box 1	SMARCAD1	2	16104000	13645000	12925000	12013000	14440000	12577000	12023000	10712000	0.909759	0.323183
P36551	Oxygen-dependent coproporphyrinogen-III oxidase, mitochondrial	CPOX	15	47272000	42228000	42094000	42830000	44061000	49092000	55966000	35065000	1.05596	0.701787
Q15070	Mitochondrial inner membrane protein OXA1L	OXA1L	1	538420	770300	787530	1540900	1073400	1368300	1298200	1545600	1.4532	0.105657
P61106	Ras-related protein Rab-14	RAB14	6	15134000	12654000	11458000	16529000	19290000	15167000	20935000	15585000	1.27256	0.0799971
P61026	Ras-related protein Rab-10	RAB10	5	18453000	11403000	15527000	22792000	14967000	30501000	12801000	12219000	1.03393	0.968871
P33992	DNA replication licensing factor MCM5	MCM5	12	28438000	45578000	49909000	39304000	17795000	40228000	30339000	31940000	0.737014	0.176563
P51665	26S proteasome non-ATPase regulatory subunit 7	PSMD7	11	44875000	55143000	52073000	58985000	41146000	66661000	63012000	63896000	1.11199	0.490314
O00425	Insulin-like growth factor 2 mRNA-binding protein 3	IGF2BP3	21	110650000	99637000	119820000	98390000	113090000	137170000	108500000	118850000	1.11462	0.169954
Q1KMD3	Heterogeneous nuclear ribonucleoprotein U-like protein 2	HNRNPUL2	21	131470000	122270000	112620000	104450000	133790000	111670000	114400000	109750000	0.997451	0.977272
Q99439	Calponin-2	CNN2	8	9212400	9821900	9603400	6076200	11224000	14326000	12173000	15339000	1.52855	0.0178826
Q9H6R4	Nucleolar protein 6	NOL6	10	12388000	9054100	5745000	8447500	13963000	10744000	13256000	9199800	1.32351	0.152498
P62910	60S ribosomal protein L32	RPL32	11	59620000	70242000	59894000	75886000	67157000	73208000	78893000	71794000	1.09566	0.214259
P06733	Alpha-enolase	ENO1	64	7088500000	6810200000	6423100000	7503300000	5383700000	4893600000	5993300000	4906400000	0.761075	0.00321305
P06576	ATP synthase subunit beta, mitochondrial	ATP5B	35	1955900000	1971800000	2024500000	2194800000	2091200000	2215900000	2148000000	1830700000	1.01704	0.767254
P61201	COP9 signalosome complex subunit 2	COPS2	7	15563000	14102000	13840000	14808000	8708500	12668000	14813000	8422200	0.765039	0.0820684
A2RRP1	Neuroblastoma-amplified sequence	NBAS	3	2256000	4250400	2943100	1401100	0	2835200	4502400	2124700	1.16274	0.608792
O95602	DNA-directed RNA polymerase I subunit RPA1	POLR1A	3	1752000	1836000	1812200	0	3053700	2097200	2097900	2728800	1.38573	0.0394622
Q96DZ1	Endoplasmic reticulum lectin 1	ERLEC1	3	2126100	2227400	2475900	2360000	2052500	1765000	1494200	2681300	0.869807	0.255991
Q9H9E3	Conserved oligomeric Golgi complex subunit 4	COG4	5	2686100	2388300	3332300	3415600	4224500	1860200	2982900	2257100	0.95791	0.69837
P42345	Serine/threonine-protein kinase mTOR	MTOR	6	5258600	2842500	4447200	4306300	5846900	5448400	6563600	3504800	1.26753	0.26122
P34897	Serine hydroxymethyltransferase, mitochondrial	SHMT2	32	302620000	310190000	302540000	301270000	266470000	321100000	304160000	275850000	0.959692	0.352995
Q9Y2S2	Lambda-crystallin homolog	CRYL1	6	4178300	4408600	3594300	4172700	3775500	6677100	4763900	3990500	1.17446	0.349672
Q9BPX5	Actin-related protein 2/3 complex subunit 5-like protein	ARPC5L	3	4777600	3329000	2710200	5106600	4368400	4072800	4669200	4038900	1.07699	0.519324
Q5T440	Putative transferase CAF17, mitochondrial	IBA57	1	2785700	2432600	1643900	2096700	1657500	2635400	2290100	2296300	0.991115	0.978721
Q9NXR7	BRCA1-A complex subunit BRE	BRE	1	1575900	0	2009000	0	2668700	1771900	3099500	0	1.4022	0.266383
Q9BTZ2	Dehydrogenase/reductase SDR family member 4	DHRS4	4	3409900	3901900	4451400	4064000	4441400	3838000	4838400	5437100	1.17234	0.141492
P49770	Translation initiation factor eIF-2B subunit beta	EIF2B2	5	6879900	8397300	5430800	4462200	6459600	4235500	5002100	6690800	0.889465	0.56734
P61803	Dolichyl-diphosphooligosaccharide--protein glycosyltransferase subunit DAD1	DAD1	2	11853000	12211000	11317000	12245000	12293000	10732000	16422000	12053000	1.08134	0.501642
O95571	Persulfide dioxygenase ETHE1, mitochondrial	ETHE1	7	10783000	21246000	11680000	11859000	9615800	12617000	14316000	13144000	0.89427	0.660782
Q99442	Translocation protein SEC62	SEC62	2	5684300	4591500	3526100	4455000	5257900	3136600	5001300	4688700	0.990557	0.927092
P31350	Ribonucleoside-diphosphate reductase subunit M2	RRM2	2	2016200	1671800	2015100	1896600	1770800	2635500	1808300	0	1.09032	0.574719
Q9HCU5	Prolactin regulatory element-binding protein	PREB	8	7485600	7030600	6707500	9576600	7976400	6241500	8222900	8167100	0.993753	0.979498
P62888	60S ribosomal protein L30	RPL30	10	43355000	44652000	50040000	51451000	68712000	54386000	64945000	43013000	1.21931	0.154505
Q13509	Tubulin beta-3 chain	TUBB3	13	196700000	249350000	275750000	258420000	258050000	289750000	279630000	241920000	1.09093	0.313866
P05386	60S acidic ribosomal protein P1	RPLP1	4	39821000	86793000	489410000	542550000	477700000	147000000	172430000	93464000	0.768698	0.945327
Q15833	Syntaxin-binding protein 2	STXBP2	5	9287100	17772000	6922300	6808600	7107500	6851200	8353600	8452500	0.754224	0.410347
Q9Y5X1	Sorting nexin-9	SNX9	3	3424600	4858900	3526700	5770800	3457900	3678300	2362700	3524400	0.74076	0.125136
P47813;O14602	Eukaryotic translation initiation factor 1A, X-chromosomal;Eukaryotic translation initiation factor 1A, Y-chromosomal	EIF1AX;EIF1AY	6	36295000	30588000	25661000	32125000	36302000	27545000	34196000	32041000	1.04344	0.646615
P61513	60S ribosomal protein L37a	RPL37A	4	8812700	12469000	11622000	14080000	14464000	12786000	15603000	13220000	1.19346	0.135298
P22392;O60361	Nucleoside diphosphate kinase B;Putative nucleoside diphosphate kinase	NME2;NME2P1	8	120510000	81042000	129490000	174450000	193550000	173120000	149170000	85516000	1.18964	0.517157
Q99538	Legumain	LGMN	4	6356100	8931800	8202100	7633800	6086100	4855200	7904200	8512000	0.87899	0.362115
P61916	Epididymal secretory protein E1	NPC2	6	6626400	5633100	0	5555800	8187600	3250100	5203200	6432400	0.971355	0.748848
Q9UDR5	Alpha-aminoadipic semialdehyde synthase, mitochondrial;Lysine ketoglutarate reductase;Saccharopine dehydrogenase	AASS	12	14743000	8913500	13242000	11867000	15103000	10560000	14201000	13920000	1.10291	0.460797
P23919	Thymidylate kinase	DTYMK	6	17416000	13819000	10907000	14944000	17131000	16481000	15434000	20540000	1.21897	0.123634
Q92522	Histone H1x	H1FX	4	8443200	10099000	6256300	8374900	5591600	6350100	5367300	8847000	0.788463	0.156715
Q9Y5J1	U3 small nucleolar RNA-associated protein 18 homolog	UTP18	4	6191700	6336400	3896400	4163100	4431400	4242700	4084100	0	0.826271	0.32513
Q8NC51	Plasminogen activator inhibitor 1 RNA-binding protein	SERBP1	17	48766000	88868000	67204000	50124000	41553000	52028000	30651000	71102000	0.76613	0.259353
P61966	AP-1 complex subunit sigma-1A	AP1S1	3	4894500	3218300	2314900	4653700	6125400	5021200	6020200	4081600	1.40891	0.109814
P53618	Coatomer subunit beta	COPB1	35	203790000	145100000	207470000	165730000	181190000	160600000	176710000	187240000	0.977357	0.887187
P48506	Glutamate--cysteine ligase catalytic subunit	GCLC	13	44026000	28522000	31494000	29077000	39586000	28939000	38041000	18710000	0.941083	0.682312
O75351	Vacuolar protein sorting-associated protein 4B	VPS4B	4	2474800	3374900	6195400	3365600	4842100	7775900	5763300	7382900	1.67184	0.0464214
P57740	Nuclear pore complex protein Nup107	NUP107	5	3271000	3184800	3437700	4197100	3846200	4220400	2560800	4504700	1.07391	0.710922
Q9BRJ2	39S ribosomal protein L45, mitochondrial	MRPL45	5	20287000	14290000	15335000	16517000	17740000	8670500	13658000	9180400	0.741377	0.122161
P51398	28S ribosomal protein S29, mitochondrial	DAP3	9	12753000	9942800	12773000	9046300	10245000	19816000	18126000	13803000	1.39256	0.122168
P05556	Integrin beta-1	ITGB1	17	99897000	103710000	112590000	84462000	100830000	114350000	92560000	114640000	1.05421	0.522674
Q9BYG3	MKI67 FHA domain-interacting nucleolar phosphoprotein	NIFK	5	4968000	6491800	5395200	5782000	6213500	8704700	6803800	7423000	1.28749	0.0340992
P62280	40S ribosomal protein S11	RPS11	17	143070000	152060000	150980000	188030000	206680000	164670000	196050000	157310000	1.14282	0.189
P68032;P63267;P68133;P62736	Actin, alpha cardiac muscle 1;Actin, gamma-enteric smooth muscle;Actin, alpha skeletal muscle;Actin, aortic smooth muscle	ACTC1;ACTG2;ACTA1;ACTA2	12	174980000	164710000	243250000	227710000	184590000	268600000	255500000	261860000	1.19725	0.210188
P26599	Polypyrimidine tract-binding protein 1	PTBP1	33	490690000	461490000	485180000	504620000	462470000	485840000	440110000	473570000	0.95881	0.184055
Q9HD33	39S ribosomal protein L47, mitochondrial	MRPL47	4	3129200	2962100	2695000	3215500	2679600	3543500	3736600	4623600	1.21509	0.183794
Q9Y5Y2	Cytosolic Fe-S cluster assembly factor NUBP2	NUBP2	3	0	13523000	24043000	22702000	23022000	20907000	21686000	9248200	0.931629	0.751905
P52788	Spermine synthase	SMS	5	16651000	19655000	13817000	17115000	23272000	16487000	19253000	18593000	1.15418	0.208449
P30519	Heme oxygenase 2	HMOX2	10	25028000	15488000	23397000	30178000	24854000	22677000	28998000	16667000	0.990488	0.995022
Q8WW12	PEST proteolytic signal-containing nuclear protein	PCNP	5	4278400	3984800	3736000	1694300	2511200	1493200	0	2930200	0.675221	0.281003
Q9Y3B9	RRP15-like protein	RRP15	3	4577200	5975200	5241800	3020600	3911700	3698400	4549400	5325600	0.929327	0.76499
O60547	GDP-mannose 4,6 dehydratase	GMDS	14	52225000	66548000	62261000	53591000	47437000	71104000	61273000	95093000	1.17169	0.431931
Q15155;P69849;Q5JPE7	Nodal modulator 1;Nodal modulator 3;Nodal modulator 2	NOMO1;NOMO3;NOMO2	14	26813000	19780000	26718000	19194000	18839000	17612000	18669000	21717000	0.830625	0.135379
O00151	PDZ and LIM domain protein 1	PDLIM1	16	311040000	258510000	204020000	214970000	290370000	204620000	207240000	195140000	0.907773	0.49609
P35573	Glycogen debranching enzyme;4-alpha-glucanotransferase;Amylo-alpha-1,6-glucosidase	AGL	5	3586200	2136700	3627600	2632700	1312800	2425300	2874500	3128100	0.812863	0.355368
P55795	Heterogeneous nuclear ribonucleoprotein H2	HNRNPH2	7	37792000	24154000	35992000	32174000	26360000	35749000	26909000	47344000	1.04804	0.858223
Q6L8Q7	2,5-phosphodiesterase 12	PDE12	7	13985000	9962500	8747300	9442800	12388000	13517000	11004000	9227200	1.09489	0.489255
Q15027	Arf-GAP with coiled-coil, ANK repeat and PH domain-containing protein 1	ACAP1	1	12659000	24947000	28561000	20550000	21468000	23581000	18723000	20831000	0.975622	0.934482
Q16637	Survival motor neuron protein	SMN1	5	2763700	4820700	10790000	6632600	5670400	2031100	2664800	4599000	0.598444	0.24605
P10620	Microsomal glutathione S-transferase 1	MGST1	3	3480000	4372600	6907100	4726300	5592000	5122900	4175600	5430000	1.04283	0.684221
Q04917	14-3-3 protein eta	YWHAH	12	50916000	68926000	75301000	59419000	68498000	95721000	71078000	63770000	1.17483	0.245872
Q86VR2	Protein FAM134C	FAM134C	2	3686700	4492700	2478300	3383900	2938100	3952300	4006100	2264000	0.937251	0.719701
O60610	Protein diaphanous homolog 1	DIAPH1	6	3841100	4338100	4203500	3429100	4855800	3330700	3667100	4163500	1.01298	0.945504
P09327	Villin-1	VIL1	60	718010000	638730000	608320000	635210000	671990000	540610000	574000000	670430000	0.944913	0.401093
Q9Y2Y0	ADP-ribosylation factor-like protein 2-binding protein	ARL2BP	2	2455000	2577500	2377100	3599900	2861600	1935500	2480100	2580200	0.895354	0.434917
Q9Y6A9	Signal peptidase complex subunit 1	SPCS1	2	6002000	3567600	3284300	5132700	5193600	2881000	5611600	3764500	0.970206	0.87996
Q9Y6Y8	SEC23-interacting protein	SEC23IP	12	42227000	38717000	36521000	37324000	40033000	38142000	36991000	41655000	1.01313	0.753987
Q96FC7	Phytanoyl-CoA hydroxylase-interacting protein-like	PHYHIPL	10	17167000	17420000	16933000	14795000	11802000	14833000	15937000	17584000	0.907125	0.297532
P12004	Proliferating cell nuclear antigen	PCNA	22	249060000	284500000	271060000	258960000	189560000	227560000	217570000	250790000	0.832547	0.027946
Q8WWI1	LIM domain only protein 7	LMO7	7	5556600	3480800	4346700	3770800	5119000	5284400	5053900	5316200	1.21094	0.0914946
O94760	N(G),N(G)-dimethylarginine dimethylaminohydrolase 1	DDAH1	9	41854000	37536000	28295000	36962000	39401000	31407000	50011000	35544000	1.081	0.592391
P62753	40S ribosomal protein S6	RPS6	21	158510000	182260000	175430000	192520000	179320000	169370000	158220000	177210000	0.96529	0.520299
O95433	Activator of 90 kDa heat shock protein ATPase homolog 1	AHSA1	13	48179000	61015000	49808000	52970000	52012000	56193000	57358000	61490000	1.07115	0.298846
O95832	Claudin-1	CLDN1	2	1391100	0	0	0	4454300	4621800	1966900	1306900	2.21945	1
P11586	C-1-tetrahydrofolate synthase, cytoplasmic;Methylenetetrahydrofolate dehydrogenase;Methenyltetrahydrofolate cyclohydrolase;Formyltetrahydrofolate synthetase;C-1-tetrahydrofolate synthase, cytoplasmic, N-terminally processed	MTHFD1	51	380960000	308400000	314610000	317890000	344920000	287890000	304730000	306790000	0.941348	0.378685
Q2M389	WASH complex subunit 7	KIAA1033	2	1046600	584540	1321300	930510	1006800	1378700	1140800	0	1.21087	0.348132
O43402	ER membrane protein complex subunit 8	EMC8	3	994880	1645900	1625300	1832700	1719500	2205200	0	2153500	1.32883	0.142221
P21291	Cysteine and glycine-rich protein 1	CSRP1	2	1619200	921780	677600	1512100	2181000	908990	806050	1154000	1.06751	0.882581
P61160	Actin-related protein 2	ACTR2	9	37091000	59448000	34509000	46234000	45240000	43876000	60142000	42591000	1.08217	0.55204
P35914	Hydroxymethylglutaryl-CoA lyase, mitochondrial	HMGCL	7	4304300	6609600	10427000	6833700	10205000	7634100	6878900	6173400	1.09643	0.582037
Q14444	Caprin-1	CAPRIN1	14	73077000	61750000	62813000	67903000	80548000	61728000	86914000	69915000	1.12639	0.234097
O75600	2-amino-3-ketobutyrate coenzyme A ligase, mitochondrial	GCAT	4	1875300	2175500	2470300	4277800	2073200	3224700	3010300	1348700	0.894248	0.682541
Q02252	Methylmalonate-semialdehyde dehydrogenase [acylating], mitochondrial	ALDH6A1	18	71877000	62203000	66697000	80249000	77616000	71221000	73948000	61319000	1.01095	0.881555
Q96CM8	Acyl-CoA synthetase family member 2, mitochondrial	ACSF2	15	63446000	54186000	52202000	50677000	55370000	54728000	60951000	58267000	1.03993	0.479679
Q13561	Dynactin subunit 2	DCTN2	16	53250000	39424000	43643000	43909000	39635000	33892000	44169000	37560000	0.861452	0.127654
P55157	Microsomal triglyceride transfer protein large subunit	MTTP	19	87171000	47900000	66577000	65898000	83389000	58761000	65619000	55376000	0.98355	0.964243
P18031	Tyrosine-protein phosphatase non-receptor type 1	PTPN1	6	10878000	11047000	13988000	10061000	10962000	11457000	6571900	9937700	0.846753	0.260126
P49023	Paxillin	PXN	2	613430	1166300	1032600	926100	0	549050	0	1007300	0.832622	0.511732
P00390	Glutathione reductase, mitochondrial	GSR	17	123390000	120010000	123810000	128400000	111390000	106060000	110220000	111340000	0.885797	0.000535401
Q8IXI1	Mitochondrial Rho GTPase 2	RHOT2	3	1445700	2145200	2997900	2963200	3989100	3073800	2921600	1582500	1.21095	0.514562
O43290	U4/U6.U5 tri-snRNP-associated protein 1	SART1	4	5076600	9513500	3582500	4489600	4029600	4882600	0	7442900	0.962254	0.995834
P41250	Glycine--tRNA ligase	GARS	32	187620000	205290000	188380000	169370000	147290000	188130000	161840000	201840000	0.931314	0.384398
Q9H5Q4	Dimethyladenosine transferase 2, mitochondrial	TFB2M	1	629430	991030	1060700	757030	397440	967240	735900	1184000	0.955322	0.718731
P56182	Ribosomal RNA processing protein 1 homolog A	RRP1	3	2645900	2643900	1815400	2792800	2291300	2252800	3254800	3138300	1.10499	0.50614
Q15437	Protein transport protein Sec23B	SEC23B	2	2987700	2168200	1692800	1819200	2620400	1712300	2318100	2665800	1.07484	0.631227
Q8TEA8	D-tyrosyl-tRNA(Tyr) deacylase 1	DTD1	2	1916400	2515600	1722700	2278500	1673800	797860	1408000	1331700	0.617958	0.0311918
Q12789	General transcription factor 3C polypeptide 1	GTF3C1	5	3790600	4084800	4132800	6436700	4164900	5450300	5056400	3848800	1.00409	0.908079
Q96AE4	Far upstream element-binding protein 1	FUBP1	35	324320000	276170000	255380000	261070000	281010000	253890000	256030000	261100000	0.941886	0.375318
Q14789	Golgin subfamily B member 1	GOLGB1	4	1533800	1209600	863030	1046400	1442600	2123900	1196500	1154000	1.2717	0.257239
Q68CZ2	Tensin-3	TNS3	15	13689000	21992000	22627000	24962000	13696000	13199000	13599000	11253000	0.621436	0.0186345
O60313	Dynamin-like 120 kDa protein, mitochondrial;Dynamin-like 120 kDa protein, form S1	OPA1	9	9990200	11857000	9556000	7839800	7809200	10862000	11022000	6044300	0.910672	0.525378
Q5JTH9	RRP12-like protein	RRP12	13	7487300	10859000	6636700	17052000	9585300	6903700	10583000	13415000	0.963174	0.984261
O75347	Tubulin-specific chaperone A	TBCA	12	102710000	85998000	83833000	90195000	102020000	82546000	122190000	83907000	1.07699	0.555945
P51687	Sulfite oxidase, mitochondrial	SUOX	1	0	1698500	3765200	4740600	7536000	2648100	4932500	0	1.4814	0.417519
P21980	Protein-glutamine gamma-glutamyltransferase 2	TGM2	5	8504000	15595000	13703000	7705800	7736700	14022000	6936700	11028000	0.872892	0.601812
P26368	Splicing factor U2AF 65 kDa subunit	U2AF2	11	80570000	68955000	85139000	82978000	67104000	73837000	57752000	72688000	0.854361	0.0740034
P05166	Propionyl-CoA carboxylase beta chain, mitochondrial	PCCB	7	16042000	12536000	12032000	11547000	12509000	11188000	14371000	15515000	1.02734	0.798695
O75369	Filamin-B	FLNB	162	879010000	2147500000	1678800000	1004200000	979760000	2396600000	1794300000	2654200000	1.3705	0.346564
O43242	26S proteasome non-ATPase regulatory subunit 3	PSMD3	26	78774000	82714000	92717000	76540000	78584000	79216000	66352000	93514000	0.960456	0.602299
O00330	Pyruvate dehydrogenase protein X component, mitochondrial	PDHX	5	12991000	10132000	12414000	9661600	12733000	12298000	11111000	14000000	1.10937	0.261384
O76021	Ribosomal L1 domain-containing protein 1	RSL1D1	34	119290000	161710000	117610000	126450000	99263000	109090000	103270000	146420000	0.872363	0.269076
Q15050	Ribosome biogenesis regulatory protein homolog	RRS1	4	10559000	6992800	5395500	6497100	6527300	8457800	6889000	8183700	1.02083	0.776623
Q92688	Acidic leucine-rich nuclear phosphoprotein 32 family member B	ANP32B	11	111470000	101600000	92870000	94710000	71911000	125490000	108160000	91797000	0.991783	0.840708
P30086	Phosphatidylethanolamine-binding protein 1;Hippocampal cholinergic neurostimulating peptide	PEBP1	20	1456800000	980840000	1142400000	2018700000	2042500000	1572600000	2062400000	1036500000	1.1992	0.446684
P56134	ATP synthase subunit f, mitochondrial	ATP5J2	2	0	11993000	14122000	31748000	29480000	19560000	28757000	13730000	1.18634	0.534121
Q9Y2T2	AP-3 complex subunit mu-1	AP3M1	4	5670700	0	4802100	8116000	4469800	5643200	5075500	4762400	0.804956	0.226477
Q8N983	39S ribosomal protein L43, mitochondrial	MRPL43	3	4378600	3692900	3938600	3615700	6023400	5086500	8141900	3934500	1.48385	0.0622068
Q9Y570	Protein phosphatase methylesterase 1	PPME1	9	14838000	14076000	11315000	13338000	15114000	17389000	14192000	17307000	1.1948	0.059938
Q9Y2R9	28S ribosomal protein S7, mitochondrial	MRPS7	4	10583000	7003200	8015200	10385000	8813000	10138000	9017000	10485000	1.06854	0.500402
Q9H3U1	Protein unc-45 homolog A	UNC45A	7	3852300	5433400	7430700	4456800	9163900	4351000	4343200	4711900	1.06597	0.865079
Q7L5N1	COP9 signalosome complex subunit 6	COPS6	5	3090600	3641600	3697700	4182400	4053500	8670800	2957000	3953700	1.34373	0.401909
P36578	60S ribosomal protein L4	RPL4	34	233220000	404450000	324330000	337770000	250710000	323180000	306740000	377430000	0.96791	0.87077
Q14764	Major vault protein	MVP	7	2450400	5292200	9943400	5803700	6842300	7822600	5089300	12927000	1.3913	0.30838
P07902	Galactose-1-phosphate uridylyltransferase	GALT	2	3302300	0	1908000	2398500	2732900	2253100	1752000	1244100	0.786796	0.337158
Q9H4M9	EH domain-containing protein 1	EHD1	10	17373000	21479000	24256000	22712000	18884000	12552000	26447000	14709000	0.845863	0.302729
Q9H1Y0	Autophagy protein 5	ATG5	1	1391000	0	921490	629790	841720	0	1753500	1195600	1.2884	0.45025
O00754	Lysosomal alpha-mannosidase;Lysosomal alpha-mannosidase A peptide;Lysosomal alpha-mannosidase B peptide;Lysosomal alpha-mannosidase C peptide;Lysosomal alpha-mannosidase D peptide;Lysosomal alpha-mannosidase E peptide	MAN2B1	8	5209700	6489600	4278600	8328900	4110900	5820900	5641400	5563200	0.869567	0.500125
Q96T76	MMS19 nucleotide excision repair protein homolog	MMS19	9	16546000	12131000	12011000	12573000	13284000	17882000	10656000	16031000	1.08622	0.612828
Q96C86	m7GpppX diphosphatase	DCPS	3	4863800	4815600	3786100	3145900	3261200	3984700	4097700	2471500	0.831664	0.276079
O43678	NADH dehydrogenase [ubiquinone] 1 alpha subcomplex subunit 2	NDUFA2	1	3045000	0	0	3750800	0	0	0	1825700	0.537302	1
Q8IXH7	Negative elongation factor C/D	NELFCD	4	6712600	8162500	6963800	7944600	8415000	5839300	6165200	8014700	0.954696	0.611823
P52943	Cysteine-rich protein 2	CRIP2	2	5028500	4858700	6337400	4633800	6436500	2229100	3070600	5169100	0.810479	0.29729
O95793	Double-stranded RNA-binding protein Staufen homolog 1	STAU1	22	100080000	104660000	87940000	78264000	87772000	87687000	99722000	96877000	1.003	0.919922
P21695	Glycerol-3-phosphate dehydrogenase [NAD(+)], cytoplasmic	GPD1	9	12134000	9384100	7837700	9135700	6202000	13126000	20146000	10462000	1.29733	0.503563
Q14151	Scaffold attachment factor B2	SAFB2	1	1643800	0	0	0	0	0	2116900	2976800	1.54937	1
Q969Q0	60S ribosomal protein L36a-like	RPL36AL	2	7126400	9440600	6688800	8731400	6703000	7142500	5531300	9473400	0.90193	0.447701
O95747	Serine/threonine-protein kinase OSR1	OXSR1	4	3108100	4179600	8455100	8848700	4829400	7132800	6888300	5510300	0.990619	0.797236
P54687	Branched-chain-amino-acid aminotransferase, cytosolic	BCAT1	4	4884200	5332100	4666600	4960300	4698400	7474300	5600000	5215800	1.15851	0.245586
P08240	Signal recognition particle receptor subunit alpha	SRPR	8	6948500	13189000	10299000	10307000	8991000	10561000	11094000	10380000	1.00693	0.841557
P84085	ADP-ribosylation factor 5	ARF5	2	4168000	3205100	3072400	4254400	4726300	3948300	4736800	3276500	1.13524	0.341747
P00387	NADH-cytochrome b5 reductase 3;NADH-cytochrome b5 reductase 3 membrane-bound form;NADH-cytochrome b5 reductase 3 soluble form	CYB5R3	12	28602000	45882000	44741000	42863000	35553000	38900000	51495000	36782000	1.00396	0.945146
O15269	Serine palmitoyltransferase 1	SPTLC1	4	9457300	7644900	7462300	6197700	6462100	7432400	7965000	10012000	1.03606	0.796376
Q5T9A4	ATPase family AAA domain-containing protein 3B	ATAD3B	1	7112100	8681400	5929700	6501900	8268200	7011400	9460900	6837900	1.11881	0.346968
Q9UQ80	Proliferation-associated protein 2G4	PA2G4	26	141290000	154650000	139120000	141330000	126260000	139320000	127500000	160110000	0.959749	0.483732
Q9BRQ8	Apoptosis-inducing factor 2	AIFM2	3	822170	1645100	1725800	1876700	1580700	1531800	1333100	1393100	0.961931	0.97427
Q9NXV6	CDKN2A-interacting protein	CDKN2AIP	3	2050800	1394400	1699500	1428400	1436200	1559100	1474700	1551600	0.916097	0.439514
P35613	Basigin	BSG	13	252950000	215860000	227480000	201190000	201120000	177560000	198960000	233630000	0.903942	0.21691
P39023	60S ribosomal protein L3	RPL3	34	216360000	267920000	219710000	246450000	217500000	220080000	250900000	257760000	0.995581	0.960456
P50213	Isocitrate dehydrogenase [NAD] subunit alpha, mitochondrial	IDH3A	13	24342000	24448000	24759000	27921000	20097000	27994000	22725000	25425000	0.948468	0.482346
Q9Y6M5	Zinc transporter 1	SLC30A1	3	12457000	9406700	8928500	9512600	9228400	7555700	9768300	8214100	0.86259	0.178609
Q13619	Cullin-4A	CUL4A	2	1075300	1321600	1016100	1335300	0	1272400	1316400	0	1.09041	0.425566
Q96G23	Ceramide synthase 2	CERS2	3	11407000	14128000	10542000	12766000	12809000	13325000	10322000	13229000	1.01724	0.845148
P16219	Short-chain specific acyl-CoA dehydrogenase, mitochondrial	ACADS	9	10591000	12335000	8026200	10145000	9801800	9481500	10403000	15240000	1.09317	0.585379
Q14980	Nuclear mitotic apparatus protein 1	NUMA1	11	2697000	5904400	0	2925200	4484300	4810600	6633900	4050600	1.3	0.258375
Q9Y5Q9	General transcription factor 3C polypeptide 3	GTF3C3	3	1182900	1411400	1289400	1430500	1964900	2287600	2064500	1215300	1.41739	0.0698236
Q9NUD5	Zinc finger CCHC domain-containing protein 3	ZCCHC3	8	5031100	2611100	4395300	6241600	5197100	4531900	4126600	6076600	1.09044	0.566365
Q9Y5K6	CD2-associated protein	CD2AP	5	7861400	10145000	8383500	4790600	7849100	8306000	7779600	8068200	1.02638	0.716064
Q9UMS0	NFU1 iron-sulfur cluster scaffold homolog, mitochondrial	NFU1	4	12290000	7392400	12374000	12462000	12116000	15117000	18462000	12278000	1.30223	0.146416
P98179	RNA-binding protein 3	RBM3	5	34693000	29004000	31529000	37363000	35849000	26408000	37338000	25448000	0.943087	0.568369
P20073	Annexin A7	ANXA7	14	51517000	50749000	46413000	49074000	31980000	51680000	46704000	58012000	0.952582	0.606275
Q9Y399	28S ribosomal protein S2, mitochondrial	MRPS2	5	8033600	8130000	7606400	7690400	10063000	8222500	10536000	9975700	1.23321	0.0115017
Q15738	Sterol-4-alpha-carboxylate 3-dehydrogenase, decarboxylating	NSDHL	9	16803000	18645000	15705000	22687000	18773000	19635000	25270000	20813000	1.14424	0.230897
Q9NSK0	Kinesin light chain 4	KLC4	7	10874000	11355000	9947000	10253000	7295400	10408000	8003900	11145000	0.868564	0.194077
Q13243	Serine/arginine-rich splicing factor 5	SRSF5	7	28225000	26591000	20310000	22968000	24525000	28870000	35998000	29256000	1.20954	0.13082
Q96B54	Zinc finger protein 428	ZNF428	2	1485200	4065800	4218900	2187100	2852800	2095400	1791000	2843200	0.801405	0.606504
O75191	Xylulose kinase	XYLB	10	18758000	12011000	22121000	27087000	22599000	24662000	22292000	14201000	1.04723	0.764039
P18077	60S ribosomal protein L35a	RPL35A	6	20376000	25426000	23531000	29472000	34465000	29433000	30825000	27941000	1.24148	0.0468077
Q00534	Cyclin-dependent kinase 6	CDK6	6	12070000	9817100	15657000	11575000	17232000	13275000	13668000	8093900	1.06413	0.832678
Q13151	Heterogeneous nuclear ribonucleoprotein A0	HNRNPA0	14	113280000	92322000	80025000	95698000	100480000	100380000	116910000	115120000	1.13523	0.161928
Q96EL3	39S ribosomal protein L53, mitochondrial	MRPL53	2	2044600	2296300	1620900	3105100	1977300	957770	2005900	1687200	0.731029	0.188803
Q9NZB2	Constitutive coactivator of PPAR-gamma-like protein 1	FAM120A	5	6324400	6707900	8476400	7253400	8124600	7158300	8573700	12189000	1.25323	0.155985
Q9H4A4	Aminopeptidase B	RNPEP	10	27171000	23833000	26759000	22115000	20168000	19017000	17962000	19757000	0.769979	0.00336569
Q9P015	39S ribosomal protein L15, mitochondrial	MRPL15	9	15402000	25808000	16021000	27793000	22335000	19062000	22357000	11979000	0.890725	0.625702
P02751	Fibronectin;Anastellin;Ugl-Y1;Ugl-Y2;Ugl-Y3	FN1	37	57809000	110220000	99794000	57772000	70626000	114090000	66390000	124140000	1.15249	0.554399
P51991	Heterogeneous nuclear ribonucleoprotein A3	HNRNPA3	23	276300000	300320000	264090000	271110000	244300000	294320000	290050000	269040000	0.987309	0.788355
P63165	Small ubiquitin-related modifier 1	SUMO1	3	13365000	12939000	11464000	14126000	15141000	12295000	15379000	14866000	1.11152	0.177149
O14818	Proteasome subunit alpha type-7	PSMA7	11	48712000	53801000	81082000	63869000	66634000	84543000	74745000	64140000	1.17214	0.22683
Q969X5	Endoplasmic reticulum-Golgi intermediate compartment protein 1	ERGIC1	5	3032300	3501700	4621100	5008900	3307300	4357800	3315700	5395500	1.01313	0.945068
P53985	Monocarboxylate transporter 1	SLC16A1	6	51193000	31882000	30445000	36037000	36484000	27863000	42268000	47588000	1.03107	0.847067
P16989	Y-box-binding protein 3	YBX3	4	14983000	9283400	10855000	8455300	9438300	9791800	7310000	5984600	0.746378	0.1431
O00193	Small acidic protein	SMAP	6	25929000	25215000	26383000	23564000	23855000	16663000	8632700	19988000	0.683925	0.0934321
P49593	Protein phosphatase 1F	PPM1F	2	968070	1016800	1289800	781080	947170	937580	1189300	714170	0.934037	0.657134
Q5T6V5	UPF0553 protein C9orf64	C9orf64	4	5912400	8531900	6915500	6394600	4088200	5476100	7702000	8604500	0.932133	0.604564
Q9UID3	Vacuolar protein sorting-associated protein 51 homolog	VPS51	2	1489200	1408900	0	0	1191000	1413800	1232500	1312400	0.888461	0.112007
P23378	Glycine dehydrogenase (decarboxylating), mitochondrial	GLDC	32	156730000	135420000	159290000	162850000	189610000	152300000	189130000	165620000	1.13409	0.117664
Q9UL25	Ras-related protein Rab-21	RAB21	5	0	1662200	0	5098500	2927600	3857000	3066800	3354600	0.976674	0.751942
O75915	PRA1 family protein 3	ARL6IP5	3	7053400	3538300	4179400	4883500	7533100	8153800	5194800	7997600	1.46934	0.0680605
P11532	Dystrophin	DMD	4	6178100	5426500	4577000	5924500	7472400	5411600	6120000	5845400	1.1241	0.270389
Q13085	Acetyl-CoA carboxylase 1;Biotin carboxylase	ACACA	18	23489000	26581000	30421000	26769000	22425000	25215000	23173000	21421000	0.85991	0.0565511
P25705	ATP synthase subunit alpha, mitochondrial	ATP5A1	52	1078600000	1123500000	1251900000	1183100000	938930000	1264400000	1038500000	1257800000	0.970354	0.665105
O43159	Ribosomal RNA-processing protein 8	RRP8	3	2310700	3590800	2645100	2469300	0	0	0	4397800	1.59689	1
P35249	Replication factor C subunit 4	RFC4	4	3586500	4501800	4066400	4232800	3396500	5603400	5216900	3093100	1.05629	0.878929
P60174	Triosephosphate isomerase	TPI1	23	1237300000	1154700000	1266800000	1296500000	1386200000	1668500000	1590500000	1427800000	1.22556	0.00720775
P20618	Proteasome subunit beta type-1	PSMB1	8	73353000	53608000	69836000	77011000	91985000	93252000	91239000	80232000	1.30277	0.0214215
O14974	Protein phosphatase 1 regulatory subunit 12A	PPP1R12A	7	5619200	4832100	4979500	3848100	4793000	4377600	3712400	6484500	1.0046	0.959874
Q9Y3D8	Adenylate kinase isoenzyme 6	AK6	1	0	1880500	1210000	2518500	3631200	3450900	2546300	2195100	1.58096	0.0895396
P27694	Replication protein A 70 kDa DNA-binding subunit;Replication protein A 70 kDa DNA-binding subunit, N-terminally processed	RPA1	13	35011000	34954000	33552000	35517000	25395000	29500000	32310000	34330000	0.874139	0.0795297
Q9BYJ9	YTH domain-containing family protein 1	YTHDF1	2	2451000	3964600	2676400	2689800	3020700	2437200	3081700	3171100	0.993965	0.956386
Q58FF8	Putative heat shock protein HSP 90-beta 2	HSP90AB2P	2	219560000	120580000	196740000	128450000	284200000	170040000	132870000	86353000	1.01222	0.876888
Q8WZA9	Immunity-related GTPase family Q protein	IRGQ	6	7093700	8093800	5559200	8410100	11573000	9477800	8333100	8294900	1.29228	0.0771932
P09012	U1 small nuclear ribonucleoprotein A	SNRPA	12	34886000	52214000	53638000	58258000	53069000	45876000	59471000	45193000	1.02318	0.800241
Q13438	Protein OS-9	OS9	4	4008000	3928500	4510700	3678100	2697000	3067000	0	2686700	0.698753	0.00221695
O15213	WD repeat-containing protein 46	WDR46	4	1803400	2841500	1628800	2340500	0	1920500	1592700	2291600	0.898485	0.610766
Q14126	Desmoglein-2	DSG2	9	17419000	18624000	21819000	22534000	30560000	22382000	30204000	23543000	1.32704	0.03458
P05165	Propionyl-CoA carboxylase alpha chain, mitochondrial	PCCA	13	29181000	35203000	37604000	29973000	36743000	36496000	34888000	41146000	1.13119	0.123076
Q9NUJ3	T-complex protein 11-like protein 1	TCP11L1	1	6170500	23231000	19418000	17568000	10144000	17430000	5818600	8590600	0.632396	0.298279
Q9UQ35	Serine/arginine repetitive matrix protein 2	SRRM2	12	15384000	10801000	16272000	12623000	17107000	11339000	9937100	16884000	1.0034	0.945695
P51452	Dual specificity protein phosphatase 3	DUSP3	7	12892000	6222100	14098000	19818000	21551000	17731000	24713000	10719000	1.4089	0.262283
Q9UNY4	Transcription termination factor 2	TTF2	1	5141200	3679200	3054300	6214300	6381400	3145800	5871700	4721000	1.11227	0.643778
P83881	60S ribosomal protein L36a	RPL36A	3	6085000	9434100	5738600	8745100	6106000	6257900	5616000	9657900	0.921174	0.654543
P02649	Apolipoprotein E	APOE	12	46375000	44400000	33719000	38516000	30239000	27369000	33784000	34339000	0.771309	0.0289733
Q9Y4L1	Hypoxia up-regulated protein 1	HYOU1	48	470720000	450110000	576320000	463870000	392650000	383510000	358360000	405260000	0.785193	0.00863311
P46776	60S ribosomal protein L27a	RPL27A	8	82644000	105220000	74403000	104440000	99137000	113910000	118440000	113520000	1.21352	0.0768251
Q14738	Serine/threonine-protein phosphatase 2A 56 kDa regulatory subunit delta isoform	PPP2R5D	8	30100000	26420000	25751000	27449000	29258000	20967000	25302000	17042000	0.843684	0.173469
P30047	GTP cyclohydrolase 1 feedback regulatory protein	GCHFR	2	2692100	0	0	2299100	2536500	0	6897700	0	1.89017	0.412761
P55735	Protein SEC13 homolog	SEC13	4	20853000	28207000	24077000	22681000	19033000	31244000	32574000	28001000	1.1569	0.379487
Q8IU81	Interferon regulatory factor 2-binding protein 1	IRF2BP1	3	1357500	2388700	1528200	1413000	0	1662500	0	0	0.994407	1
Q9HD34	LYR motif-containing protein 4	LYRM4	1	2127000	0	1390000	2078300	2060200	0	1990600	0	1.08595	0.613463
Q13155	Aminoacyl tRNA synthase complex-interacting multifunctional protein 2	AIMP2	9	18929000	36682000	27138000	27486000	25402000	32864000	34646000	32923000	1.14152	0.356648
Q6IA69	Glutamine-dependent NAD(+) synthetase	NADSYN1	1	810320	907590	753250	386640	763510	1340600	518320	514430	1.09765	0.844792
Q6NUQ4	Transmembrane protein 214	TMEM214	5	6920500	5862300	4705500	4952700	3965000	5058900	4769600	5165700	0.844846	0.177584
P08559	Pyruvate dehydrogenase E1 component subunit alpha, somatic form, mitochondrial	PDHA1	19	51629000	52371000	48312000	52471000	43421000	53575000	56245000	55283000	1.01827	0.838253
Q9Y224	UPF0568 protein C14orf166	C14orf166	8	6419300	7782600	13824000	10752000	7583900	14401000	4201400	14008000	1.03653	0.918545
Q16706	Alpha-mannosidase 2	MAN2A1	7	14450000	9766200	12209000	12832000	12697000	13902000	15013000	8889700	1.02527	0.914617
Q9NZT2	Opioid growth factor receptor	OGFR	6	6650600	8902800	12158000	8723800	5033400	3622300	4307700	6797100	0.542346	0.0146955
Q99615	DnaJ homolog subfamily C member 7	DNAJC7	12	12755000	13383000	10785000	11283000	13128000	9528200	14106000	17907000	1.13407	0.48121
Q9H2H8	Peptidyl-prolyl cis-trans isomerase-like 3	PPIL3	2	6293300	3858100	7336000	9866800	13324000	5843200	16831000	4431000	1.47799	0.456637
Q99878;Q96KK5;Q6FI13;P20671;P0C0S8;Q9BTM1;Q16777;Q93077;Q7L7L0;P04908;Q96QV6;P16104	Histone H2A type 1-J;Histone H2A type 1-H;Histone H2A type 2-A;Histone H2A type 1-D;Histone H2A type 1;Histone H2A.J;Histone H2A type 2-C;Histone H2A type 1-C;Histone H2A type 3;Histone H2A type 1-B/E;Histone H2A type 1-A;Histone H2AX	HIST1H2AJ;HIST1H2AH;HIST2H2AA3;HIST1H2AD;HIST1H2AG;H2AFJ;HIST2H2AC;HIST1H2AC;HIST3H2A;HIST1H2AB;HIST1H2AA;H2AFX	6	72878000	74148000	81555000	104300000	69816000	114060000	94247000	41534000	0.960274	0.694151
P08697	Alpha-2-antiplasmin	SERPINF2	2	2636800	3203400	2292700	2650500	2974200	1474500	2005200	0	0.798004	0.226099
P49792	E3 SUMO-protein ligase RanBP2	RANBP2	43	76895000	63419000	63543000	67146000	71284000	55208000	63323000	69331000	0.956248	0.54899
Q96I15	Selenocysteine lyase	SCLY	6	10302000	11695000	9375400	9390300	11094000	11988000	12075000	7603400	1.04901	0.781709
O95406	Protein cornichon homolog 1	CNIH1	1	0	0	0	706210	0	0	0	738670	1.04596	1
Q86SX6	Glutaredoxin-related protein 5, mitochondrial	GLRX5	3	21763000	11514000	7699800	24545000	19482000	9979700	27224000	9733300	1.01369	0.95684
Q9BRR6	ADP-dependent glucokinase	ADPGK	5	2148700	5867400	7550800	5086000	4528600	4266300	4306500	3178700	0.788272	0.614109
Q9HA77	Probable cysteine--tRNA ligase, mitochondrial	CARS2	3	4824800	5215500	5018000	4039200	4310300	3905800	3839100	4814500	0.883346	0.159231
P31948	Stress-induced-phosphoprotein 1	STIP1	58	766160000	522770000	485320000	479190000	575180000	425720000	591500000	548240000	0.949943	0.775642
P17252	Protein kinase C alpha type	PRKCA	6	12852000	12798000	15120000	12014000	12790000	14053000	12853000	9856100	0.938771	0.483201
P61619	Protein transport protein Sec61 subunit alpha isoform 1	SEC61A1	5	20911000	26708000	18583000	18448000	19413000	19961000	25236000	25842000	1.06854	0.567422
Q14011	Cold-inducible RNA-binding protein	CIRBP	4	7271700	8322900	8474000	9504700	10300000	5422600	8985500	7375400	0.955625	0.661765
P53004	Biliverdin reductase A	BLVRA	10	14226000	20961000	21698000	19164000	14074000	26800000	17397000	19262000	1.01951	0.97776
Q9HCS7	Pre-mRNA-splicing factor SYF1	XAB2	3	2155300	1646100	1483500	1651700	1931100	1332600	1477600	1720000	0.931479	0.556481
Q9NR45	Sialic acid synthase	NANS	22	120520000	144680000	127110000	135290000	110460000	138190000	161570000	138480000	1.03999	0.723291
P62899	60S ribosomal protein L31	RPL31	11	109320000	98191000	70801000	88273000	91207000	85279000	90221000	92570000	0.980065	0.934832
P41240	Tyrosine-protein kinase CSK	CSK	3	2230400	1522700	4426900	2429500	3280200	3395900	3047700	2028900	1.10775	0.550581
Q9H0U6	39S ribosomal protein L18, mitochondrial	MRPL18	3	3415800	4788100	3314800	4340800	3793200	4509600	3611100	3830400	0.992736	0.989897
Q9UEE9	Craniofacial development protein 1	CFDP1	2	3570300	386550	2547800	2096100	1992400	2317700	1779900	2471500	0.995436	0.631072
Q9UNZ2	NSFL1 cofactor p47	NSFL1C	20	110820000	115600000	110180000	93254000	103630000	96614000	98980000	114120000	0.961592	0.550431
Q13242	Serine/arginine-rich splicing factor 9	SRSF9	10	24150000	23884000	23932000	21327000	27034000	25383000	21387000	29908000	1.11168	0.238624
P00352	Retinal dehydrogenase 1	ALDH1A1	41	689890000	536620000	594520000	658280000	553530000	561640000	616660000	525170000	0.910334	0.211998
O00566	U3 small nucleolar ribonucleoprotein protein MPP10	MPHOSPH10	3	5580900	0	5982600	7199800	6655900	3887700	4352200	6718500	0.863959	0.387391
Q9Y508	E3 ubiquitin-protein ligase RNF114	RNF114	1	2300300	4031600	2400300	3137100	3067100	1870000	1466700	2888500	0.782885	0.274873
Q9BZZ5	Apoptosis inhibitor 5	API5	9	22914000	25732000	21980000	14571000	27301000	22705000	24561000	28471000	1.20941	0.172421
P62841	40S ribosomal protein S15	RPS15	10	88076000	76531000	72429000	106760000	111900000	92694000	92109000	67785000	1.06019	0.701731
P46108	Adapter molecule crk	CRK	4	4900200	5966300	4144000	5470800	6773300	7427500	8389700	5725900	1.38255	0.028244
Q01844	RNA-binding protein EWS	EWSR1	5	65154000	54984000	59972000	55885000	64086000	60218000	65794000	68339000	1.0951	0.0978173
P13010	X-ray repair cross-complementing protein 5	XRCC5	46	1014400000	820140000	894180000	816680000	996130000	787890000	800720000	807600000	0.956829	0.571742
P55957	BH3-interacting domain death agonist;BH3-interacting domain death agonist p15;BH3-interacting domain death agonist p13;BH3-interacting domain death agonist p11	BID	5	10817000	4297900	4615500	8780500	4957300	5964900	5678800	6704100	0.81741	0.609203
Q92905	COP9 signalosome complex subunit 5	COPS5	4	9876800	9180300	8175900	8485100	7142800	9715300	9979100	9544300	1.01857	0.893755
Q92499	ATP-dependent RNA helicase DDX1	DDX1	21	80496000	69839000	71414000	61536000	75693000	73393000	63697000	73328000	1.00998	0.861201
P33908	Mannosyl-oligosaccharide 1,2-alpha-mannosidase IA	MAN1A1	6	9648700	8983600	6787800	9438700	7511100	4439000	4956800	7936600	0.712689	0.0743776
Q96S44	TP53-regulating kinase	TP53RK	2	3220400	3211300	2311100	2633800	2539400	2534400	3374800	2325500	0.94704	0.648384
Q9P2R7	Succinyl-CoA ligase [ADP-forming] subunit beta, mitochondrial	SUCLA2	14	20456000	16294000	17908000	19046000	18371000	19982000	25638000	19302000	1.1301	0.233785
Q9BYD3	39S ribosomal protein L4, mitochondrial	MRPL4	4	14924000	10354000	10010000	11112000	11974000	11107000	14174000	11082000	1.04175	0.666718
P38159	RNA-binding motif protein, X chromosome;RNA-binding motif protein, X chromosome, N-terminally processed	RBMX	10	76319000	78741000	64865000	73921000	70544000	63066000	76146000	76128000	0.972904	0.668531
Q14C86	GTPase-activating protein and VPS9 domain-containing protein 1	GAPVD1	3	2068700	2600900	3098500	3202400	3184000	3105600	3514500	2347800	1.10769	0.453671
O75348	V-type proton ATPase subunit G 1	ATP6V1G1	6	9343600	7823000	6715200	7226400	8479100	4485500	6122700	7012400	0.838997	0.24823
O15260	Surfeit locus protein 4	SURF4	4	71209000	34214000	92084000	149950000	83322000	55478000	31343000	13770000	0.529312	0.205281
Q96HN2;O43865	Putative adenosylhomocysteinase 3;Putative adenosylhomocysteinase 2	AHCYL2;AHCYL1	4	7250900	7502700	5868400	7516700	7022700	7339700	8805200	9425200	1.15829	0.168415
Q13884	Beta-1-syntrophin	SNTB1	18	68362000	62950000	60085000	60597000	63396000	59521000	60521000	59812000	0.965301	0.335884
Q8N465	D-2-hydroxyglutarate dehydrogenase, mitochondrial	D2HGDH	3	2965900	2020000	2047100	3517700	2586200	2755600	3659200	1997100	1.0424	0.808494
O95166	Gamma-aminobutyric acid receptor-associated protein	GABARAP	2	2479900	1615000	1547400	2299200	1551200	1890800	2441300	2035000	0.997079	0.971963
O60443	Non-syndromic hearing impairment protein 5	DFNA5	3	3126500	2037800	2914000	3838900	0	4827900	3673700	4298300	1.43209	0.0762371
P51648	Fatty aldehyde dehydrogenase	ALDH3A2	14	21436000	27449000	28278000	28475000	25235000	27270000	27275000	25731000	0.998798	0.948154
Q9UHN6	Transmembrane protein 2	TMEM2	4	3987700	3004100	3210500	4751600	5988200	3753200	5908900	8919000	1.643	0.0634032
Q32MZ4	Leucine-rich repeat flightless-interacting protein 1	LRRFIP1	7	6090100	9647700	8890800	7350700	7573300	5256900	4992500	8041000	0.808764	0.219724
P46060	Ran GTPase-activating protein 1	RANGAP1	16	53624000	49759000	73529000	59501000	57126000	51791000	54084000	51049000	0.905407	0.35211
O43615	Mitochondrial import inner membrane translocase subunit TIM44	TIMM44	8	12303000	12294000	7893900	10387000	8484600	12042000	9642100	14088000	1.03216	0.86115
P54727	UV excision repair protein RAD23 homolog B	RAD23B	12	126660000	83509000	96637000	95153000	120840000	91115000	122360000	96900000	1.07278	0.547765
O60568	Procollagen-lysine,2-oxoglutarate 5-dioxygenase 3	PLOD3	13	21260000	21442000	23228000	16133000	21094000	24654000	20350000	22816000	1.08348	0.375304
Q9UM22	Mammalian ependymin-related protein 1	EPDR1	1	3926100	4036100	4241100	4113000	4170900	5592900	6557200	6078000	1.3728	0.023322
Q8TBC4	NEDD8-activating enzyme E1 catalytic subunit	UBA3	3	1497600	1370100	4891300	8143400	10322000	1966100	3792700	4280600	1.2804	0.554784
Q96S55	ATPase WRNIP1	WRNIP1	8	14378000	16889000	11627000	12904000	16582000	17043000	15468000	14929000	1.14739	0.138862
Q6P2Q9	Pre-mRNA-processing-splicing factor 8	PRPF8	50	77839000	110800000	104360000	78493000	102830000	107340000	97293000	117190000	1.1431	0.202326
Q96DV4	39S ribosomal protein L38, mitochondrial	MRPL38	3	1541700	5338400	5131700	2958800	2739000	7233700	3407600	4904500	1.22138	0.524652
Q9Y230	RuvB-like 2	RUVBL2	11	29459000	22359000	25320000	22335000	20879000	27161000	24841000	23151000	0.965408	0.712658
O75170	Serine/threonine-protein phosphatase 6 regulatory subunit 2	PPP6R2	3	2555700	3549200	3869900	5908900	4023600	2289000	3511900	3242800	0.822686	0.448578
Q15286	Ras-related protein Rab-35	RAB35	4	3089400	4917700	4758500	5265900	5729100	5190900	5085300	7446700	1.30061	0.119536
P46926	Glucosamine-6-phosphate isomerase 1	GNPDA1	4	2630000	3522300	3653100	3509000	3103300	3137500	3147000	3554600	0.97206	0.802728
Q8TAT6	Nuclear protein localization protein 4 homolog	NPLOC4	9	8532400	11508000	15169000	13339000	17278000	12531000	9949300	16437000	1.15751	0.448497
Q14160	Protein scribble homolog	SCRIB	5	5205900	3521100	2187000	3671900	4519500	4034300	3908800	3357800	1.08464	0.54292
Q9NYL9	Tropomodulin-3	TMOD3	7	9613900	11669000	10758000	9209700	10286000	12148000	9122400	16172000	1.15704	0.385634
O43813	LanC-like protein 1	LANCL1	6	18554000	22223000	14801000	11712000	14358000	18946000	16551000	20850000	1.05075	0.686663
P32754	4-hydroxyphenylpyruvate dioxygenase	HPD	8	16339000	15683000	19410000	22825000	15460000	18246000	20664000	22992000	1.04181	0.743782
P61586	Transforming protein RhoA	RHOA	5	25858000	18084000	18061000	20568000	20296000	19071000	18608000	18692000	0.928498	0.49065
O95819	Mitogen-activated protein kinase kinase kinase kinase 4	MAP4K4	15	21917000	23517000	18947000	18138000	20700000	17914000	18597000	26845000	1.01863	0.923132
P20700	Lamin-B1	LMNB1	18	29983000	45102000	47719000	39060000	35469000	42554000	41305000	53178000	1.06575	0.625301
P12268	Inosine-5-monophosphate dehydrogenase 2	IMPDH2	22	119680000	121080000	115560000	113120000	83841000	97063000	88561000	122110000	0.834132	0.0635957
Q13435	Splicing factor 3B subunit 2	SF3B2	37	165060000	155090000	130600000	152250000	165070000	122700000	119650000	133400000	0.896882	0.246525
O43719	HIV Tat-specific factor 1	HTATSF1	5	5360600	2719600	2308100	3404100	4503600	3387900	2766300	3861800	1.05272	0.689137
P35610	Sterol O-acyltransferase 1	SOAT1	2	2723600	2086600	2586000	1443800	2298500	1586400	1422200	1295400	0.746889	0.183488
P11413	Glucose-6-phosphate 1-dehydrogenase	G6PD	22	99445000	106620000	118700000	94888000	69576000	84929000	77058000	99405000	0.788671	0.0360448
P13639	Elongation factor 2	EEF2	69	1185100000	1111400000	1004100000	878530000	1121800000	1056300000	1079600000	1160500000	1.05721	0.405654
P15880	40S ribosomal protein S2	RPS2	15	127680000	161000000	151300000	155940000	129900000	186260000	186260000	204310000	1.18595	0.205079
Q9UBU6	Protein FAM8A1	FAM8A1	2	3983800	4340500	3970600	2997700	3794300	0	2708700	4526800	0.961668	0.756649
P62807;Q99880;Q99879;Q99877;Q93079;Q5QNW6;P58876;O60814;P57053;Q96A08	Histone H2B type 1-C/E/F/G/I;Histone H2B type 1-L;Histone H2B type 1-M;Histone H2B type 1-N;Histone H2B type 1-H;Histone H2B type 2-F;Histone H2B type 1-D;Histone H2B type 1-K;Histone H2B type F-S;Histone H2B type 1-A	HIST1H2BC;HIST1H2BL;HIST1H2BM;HIST1H2BN;HIST1H2BH;HIST2H2BF;HIST1H2BD;HIST1H2BK;H2BFS;HIST1H2BA	2	4396000	5639700	3615000	4255200	6304700	9227500	7741600	8553300	1.77746	0.00338853
Q562R1	Beta-actin-like protein 2	ACTBL2	2	2581700	1700700000	843940000	2185400	1268400000	1302500	3718500	1537000000	1.10238	0.988702
P31947	14-3-3 protein sigma	SFN	9	77449000	108610000	100890000	86715000	102510000	108840000	91944000	88782000	1.04927	0.572758
P08758	Annexin A5	ANXA5	33	987050000	1237800000	1205000000	977800000	960940000	1245600000	1116800000	968500000	0.973725	0.774704
O75694	Nuclear pore complex protein Nup155	NUP155	13	25092000	14491000	22368000	21849000	23683000	30150000	22021000	17037000	1.10848	0.563605
P55196	Afadin	MLLT4	15	28030000	33652000	24989000	22564000	28335000	29178000	27914000	27408000	1.03296	0.635015
P46777	60S ribosomal protein L5	RPL5	28	423580000	475760000	332070000	365610000	350120000	360430000	515560000	397960000	1.01694	0.908849
P34949	Mannose-6-phosphate isomerase	MPI	7	16382000	17418000	17039000	18184000	15015000	16294000	18636000	14770000	0.937586	0.280602
P35579	Myosin-9	MYH9	2	581190	288770	365880	295930	0	498010	577200	596580	1.45521	0.0898068
Q9UHB9	Signal recognition particle subunit SRP68	SRP68	16	35963000	44194000	32010000	44728000	32447000	38564000	37073000	37380000	0.927142	0.479472
P20810	Calpastatin	CAST	8	9627600	13891000	11548000	10949000	11074000	9005400	9774400	12650000	0.923682	0.485722
P02795;P80297;P13640	Metallothionein-2;Metallothionein-1X;Metallothionein-1G	MT2A;MT1X;MT1G	1	1588600	0	0	2988700	1538000	0	1677300	3108000	0.920965	0.833334
P48739	Phosphatidylinositol transfer protein beta isoform	PITPNB	2	9118000	9161400	9960300	9415700	9419300	9764100	14246000	10307000	1.16149	0.209657
P50895	Basal cell adhesion molecule	BCAM	20	116040000	95735000	92721000	102870000	102330000	77792000	92294000	91640000	0.893683	0.1834
Q99733	Nucleosome assembly protein 1-like 4	NAP1L4	13	97069000	102060000	112220000	100370000	94027000	91521000	74060000	98176000	0.869	0.084328
O43169	Cytochrome b5 type B	CYB5B	7	148860000	114380000	148290000	189740000	217990000	161980000	187970000	110600000	1.12851	0.572229
Q96AB3	Isochorismatase domain-containing protein 2, mitochondrial	ISOC2	2	32612000	30720000	18040000	29314000	38594000	47010000	28465000	20982000	1.22013	0.452881
Q8TCJ2	Dolichyl-diphosphooligosaccharide--protein glycosyltransferase subunit STT3B	STT3B	10	15730000	17717000	18896000	13792000	11514000	15658000	14660000	17935000	0.903712	0.392506
O95816	BAG family molecular chaperone regulator 2	BAG2	4	8488700	9113200	6357600	4890800	6986800	0	8298000	3365100	0.861916	0.539681
Q9HB71	Calcyclin-binding protein	CACYBP	12	66099000	59949000	50561000	54624000	69150000	59666000	72180000	39935000	1.04194	0.89201
Q14739	Lamin-B receptor	LBR	3	3616200	7723800	6135800	5144800	3125500	3100700	3290200	2285100	0.521715	0.013493
P27824	Calnexin	CANX	35	506200000	360850000	412850000	361890000	347730000	305630000	271440000	378020000	0.793536	0.0775622
P40925	Malate dehydrogenase, cytoplasmic	MDH1	19	245420000	274850000	233620000	271040000	221390000	232950000	283450000	256530000	0.970135	0.645584
P28074	Proteasome subunit beta type-5	PSMB5	8	15151000	12248000	16120000	17766000	19478000	24484000	17011000	25680000	1.41393	0.0340251
P30049	ATP synthase subunit delta, mitochondrial	ATP5D	3	13304000	6848600	10389000	7174300	12137000	11446000	13977000	11769000	1.30791	0.113822
O43837	Isocitrate dehydrogenase [NAD] subunit beta, mitochondrial	IDH3B	7	9607400	12729000	9429200	13338000	10994000	9312500	33162000	15513000	1.5294	0.339089
Q9UBV2	Protein sel-1 homolog 1	SEL1L	8	33349000	20023000	23671000	25075000	24561000	22152000	25921000	25720000	0.963141	0.849922
P62942	Peptidyl-prolyl cis-trans isomerase FKBP1A	FKBP1A	4	38402000	26341000	28791000	33315000	40744000	39740000	44012000	36879000	1.27218	0.0332219
Q9BQG0	Myb-binding protein 1A	MYBBP1A	28	29561000	38873000	38767000	32712000	32464000	40841000	32894000	47453000	1.0982	0.468938
O75381	Peroxisomal membrane protein PEX14	PEX14	2	2200400	2752100	2376500	1547100	2784000	1605300	1958800	2596100	1.00767	0.977777
Q8IZ83	Aldehyde dehydrogenase family 16 member A1	ALDH16A1	11	36850000	24564000	26397000	25976000	25911000	22460000	30611000	31698000	0.972695	0.852449
Q9HD26	Golgi-associated PDZ and coiled-coil motif-containing protein	GOPC	3	2792700	3102800	3822300	3282100	2381300	2307200	3911800	3546500	0.934376	0.576474
Q8N163	Cell cycle and apoptosis regulator protein 2	CCAR2	27	144780000	99931000	91197000	117910000	169250000	106540000	164310000	121490000	1.23748	0.21818
Q14344	Guanine nucleotide-binding protein subunit alpha-13	GNA13	2	900770	2205400	2600600	1916000	2362900	2620800	3146700	1872000	1.31217	0.253424
Q9Y371	Endophilin-B1	SH3GLB1	1	3819400	1308000	3070000	2120900	3576200	1424400	3965300	3003500	1.16002	0.652972
P09543	2,3-cyclic-nucleotide 3-phosphodiesterase	CNP	17	53479000	80776000	59805000	60539000	48403000	61475000	58264000	76816000	0.962133	0.766856
Q96LD4	Tripartite motif-containing protein 47	TRIM47	5	2149100	0	2236500	1956600	2011500	1674000	1629000	3613700	1.05581	0.998776
Q9H3P7	Golgi resident protein GCP60	ACBD3	7	29587000	23513000	21864000	19880000	20976000	17818000	25554000	23153000	0.922578	0.519717
Q15942	Zyxin	ZYX	7	13529000	9319200	8153400	7059000	20294000	9585200	8923300	12056000	1.33625	0.297925
Q9UJY4	ADP-ribosylation factor-binding protein GGA2	GGA2	5	3869000	6357700	3671100	3042900	3701000	3186500	3862000	5137300	0.937789	0.836341
Q9BQE5	Apolipoprotein L2	APOL2	4	0	0	1961700	1948400	2796100	2485700	2403200	0	1.31028	1
Q5T1M5	FK506-binding protein 15	FKBP15	1	841110	849190	515030	617570	980970	547600	470510	974870	1.05351	0.931847
P19387	DNA-directed RNA polymerase II subunit RPB3	POLR2C	1	0	0	0	0	0	998200	2501900	1476200	+inf	0
Q9UBQ0	Vacuolar protein sorting-associated protein 29	VPS29	3	1906300	2367200	1808100	2684700	2933200	2985100	2853000	3804900	1.43461	0.0181944
Q04637	Eukaryotic translation initiation factor 4 gamma 1	EIF4G1	23	59266000	50702000	51573000	48465000	53428000	51557000	54980000	54087000	1.01927	0.650368
P50991	T-complex protein 1 subunit delta	CCT4	33	339130000	343230000	374540000	332670000	279860000	316060000	305980000	332680000	0.888462	0.0375251
P67870	Casein kinase II subunit beta	CSNK2B	2	4721200	8657900	7500500	8745300	6969500	10000000	11533000	10095000	1.30287	0.176214
Q12931	Heat shock protein 75 kDa, mitochondrial	TRAP1	31	195920000	164340000	168840000	141490000	168520000	182910000	141660000	179840000	1.00349	0.955283
Q8TF05	Serine/threonine-protein phosphatase 4 regulatory subunit 1	PPP4R1	3	2024900	2035900	3286700	1669200	2232300	2624600	1884700	1975100	0.966728	0.957146
P20142	Gastricsin	PGC	1	0	1876300	509910	1012700	1814000	1557600	895350	0	1.25539	0.501134
Q96AY3	Peptidyl-prolyl cis-trans isomerase FKBP10	FKBP10	14	101030000	93518000	91383000	82257000	70742000	69317000	60618000	75886000	0.751146	0.00397002
P62820	Ras-related protein Rab-1A	RAB1A	11	93969000	85262000	72898000	95793000	107150000	103320000	110230000	114960000	1.25218	0.0134221
O00483	Cytochrome c oxidase subunit NDUFA4	NDUFA4	1	2977300	0	2474600	3312600	2805700	3751000	4826100	3647700	1.2862	0.168112
P55060	Exportin-2	CSE1L	28	301790000	192920000	251580000	214570000	279330000	229460000	282250000	253880000	1.08748	0.417194
P0DN76;Q01081	Splicing factor U2AF 35 kDa subunit	U2AF1	6	21758000	24052000	24354000	16438000	18220000	23886000	24975000	29586000	1.11622	0.46023
Q7Z3D6	UPF0317 protein C14orf159, mitochondrial	C14orf159	2	2710000	704220	2218800	2658000	0	1611400	2511700	1214000	0.858294	0.866055
Q14166	Tubulin--tyrosine ligase-like protein 12	TTLL12	20	71205000	57695000	60726000	55703000	70197000	68224000	55597000	64463000	1.05361	0.508339
Q9H583	HEAT repeat-containing protein 1;HEAT repeat-containing protein 1, N-terminally processed	HEATR1	11	6280900	7821900	8097500	9536600	11504000	8682100	9746700	9175500	1.23227	0.0883026
O75822	Eukaryotic translation initiation factor 3 subunit J	EIF3J	8	15588000	15456000	15090000	16718000	19772000	14411000	13827000	13005000	0.970773	0.67218
P62308;A8MWD9	Small nuclear ribonucleoprotein G;Putative small nuclear ribonucleoprotein G-like protein 15	SNRPG;SNRPGP15	3	10687000	10381000	6297200	14400000	17104000	11764000	18393000	12040000	1.41987	0.122569
Q7L1Q6	Basic leucine zipper and W2 domain-containing protein 1	BZW1	12	43159000	41211000	60256000	41407000	49357000	39757000	65388000	71218000	1.21333	0.306872
O95861	3(2),5-bisphosphate nucleotidase 1	BPNT1	11	8689500	9919400	8291000	12856000	7789100	10547000	9436700	10230000	0.955903	0.769075
Q9NRR5	Ubiquilin-4	UBQLN4	3	2212300	1283900	1955500	2057800	2054600	2444900	1547900	2012400	1.07328	0.629352
Q08257	Quinone oxidoreductase	CRYZ	14	70520000	85110000	75015000	71692000	78409000	90314000	91913000	103440000	1.20421	0.041167
P12270	Nucleoprotein TPR	TPR	42	51402000	72220000	39775000	25243000	66842000	44084000	44160000	73529000	1.21191	0.398633
Q9BSJ8	Extended synaptotagmin-1	ESYT1	19	120720000	98203000	104380000	98445000	112940000	102960000	117130000	127130000	1.09108	0.226398
P60228	Eukaryotic translation initiation factor 3 subunit E	EIF3E	5	23007000	16551000	13462000	9802300	12561000	18207000	17867000	22542000	1.13299	0.509855
Q8NBF2	NHL repeat-containing protein 2	NHLRC2	4	5504900	6757100	4564500	5025300	3999200	5136800	4339500	6053700	0.893711	0.393046
P46977	Dolichyl-diphosphooligosaccharide--protein glycosyltransferase subunit STT3A	STT3A	14	33181000	33667000	43032000	33366000	22416000	39911000	35318000	44072000	0.989326	0.834799
P62995	Transformer-2 protein homolog beta	TRA2B	6	15893000	13631000	9095800	17313000	11875000	10539000	12092000	10121000	0.797868	0.228428
P07148	Fatty acid-binding protein, liver	FABP1	14	669300000	570610000	593750000	861370000	834140000	611870000	872650000	371980000	0.998371	0.855948
P55327	Tumor protein D52	TPD52	5	27350000	23310000	24041000	17435000	21582000	14953000	10560000	22370000	0.75394	0.168619
Q9UBB4	Ataxin-10	ATXN10	11	22826000	19967000	22500000	19216000	18892000	19654000	16558000	27025000	0.971837	0.717417
Q8N4V1	Membrane magnesium transporter 1	MMGT1	1	0	0	3270100	0	4040600	4302600	5423100	4533500	1.39902	1
O75436	Vacuolar protein sorting-associated protein 26A	VPS26A	3	4864800	6471000	4377200	5591500	4529700	9170100	4600300	5332300	1.10927	0.720195
P51571	Translocon-associated protein subunit delta	SSR4	5	19556000	12374000	10815000	29664000	52954000	24078000	43177000	16225000	1.88421	0.136227
P48643	T-complex protein 1 subunit epsilon	CCT5	37	332370000	382530000	438310000	364000000	326990000	389820000	343880000	405400000	0.966307	0.682119
P62851	40S ribosomal protein S25	RPS25	14	134030000	154530000	113740000	146750000	151510000	151010000	166410000	149450000	1.12627	0.133145
Q9BYN8	28S ribosomal protein S26, mitochondrial	MRPS26	3	6145600	4185900	3961500	6525400	4824800	3564600	4014500	4629000	0.818166	0.256226
Q9P2R3	Rabankyrin-5	ANKFY1	4	3970700	3324000	2806500	4268600	3101300	1536200	2706500	3151800	0.730407	0.129727
Q9Y5Q8	General transcription factor 3C polypeptide 5	GTF3C5	2	3177700	2193200	2536600	3979100	2894700	3113200	0	3113500	1.02316	0.770012
O75937	DnaJ homolog subfamily C member 8	DNAJC8	9	33545000	32629000	21765000	19469000	37051000	22134000	38919000	29681000	1.18972	0.38224
P06730	Eukaryotic translation initiation factor 4E	EIF4E	4	13135000	9903700	14232000	10301000	10049000	12220000	10525000	19868000	1.107	0.693354
P53582	Methionine aminopeptidase 1	METAP1	4	19378000	26828000	18787000	19158000	24671000	22243000	22933000	26426000	1.14405	0.174816
P53701	Cytochrome c-type heme lyase	HCCS	3	0	1754600	0	1647800	1704900	1526900	1456400	2228600	1.01646	0.986045
P39656	Dolichyl-diphosphooligosaccharide--protein glycosyltransferase 48 kDa subunit	DDOST	16	123110000	152490000	183190000	171020000	99090000	182460000	121610000	134230000	0.853257	0.305836
Q96KR1	Zinc finger RNA-binding protein	ZFR	9	9928800	16619000	9876600	10604000	8946600	10664000	6491900	13097000	0.833528	0.36751
P09651;Q32P51	Heterogeneous nuclear ribonucleoprotein A1;Heterogeneous nuclear ribonucleoprotein A1, N-terminally processed;Heterogeneous nuclear ribonucleoprotein A1-like 2	HNRNPA1;HNRNPA1L2	23	485320000	614770000	615300000	621660000	631880000	688170000	639540000	566670000	1.08096	0.307058
P11766	Alcohol dehydrogenase class-3	ADH5	16	108640000	104090000	86327000	128150000	84981000	106980000	137580000	100760000	1.00724	0.989026
Q9UHA4	Ragulator complex protein LAMTOR3	LAMTOR3	1	3779200	2856700	0	5999000	3488900	4616300	3188200	0	0.893826	0.7664
Q92575	UBX domain-containing protein 4	UBXN4	6	7445300	9762600	7578400	8586400	7834900	7367500	9001700	7716100	0.956476	0.607834
Q9UKD2	mRNA turnover protein 4 homolog	MRTO4	8	6169000	12464000	4462200	8799500	7340700	9776700	11977000	12951000	1.31826	0.248875
P78406	mRNA export factor	RAE1	4	6986000	8614800	7760200	6166000	5936100	9428800	10064000	7329000	1.10942	0.546139
Q969X6	Cirhin	CIRH1A	3	0	1634100	865550	1962400	0	1367800	1852800	0	1.08266	0.737925
Q9Y2Q3	Glutathione S-transferase kappa 1	GSTK1	8	20660000	19653000	22702000	23953000	29594000	25982000	28627000	26388000	1.27163	0.00446195
P62987;P0CG47;P0CG48	Ubiquitin-60S ribosomal protein L40;Ubiquitin;60S ribosomal protein L40;Polyubiquitin-B;Ubiquitin;Polyubiquitin-C;Ubiquitin	UBA52;UBB;UBC	1	3371400	4860900	453000	1586700	1539800	2611800	753140	5052100	0.969319	0.924433
Q6GMV3	Putative peptidyl-tRNA hydrolase PTRHD1	PTRHD1	2	6533900	1484200	3165400	2544400	7469200	4606800	6826300	3270100	1.61513	0.164663
P54802	Alpha-N-acetylglucosaminidase;Alpha-N-acetylglucosaminidase 82 kDa form;Alpha-N-acetylglucosaminidase 77 kDa form	NAGLU	5	9800200	6076300	11127000	12850000	9823500	11842000	14069000	6739700	1.06576	0.784587
Q9Y2V2	Calcium-regulated heat stable protein 1	CARHSP1	6	40705000	33501000	61133000	79251000	36424000	55228000	30131000	34713000	0.729279	0.267684
Q53H82	Beta-lactamase-like protein 2	LACTB2	4	1737700	2062300	1937100	2292100	1964000	3586700	2522300	3440800	1.43399	0.0700998
P30711	Glutathione S-transferase theta-1	GSTT1	4	9783800	7362200	11597000	12347000	18580000	12594000	15738000	7784000	1.33113	0.29241
Q14203	Dynactin subunit 1	DCTN1	13	23163000	13991000	11913000	17353000	17181000	9525000	13471000	12764000	0.797064	0.292692
P07355;A6NMY6	Annexin A2;Putative annexin A2-like protein	ANXA2;ANXA2P2	2	1546300	2128800	1546200	1606800	0	2168400	2281200	1592600	1.17987	0.26971
Q71DI3;Q16695;P84243;P68431;Q6NXT2	Histone H3.2;Histone H3.1t;Histone H3.3;Histone H3.1;Histone H3.3C	HIST2H3A;HIST3H3;H3F3A;HIST1H3A;H3F3C	3	14723000	17012000	13951000	18385000	22308000	20191000	25180000	18261000	1.34132	0.0204999
Q99426	Tubulin-folding cofactor B	TBCB	8	12939000	14827000	14288000	12680000	12594000	12137000	13604000	17110000	1.01299	0.947956
P04179	Superoxide dismutase [Mn], mitochondrial	SOD2	14	169050000	134950000	149850000	235000000	232850000	223710000	206140000	218970000	1.27992	0.0717452
P14209	CD99 antigen	CD99	2	13139000	9219500	6860800	0	10339000	8129200	9584900	10642000	0.993225	0.898394
P62269	40S ribosomal protein S18	RPS18	20	227540000	196490000	175290000	237210000	267500000	220260000	295150000	205960000	1.18211	0.182092
P55010	Eukaryotic translation initiation factor 5	EIF5	9	24110000	16507000	16704000	16503000	18835000	14394000	17384000	18147000	0.931404	0.595828
Q9UHG3	Prenylcysteine oxidase 1	PCYOX1	15	55738000	57627000	79242000	71040000	47243000	54730000	49326000	45264000	0.745554	0.0225261
O43237	Cytoplasmic dynein 1 light intermediate chain 2	DYNC1LI2	6	2311800	4091900	3440000	2952900	2317000	3316700	1456800	2132400	0.720731	0.14481
Q96P48	Arf-GAP with Rho-GAP domain, ANK repeat and PH domain-containing protein 1	ARAP1	2	3457100	0	3277300	3747400	3117500	0	4201500	3683500	1.04968	0.676152
Q9UI12	V-type proton ATPase subunit H	ATP6V1H	4	5134200	4342700	4299900	3796700	3113400	4716500	3399000	4387700	0.888645	0.32026
Q92542	Nicastrin	NCSTN	6	8230600	3039400	6674900	7189800	11813000	9819100	6020200	4938500	1.29665	0.418111
Q9P2E9	Ribosome-binding protein 1	RRBP1	138	1406500000	1099200000	925870000	1005800000	1228600000	765600000	950300000	1148200000	0.922326	0.566209
P20962	Parathymosin	PTMS	5	30754000	35314000	22620000	32283000	35700000	19078000	27259000	28251000	0.91169	0.545758
Q9H0N0	Ras-related protein Rab-6C	RAB6C	1	0	0	1129700	0	2621100	0	2145400	2486600	2.14013	1
P23588	Eukaryotic translation initiation factor 4B	EIF4B	21	42677000	73298000	63486000	54040000	44721000	48351000	25002000	60795000	0.766031	0.230633
Q9Y2A7	Nck-associated protein 1	NCKAP1	4	2144800	2396400	2347800	1676700	2062900	2547400	1637300	3108300	1.09225	0.678805
Q15555	Microtubule-associated protein RP/EB family member 2	MAPRE2	9	13497000	19725000	19512000	15336000	16734000	16152000	14227000	17837000	0.954165	0.733055
P13667	Protein disulfide-isomerase A4	PDIA4	76	2259300000	2212400000	2008900000	1941000000	1651200000	1597700000	1602300000	1743300000	0.783046	0.0011591
P42704	Leucine-rich PPR motif-containing protein, mitochondrial	LRPPRC	95	1118600000	934620000	1205700000	1033100000	1143900000	1098300000	1026700000	944730000	0.981736	0.817364
Q8N183	Mimitin, mitochondrial	NDUFAF2	4	15390000	14583000	13741000	13735000	12995000	12818000	9334200	15988000	0.890097	0.288103
P36871	Phosphoglucomutase-1	PGM1	27	165570000	109570000	122230000	123170000	117350000	88404000	131620000	106480000	0.85268	0.244519
P17066;P48741	Heat shock 70 kDa protein 6;Putative heat shock 70 kDa protein 7	HSPA6;HSPA7	2	78026000	67345000	86953000	60512000	60712000	62136000	42699000	83517000	0.850524	0.300044
Q15637	Splicing factor 1	SF1	18	86401000	81373000	72422000	75759000	83881000	84080000	68041000	84853000	1.01551	0.844888
Q9Y2Z0	Suppressor of G2 allele of SKP1 homolog	SUGT1	6	17926000	15567000	14452000	14752000	9815600	18147000	15588000	17756000	0.977824	0.766459
O75356	Ectonucleoside triphosphate diphosphohydrolase 5	ENTPD5	6	7131200	5966900	6068800	7572700	7943200	11130000	15120000	5320500	1.47772	0.2137
P54725	UV excision repair protein RAD23 homolog A	RAD23A	2	2788500	1417200	1157600	1110000	1057200	0	913350	1481400	0.711013	0.351381
O75534	Cold shock domain-containing protein E1	CSDE1	18	32113000	25648000	32096000	27044000	26578000	28566000	27665000	34922000	1.0071	0.941671
Q13428	Treacle protein	TCOF1	24	48466000	51831000	37397000	41720000	47256000	36677000	34612000	53515000	0.959011	0.707746
Q96GQ7	Probable ATP-dependent RNA helicase DDX27	DDX27	15	32043000	31735000	28441000	21261000	24963000	29419000	28903000	30465000	1.00238	0.908733
Q53T59	HCLS1-binding protein 3	HS1BP3	3	2049200	4264800	2791800	3433000	3975800	2420500	3658300	4531700	1.16329	0.465174
P43490	Nicotinamide phosphoribosyltransferase	NAMPT	7	16739000	11064000	14171000	15237000	12735000	9168300	19234000	13790000	0.960083	0.729032
Q8WUM4	Programmed cell death 6-interacting protein	PDCD6IP	28	111560000	75755000	84918000	84837000	103450000	90508000	100190000	96130000	1.093	0.303155
Q9NYH9	U3 small nucleolar RNA-associated protein 6 homolog	UTP6	4	20937000	15736000	11002000	7445900	10938000	6265900	12330000	10117000	0.719344	0.32574
O00410	Importin-5	IPO5	35	164580000	97943000	138620000	117110000	134460000	95831000	116890000	93043000	0.849438	0.311439
Q08J23	tRNA (cytosine(34)-C(5))-methyltransferase	NSUN2	16	26220000	28000000	27339000	24986000	25170000	31015000	25960000	33509000	1.08549	0.342225
O43598	2-deoxynucleoside 5-phosphate N-hydrolase 1	DNPH1	3	6454700	7247500	8539700	13104000	10586000	10704000	11790000	8875300	1.18699	0.264196
Q07817	Bcl-2-like protein 1	BCL2L1	2	5002200	4889400	5304300	5306100	7823400	6449900	7748700	6983900	1.41478	0.000480289
O43143	Pre-mRNA-splicing factor ATP-dependent RNA helicase DHX15	DHX15	24	120920000	88105000	95630000	95841000	100500000	102860000	94530000	101310000	0.996764	0.96266
Q96TA2	ATP-dependent zinc metalloprotease YME1L1	YME1L1	2	3265500	2563800	2782600	2894500	2541700	3656300	2498200	2886000	1.00659	0.987953
Q9H814	Phosphorylated adapter RNA export protein	PHAX	1	1179500	1383100	1543000	1426600	1556200	1759900	1575800	833870	1.03499	0.997699
P04632	Calpain small subunit 1	CAPNS1	2	6025500	2978400	4102300	3460900	5009700	4669400	4449200	6303400	1.23327	0.214246
Q92544	Transmembrane 9 superfamily member 4	TM9SF4	6	38110000	23503000	36727000	26465000	28209000	29478000	29479000	27537000	0.919058	0.617859
P27338	Amine oxidase [flavin-containing] B	MAOB	6	6590400	4506500	6664200	9558600	8887500	7335400	8779700	9291300	1.25528	0.16211
Q9UL46	Proteasome activator complex subunit 2	PSME2	19	193050000	215580000	241880000	223910000	179500000	252050000	210480000	220510000	0.986414	0.840575
Q5QJE6	Deoxynucleotidyltransferase terminal-interacting protein 2	DNTTIP2	4	2731800	2001100	2171500	2064400	3377800	3954900	0	3482100	1.60777	0.00351529
Q9Y490	Talin-1	TLN1	78	391430000	331120000	297180000	298520000	405260000	338610000	406720000	393700000	1.17147	0.0825029
Q9NW13	RNA-binding protein 28	RBM28	5	2299000	2203300	2821000	3703400	2555200	4233900	3348500	3856300	1.26909	0.184383
P46379	Large proline-rich protein BAG6	BAG6	17	52811000	38244000	42706000	37508000	50272000	45844000	45847000	37558000	1.04818	0.626818
Q15427	Splicing factor 3B subunit 4	SF3B4	3	6937100	4039000	6580500	4567600	5053700	5843400	4210100	6028900	0.955338	0.85874
Q13126	S-methyl-5-thioadenosine phosphorylase	MTAP	8	27272000	31006000	32076000	33074000	32560000	33668000	38664000	39060000	1.16628	0.0514246
Q8IY81	pre-rRNA processing protein FTSJ3	FTSJ3	11	19559000	20314000	16236000	16685000	19495000	23527000	20995000	26825000	1.24793	0.0499954
O43488	Aflatoxin B1 aldehyde reductase member 2	AKR7A2	11	35698000	53976000	42592000	46696000	48839000	45679000	51839000	48044000	1.08627	0.343999
O95197	Reticulon-3	RTN3	2	0	6202200	6582500	5842800	5651500	7431300	0	7097600	1.08337	0.461865
Q9H479	Fructosamine-3-kinase	FN3K	5	4616700	8027400	5219100	5821300	4074400	9045500	5347500	7389200	1.09171	0.772073
Q13045	Protein flightless-1 homolog	FLII	5	5122500	4841500	4126900	3778300	4159000	5541800	4580600	4174800	1.03285	0.748142
P62304	Small nuclear ribonucleoprotein E	SNRPE	2	38110000	45712000	29187000	60452000	38537000	40732000	52562000	24053000	0.898669	0.642214
Q06323	Proteasome activator complex subunit 1	PSME1	20	216520000	301930000	302720000	274220000	258080000	298170000	285080000	259550000	1.00501	0.894043
P61088	Ubiquitin-conjugating enzyme E2 N	UBE2N	9	116850000	99577000	86634000	109660000	135590000	112540000	134140000	98490000	1.16485	0.185469
P31153	S-adenosylmethionine synthase isoform type-2	MAT2A	12	66916000	69502000	57138000	54720000	53934000	59764000	68995000	62210000	0.986414	0.877808
P11279	Lysosome-associated membrane glycoprotein 1	LAMP1	5	39432000	28737000	40298000	27634000	32906000	39390000	30376000	38808000	1.03952	0.701463
Q00765	Receptor expression-enhancing protein 5	REEP5	11	32163000	25956000	31251000	33813000	36844000	37111000	42615000	24821000	1.14781	0.378177
Q06587	E3 ubiquitin-protein ligase RING1	RING1	1	948090	975170	631100	755570	609810	697960	0	1036100	0.944177	0.72061
O60749	Sorting nexin-2	SNX2	8	19659000	22574000	19814000	19624000	19677000	16619000	19348000	24945000	0.986752	0.813653
P49257	Protein ERGIC-53	LMAN1	17	223730000	167660000	197730000	197460000	142310000	153310000	169030000	169910000	0.806733	0.0268628
Q93050	V-type proton ATPase 116 kDa subunit a isoform 1	ATP6V0A1	6	7448500	5945200	6829100	6536800	6080400	8537500	7292000	8220600	1.12597	0.252455
Q9Y295	Developmentally-regulated GTP-binding protein 1	DRG1	3	4615800	7180600	4267700	2911800	3748800	4614200	6705000	7596900	1.1944	0.470745
P55769	NHP2-like protein 1;NHP2-like protein 1, N-terminally processed	NHP2L1	8	44560000	37011000	27550000	41012000	44475000	34240000	54072000	42837000	1.16979	0.300005
Q08752	Peptidyl-prolyl cis-trans isomerase D	PPID	5	4125200	8829500	7331800	9916700	5353400	8235900	4810300	6057900	0.809765	0.455525
Q9NRX2	39S ribosomal protein L17, mitochondrial	MRPL17	3	5347100	6551000	4614300	5708800	6647700	5178200	5619500	6524600	1.0787	0.438562
Q9NQW7	Xaa-Pro aminopeptidase 1	XPNPEP1	8	26823000	18984000	23360000	21166000	25159000	18560000	28095000	18757000	1.00263	0.965764
Q9UQE7	Structural maintenance of chromosomes protein 3	SMC3	4	2376100	2507300	1474800	2233600	1750800	1827600	2090100	2163500	0.911567	0.58274
Q99567	Nuclear pore complex protein Nup88	NUP88	4	5571100	4147200	3406200	2956600	4731400	4304500	3956800	8578400	1.34139	0.267366
Q9Y520	Protein PRRC2C	PRRC2C	3	1495100	1758400	0	1147600	1321700	901340	1284000	1699100	0.887188	0.518085
Q96I25	Splicing factor 45	RBM17	2	0	2925900	2277200	2799000	0	966360	0	2251000	0.603097	0.173989
P60660	Myosin light polypeptide 6	MYL6	5	25901000	27836000	27224000	30179000	39885000	55758000	30141000	44832000	1.53514	0.0217978
O95865	N(G),N(G)-dimethylarginine dimethylaminohydrolase 2	DDAH2	5	3030600	6395400	5830600	5322900	6566200	6848900	4772500	2922700	1.02579	0.968979
Q9NYK5	39S ribosomal protein L39, mitochondrial	MRPL39	6	6197800	8266200	5555600	8609800	11662000	7034100	10691000	9126000	1.34523	0.103968
Q07065	Cytoskeleton-associated protein 4	CKAP4	51	383960000	391760000	385320000	340950000	351870000	349490000	363070000	454910000	1.01155	0.925559
P62891;Q59GN2	60S ribosomal protein L39;Putative 60S ribosomal protein L39-like 5	RPL39;RPL39P5	2	9966900	23004000	13075000	18774000	10173000	18674000	11500000	27407000	1.04527	0.959822
O60493	Sorting nexin-3	SNX3	3	3697100	0	4696500	4531100	8313600	3729300	5375000	4657900	1.28102	0.365392
O94979	Protein transport protein Sec31A	SEC31A	44	217360000	177670000	183490000	191540000	204160000	171390000	199820000	171050000	0.969301	0.644737
Q15393	Splicing factor 3B subunit 3	SF3B3	29	196790000	129800000	164860000	144910000	173620000	146160000	181600000	118200000	0.973631	0.837165
Q9H0U3	Magnesium transporter protein 1	MAGT1	2	4505200	6176700	5835000	4576200	4592000	5345600	5763600	7714200	1.1101	0.506281
P11142	Heat shock cognate 71 kDa protein	HSPA8	55	3264600000	2909000000	2725300000	2445200000	2989400000	2847100000	2810600000	3069500000	1.03284	0.58215
Q9ULR0	Pre-mRNA-splicing factor ISY1 homolog	ISY1	3	2686700	2364500	1675900	2143700	1957800	2023300	3374200	1958500	1.04994	0.843914
P19174	1-phosphatidylinositol 4,5-bisphosphate phosphodiesterase gamma-1	PLCG1	6	12728000	9985500	9109000	6575800	14799000	12462000	12434000	8097000	1.24464	0.279707
P15121	Aldose reductase	AKR1B1	10	31476000	45838000	39216000	37240000	33397000	43293000	38591000	40370000	1.01223	0.86621
A0MZ66	Shootin-1	KIAA1598	4	6928600	4416700	3035300	3390000	5944000	7004300	3717900	3941500	1.15965	0.516865
Q7Z3C6	Autophagy-related protein 9A	ATG9A	2	1057500	1101600	1369400	0	1163000	949490	0	1122000	0.916676	0.453936
Q92572	AP-3 complex subunit sigma-1	AP3S1	2	2653800	2690000	1960000	1560900	3908000	1817700	2974900	4613900	1.50197	0.173277
P06865	Beta-hexosaminidase subunit alpha	HEXA	9	12922000	14205000	18982000	14898000	11556000	20049000	15090000	15146000	1.01367	0.972627
O60684	Importin subunit alpha-7	KPNA6	3	3327500	4110500	3121300	3522400	2825200	3629100	4320300	3186100	0.991407	0.888398
Q01082	Spectrin beta chain, non-erythrocytic 1	SPTBN1	135	348950000	1305300000	1024400000	348920000	479930000	1223600000	854360000	1512500000	1.34444	0.40557
P08397	Porphobilinogen deaminase	HMBS	2	0	2566200	3981800	7262200	0	5458100	6108800	3686400	1.1045	0.644963
Q969V3	Nicalin	NCLN	6	13826000	16568000	20489000	12304000	11138000	13939000	21051000	12390000	0.926108	0.636476
P20674	Cytochrome c oxidase subunit 5A, mitochondrial	COX5A	3	7499200	5442100	5438100	9983800	12385000	8528200	10455000	7618000	1.37453	0.116001
Q9Y2Z4	Tyrosine--tRNA ligase, mitochondrial	YARS2	3	5374800	5530100	3418800	4973700	6753900	4325500	5082400	5437800	1.1193	0.448993
Q15819	Ubiquitin-conjugating enzyme E2 variant 2	UBE2V2	1	4498500	4019100	4087900	5686800	6118700	6536100	8310600	4434100	1.38854	0.0848981
P32119	Peroxiredoxin-2	PRDX2	17	287430000	277180000	281360000	329300000	360680000	349650000	340730000	326950000	1.17251	0.0113097
Q9H6S3	Epidermal growth factor receptor kinase substrate 8-like protein 2	EPS8L2	15	34228000	35762000	26259000	29092000	32824000	36615000	25065000	36524000	1.04537	0.734487
Q06278	Aldehyde oxidase	AOX1	4	0	0	0	0	1678100	0	1278300	1001500	+inf	0
P40227	T-complex protein 1 subunit zeta	CCT6A	32	418820000	439660000	497500000	439800000	413230000	469070000	427980000	453410000	0.98213	0.724265
O00154	Cytosolic acyl coenzyme A thioester hydrolase	ACOT7	12	27996000	22761000	26289000	27229000	14621000	20635000	22671000	21612000	0.762781	0.0426074
Q04446	1,4-alpha-glucan-branching enzyme	GBE1	15	28337000	29096000	25512000	25087000	28311000	25901000	24949000	25478000	0.968593	0.52843
P04844	Dolichyl-diphosphooligosaccharide--protein glycosyltransferase subunit 2	RPN2	24	218280000	209310000	306950000	240600000	177850000	214960000	225660000	194100000	0.833285	0.133198
Q6IN85	Serine/threonine-protein phosphatase 4 regulatory subunit 3A	SMEK1	5	2229200	0	3988000	4524700	5200900	4399800	2592800	11293000	1.63983	0.372413
Q9P2T1	GMP reductase 2	GMPR2	5	4735000	10877000	8620600	12167000	6058800	6790600	11115000	9026000	0.90634	0.798004
Q9BVI4	Nucleolar complex protein 4 homolog	NOC4L	4	6625300	4893300	2827700	5209600	3708300	6526400	7782600	5462200	1.20064	0.454125
O75643	U5 small nuclear ribonucleoprotein 200 kDa helicase	SNRNP200	49	152180000	145680000	177300000	143210000	183100000	154900000	138550000	139480000	0.996216	0.937251
Q86VM9	Zinc finger CCCH domain-containing protein 18	ZC3H18	6	7436800	5849100	2353000	5084600	4855700	2339300	4010600	9628400	1.00533	0.914935
Q32P28	Prolyl 3-hydroxylase 1	LEPRE1	11	16775000	10193000	17481000	9006600	14706000	14767000	13029000	6494600	0.916585	0.725917
P10646	Tissue factor pathway inhibitor	TFPI	2	2494600	8566400	5350700	5816300	2523500	0	3017400	0	0.498551	0.193881
O15027	Protein transport protein Sec16A	SEC16A	3	2390700	3706900	3039900	2591500	3423300	2684200	1686400	4510200	1.04903	0.9991
Q9BZE4	Nucleolar GTP-binding protein 1	GTPBP4	9	7701300	12035000	8636000	11267000	12452000	7104100	11041000	14870000	1.14702	0.553693
Q9BYT8	Neurolysin, mitochondrial	NLN	9	8647500	12172000	9943400	9347400	10744000	16193000	12028000	8682700	1.18792	0.339112
P51148	Ras-related protein Rab-5C	RAB5C	8	25081000	13449000	16983000	22343000	32094000	23225000	35872000	25329000	1.49661	0.0524547
Q99832	T-complex protein 1 subunit eta	CCT7	31	228120000	238060000	257200000	247700000	188240000	248380000	214970000	277660000	0.956924	0.566249
Q96GW9	Methionine--tRNA ligase, mitochondrial	MARS2	3	4440000	2740300	3446900	3394300	4897300	1714900	4942000	3344300	1.06255	0.98195
P50395	Rab GDP dissociation inhibitor beta	GDI2	25	307060000	258810000	230140000	292250000	262030000	264920000	313250000	253430000	1.00493	0.927227
Q9NP79	Vacuolar protein sorting-associated protein VTA1 homolog	VTA1	3	21382000	16688000	12355000	13437000	14770000	12470000	14770000	13554000	0.870064	0.394377
P09132	Signal recognition particle 19 kDa protein	SRP19	4	5029100	4819900	3935200	4378100	4744300	4173600	4529200	5598100	1.04861	0.597063
O95757	Heat shock 70 kDa protein 4L	HSPA4L	18	44143000	35740000	32318000	32897000	38641000	26786000	39554000	35503000	0.968201	0.765296
P20290	Transcription factor BTF3	BTF3	7	40417000	33521000	43546000	46329000	45457000	52241000	42002000	33961000	1.06012	0.65491
P48556	26S proteasome non-ATPase regulatory subunit 8	PSMD8	6	20429000	22544000	26407000	22852000	17765000	33031000	28080000	25217000	1.1286	0.504248
P00439	Phenylalanine-4-hydroxylase	PAH	10	18344000	27681000	32349000	33606000	21966000	29363000	23048000	22035000	0.860975	0.431694
Q02818	Nucleobindin-1	NUCB1	12	19775000	26391000	22940000	20960000	19604000	19908000	16440000	25678000	0.906335	0.380862
Q16650	T-box brain protein 1	TBR1	1	0	5988300	8854000	6388900	4339200	5709800	4756100	4343900	0.676446	0.0296376
Q4G176	Acyl-CoA synthetase family member 3, mitochondrial	ACSF3	5	3431800	4444600	5999300	4899800	3860900	6266500	4732800	4425400	1.02717	0.849515
O43491	Band 4.1-like protein 2	EPB41L2	16	61367000	38845000	26972000	33786000	50049000	32654000	42644000	43925000	1.05157	0.675834
O00273	DNA fragmentation factor subunit alpha	DFFA	5	0	4842100	5877900	5930000	4236700	8696800	6021800	8236600	1.22486	0.446865
O14828	Secretory carrier-associated membrane protein 3	SCAMP3	7	10164000	13468000	11655000	12276000	9044400	10799000	5953600	7351900	0.696947	0.0361557
Q13011	Delta(3,5)-Delta(2,4)-dienoyl-CoA isomerase, mitochondrial	ECH1	17	117100000	131770000	118430000	125600000	116930000	132910000	140740000	124040000	1.04407	0.424527
P51570	Galactokinase	GALK1	20	51276000	55423000	48161000	62828000	58998000	46753000	59077000	55256000	1.01101	0.889563
P23526	Adenosylhomocysteinase	AHCY	29	510650000	538750000	533680000	560470000	408820000	548410000	568480000	593230000	0.988519	0.815169
P16152	Carbonyl reductase [NADPH] 1	CBR1	10	17628000	17487000	15741000	17767000	16447000	20130000	14746000	16197000	0.983927	0.772516
P10586	Receptor-type tyrosine-protein phosphatase F	PTPRF	2	1768100	0	0	1508500	1870600	0	1801100	0	1.12058	0.288678
Q9GZS3	WD repeat-containing protein 61;WD repeat-containing protein 61, N-terminally processed	WDR61	3	0	3299900	5356700	2701500	3351500	3699300	2802800	2765700	0.83328	0.472139
P14550	Alcohol dehydrogenase [NADP(+)]	AKR1A1	16	123930000	136770000	122260000	139320000	109630000	164230000	156950000	126680000	1.06742	0.610915
Q9BXP5	Serrate RNA effector molecule homolog	SRRT	25	57287000	51976000	42091000	42339000	46664000	40101000	40109000	51179000	0.919254	0.43889
O15533	Tapasin	TAPBP	3	8283400	7461000	5880800	7597700	5264300	6634600	10588000	5592000	0.960853	0.692809
P63208	S-phase kinase-associated protein 1	SKP1	13	44492000	33052000	36257000	44731000	49562000	36088000	47929000	41839000	1.10651	0.367378
P23396	40S ribosomal protein S3	RPS3	21	309100000	390120000	405760000	359950000	325860000	426350000	400780000	418160000	1.07251	0.449314
Q9UJU6	Drebrin-like protein	DBNL	7	18411000	19777000	17615000	14123000	15305000	14554000	6928200	16777000	0.766013	0.197893
O00429	Dynamin-1-like protein	DNM1L	15	18816000	15774000	18197000	19392000	17674000	20216000	17204000	19600000	1.03484	0.581736
Q9UHX1	Poly(U)-binding-splicing factor PUF60	PUF60	12	31493000	42515000	46557000	35584000	42282000	34832000	34877000	29611000	0.906839	0.439924
Q14498	RNA-binding protein 39	RBM39	9	33147000	33138000	32678000	26127000	30412000	19014000	35717000	28945000	0.912047	0.471526
P04062	Glucosylceramidase	GBA	2	1879500	1140400	1853500	2952800	2301300	1693400	3797500	1189700	1.14767	0.757042
P14324	Farnesyl pyrophosphate synthase	FDPS	10	48345000	72117000	56355000	67453000	49607000	55643000	67315000	71071000	0.997405	0.994395
P30405	Peptidyl-prolyl cis-trans isomerase F, mitochondrial	PPIF	6	53925000	55769000	47907000	70464000	57285000	57481000	66857000	44426000	0.99116	0.939113
Q96N66	Lysophospholipid acyltransferase 7	MBOAT7	1	983870	0	0	0	0	1223000	0	1259400	1.26155	1
P47755	F-actin-capping protein subunit alpha-2	CAPZA2	5	24282000	25730000	23666000	20917000	31878000	25331000	30815000	19267000	1.13421	0.409244
Q9Y3B8	Oligoribonuclease, mitochondrial	REXO2	3	17430000	8004000	12657000	18258000	24923000	14733000	16084000	10248000	1.17106	0.572108
P45974	Ubiquitin carboxyl-terminal hydrolase 5	USP5	27	127970000	86720000	106000000	98822000	112000000	108310000	97766000	106480000	1.01202	0.818122
P33897	ATP-binding cassette sub-family D member 1	ABCD1	5	7305000	7357000	10483000	6229100	7967100	8391600	9713400	8425600	1.09956	0.382487
Q13423	NAD(P) transhydrogenase, mitochondrial	NNT	7	5729100	6629800	6026400	5290200	4254800	6510800	8294800	6097600	1.06262	0.810867
P61163	Alpha-centractin	ACTR1A	2	0	1843900	4956700	6124600	0	2837600	0	0	0.65862	1
Q6RW13	Type-1 angiotensin II receptor-associated protein	AGTRAP	1	3074800	2599300	3322100	3425900	3527000	3507200	2793700	2818000	1.01802	0.855753
P62424	60S ribosomal protein L7a	RPL7A	26	206650000	266470000	229950000	239200000	243050000	268240000	292070000	284960000	1.155	0.0710971
P07108	Acyl-CoA-binding protein	DBI	7	30269000	19797000	21631000	37782000	37160000	24258000	36810000	21501000	1.09363	0.664092
Q14790	Caspase-8;Caspase-8 subunit p18;Caspase-8 subunit p10	CASP8	3	2599900	3303000	2527900	0	3201500	3966500	5420000	3929400	1.46938	0.0513577
Q9NY33	Dipeptidyl peptidase 3	DPP3	24	128690000	102440000	87959000	101490000	109030000	94586000	124040000	105790000	1.03059	0.729608
Q16822	Phosphoenolpyruvate carboxykinase [GTP], mitochondrial	PCK2	52	766020000	804470000	793670000	872250000	763630000	805660000	872300000	783930000	0.996635	0.933024
P50990	T-complex protein 1 subunit theta	CCT8	46	497840000	515160000	572010000	447900000	431800000	484820000	476210000	548060000	0.954735	0.535844
P43897	Elongation factor Ts, mitochondrial	TSFM	5	26987000	21923000	15381000	15372000	30333000	15665000	31910000	20896000	1.24027	0.383975
Q99856	AT-rich interactive domain-containing protein 3A	ARID3A	11	18464000	15892000	11293000	17384000	13552000	16060000	9142600	10457000	0.780728	0.179706
Q9NXG2	THUMP domain-containing protein 1	THUMPD1	5	10015000	8439300	7336000	7094900	7527100	7389500	7773100	11626000	1.0435	0.811247
O95163	Elongator complex protein 1	IKBKAP	11	18443000	11815000	15522000	13222000	16572000	10859000	15818000	11727000	0.931765	0.62871
P28072	Proteasome subunit beta type-6	PSMB6	6	32818000	32972000	33222000	37938000	36793000	47031000	41513000	54718000	1.31475	0.0281128
Q16629	Serine/arginine-rich splicing factor 7	SRSF7	7	32925000	23206000	21659000	33637000	41018000	32402000	45992000	28017000	1.3231	0.130804
Q14028	Cyclic nucleotide-gated cation channel beta-1	CNGB1	1	1214100	612130	711600	837670	960130	906020	409460	0	0.898873	0.646733
P15311	Ezrin	EZR	23	100860000	129990000	68139000	72965000	125370000	63491000	89749000	129170000	1.09632	0.711578
Q9BR76	Coronin-1B	CORO1B	5	19957000	25149000	22520000	16169000	22161000	25191000	18755000	17684000	0.999952	0.979904
Q9H8Y8	Golgi reassembly-stacking protein 2	GORASP2	11	91585000	66003000	88171000	68324000	71880000	63355000	68655000	66546000	0.861034	0.16612
P39748	Flap endonuclease 1	FEN1	7	16904000	20465000	15172000	19648000	12311000	20556000	18488000	18600000	0.969053	0.760407
P48444	Coatomer subunit delta	ARCN1	25	105730000	112110000	117960000	111220000	94519000	99171000	100640000	96477000	0.874249	0.00229117
O75312	Zinc finger protein ZPR1	ZPR1	4	6855600	5923900	6496600	7276200	9855300	7269400	8475600	4223600	1.12321	0.715926
O15427	Monocarboxylate transporter 4	SLC16A3	8	47462000	44057000	32197000	38215000	35521000	38906000	39606000	49838000	1.01198	0.9002
Q9NTK5	Obg-like ATPase 1	OLA1	18	116340000	113770000	101560000	110180000	89907000	129290000	118600000	142910000	1.08794	0.517991
Q96I24	Far upstream element-binding protein 3	FUBP3	12	30197000	37107000	32755000	31405000	40163000	33624000	33106000	45993000	1.16295	0.159326
P23229	Integrin alpha-6;Integrin alpha-6 heavy chain;Integrin alpha-6 light chain;Processed integrin alpha-6	ITGA6	2	1760900	2396500	2277500	2499700	1302000	2077500	1354700	2146200	0.770085	0.122941
Q5VT66	Mitochondrial amidoxime-reducing component 1	43160	2	0	2307900	1586300	2593400	1720900	3216000	2913700	2147300	1.15581	0.545904
P84090	Enhancer of rudimentary homolog	ERH	4	15826000	11809000	18288000	17828000	12665000	18608000	24528000	17074000	1.14312	0.502465
P62273	40S ribosomal protein S29	RPS29	2	21131000	23614000	15616000	20753000	28609000	33114000	28010000	23198000	1.39225	0.0266322
Q9Y2Q9	28S ribosomal protein S28, mitochondrial	MRPS28	3	8106000	7155400	5362100	4640900	6750000	4983100	6007200	5042800	0.901787	0.576774
Q9NR28	Diablo homolog, mitochondrial	DIABLO	5	15281000	8416400	8797900	16336000	22579000	12457000	19028000	14004000	1.39394	0.167694
O75390	Citrate synthase, mitochondrial	CS	18	199810000	237760000	187100000	223260000	197820000	255730000	246330000	284430000	1.16084	0.171533
Q9NWV8	BRISC and BRCA1-A complex member 1	BABAM1	3	28697000	18932000	12324000	21577000	22483000	10206000	25478000	18594000	0.941506	0.799855
O00170	AH receptor-interacting protein	AIP	10	26487000	28948000	19849000	20634000	24511000	23857000	25509000	27670000	1.05869	0.51222
Q9P258	Protein RCC2	RCC2	5	4404700	4524000	2653900	3820100	5378200	3935600	5043600	4862600	1.24783	0.143282
P22307	Non-specific lipid-transfer protein	SCP2	20	40129000	32784000	34697000	39501000	53139000	39601000	62180000	35882000	1.29699	0.130827
Q6UWM9	UDP-glucuronosyltransferase 2A3	UGT2A3	3	4089700	3778200	3898700	3318600	4186800	4708800	4244600	6029800	1.27078	0.0516909
Q8N5M9	Protein jagunal homolog 1	JAGN1	1	1392400	0	973820	1097400	1196400	1014700	785290	1434300	0.959406	0.769096
Q9BRX5	DNA replication complex GINS protein PSF3	GINS3	2	3875500	2983300	4375100	4980100	5180800	0	4287500	3019900	1.02695	0.919322
Q07666	KH domain-containing, RNA-binding, signal transduction-associated protein 1	KHDRBS1	13	45784000	62825000	47887000	45543000	50397000	54804000	54226000	62161000	1.09676	0.305632
Q9NY61	Protein AATF	AATF	4	4662100	2561200	3958900	4072700	0	3655900	3824700	3477800	0.957804	0.901069
Q9UEY8	Gamma-adducin	ADD3	5	3611000	5256700	4338200	4073600	5147000	4697000	6185500	3902200	1.15349	0.306509
P62277	40S ribosomal protein S13	RPS13	16	148400000	183190000	153110000	188500000	254160000	241390000	223760000	171010000	1.32252	0.0431313
Q00059	Transcription factor A, mitochondrial	TFAM	2	0	0	0	869210	887320	1030000	1064600	0	1.14354	1
P07858	Cathepsin B;Cathepsin B light chain;Cathepsin B heavy chain	CTSB	13	156820000	157920000	154900000	166740000	162620000	168960000	158760000	172380000	1.04139	0.152205
P51580	Thiopurine S-methyltransferase	TPMT	1	927640	1007200	677600	1071500	0	831020	1045800	981150	1.03439	0.755353
P32969	60S ribosomal protein L9	RPL9	9	35342000	33749000	33363000	46927000	47029000	48876000	45097000	46741000	1.25681	0.0272993
P08243	Asparagine synthetase [glutamine-hydrolyzing]	ASNS	16	42358000	46727000	44426000	48761000	42640000	35848000	46949000	40185000	0.908653	0.173289
P68371	Tubulin beta-4B chain	TUBB4B	2	162970000	230250000	163600000	171530000	192090000	185730000	162940000	165800000	0.970083	0.818348
P06748	Nucleophosmin	NPM1	34	1659900000	1792200000	1434400000	1620000000	1806300000	1239900000	1351700000	1558600000	0.915469	0.351938
Q9BRP8	Partner of Y14 and mago	WIBG	5	5886100	10351000	8567500	9814500	6207700	5895000	4339900	8095100	0.708791	0.103871
P30876	DNA-directed RNA polymerase II subunit RPB2	POLR2B	7	6044200	9061400	9151300	9393700	5893500	8177600	8205000	9779500	0.952601	0.75283
O60343	TBC1 domain family member 4	TBC1D4	6	4468400	7292900	6710000	5141200	6555100	7815700	5787400	8704400	1.22234	0.204028
P62701	40S ribosomal protein S4, X isoform	RPS4X	11	61276000	80719000	94779000	94104000	76114000	122630000	101190000	98859000	1.20526	0.233348
P12236	ADP/ATP translocase 3;ADP/ATP translocase 3, N-terminally processed	SLC25A6	1	3361300	5438100	6012400	4755900	3571800	5227000	4027000	5414500	0.932164	0.713286
P05141	ADP/ATP translocase 2;ADP/ATP translocase 2, N-terminally processed	SLC25A5	5	13944000	17353000	19762000	19492000	14883000	27375000	23072000	26322000	1.29909	0.181035
Q969Z0	Protein TBRG4	TBRG4	10	15305000	21510000	23624000	30296000	16685000	24103000	13851000	18847000	0.809897	0.311466
Q9P2J5	Leucine--tRNA ligase, cytoplasmic	LARS	26	58651000	48784000	54449000	48985000	50668000	56220000	43336000	48148000	0.940736	0.407021
P11021	78 kDa glucose-regulated protein	HSPA5	70	6273800000	5704100000	4877200000	5029400000	4822900000	4275900000	5383100000	4884600000	0.884941	0.159182
Q9BRA2	Thioredoxin domain-containing protein 17	TXNDC17	5	21874000	19964000	17832000	22909000	26198000	22477000	20222000	21157000	1.09052	0.316739
Q15046	Lysine--tRNA ligase	KARS	31	124480000	126780000	127700000	103720000	103800000	113170000	98130000	134530000	0.931528	0.412878
Q13596	Sorting nexin-1	SNX1	9	27893000	30503000	23543000	28064000	25960000	26248000	28996000	30736000	1.01761	0.785468
P61221	ATP-binding cassette sub-family E member 1	ABCE1	8	14664000	12747000	14637000	10643000	12624000	12641000	11835000	17599000	1.03811	0.78758
Q6P2E9	Enhancer of mRNA-decapping protein 4	EDC4	12	12131000	17016000	19086000	15759000	12104000	19169000	13388000	14481000	0.924209	0.580084
P53597	Succinyl-CoA ligase [ADP/GDP-forming] subunit alpha, mitochondrial	SUCLG1	14	35187000	38775000	30910000	37013000	35107000	37033000	41508000	44366000	1.11368	0.189342
Q15287	RNA-binding protein with serine-rich domain 1	RNPS1	6	42264000	47941000	26626000	39119000	40542000	34314000	38535000	33556000	0.94227	0.776743
P50502;Q8NFI4	Hsc70-interacting protein;Putative protein FAM10A5	ST13;ST13P5	15	125990000	97533000	93828000	101640000	83649000	101630000	113760000	100770000	0.954219	0.632717
Q8NFH5	Nucleoporin NUP53	NUP35	4	4079000	6512100	9882400	11682000	13135000	6765400	11048000	7007700	1.18039	0.508546
Q9Y3B7	39S ribosomal protein L11, mitochondrial	MRPL11	5	14223000	12755000	9564600	15078000	17245000	10616000	13418000	12672000	1.04514	0.770615
P13797	Plastin-3	PLS3	14	41913000	42415000	37915000	37855000	40705000	35443000	36803000	36672000	0.934571	0.167319
P38435	Vitamin K-dependent gamma-carboxylase	GGCX	7	7823100	10378000	8461900	7077400	11303000	8057500	13374000	6127400	1.15179	0.597617
O00767	Acyl-CoA desaturase	SCD	3	19945000	20796000	13868000	18325000	16884000	11239000	13614000	10161000	0.711575	0.052827
P08754	Guanine nucleotide-binding protein G(k) subunit alpha	GNAI3	3	2660800	2486200	2489500	2535000	2447100	3073400	0	4184400	1.27217	0.159929
Q2TAL8	Glutamine-rich protein 1	QRICH1	1	2122500	1895200	1696900	1640200	2070000	1607000	1718800	2042900	1.01141	0.905909
P41252	Isoleucine--tRNA ligase, cytoplasmic	IARS	38	133080000	100670000	157680000	123940000	131450000	125620000	113110000	109170000	0.930108	0.564779
Q99729	Heterogeneous nuclear ribonucleoprotein A/B	HNRNPAB	15	77881000	106050000	89143000	93324000	79011000	103430000	97514000	109200000	1.06211	0.55807
P62333	26S protease regulatory subunit 10B	PSMC6	18	40855000	57818000	51765000	57400000	52585000	68940000	66790000	63517000	1.21167	0.10075
P12830	Cadherin-1;E-Cad/CTF1;E-Cad/CTF2;E-Cad/CTF3	CDH1	2	6327600	0	3718600	6442400	6471900	4876800	7687200	5554700	1.11853	0.531719
Q5T280	Putative methyltransferase C9orf114	C9orf114	6	5061900	4630200	2868700	3825000	2637200	2557600	0	3104100	0.675292	0.0630805
Q08209	Serine/threonine-protein phosphatase 2B catalytic subunit alpha isoform	PPP3CA	2	5789100	5239500	4747600	4482200	4758300	6356800	4441900	5513100	1.04007	0.736598
O43852	Calumenin	CALU	13	72821000	80174000	103350000	68402000	54097000	66620000	43157000	83547000	0.761888	0.136319
Q15424	Scaffold attachment factor B1	SAFB	12	40358000	28905000	25224000	25412000	30953000	22915000	27993000	31678000	0.946955	0.755224
P43034	Platelet-activating factor acetylhydrolase IB subunit alpha	PAFAH1B1	4	5781200	4142900	4516400	4166800	5580200	4628300	4869800	4721500	1.06409	0.467137
Q969M3	Protein YIPF5	YIPF5	2	3190400	8040700	7047500	6453000	6113900	4806300	2360300	6072600	0.782525	0.435861
Q9NUJ1	Mycophenolic acid acyl-glucuronide esterase, mitochondrial	ABHD10	3	2977500	5607500	7193500	5730700	3834800	11706000	4780300	4704000	1.16346	0.769776
Q9UPT8	Zinc finger CCCH domain-containing protein 4	ZC3H4	1	0	1145500	0	469690	915200	0	0	660570	0.975594	0.913489
Q5JRX3	Presequence protease, mitochondrial	PITRM1	12	17248000	13792000	13159000	17863000	19204000	12916000	23211000	16018000	1.14964	0.428204
P29218	Inositol monophosphatase 1	IMPA1	4	3389100	6003600	6213400	5559600	9285100	8064100	7129500	5251700	1.40465	0.112749
P50851	Lipopolysaccharide-responsive and beige-like anchor protein	LRBA	11	11972000	12849000	14192000	12448000	14508000	12069000	12915000	17952000	1.11626	0.328332
P19338	Nucleolin	NCL	82	2612000000	2544200000	2556700000	2630400000	2434200000	2316000000	2283400000	2402900000	0.91233	0.00169585
Q92797	Symplekin	SYMPK	7	7587400	10181000	12105000	13391000	14621000	12515000	6481000	10780000	1.02618	0.981612
P01011	Alpha-1-antichymotrypsin;Alpha-1-antichymotrypsin His-Pro-less	SERPINA3	6	8939200	22789000	19295000	7984600	5087600	9587400	6759900	7035500	0.482485	0.0697923
Q10713	Mitochondrial-processing peptidase subunit alpha	PMPCA	14	37006000	53818000	37760000	59007000	59423000	46027000	48680000	48779000	1.08166	0.49925
P54819	Adenylate kinase 2, mitochondrial;Adenylate kinase 2, mitochondrial, N-terminally processed	AK2	23	233160000	213150000	194410000	255640000	260640000	199930000	256330000	183840000	1.00489	0.989475
Q8IZL8	Proline-, glutamic acid- and leucine-rich protein 1	PELP1	7	4120800	11554000	8683800	7053100	6877800	8238400	7688900	8093500	0.983665	0.837354
P09110	3-ketoacyl-CoA thiolase, peroxisomal	ACAA1	17	49625000	52602000	60000000	77730000	78377000	69865000	62618000	65935000	1.15352	0.211955
Q7L014	Probable ATP-dependent RNA helicase DDX46	DDX46	17	39385000	47143000	34195000	37852000	37495000	46424000	38597000	38472000	1.01522	0.834045
P23921	Ribonucleoside-diphosphate reductase large subunit	RRM1	12	10219000	10621000	9580400	7191700	7941600	5070700	4901200	9564400	0.73056	0.116636
Q9UF12	Probable proline dehydrogenase 2	PRODH2	2	0	3237500	3208200	2672800	3126100	2636600	0	2674500	0.925284	0.406301
O75083	WD repeat-containing protein 1	WDR1	35	264590000	263670000	239810000	214000000	211270000	245690000	204600000	257900000	0.936247	0.40896
Q8TEM1	Nuclear pore membrane glycoprotein 210	NUP210	3	1432400	5189500	5274800	2738500	3051600	4721200	3043600	4155200	1.02299	0.702041
P10412;P16402	Histone H1.4;Histone H1.3	HIST1H1E;HIST1H1D	5	8245900	11416000	6878200	9328000	10021000	6010700	7902000	10348000	0.955771	0.767633
P54136	Arginine--tRNA ligase, cytoplasmic	RARS	37	170570000	191920000	186600000	174370000	154920000	193270000	171950000	185340000	0.975147	0.640334
O00571	ATP-dependent RNA helicase DDX3X	DDX3X	4	9689100	15502000	34570000	35191000	5743100	27863000	36887000	20329000	0.956504	0.846004
P40121	Macrophage-capping protein	CAPG	3	9147500	9932400	6895100	8332500	6690300	9685200	8737900	8634000	0.983674	0.887443
O76003	Glutaredoxin-3	GLRX3	10	31525000	27266000	20355000	23566000	25592000	27713000	27177000	32147000	1.09655	0.373206
Q16630	Cleavage and polyadenylation specificity factor subunit 6	CPSF6	15	41541000	34920000	41899000	36291000	44978000	47558000	43044000	46976000	1.18044	0.0173756
O95260	Arginyl-tRNA--protein transferase 1	ATE1	4	2698700	2589400	2297400	2410400	1435300	1833800	1637600	3290700	0.820076	0.227132
O60784	Target of Myb protein 1	TOM1	4	5696800	4417700	16397000	9152200	8743000	3774100	7898200	2544400	0.643783	0.333778
P61353	60S ribosomal protein L27	RPL27	10	90202000	110130000	92090000	119200000	131180000	127240000	134710000	123980000	1.25627	0.0158235
Q9UKS6	Protein kinase C and casein kinase substrate in neurons protein 3	PACSIN3	8	14198000	16008000	12699000	14043000	13488000	15754000	14450000	16101000	1.04996	0.45741
Q9Y6C9	Mitochondrial carrier homolog 2	MTCH2	3	0	1722500	0	0	0	0	0	1601100	0.929521	1
Q9NX58	Cell growth-regulating nucleolar protein	LYAR	8	8510400	10576000	5753600	7269000	7547500	6470000	7004600	10664000	0.986829	0.964382
P52735	Guanine nucleotide exchange factor VAV2	VAV2	6	12480000	8310000	6374100	8118700	10593000	7794200	11492000	6830000	1.04043	0.808555
P09874	Poly [ADP-ribose] polymerase 1	PARP1	6	4500800	5502100	4199900	4561800	4226800	5410500	6191300	4546000	1.0858	0.489824
A0AVT1	Ubiquitin-like modifier-activating enzyme 6	UBA6	12	7669500	6879100	19904000	13409000	14576000	9723000	11481000	12412000	1.0069	0.742822
Q16576	Histone-binding protein RBBP7	RBBP7	6	50578000	39843000	27322000	40087000	42421000	25184000	41714000	23988000	0.844624	0.402029
P61019	Ras-related protein Rab-2A	RAB2A	3	3297100	0	4320800	5548800	4479400	5930300	4754000	10547000	1.46453	0.250433
O00487	26S proteasome non-ATPase regulatory subunit 14	PSMD14	7	18907000	26085000	23257000	26323000	22679000	30613000	31783000	25887000	1.17331	0.196406
P23511	Nuclear transcription factor Y subunit alpha	NFYA	1	1025700	1251400	969600	848760	1131200	607130	1547300	701110	0.973454	0.717923
Q8N1G4	Leucine-rich repeat-containing protein 47	LRRC47	16	67587000	57718000	47220000	56043000	63416000	46494000	47107000	51543000	0.912464	0.406962
P62979	Ubiquitin-40S ribosomal protein S27a;Ubiquitin;40S ribosomal protein S27a	RPS27A	5	32467000	39552000	25695000	32328000	37405000	25387000	31175000	35053000	0.992141	0.957001
P18858	DNA ligase 1	LIG1	3	2569900	1661900	2738700	1589400	4431300	1412100	3965700	2960400	1.49178	0.287268
Q8WTW3	Conserved oligomeric Golgi complex subunit 1	COG1	5	2578900	3584100	1737700	2296400	2242200	4159400	3732300	1441200	1.13514	0.797778
Q8NE62	Choline dehydrogenase, mitochondrial	CHDH	15	31662000	26923000	24707000	27885000	24140000	19271000	23966000	29385000	0.870342	0.19629
P18621	60S ribosomal protein L17	RPL17	15	61086000	63522000	51092000	73365000	65095000	66578000	66040000	68856000	1.07028	0.352743
Q15366	Poly(rC)-binding protein 2	PCBP2	10	46276000	70156000	57813000	51068000	38499000	85956000	45047000	75544000	1.08758	0.857291
Q16181	Septin-7	43350	11	13916000	19598000	21664000	16083000	15994000	22083000	18400000	24560000	1.13719	0.382138
P40937	Replication factor C subunit 5	RFC5	3	1520600	1340300	0	1846600	1625900	1451900	2263500	2236300	1.20727	0.299865
P63167	Dynein light chain 1, cytoplasmic	DYNLL1	4	14408000	11180000	12529000	12633000	13826000	11793000	13873000	11904000	1.01273	0.849111
Q99805	Transmembrane 9 superfamily member 2	TM9SF2	6	61714000	60695000	48622000	61314000	68516000	56324000	55607000	62136000	1.04406	0.578619
O95487	Protein transport protein Sec24B	SEC24B	3	2634300	0	1759700	2124000	1837300	1129900	2225400	1678100	0.790584	0.255347
Q96GK7;Q6P2I3	Fumarylacetoacetate hydrolase domain-containing protein 2A;Fumarylacetoacetate hydrolase domain-containing protein 2B	FAHD2A;FAHD2B	4	6100800	5966900	3574700	5317800	0	5795800	5280200	8022100	1.21488	0.320705
Q7KZ85	Transcription elongation factor SPT6	SUPT6H	5	9725900	7247400	2201000	3221500	14608000	5130700	5847400	1796200	1.22265	0.843529
P82930	28S ribosomal protein S34, mitochondrial	MRPS34	4	5758100	5016200	3961200	3917500	5985100	3157000	3912000	4886000	0.961781	0.757693
P41091;Q2VIR3	Eukaryotic translation initiation factor 2 subunit 3;Putative eukaryotic translation initiation factor 2 subunit 3-like protein	EIF2S3;EIF2S3L	10	22981000	33079000	29947000	23828000	19122000	31047000	25506000	29325000	0.955979	0.732344
Q9UHR5	SAP30-binding protein	SAP30BP	2	1891100	2231300	1509800	1159800	1859300	1559200	0	2087300	1.08084	0.606685
P21953	2-oxoisovalerate dehydrogenase subunit beta, mitochondrial	BCKDHB	2	2431200	3948100	4463400	3449600	3254100	5271200	6541400	3586000	1.30509	0.277665
P26583	High mobility group protein B2	HMGB2	10	21124000	25917000	14159000	18437000	21264000	21957000	27750000	22222000	1.17022	0.259602
Q15102	Platelet-activating factor acetylhydrolase IB subunit gamma	PAFAH1B3	9	26618000	21344000	28988000	24981000	26332000	33243000	27905000	29577000	1.14839	0.135222
Q15436	Protein transport protein Sec23A	SEC23A	25	213610000	162130000	142210000	156110000	187000000	141410000	168310000	152370000	0.962956	0.778126
Q9UKY7	Protein CDV3 homolog	CDV3	4	13677000	20020000	26946000	18141000	15714000	16921000	11414000	17584000	0.782304	0.227342
Q9BUL8	Programmed cell death protein 10	PDCD10	1	1539100	2023700	2547400	2047800	1648700	3234900	2244000	3028400	1.24491	0.321969
P61313	60S ribosomal protein L15	RPL15	13	56820000	50432000	56347000	75061000	74537000	71115000	100810000	73939000	1.3425	0.0450061
P62241	40S ribosomal protein S8	RPS8	16	209790000	220970000	222770000	276140000	256580000	244080000	266860000	270550000	1.1166	0.126996
Q14254	Flotillin-2	FLOT2	10	7332000	8136800	6023100	6388800	5171800	7184100	6189600	7594800	0.937577	0.55567
P48735	Isocitrate dehydrogenase [NADP], mitochondrial	IDH2	23	137170000	154410000	159430000	172590000	136890000	184070000	183160000	183460000	1.1026	0.326875
O75494	Serine/arginine-rich splicing factor 10	SRSF10	3	6424900	7976600	7033800	7895700	6605700	9552700	6206800	5175100	0.938949	0.562566
Q86UE4	Protein LYRIC	MTDH	12	23511000	28802000	25799000	25384000	23366000	16568000	25291000	27755000	0.898392	0.34717
P63173	60S ribosomal protein L38	RPL38	6	43356000	44198000	38760000	42315000	45578000	50276000	52933000	34315000	1.08583	0.512741
P02545	Prelamin-A/C;Lamin-A/C	LMNA	31	43626000	101370000	104970000	66673000	81960000	119560000	86944000	101300000	1.23094	0.294101
Q86VP6	Cullin-associated NEDD8-dissociated protein 1	CAND1	25	78938000	47023000	73478000	66497000	77697000	68510000	81315000	63472000	1.09423	0.448582
Q15043	Zinc transporter ZIP14	SLC39A14	6	108280000	56309000	68421000	73321000	101140000	42126000	60517000	39573000	0.794422	0.323742
Q9BY32	Inosine triphosphate pyrophosphatase	ITPA	5	6876900	6615200	14903000	6393800	8097900	11584000	5883100	7867500	0.961011	0.998737
Q9Y3B3	Transmembrane emp24 domain-containing protein 7	TMED7	2	5272200	4672900	5632100	4928100	4027800	5343200	4395400	8765100	1.09881	0.796348
P61956	Small ubiquitin-related modifier 2	SUMO2	3	41687000	27022000	32523000	45355000	47194000	41503000	40806000	37317000	1.13803	0.295563
Q96JJ7	Protein disulfide-isomerase TMX3	TMX3	3	2949200	3437500	4151000	2949800	3276500	2885600	3000400	3841700	0.964167	0.762809
P35241	Radixin	RDX	22	75626000	71380000	55503000	47084000	76206000	48103000	68289000	76655000	1.07877	0.638936
Q9UJA5	tRNA (adenine(58)-N(1))-methyltransferase non-catalytic subunit TRM6	TRMT6	5	4606900	4444200	3952900	5371300	4809700	4000500	5280900	4719400	1.02368	0.784095
P50995	Annexin A11	ANXA11	15	54633000	60524000	60174000	55016000	60325000	69127000	53064000	67283000	1.08445	0.290207
P61081	NEDD8-conjugating enzyme Ubc12	UBE2M	1	3895100	2437500	1925100	3013200	2380500	2083900	4125100	3056500	1.03328	0.88595
Q13813	Spectrin alpha chain, non-erythrocytic 1	SPTAN1	191	1193300000	1437300000	1209700000	929280000	1525300000	1516800000	1776500000	1577600000	1.34104	0.0204496
O00422	Histone deacetylase complex subunit SAP18	SAP18	4	5226200	4368300	4946300	5689500	4246200	5863500	6393200	7825300	1.20256	0.277982
Q5TDH0	Protein DDI1 homolog 2	DDI2	6	34405000	30264000	26006000	27623000	28975000	28100000	30096000	26493000	0.960828	0.613896
O75691	Small subunit processome component 20 homolog	UTP20	3	1484600	1508000	1610000	1271500	2123600	2346400	1376900	1327800	1.22141	0.309223
Q9NPA0	ER membrane protein complex subunit 7	EMC7	2	6584400	4145600	4206700	5518600	5103500	4986500	10907000	4311600	1.23726	0.527848
P10809	60 kDa heat shock protein, mitochondrial	HSPD1	91	7696600000	6691800000	6572200000	7145900000	7206800000	6558500000	7419100000	7132200000	1.00748	0.857454
Q9NRX4	14 kDa phosphohistidine phosphatase	PHPT1	5	28727000	16948000	18998000	27562000	33823000	19941000	28182000	16192000	1.064	0.831853
Q96S52	GPI transamidase component PIG-S	PIGS	4	8937100	5201100	10804000	7737700	6225400	11131000	9380100	8878400	1.08981	0.634151
Q92597	Protein NDRG1	NDRG1	10	41197000	44351000	39435000	33668000	23121000	44254000	35717000	39718000	0.900152	0.435724
P53602	Diphosphomevalonate decarboxylase	MVD	9	11351000	20702000	21763000	27372000	22642000	19882000	23172000	15799000	1.00378	0.850423
P53384	Cytosolic Fe-S cluster assembly factor NUBP1	NUBP1	3	6924000	6858600	7040900	5912600	6252900	6987800	5153100	7645500	0.973938	0.725797
Q92504	Zinc transporter SLC39A7	SLC39A7	3	9460300	8947100	7390000	9296500	7868600	5721900	8320500	8767900	0.874195	0.247491
P35998	26S protease regulatory subunit 7	PSMC2	22	91788000	69596000	88744000	102580000	92571000	79365000	93617000	82579000	0.987026	0.950725
Q13268	Dehydrogenase/reductase SDR family member 2, mitochondrial	DHRS2	33	1340500000	1017500000	1151700000	1822200000	1630500000	1317200000	1790500000	1250500000	1.12318	0.426317
P22695	Cytochrome b-c1 complex subunit 2, mitochondrial	UQCRC2	12	37306000	45353000	41445000	45341000	39927000	42877000	42682000	55214000	1.06642	0.510738
Q96GC9	Vacuole membrane protein 1	VMP1	5	12555000	9972500	9429800	9468700	11789000	9448900	14813000	11289000	1.14276	0.308179
Q10567	AP-1 complex subunit beta-1	AP1B1	6	22166000	19071000	19722000	23602000	19975000	17748000	22662000	21102000	0.963648	0.62201
Q15031	Probable leucine--tRNA ligase, mitochondrial	LARS2	9	11022000	5985400	6682700	5483100	6765500	8243800	8426000	8039300	1.07889	0.521274
O15127	Secretory carrier-associated membrane protein 2	SCAMP2	3	9159100	5680800	8584900	10230000	9958100	8722600	11979000	7653400	1.13841	0.419255
O43264	Centromere/kinetochore protein zw10 homolog	ZW10	4	2962600	2068400	8002100	2783000	3164800	4696700	3526500	2729500	0.892603	0.971343
Q9BV38	WD repeat-containing protein 18	WDR18	7	7444600	9911300	8709400	6198700	7051600	9490600	6599600	11875000	1.08532	0.699534
Q9UBS4	DnaJ homolog subfamily B member 11	DNAJB11	8	32562000	33122000	18526000	21313000	25769000	21747000	23454000	34290000	0.997508	0.939217
P04114	Apolipoprotein B-100;Apolipoprotein B-48	APOB	29	38624000	58359000	50191000	34354000	30577000	45996000	40459000	59300000	0.971376	0.853418
Q9BTT0	Acidic leucine-rich nuclear phosphoprotein 32 family member E	ANP32E	4	16632000	13756000	14541000	17583000	19156000	16798000	20357000	15492000	1.14863	0.153204
O15091	Mitochondrial ribonuclease P protein 3	KIAA0391	2	3290900	3723200	2939800	2560300	2207400	3649500	3883600	3070400	1.02371	0.94794
P57088	Transmembrane protein 33	TMEM33	1	2516200	2411200	3021000	4765900	3333600	4398500	3427600	2396700	1.06623	0.701235
P02765	Alpha-2-HS-glycoprotein;Alpha-2-HS-glycoprotein chain A;Alpha-2-HS-glycoprotein chain B	AHSG	1	5783400	5837200	7185600	5459700	6307400	3408600	4541700	3664700	0.738584	0.0728291
Q96G03	Phosphoglucomutase-2	PGM2	10	16787000	17956000	19906000	21061000	23680000	24426000	21454000	17671000	1.15217	0.172413
P27695	DNA-(apurinic or apyrimidinic site) lyase;DNA-(apurinic or apyrimidinic site) lyase, mitochondrial	APEX1	10	106020000	110450000	67040000	84171000	113370000	61142000	111080000	84985000	1.00788	0.989911
Q8TCS8	Polyribonucleotide nucleotidyltransferase 1, mitochondrial	PNPT1	14	22357000	27481000	17695000	17709000	24954000	23052000	25637000	26231000	1.17165	0.162541
P26640	Valine--tRNA ligase	VARS	39	189840000	184340000	198380000	165010000	172230000	176490000	151430000	201030000	0.950662	0.475217
Q02318	Sterol 26-hydroxylase, mitochondrial	CYP27A1	4	8831500	7332700	6858000	7307800	6171200	7637700	6715000	5908400	0.87149	0.129912
Q6PGP7	Tetratricopeptide repeat protein 37	TTC37	2	2975500	2761500	3356300	1639400	5108600	2460900	5799800	3409100	1.5633	0.141129
Q96QD8	Sodium-coupled neutral amino acid transporter 2	SLC38A2	4	59154000	53922000	35051000	45204000	54899000	24266000	44257000	22921000	0.756956	0.228933
Q9UNE7	E3 ubiquitin-protein ligase CHIP	STUB1	2	2629500	2658400	1995800	0	3102900	2437800	2610000	1575700	1.00152	0.92271
Q9UKF6	Cleavage and polyadenylation specificity factor subunit 3	CPSF3	8	11877000	13586000	14565000	10305000	17087000	4679500	9010500	11521000	0.840363	0.379542
O75832	26S proteasome non-ATPase regulatory subunit 10	PSMD10	5	13125000	9673400	12010000	12109000	15306000	11256000	19434000	16842000	1.33933	0.0802845
Q9Y4J8;O60941	Dystrobrevin alpha;Dystrobrevin beta	DTNA;DTNB	2	0	0	0	600620	606460	661150	769730	1023900	1.2742	1
Q9NZ01	Very-long-chain enoyl-CoA reductase	TECR	4	15067000	17161000	17311000	23562000	15359000	17274000	17604000	14968000	0.891985	0.358029
Q9HD20	Manganese-transporting ATPase 13A1	ATP13A1	7	3586600	6277900	5442500	5508400	4632300	4981000	6410300	4283000	0.975557	0.918968
Q96EY8	Cob(I)yrinic acid a,c-diamide adenosyltransferase, mitochondrial	MMAB	5	3147000	5155100	4154200	5064700	7144700	6341800	5107900	4620200	1.32496	0.109227
P36915	Guanine nucleotide-binding protein-like 1	GNL1	3	3961400	13491000	2506800	3610800	4499600	5109300	1816500	3256700	0.622915	0.490946
Q9BS26	Endoplasmic reticulum resident protein 44	ERP44	8	14560000	31692000	22609000	21490000	21380000	20385000	24996000	26812000	1.03566	0.713596
Q15746	Myosin light chain kinase, smooth muscle;Myosin light chain kinase, smooth muscle, deglutamylated form	MYLK	2	2035200	2605700	3208800	3545200	2128300	3884400	2872300	2131600	0.966801	0.824229
P29966	Myristoylated alanine-rich C-kinase substrate	MARCKS	6	11365000	9941800	8506200	8142000	11862000	8843200	4596000	12657000	1.00008	0.807154
Q68EM7	Rho GTPase-activating protein 17	ARHGAP17	2	2321800	1672400	2234700	2086900	0	2584700	3549000	2382500	1.36546	0.0720615
Q5RKV6	Exosome complex component MTR3	EXOSC6	4	8535600	7401000	6173400	7592400	7441500	3421400	7390800	4059000	0.751209	0.162081
O75616	GTPase Era, mitochondrial	ERAL1	1	2760600	2530300	2584400	3612800	3038500	0	3653300	2411100	1.0565	0.729023
P55263	Adenosine kinase	ADK	8	12213000	10042000	11074000	11552000	9910600	11220000	14609000	12821000	1.08199	0.477008
P61326;Q96A72	Protein mago nashi homolog;Protein mago nashi homolog 2	MAGOH;MAGOHB	2	10398000	7175000	5832300	8004400	12657000	9599400	12345000	6803200	1.31821	0.202627
P06132	Uroporphyrinogen decarboxylase	UROD	7	24227000	32160000	30376000	29824000	33308000	38991000	39531000	35352000	1.26242	0.0189671
P30533	Alpha-2-macroglobulin receptor-associated protein	LRPAP1	14	24164000	28683000	12206000	10253000	17127000	10650000	16133000	23143000	0.890407	0.846106
Q93009	Ubiquitin carboxyl-terminal hydrolase 7	USP7	27	125790000	82055000	96568000	98140000	114480000	98509000	115020000	89104000	1.03617	0.712139
Q14690	Protein RRP5 homolog	PDCD11	16	21223000	18358000	20077000	20292000	21312000	20297000	23232000	25639000	1.13171	0.0886451
Q9Y266	Nuclear migration protein nudC	NUDC	24	232300000	214230000	202170000	192470000	168470000	164880000	176700000	237320000	0.888489	0.224647
Q96TA1	Niban-like protein 1	FAM129B	4	1556100	4818300	3907000	3235400	2816200	3546800	3624600	2796600	0.945801	0.950616
Q9UPN3	Microtubule-actin cross-linking factor 1, isoforms 1/2/3/5	MACF1	6	26598000	15449000	22738000	20287000	27427000	46268000	19634000	28244000	1.42906	0.17023
Q9BZJ0	Crooked neck-like protein 1	CRNKL1	4	3840100	3260200	2869200	0	3706800	3746300	3239800	2340800	0.980518	0.849396
P68400;Q8NEV1	Casein kinase II subunit alpha;Casein kinase II subunit alpha 3	CSNK2A1;CSNK2A3	12	60836000	52245000	47852000	57320000	44154000	53877000	58790000	53328000	0.962869	0.643322
Q9Y4P3	Transducin beta-like protein 2	TBL2	10	13127000	18887000	14433000	13634000	11548000	12256000	15991000	19951000	0.994424	0.902036
Q9UBU9	Nuclear RNA export factor 1	NXF1	7	8895600	9206100	7405300	7006900	8036400	8143600	8441600	10913000	1.0929	0.408846
Q9BVP2	Guanine nucleotide-binding protein-like 3	GNL3	7	11106000	21958000	20382000	17113000	18536000	22279000	16297000	20028000	1.09327	0.514617
Q7Z2T5	TRMT1-like protein	TRMT1L	2	15481000	0	0	15411000	17352000	0	11969000	25479000	1.18261	0.697302
P11168	Solute carrier family 2, facilitated glucose transporter member 2	SLC2A2	1	1776000	1156300	0	1432100	0	0	0	0	1	1
P14866	Heterogeneous nuclear ribonucleoprotein L	HNRNPL	37	473320000	469920000	456050000	424310000	471400000	447620000	506210000	439810000	1.02272	0.60603
P78316	Nucleolar protein 14	NOP14	3	2293900	2481100	1767900	2191700	1448600	3409600	2874300	2512200	1.17289	0.567763
Q8WVV9	Heterogeneous nuclear ribonucleoprotein L-like	HNRNPLL	7	7065100	6657800	7146200	6759100	6512500	5812400	7267000	7953400	0.996999	0.897125
Q9Y6D9	Mitotic spindle assembly checkpoint protein MAD1	MAD1L1	6	2564200	2307600	1447400	1911500	2083900	1579400	2227400	3097400	1.09202	0.676699
P07814	Bifunctional glutamate/proline--tRNA ligase;Glutamate--tRNA ligase;Proline--tRNA ligase	EPRS	66	351680000	314650000	336200000	291080000	312460000	306840000	302240000	343640000	0.978023	0.691259
Q9HCM4;Q9H329	Band 4.1-like protein 5;Band 4.1-like protein 4B	EPB41L5;EPB41L4B	2	0	445300	540750	1003000	0	493060	918730	1101300	1.26346	0.522213
Q9UBE0	SUMO-activating enzyme subunit 1;SUMO-activating enzyme subunit 1, N-terminally processed	SAE1	10	25800000	23887000	20590000	23900000	28579000	28792000	24071000	31526000	1.19953	0.0493236
Q92947	Glutaryl-CoA dehydrogenase, mitochondrial	GCDH	6	5315200	7715200	5118000	9994200	5483500	9808200	11665000	6138000	1.17596	0.552964
O75607	Nucleoplasmin-3	NPM3	1	9127100	7424800	7664500	8338100	7104000	6857900	6996400	4959000	0.79612	0.0526272
Q13523	Serine/threonine-protein kinase PRP4 homolog	PRPF4B	3	4777400	0	3576800	3596000	3839300	5606600	2953500	4812200	1.08021	0.764312
Q14152	Eukaryotic translation initiation factor 3 subunit A	EIF3A	65	255060000	218820000	232410000	218130000	225750000	216140000	197100000	233950000	0.944311	0.313124
Q86X55	Histone-arginine methyltransferase CARM1	CARM1	6	32737000	25800000	34334000	28334000	29850000	33476000	30244000	30579000	1.02429	0.691979
O75439	Mitochondrial-processing peptidase subunit beta	PMPCB	13	31622000	40277000	30919000	35407000	26109000	39664000	34194000	38801000	1.00393	0.975259
Q9Y646	Carboxypeptidase Q	CPQ	4	5021100	7047200	4634300	7549300	4252500	4255900	4990400	4580200	0.745467	0.0744758
P00167	Cytochrome b5	CYB5A	6	108500000	52411000	63342000	97865000	143270000	58708000	112910000	52291000	1.13989	0.785439
Q8TCC3	39S ribosomal protein L30, mitochondrial	MRPL30	2	0	895000	1044800	1340400	0	1237200	0	1512300	1.25732	0.254572
Q9Y262	Eukaryotic translation initiation factor 3 subunit L	EIF3L	19	65279000	55966000	69328000	57915000	54705000	52820000	60711000	57925000	0.910149	0.170126
Q8NI27	THO complex subunit 2	THOC2	6	3831200	5940600	2844600	2544200	2332400	1272700	2596600	0	0.545423	0.0962347
P51812	Ribosomal protein S6 kinase alpha-3	RPS6KA3	28	152410000	129170000	138490000	131600000	132420000	144490000	132830000	131060000	0.980296	0.683365
P07305	Histone H1.0;Histone H1.0, N-terminally processed	H1F0	4	7010600	7653400	5386100	5776400	8891700	6324700	6148800	10301000	1.22611	0.257459
P22234	Multifunctional protein ADE2;Phosphoribosylaminoimidazole-succinocarboxamide synthase;Phosphoribosylaminoimidazole carboxylase	PAICS	15	97921000	104690000	47968000	47654000	77363000	62813000	66287000	77843000	0.953302	0.942169
Q96ER3	Protein SAAL1	SAAL1	2	1191600	1345700	1587600	1276000	1447500	821910	869320	814240	0.731909	0.0671785
Q08378	Golgin subfamily A member 3	GOLGA3	3	694290	556070	553910	784130	655210	493130	457320	1051900	1.02672	0.930034
P22061	Protein-L-isoaspartate(D-aspartate) O-methyltransferase	PCMT1	11	181550000	126410000	140530000	217290000	220680000	165390000	207050000	125640000	1.07958	0.682928
P19404	NADH dehydrogenase [ubiquinone] flavoprotein 2, mitochondrial	NDUFV2	2	6559800	4549900	9152000	6518800	9152300	10942000	8620700	7754200	1.36178	0.0838284
Q9NTZ6	RNA-binding protein 12	RBM12	6	5113600	4264700	3374200	5020600	4924000	2713200	4281700	4910900	0.946925	0.702246
Q8WUA2	Peptidyl-prolyl cis-trans isomerase-like 4	PPIL4	6	18746000	16474000	11418000	17821000	17511000	12324000	17886000	7041900	0.849577	0.42507
Q12905	Interleukin enhancer-binding factor 2	ILF2	15	134550000	189030000	182390000	186720000	150720000	230260000	152410000	213390000	1.07809	0.647319
Q6IBS0	Twinfilin-2	TWF2	9	19390000	20784000	19882000	31184000	15050000	27773000	26744000	21155000	0.994323	0.941513
Q99798	Aconitate hydratase, mitochondrial	ACO2	29	143000000	115820000	103110000	100440000	144660000	115230000	116460000	133060000	1.10174	0.333614
Q8WV74	Nucleoside diphosphate-linked moiety X motif 8, mitochondrial	NUDT8	1	1716000	1925300	1814800	2166200	1909800	2450800	2114000	1406200	1.03391	0.897144
Q9NYF8	Bcl-2-associated transcription factor 1	BCLAF1	22	59435000	59575000	48861000	52847000	55609000	43323000	42660000	63736000	0.930273	0.474634
P52306	Rap1 GTPase-GDP dissociation stimulator 1	RAP1GDS1	3	2482400	2366900	3287900	2314300	2015900	1967700	2009300	2139400	0.778099	0.0276551
Q92600	Cell differentiation protein RCD1 homolog	RQCD1	3	0	3952700	1829500	2705700	1889800	0	2898000	0	0.84611	0.696555
P63220	40S ribosomal protein S21	RPS21	6	16420000	12500000	10327000	18792000	15043000	15066000	12262000	10396000	0.909165	0.637111
Q9UHK6	Alpha-methylacyl-CoA racemase	AMACR	2	0	0	0	0	0	1962300	0	1091000	1	1
P29992	Guanine nucleotide-binding protein subunit alpha-11	GNA11	2	1717000	3213600	4412500	2737100	6279600	5343500	6636100	3859900	1.83102	0.0326875
Q06830	Peroxiredoxin-1	PRDX1	21	1091100000	941020000	992930000	1286700000	1328900000	1305200000	1302100000	1152000000	1.18008	0.0653543
O14653	Golgi SNAP receptor complex member 2	GOSR2	1	0	3227800	2386700	3706800	2353500	0	4460300	0	1.09649	0.854314
Q53GS9	U4/U6.U5 tri-snRNP-associated protein 2	USP39	5	8976200	11559000	6485800	9997500	7188500	10001000	11004000	10593000	1.04776	0.737938
Q8N4P3	Guanosine-3,5-bis(diphosphate) 3-pyrophosphohydrolase MESH1	HDDC3	1	1114900	707350	786490	1120800	776670	728140	885480	1321000	0.995107	0.94691
Q9BXJ9	N-alpha-acetyltransferase 15, NatA auxiliary subunit	NAA15	8	6934000	3680100	7330800	2209500	4362900	14170000	10649000	6040200	1.74761	0.197045
P15531	Nucleoside diphosphate kinase A	NME1	4	16497000	17724000	26832000	31097000	33987000	37037000	26172000	12455000	1.18992	0.671979
Q96K17	Transcription factor BTF3 homolog 4	BTF3L4	5	40354000	37797000	29966000	26555000	34891000	31849000	27804000	27145000	0.903595	0.450228
P51659	Peroxisomal multifunctional enzyme type 2;(3R)-hydroxyacyl-CoA dehydrogenase;Enoyl-CoA hydratase 2	HSD17B4	29	180280000	185460000	143500000	152780000	158570000	183840000	174760000	173900000	1.04388	0.521998
P17612	cAMP-dependent protein kinase catalytic subunit alpha	PRKACA	4	1596400	1352900	1116600	1645800	1596400	1320600	1286000	1425600	0.985451	0.949987
Q9NUP9;O14910	Protein lin-7 homolog C;Protein lin-7 homolog A	LIN7C;LIN7A	1	1713000	1245900	982710	1148000	2197200	1457400	1963300	1494000	1.39734	0.0703794
Q02218	2-oxoglutarate dehydrogenase, mitochondrial	OGDH	14	15326000	13400000	14225000	15498000	13311000	14372000	15010000	17821000	1.03533	0.679492
P08183	Multidrug resistance protein 1	ABCB1	8	8676000	9783500	11556000	7529500	12930000	12934000	13834000	12682000	1.39513	0.00992572
Q52LJ0;Q8NCA5	Protein FAM98B;Protein FAM98A	FAM98B;FAM98A	4	8530400	6296300	4283300	6680300	6233500	3984500	6274400	4524900	0.81493	0.328238
Q92538	Golgi-specific brefeldin A-resistance guanine nucleotide exchange factor 1	GBF1	8	8267300	7201700	5664200	10401000	10567000	9015900	10188000	7764600	1.19031	0.235427
O14562	Ubiquitin domain-containing protein UBFD1	UBFD1	10	16069000	13880000	4951200	9991900	16567000	11042000	12556000	14686000	1.22184	0.351643
P50747	Biotin--protein ligase;Biotin--[methylmalonyl-CoA-carboxytransferase] ligase;Biotin--[propionyl-CoA-carboxylase [ATP-hydrolyzing]] ligase;Biotin--[methylcrotonoyl-CoA-carboxylase] ligase;Biotin--[acetyl-CoA-carboxylase] ligase	HLCS	2	7434600	7524900	5161800	5232600	8338900	5217200	6516400	5522900	1.00953	0.954269
Q15363	Transmembrane emp24 domain-containing protein 2	TMED2	2	2516200	0	2772200	3479100	2542300	2287500	2919500	0	0.883867	0.374368
Q96LJ7	Dehydrogenase/reductase SDR family member 1	DHRS1	6	10379000	14486000	7816800	11719000	9720400	11760000	13709000	11001000	1.04031	0.716357
O75489	NADH dehydrogenase [ubiquinone] iron-sulfur protein 3, mitochondrial	NDUFS3	5	6080600	3436200	6332000	5232500	7659700	11063000	3761600	8535700	1.47145	0.251557
Q02790	Peptidyl-prolyl cis-trans isomerase FKBP4;Peptidyl-prolyl cis-trans isomerase FKBP4, N-terminally processed	FKBP4	18	96726000	87554000	83828000	81836000	80839000	59166000	66949000	84572000	0.833065	0.0809375
O94874	E3 UFM1-protein ligase 1	UFL1	6	5477000	4665100	5192800	7261000	3748700	6103900	6767300	8711400	1.12106	0.689051
E9PAV3;Q13765	Nascent polypeptide-associated complex subunit alpha, muscle-specific form;Nascent polypeptide-associated complex subunit alpha	NACA	10	48416000	63190000	43430000	58646000	51841000	69559000	46908000	69791000	1.11427	0.465771
Q9UBQ5	Eukaryotic translation initiation factor 3 subunit K	EIF3K	6	21647000	17177000	15016000	18472000	24090000	16882000	23616000	20775000	1.18048	0.190372
Q16543	Hsp90 co-chaperone Cdc37;Hsp90 co-chaperone Cdc37, N-terminally processed	CDC37	19	138810000	136800000	102630000	114770000	115450000	97757000	122550000	123730000	0.932003	0.48908
O96017	Serine/threonine-protein kinase Chk2	CHEK2	2	4189000	6077000	4613600	3583800	3605600	4009300	4498800	2783100	0.806829	0.211955
Q15020	Squamous cell carcinoma antigen recognized by T-cells 3	SART3	20	42575000	35657000	36530000	37331000	37218000	35645000	31704000	40676000	0.954962	0.492242
Q9ULT8	E3 ubiquitin-protein ligase HECTD1	HECTD1	7	8246900	7725800	7276600	10164000	5810800	5298000	10464000	5415900	0.807723	0.211045
P07237	Protein disulfide-isomerase	P4HB	73	5425000000	4534500000	4923400000	4722900000	3952900000	3879700000	3806300000	3385000000	0.766299	0.00218633
P46734	Dual specificity mitogen-activated protein kinase kinase 3	MAP2K3	4	7248300	9280700	9855600	12459000	15292000	8865400	10269000	7563900	1.08101	0.756995
Q9Y4W2	Ribosomal biogenesis protein LAS1L	LAS1L	5	8117300	3209300	5209000	3427200	2002400	2381300	4411300	8300100	0.856348	0.551233
Q12788	Transducin beta-like protein 3	TBL3	5	4476700	2234500	3321800	4066200	3911600	3591000	3383700	3312200	1.00704	0.817399
P19105;O14950	Myosin regulatory light chain 12A;Myosin regulatory light chain 12B	MYL12A;MYL12B	1	4756300	3708000	3750900	3899200	5962700	6600400	5237400	5332800	1.43557	0.00378278
Q16891	MICOS complex subunit MIC60	IMMT	4	4790300	3811700	3271100	3065700	3294900	3689300	3718200	6461200	1.14893	0.542913
P16615	Sarcoplasmic/endoplasmic reticulum calcium ATPase 2	ATP2A2	24	107000000	116820000	116750000	97480000	87163000	100340000	87475000	110140000	0.879164	0.116252
Q9Y320	Thioredoxin-related transmembrane protein 2	TMX2	1	10810000	9135300	6469800	8988800	7928400	4779800	9633600	5752300	0.793531	0.234848
P08238	Heat shock protein HSP 90-beta	HSP90AB1	64	3894600000	2988500000	2922800000	2858700000	3441200000	2649000000	2760600000	2839000000	0.92303	0.437421
Q8WXX5	DnaJ homolog subfamily C member 9	DNAJC9	5	3968600	4988800	4509800	3639800	4219900	2527900	5612900	4149100	0.96509	0.721378
Q15404	Ras suppressor protein 1	RSU1	5	3222600	4196600	3150400	3227800	3096600	3872200	3180200	3156100	0.964319	0.711056
Q13838	Spliceosome RNA helicase DDX39B	DDX39B	15	73158000	76681000	75470000	82968000	70167000	78124000	76615000	83013000	0.998839	0.967313
P20340;Q9NRW1	Ras-related protein Rab-6A;Ras-related protein Rab-6B	RAB6A;RAB6B	6	16378000	17405000	22871000	21320000	21475000	25064000	22370000	25932000	1.21632	0.0691849
P35080	Profilin-2	PFN2	2	1006700	0	0	9473700	0	0	1765500	0	0.336915	1
P47756	F-actin-capping protein subunit beta	CAPZB	13	101550000	125090000	102940000	92089000	98364000	120610000	121360000	126930000	1.10813	0.269488
O15145	Actin-related protein 2/3 complex subunit 3	ARPC3	7	67306000	62512000	61863000	68003000	80062000	68443000	97074000	72293000	1.22407	0.053125
P67936	Tropomyosin alpha-4 chain	TPM4	15	69241000	122310000	119930000	94439000	92338000	113900000	84168000	131730000	1.03995	0.779792
P29692	Elongation factor 1-delta	EEF1D	14	128310000	175880000	143610000	126060000	117980000	171280000	128210000	160420000	1.00702	0.971991
P78371	T-complex protein 1 subunit beta	CCT2	42	439870000	451080000	507740000	457200000	420380000	433130000	476490000	476970000	0.973641	0.576617
Q92820	Gamma-glutamyl hydrolase	GGH	9	19493000	42470000	42371000	40463000	15469000	52760000	27401000	25071000	0.833588	0.490596
P14625	Endoplasmin	HSP90B1	81	4405700000	3041600000	3353000000	3192800000	3277100000	2497400000	2830200000	2875400000	0.820411	0.102935
Q9NRX5	Serine incorporator 1	SERINC1	2	2434000	1100800	0	1284300	1171100	0	1368500	0	0.79048	0.619313
Q9BQA1	Methylosome protein 50	WDR77	8	18473000	21855000	20135000	25666000	17432000	20198000	21356000	22801000	0.949587	0.60677
Q15019	Septin-2	43345	10	27345000	32009000	68854000	35672000	25844000	47154000	38721000	34917000	0.894777	0.789856
Q9Y697	Cysteine desulfurase, mitochondrial	NFS1	9	14030000	12829000	11792000	16286000	15430000	16895000	13552000	9912400	1.01552	0.981606
P02647	Apolipoprotein A-I;Proapolipoprotein A-I;Truncated apolipoprotein A-I	APOA1	9	9147300	7038900	12200000	11844000	7016100	9379700	8846000	13051000	0.951842	0.78947
Q7Z4Q2	HEAT repeat-containing protein 3	HEATR3	1	1123600	2580800	1475500	1973000	2544400	903370	1998000	1737600	1.00426	0.96227
O00442	RNA 3-terminal phosphate cyclase	RTCA	3	1322600	836950	1419500	1067900	842060	949280	0	1755200	1.0176	0.947056
Q5JTV8	Torsin-1A-interacting protein 1	TOR1AIP1	6	11535000	13783000	11115000	12461000	14110000	13790000	15366000	12108000	1.13253	0.119524
Q99956	Dual specificity protein phosphatase 9	DUSP9	10	60476000	68778000	53035000	64815000	41277000	59987000	58867000	71459000	0.937217	0.558599
Q16539	Mitogen-activated protein kinase 14	MAPK14	5	9796900	3971300	6546400	7191100	6657400	10577000	12625000	8269100	1.3862	0.188029
Q96AT9	Ribulose-phosphate 3-epimerase	RPE	5	5740500	11000000	6475300	10130000	8257800	7612900	7317100	7051900	0.906852	0.723453
P49327	Fatty acid synthase;[Acyl-carrier-protein] S-acetyltransferase;[Acyl-carrier-protein] S-malonyltransferase;3-oxoacyl-[acyl-carrier-protein] synthase;3-oxoacyl-[acyl-carrier-protein] reductase;3-hydroxyacyl-[acyl-carrier-protein] dehydratase;Enoyl-[acyl-carrier-protein] reductase;Oleoyl-[acyl-carrier-protein] hydrolase	FASN	151	3723500000	3620600000	3838500000	3482100000	3582500000	3469100000	3439700000	3380300000	0.945918	0.0615246
P14174	Macrophage migration inhibitory factor	MIF	5	137150000	85666000	161590000	141370000	201150000	192970000	214580000	72120000	1.29489	0.518819
Q9UMX0	Ubiquilin-1	UBQLN1	5	9119300	6099100	8511500	9082100	7522300	15274000	5456500	6830900	1.06923	0.996861
Q99523	Sortilin	SORT1	9	20165000	8681700	15229000	11250000	13297000	11081000	10090000	8807800	0.782201	0.345122
Q8NBS9	Thioredoxin domain-containing protein 5	TXNDC5	34	699910000	715110000	678640000	608600000	484180000	520220000	543610000	568870000	0.783374	0.00265872
P82912	28S ribosomal protein S11, mitochondrial	MRPS11	3	4553100	4328800	3982400	3864300	4574200	4508000	2903900	4999600	1.01537	0.980413
Q9HCE1	Putative helicase MOV-10	MOV10	19	42708000	27510000	35962000	33817000	40948000	33136000	39078000	33029000	1.04424	0.649735
P13798	Acylamino-acid-releasing enzyme	APEH	13	73872000	65543000	57714000	64169000	73669000	54897000	77877000	66538000	1.04471	0.686854
P09001	39S ribosomal protein L3, mitochondrial	MRPL3	4	12098000	10349000	7155900	11309000	9488500	7272700	11919000	10484000	0.957281	0.80606
P21964	Catechol O-methyltransferase	COMT	11	49567000	56239000	67292000	73762000	77736000	91584000	71389000	47449000	1.16729	0.434516
Q8IWB7	WD repeat and FYVE domain-containing protein 1	WDFY1	1	1287300	0	1512500	1195900	0	1757700	2009200	2161900	1.4838	0.012664
Q8TB22	Spermatogenesis-associated protein 20	SPATA20	4	2882800	2803700	1638100	2255200	2145300	1977600	2207100	2357300	0.906835	0.597653
P60842	Eukaryotic initiation factor 4A-I	EIF4A1	13	121790000	158190000	160040000	147700000	113110000	176540000	122150000	190780000	1.02528	0.971533
P13284	Gamma-interferon-inducible lysosomal thiol reductase	IFI30	1	3564300	2835900	3040300	3647700	3490400	3143300	3901400	4908800	1.17999	0.215328
P47897	Glutamine--tRNA ligase	QARS	41	165870000	131540000	143390000	135910000	140290000	140190000	138220000	130840000	0.952888	0.438757
P42892	Endothelin-converting enzyme 1	ECE1	2	925980	697650	744900	864450	708870	0	634390	651120	0.822515	0.0686216
Q15154	Pericentriolar material 1 protein	PCM1	7	4793400	7062100	6105500	6485500	6294500	5434500	5107300	5410100	0.910003	0.39046
Q9H8H0	Nucleolar protein 11	NOL11	2	1885600	2416600	1680900	2081900	1841600	3580100	996820	2535700	1.11026	0.970141
Q12965	Unconventional myosin-Ie	MYO1E	2	850280	0	787240	628630	849920	866570	0	895950	1.15281	0.178051
P17301	Integrin alpha-2	ITGA2	12	13689000	12681000	28082000	10446000	30666000	14236000	13594000	15140000	1.13464	0.640729
P00338	L-lactate dehydrogenase A chain	LDHA	34	1000500000	1239800000	1113800000	1126100000	951910000	1147300000	1076100000	1057900000	0.944871	0.375058
Q07955	Serine/arginine-rich splicing factor 1	SRSF1	18	131430000	131080000	134050000	142470000	131050000	145560000	125350000	154200000	1.03178	0.598601
O76031	ATP-dependent Clp protease ATP-binding subunit clpX-like, mitochondrial	CLPX	11	18073000	14829000	11556000	14176000	18095000	11956000	10472000	12404000	0.902667	0.482301
P01034	Cystatin-C	CST3	2	3921000	3964200	3613000	3635300	3502800	3371900	2428400	3632200	0.854746	0.129844
Q9P016	Thymocyte nuclear protein 1	THYN1	4	1867800	2464900	1956400	1930900	2433900	2358400	3727100	3491100	1.46113	0.0355507
Q9Y676	28S ribosomal protein S18b, mitochondrial	MRPS18B	3	5838900	5223400	3537100	4178500	6571800	4574000	3073100	4918500	1.01914	0.99214
P55072	Transitional endoplasmic reticulum ATPase	VCP	74	1599900000	1234600000	1327300000	1366400000	1805300000	1421100000	1533400000	1266200000	1.09005	0.406251
Q9Y291	28S ribosomal protein S33, mitochondrial	MRPS33	2	3289300	2678500	2581400	3116600	2677400	4569900	4485100	2563200	1.22543	0.348872
Q9NQX3	Gephyrin;Molybdopterin adenylyltransferase;Molybdopterin molybdenumtransferase	GPHN	4	10451000	10845000	9542400	11147000	9116600	7140800	13404000	9108200	0.923407	0.468077
Q96CS3	FAS-associated factor 2	FAF2	5	2560100	3780900	3347700	3373800	3780600	2470900	1995600	2909600	0.854101	0.310247
Q5TFE4	5-nucleotidase domain-containing protein 1	NT5DC1	5	6166800	6309600	5025700	7097400	6437800	8530700	10136000	5440000	1.24167	0.259882
Q8WUD4	Coiled-coil domain-containing protein 12	CCDC12	2	5360400	4926200	4356500	4891200	5760100	0	0	7141400	1.32091	1
O60828	Polyglutamine-binding protein 1	PQBP1	2	3901400	3926200	3234400	4961400	5150400	3018000	5203900	4056300	1.0877	0.658354
P61247	40S ribosomal protein S3a	RPS3A	36	365450000	410870000	384640000	415060000	378520000	417420000	396340000	490640000	1.06783	0.369192
Q6YP21	Kynurenine--oxoglutarate transaminase 3	CCBL2	2	3363200	3339200	3778000	3579800	3025600	4114200	4609300	3169400	1.06104	0.684873
Q99747	Gamma-soluble NSF attachment protein	NAPG	3	2440100	2844200	2259400	2463900	0	2262400	1870400	1870900	0.799885	0.0345386
Q6UN15	Pre-mRNA 3-end-processing factor FIP1	FIP1L1	2	5204000	6247400	4959700	4692500	5913200	0	6710500	6208900	1.18985	0.0751039
O75718	Cartilage-associated protein	CRTAP	3	2320300	5603400	3366600	1821100	1769700	5593900	1627000	3651000	0.964169	0.849694
Q9NSD9	Phenylalanine--tRNA ligase beta subunit	FARSB	13	48831000	46573000	45928000	43251000	38641000	47473000	43366000	36330000	0.898295	0.134817
Q13418	Integrin-linked protein kinase	ILK	5	4891700	6168000	8072000	6014600	4103200	8309300	3917100	5258400	0.858496	0.394709
Q9P287	BRCA2 and CDKN1A-interacting protein	BCCIP	10	18106000	22838000	24433000	40415000	25489000	34278000	34328000	33627000	1.20729	0.265355
P20042	Eukaryotic translation initiation factor 2 subunit 2	EIF2S2	4	8829600	5746400	4740600	8846100	8154100	6237000	8209900	8146500	1.09178	0.518247
P19388	DNA-directed RNA polymerases I, II, and III subunit RPABC1	POLR2E	1	1213600	1672000	1680400	2044800	2069400	2070000	2028800	1993600	1.23462	0.080497
P60981	Destrin	DSTN	7	14815000	16056000	17066000	22685000	18923000	25908000	24533000	21082000	1.28071	0.0738741
P35606	Coatomer subunit beta	COPB2	33	151710000	96451000	126690000	111620000	132070000	98496000	129000000	117070000	0.979783	0.915264
A6NFT4	Coiled-coil domain-containing protein 42B	CCDC42B	1	17916000	11715000	0	13059000	15327000	9085500	0	11620000	0.84405	0.424253
O95400	CD2 antigen cytoplasmic tail-binding protein 2	CD2BP2	3	3783300	4230100	0	3687300	3787900	0	2522100	3695200	0.855094	0.283074
Q13724	Mannosyl-oligosaccharide glucosidase	MOGS	20	122240000	106660000	125280000	116600000	124050000	123690000	104330000	99740000	0.959705	0.534778
Q9HD45	Transmembrane 9 superfamily member 3	TM9SF3	4	9767500	9210200	10990000	10347000	8934500	10381000	10302000	11145000	1.01111	0.872287
Q9Y3E0	Vesicle transport protein GOT1B	GOLT1B	3	15432000	10799000	11854000	12029000	10845000	12069000	18397000	14200000	1.10769	0.534238
Q9NY12	H/ACA ribonucleoprotein complex subunit 1	GAR1	2	929980	1616800	5055100	3620500	4881600	3099200	3757800	2172400	1.23958	0.406087
P62847	40S ribosomal protein S24	RPS24	5	21726000	39105000	26458000	39838000	41823000	40715000	59477000	35342000	1.39512	0.111814
Q9Y5S9	RNA-binding protein 8A	RBM8A	3	19039000	9530800	9394600	15221000	17651000	9330400	13609000	9034800	0.933061	0.803053
O00233	26S proteasome non-ATPase regulatory subunit 9	PSMD9	6	12025000	10183000	6867900	9672100	9947800	9076000	8574400	11649000	1.01288	0.85509
P48509	CD151 antigen	CD151	1	5367200	0	0	5210200	4710900	0	6043300	4044200	0.932706	0.620285
A3KMH1	von Willebrand factor A domain-containing protein 8	VWA8	7	4491300	9058100	7459000	9838300	11099000	6814800	4329800	8238300	0.988174	0.926838
P53992	Protein transport protein Sec24C	SEC24C	19	53718000	39094000	37442000	44728000	55129000	40577000	43516000	43018000	1.04148	0.694124
O95373	Importin-7	IPO7	16	50072000	27260000	47193000	37812000	60508000	41542000	58072000	46262000	1.27133	0.172355
Q9BY42	Protein RTF2 homolog	RTFDC1	2	1633400	2876200	1402100	1710300	1964100	1483500	1658900	2432600	0.989124	0.956881
P35754	Glutaredoxin-1	GLRX	3	17196000	6662500	7234600	8447900	12403000	13670000	13562000	9988100	1.25498	0.240703
Q12765	Secernin-1	SCRN1	10	42929000	42817000	42264000	41709000	56525000	46516000	44912000	39881000	1.10674	0.245836
P11216	Glycogen phosphorylase, brain form	PYGB	21	75102000	62550000	79389000	56365000	89816000	83283000	66179000	82661000	1.17751	0.158044
Q9ULV4	Coronin-1C	CORO1C	15	51698000	41877000	31016000	31336000	44189000	41112000	39998000	53732000	1.14817	0.312521
Q92900	Regulator of nonsense transcripts 1	UPF1	22	58265000	43241000	55033000	45959000	55356000	46292000	50865000	49430000	0.997259	0.973728
P48507	Glutamate--cysteine ligase regulatory subunit	GCLM	3	2024800	3872900	2318000	2537900	2446300	0	0	3573100	1.11951	0.626799
P51003	Poly(A) polymerase alpha	PAPOLA	4	4755700	5160000	4358900	4429700	4213000	3668900	4622000	4551200	0.911828	0.199791
P22626	Heterogeneous nuclear ribonucleoproteins A2/B1	HNRNPA2B1	33	1144300000	1445500000	1279200000	1292000000	1258200000	1249700000	1321300000	1298900000	0.993625	0.949984
P20645	Cation-dependent mannose-6-phosphate receptor	M6PR	4	16319000	10014000	14601000	17485000	13425000	12155000	8745000	10898000	0.774115	0.161586
P19022	Cadherin-2	CDH2	6	23900000	26697000	28503000	29256000	23081000	22960000	25870000	25908000	0.902756	0.123465
Q4VC31	Coiled-coil domain-containing protein 58	CCDC58	3	10494000	8579200	8179900	15899000	14313000	14347000	19797000	13526000	1.43638	0.0684893
Q01650	Large neutral amino acids transporter small subunit 1	SLC7A5	3	34044000	30380000	27063000	26990000	35802000	19835000	23763000	28816000	0.913392	0.456622
O96005	Cleft lip and palate transmembrane protein 1	CLPTM1	7	5071800	5444000	4703000	4442200	6151300	4628200	5812200	6087300	1.1535	0.1324
Q8WUD1	Ras-related protein Rab-2B	RAB2B	2	0	0	3611200	5622600	5501900	0	6420600	5847700	1.28298	0.218421
P34932	Heat shock 70 kDa protein 4	HSPA4	62	510450000	340650000	459480000	380020000	455930000	373530000	449970000	404230000	0.995895	0.962677
P21333	Filamin-A	FLNA	138	591520000	1650100000	1280400000	637740000	708110000	1864100000	1211600000	2229800000	1.44566	0.338859
P02753	Retinol-binding protein 4;Plasma retinol-binding protein(1-182);Plasma retinol-binding protein(1-181);Plasma retinol-binding protein(1-179);Plasma retinol-binding protein(1-176)	RBP4	4	3362800	2287200	2931300	3077300	2947000	1785800	2878900	1983200	0.822989	0.218697
Q9H9A5	CCR4-NOT transcription complex subunit 10	CNOT10	2	1175600	863360	682300	517420	1099600	1059500	968510	709880	1.18489	0.35494
Q13451	Peptidyl-prolyl cis-trans isomerase FKBP5;Peptidyl-prolyl cis-trans isomerase FKBP5, N-terminally processed	FKBP5	8	9368800	14288000	10187000	6181400	6146700	8522700	9056400	9370200	0.826879	0.448974
P52888	Thimet oligopeptidase	THOP1	19	41368000	30491000	30614000	28512000	34394000	27588000	30665000	30412000	0.939489	0.584616
Q13185	Chromobox protein homolog 3	CBX3	14	85941000	65827000	64047000	81389000	80347000	57780000	84843000	59288000	0.949711	0.656022
O15160	DNA-directed RNA polymerases I and III subunit RPAC1	POLR1C	4	4891400	7094300	6048200	4413200	5246100	7758300	7300700	6856100	1.21001	0.20037
Q9H074	Polyadenylate-binding protein-interacting protein 1	PAIP1	3	2217100	2139500	2326700	2358200	1831500	1998100	1936500	2658500	0.93177	0.384775
Q15041	ADP-ribosylation factor-like protein 6-interacting protein 1	ARL6IP1	3	8071400	9566700	9160000	12056000	10264000	10681000	18094000	16127000	1.41982	0.0937622
Q03518	Antigen peptide transporter 1	TAP1	2	11794000	7433800	3533600	3821000	5855300	4098400	5934400	6310300	0.835079	0.827527
Q9Y5P6	Mannose-1-phosphate guanyltransferase beta	GMPPB	1	5089600	7109800	9203600	7913000	3992600	7536400	6767800	5481900	0.811117	0.297103
Q9BTT6	Leucine-rich repeat-containing protein 1	LRRC1	4	4199600	16438000	6423300	5494500	6481900	4953600	5037700	3214900	0.604757	0.28689
P31150	Rab GDP dissociation inhibitor alpha	GDI1	5	13296000	11482000	14535000	9278600	13085000	13861000	15854000	11929000	1.12631	0.308508
Q92817	Envoplakin	EVPL	3	18874000	4446300	2176600	16204000	9515300	7227800	13741000	0	0.97469	0.671771
Q9NQG5	Regulation of nuclear pre-mRNA domain-containing protein 1B	RPRD1B	10	40042000	40988000	30661000	34990000	36156000	26293000	31938000	30703000	0.852803	0.141564
Q16851	UTP--glucose-1-phosphate uridylyltransferase	UGP2	17	65663000	69547000	69818000	61428000	54879000	74283000	61292000	75707000	0.998893	0.920256
Q9NVI7	ATPase family AAA domain-containing protein 3A	ATAD3A	6	9101300	14408000	12250000	12348000	9957400	11451000	11645000	3105600	0.751632	0.281761
O00299	Chloride intracellular channel protein 1	CLIC1	24	512810000	612200000	600710000	575450000	585480000	685050000	680860000	744090000	1.17135	0.0492815
O60664	Perilipin-3	PLIN3	26	237330000	241960000	231240000	201350000	228400000	238480000	189340000	235170000	0.97753	0.731971
P07947	Tyrosine-protein kinase Yes	YES1	2	3489700	2504500	2208800	2730800	3633800	2219700	2416300	3270800	1.0555	0.766113
P00558	Phosphoglycerate kinase 1	PGK1	50	1539600000	1896900000	1542700000	1748200000	1469500000	1999200000	1796500000	1983000000	1.07741	0.44971
P31930	Cytochrome b-c1 complex subunit 1, mitochondrial	UQCRC1	16	44601000	46778000	41441000	53748000	46520000	44035000	45134000	44013000	0.963198	0.577208
P54886	Delta-1-pyrroline-5-carboxylate synthase;Glutamate 5-kinase;Gamma-glutamyl phosphate reductase	ALDH18A1	44	505560000	540300000	522490000	497520000	502120000	542330000	468030000	505710000	0.97692	0.517797
O43493	Trans-Golgi network integral membrane protein 2	TGOLN2	17	20772000	14429000	13038000	14509000	15736000	10383000	15047000	19156000	0.961337	0.786274
O76071	Probable cytosolic iron-sulfur protein assembly protein CIAO1	CIAO1	2	1127700	1447700	1374100	1008300	857340	1233800	1054900	1608600	0.959022	0.72587
Q8TBX8	Phosphatidylinositol 5-phosphate 4-kinase type-2 gamma	PIP4K2C	3	3169400	1612500	1827400	1859500	2549100	0	2413000	1907200	1.08151	0.601884
Q96M27	Protein PRRC1	PRRC1	6	15431000	11046000	13460000	12709000	21927000	12153000	15037000	22908000	1.3681	0.137839
O00186	Syntaxin-binding protein 3	STXBP3	5	9710400	5786400	7782900	7693400	7339400	7769800	7393200	5926600	0.917861	0.564369
P42224	Signal transducer and activator of transcription 1-alpha/beta	STAT1	16	36251000	34420000	33777000	32778000	36206000	35812000	43182000	40806000	1.13685	0.046987
Q9Y3C0	WASH complex subunit CCDC53	CCDC53	1	3111800	0	0	2205700	2227000	3548400	2439300	2617700	1.01856	0.930347
Q5VYK3	Proteasome-associated protein ECM29 homolog	ECM29	14	12344000	11084000	15959000	12824000	17916000	14425000	14012000	11271000	1.10368	0.468716
P15559	NAD(P)H dehydrogenase [quinone] 1	NQO1	23	349190000	438360000	454680000	411500000	366440000	415880000	471160000	348300000	0.968586	0.717705
Q9NUQ8	ATP-binding cassette sub-family F member 3	ABCF3	1	1592900	1903600	1669500	1772400	1769300	3550800	0	2036000	1.4136	0.162185
P55084	Trifunctional enzyme subunit beta, mitochondrial;3-ketoacyl-CoA thiolase	HADHB	36	431570000	510870000	470330000	521470000	454430000	513750000	504460000	484790000	1.01199	0.798935
P23381	Tryptophan--tRNA ligase, cytoplasmic;T1-TrpRS;T2-TrpRS	WARS	16	77770000	107690000	109140000	103020000	108070000	95130000	85359000	76825000	0.918928	0.469484
O75131	Copine-3	CPNE3	3	8050900	12107000	7072100	8845100	5767900	7870700	7596000	7803000	0.804921	0.184994
Q96A33	Coiled-coil domain-containing protein 47	CCDC47	14	41661000	39248000	38207000	40841000	38781000	32110000	32036000	30593000	0.834724	0.0166877
P35270	Sepiapterin reductase	SPR	9	51321000	47924000	37788000	39996000	44399000	40391000	47495000	45184000	1.00249	0.91729
P07306	Asialoglycoprotein receptor 1	ASGR1	14	144720000	134620000	107280000	134820000	115190000	79611000	115910000	89831000	0.768146	0.0551143
Q969S9	Ribosome-releasing factor 2, mitochondrial	GFM2	3	2529200	1140800	1676500	908180	2335400	1952400	2053500	1283600	1.21907	0.369819
Q9Y624	Junctional adhesion molecule A	F11R	3	7787700	5337000	0	6479400	6620500	0	8103300	6543200	1.08482	0.531988
Q96RQ3	Methylcrotonoyl-CoA carboxylase subunit alpha, mitochondrial	MCCC1	2	2641000	2350800	3872000	3556300	4122200	4452900	3994900	2546400	1.21709	0.302852
P35221	Catenin alpha-1	CTNNA1	12	25065000	18345000	17426000	15322000	22038000	18238000	24239000	22250000	1.13928	0.282611
Q7Z2W4	Zinc finger CCCH-type antiviral protein 1	ZC3HAV1	6	6182100	5345100	5436200	4807700	4936400	5444200	4414800	6282500	0.96816	0.699604
Q7Z7H8	39S ribosomal protein L10, mitochondrial	MRPL10	1	0	1178200	2925100	3794000	4686500	0	801000	1772200	0.919264	0.735496
Q12849	G-rich sequence factor 1	GRSF1	8	12577000	12886000	13873000	9031600	8994200	10737000	12037000	14023000	0.946733	0.695286
Q9H078	Caseinolytic peptidase B protein homolog	CLPB	3	3774200	3104100	2970100	2201500	3954300	2530300	2534700	3895100	1.07174	0.719051
O14776	Transcription elongation regulator 1	TCERG1	5	13765000	6237700	4344000	5090100	7693400	6380500	5088500	6476800	0.870991	0.886903
P49756	RNA-binding protein 25	RBM25	13	17752000	13280000	9286400	11041000	16744000	7937900	11968000	14104000	0.988211	0.932652
P18206	Vinculin	VCL	58	268790000	185820000	215170000	214880000	297780000	228220000	305060000	253240000	1.22567	0.0924076
O94905	Erlin-2	ERLIN2	10	24739000	29171000	23791000	27367000	27768000	30637000	31623000	30084000	1.14318	0.0459758
P31939	Bifunctional purine biosynthesis protein PURH;Phosphoribosylaminoimidazolecarboxamide formyltransferase;IMP cyclohydrolase	ATIC	42	642170000	625790000	621820000	661020000	581700000	575250000	577300000	571430000	0.903905	0.000427482
Q08211	ATP-dependent RNA helicase A	DHX9	54	493250000	372200000	408150000	404650000	477770000	362320000	441710000	426900000	1.01814	0.832036
Q96D71	RalBP1-associated Eps domain-containing protein 1	REPS1	5	2203300	1513900	2283100	1492800	2067400	1258800	1292200	2157000	0.904219	0.568532
P21796	Voltage-dependent anion-selective channel protein 1	VDAC1	12	11783000	22851000	15043000	12489000	12305000	26039000	18447000	27555000	1.35679	0.266612
P14868	Aspartate--tRNA ligase, cytoplasmic	DARS	30	119280000	114940000	137510000	114920000	126570000	137750000	140490000	136460000	1.11224	0.06632
Q6UXN9	WD repeat-containing protein 82	WDR82	1	829370	973600	0	0	540300	0	0	668760	0.670594	0.0947318
O75146	Huntingtin-interacting protein 1-related protein	HIP1R	4	0	2088400	1997000	2118200	3172000	2351200	0	820900	1.02265	0.7806
Q9UNL2	Translocon-associated protein subunit gamma	SSR3	5	13947000	17107000	13580000	19120000	24408000	10484000	24282000	14228000	1.15133	0.70552
Q9Y3C6	Peptidyl-prolyl cis-trans isomerase-like 1	PPIL1	8	37393000	28037000	27160000	40670000	39971000	32739000	42529000	29559000	1.08658	0.531841
P62826	GTP-binding nuclear protein Ran	RAN	17	201480000	169580000	208490000	229520000	224490000	250560000	249770000	238040000	1.19008	0.0394016
P27816	Microtubule-associated protein 4	MAP4	29	128260000	181660000	183420000	146200000	155310000	210370000	165190000	206580000	1.15309	0.260163
Q96AQ6	Pre-B-cell leukemia transcription factor-interacting protein 1	PBXIP1	9	9493500	10007000	5497400	8477300	8006800	10066000	5313700	9146100	0.971842	0.880793
Q13630	GDP-L-fucose synthase	TSTA3	2	5473800	8419800	6160400	6377600	5454900	5650300	6090800	7314900	0.927333	0.560297
Q9ULH0	Kinase D-interacting substrate of 220 kDa	KIDINS220	1	313910	350470	308090	256340	0	0	716710	0	2.33302	1
Q13404	Ubiquitin-conjugating enzyme E2 variant 1	UBE2V1	4	16125000	14858000	12412000	18287000	19419000	16793000	19750000	17132000	1.18501	0.100995
O14979	Heterogeneous nuclear ribonucleoprotein D-like	HNRNPDL	16	34624000	41063000	30088000	38483000	27458000	34939000	43925000	44919000	1.04841	0.80284
Q96JB2	Conserved oligomeric Golgi complex subunit 3	COG3	6	7641300	4562900	8257500	4365600	7371400	4743500	5981700	7210300	1.01932	0.824136
Q6UB35	Monofunctional C1-tetrahydrofolate synthase, mitochondrial	MTHFD1L	16	42233000	35421000	37356000	34128000	34466000	41761000	31513000	53390000	1.08041	0.651436
Q13190	Syntaxin-5	STX5	1	2057300	1482800	1309400	1808900	2103000	0	2655700	1557900	1.26489	0.253509
P09417	Dihydropteridine reductase	QDPR	8	29674000	29139000	38295000	32657000	49612000	43315000	47092000	47482000	1.44493	0.0016139
Q06124	Tyrosine-protein phosphatase non-receptor type 11	PTPN11	6	13698000	11165000	10010000	9849900	18182000	9126300	17529000	9962700	1.22532	0.439469
Q9Y6N5	Sulfide:quinone oxidoreductase, mitochondrial	SQRDL	8	18622000	24023000	22664000	19964000	21638000	31414000	24055000	26068000	1.20994	0.105729
Q92598	Heat shock protein 105 kDa	HSPH1	35	176740000	118010000	139510000	130100000	161890000	124950000	140590000	148700000	1.02086	0.794701
Q9NQR4	Omega-amidase NIT2	NIT2	3	1783900	2608800	3082000	1826900	2058000	3034300	2786800	2749300	1.14264	0.380805
Q9UGP8	Translocation protein SEC63 homolog	SEC63	7	11022000	7038100	8501900	10679000	4628400	7679600	10167000	10754000	0.892269	0.523519
P52907	F-actin-capping protein subunit alpha-1	CAPZA1	10	137300000	59953000	48768000	42554000	42421000	56733000	50135000	39959000	0.655802	0.292969
P04075	Fructose-bisphosphate aldolase A	ALDOA	38	2195900000	2477000000	2001000000	2264500000	1871400000	2038700000	2373900000	2541400000	0.987358	0.842725
Q9UBM7	7-dehydrocholesterol reductase	DHCR7	7	10677000	10733000	10294000	12751000	5070200	9881000	8618500	8717700	0.726294	0.0679145
P35268	60S ribosomal protein L22	RPL22	5	30852000	36788000	27291000	34766000	51511000	34408000	45004000	40231000	1.31965	0.0451827
Q86UP2	Kinectin	KTN1	71	279990000	200610000	194470000	203940000	267840000	190880000	233440000	249720000	1.07152	0.540457
O60884	DnaJ homolog subfamily A member 2	DNAJA2	8	4165800	5736700	4571100	5165900	4890600	5944400	6733300	10999000	1.45458	0.122587
P10619	Lysosomal protective protein;Lysosomal protective protein 32 kDa chain;Lysosomal protective protein 20 kDa chain	CTSA	8	47966000	63378000	54785000	57356000	51208000	65573000	63358000	58216000	1.06654	0.447154
Q13162	Peroxiredoxin-4	PRDX4	9	42140000	54529000	50025000	60173000	48213000	60015000	66094000	52025000	1.09417	0.413673
Q9Y3F4	Serine-threonine kinase receptor-associated protein	STRAP	11	31509000	39306000	30960000	33697000	30304000	34687000	37270000	44592000	1.08401	0.466747
P01892;P10316;P01891;P30459	HLA class I histocompatibility antigen, A-2 alpha chain;HLA class I histocompatibility antigen, A-69 alpha chain;HLA class I histocompatibility antigen, A-68 alpha chain;HLA class I histocompatibility antigen, A-74 alpha chain	HLA-A	4	13135000	13727000	12347000	12643000	10802000	12971000	14239000	13187000	0.987406	0.797646
O95292	Vesicle-associated membrane protein-associated protein B/C	VAPB	6	14711000	9328300	17219000	18804000	17906000	7192800	14484000	19392000	0.981894	0.857485
P29144	Tripeptidyl-peptidase 2	TPP2	11	20126000	16532000	15307000	17155000	18529000	11520000	12989000	9819900	0.764727	0.0940707
P26639	Threonine--tRNA ligase, cytoplasmic	TARS	20	57059000	46167000	47643000	43358000	44630000	54413000	52061000	51711000	1.04422	0.552915
P63010	AP-2 complex subunit beta	AP2B1	11	35181000	16624000	37580000	24076000	26959000	29983000	30440000	29971000	1.0343	0.678962
P62495	Eukaryotic peptide chain release factor subunit 1	ETF1	4	8233200	10060000	9136800	7603200	7653000	9744900	10248000	8890500	1.04291	0.655162
P12814	Alpha-actinin-1	ACTN1	51	885650000	640700000	779920000	730340000	1003600000	733870000	891940000	806390000	1.13146	0.242186
P06737	Glycogen phosphorylase, liver form	PYGL	25	61148000	47178000	64942000	45834000	68262000	60959000	53863000	56335000	1.09273	0.384821
Q4KMQ2	Anoctamin-6	ANO6	5	7003600	4902600	4514900	7471100	6833200	7215200	9005600	8250400	1.31024	0.0868921
O14802	DNA-directed RNA polymerase III subunit RPC1	POLR3A	2	2267400	4195500	2576000	2950500	2690700	2298300	2287900	3387800	0.889511	0.548287
Q8NE71	ATP-binding cassette sub-family F member 1	ABCF1	16	21576000	24200000	23201000	20716000	21702000	24919000	24263000	25169000	1.07091	0.209586
P51610	Host cell factor 1;HCF N-terminal chain 1;HCF N-terminal chain 2;HCF N-terminal chain 3;HCF N-terminal chain 4;HCF N-terminal chain 5;HCF N-terminal chain 6;HCF C-terminal chain 1;HCF C-terminal chain 2;HCF C-terminal chain 3;HCF C-terminal chain 4;HCF C-terminal chain 5;HCF C-terminal chain 6	HCFC1	11	7973200	8756100	8907900	7088700	7833100	12392000	11954000	9616500	1.27714	0.0982035
P33527	Multidrug resistance-associated protein 1	ABCC1	8	6748400	5394700	7742100	6051600	7499000	8826000	6135800	8466200	1.1924	0.169363
P25815	Protein S100-P	S100P	3	9031400	12254000	7390000	13571000	12980000	11982000	12006000	13234000	1.18831	0.20828
P60468	Protein transport protein Sec61 subunit beta	SEC61B	3	9010700	10173000	8455400	11064000	8309500	12696000	11224000	10139000	1.09471	0.465783
P78347	General transcription factor II-I	GTF2I	10	10618000	10658000	18449000	13834000	14071000	15840000	10490000	14058000	1.0168	0.844632
P62316	Small nuclear ribonucleoprotein Sm D2	SNRPD2	7	60620000	39765000	40502000	57094000	59162000	45059000	64379000	33855000	1.0226	0.956675
P31937	3-hydroxyisobutyrate dehydrogenase, mitochondrial	HIBADH	9	31555000	39439000	33424000	39691000	21422000	48087000	45457000	37323000	1.05676	0.943762
Q09161	Nuclear cap-binding protein subunit 1	NCBP1	7	13169000	10854000	9826100	9689300	14460000	9313500	11609000	10636000	1.05696	0.681869
Q9H2V7	Protein spinster homolog 1	SPNS1	2	2655800	1493200	1305300	1140300	1116100	1427700	1478700	1293700	0.806144	0.43236
Q9Y365	PCTP-like protein	STARD10	3	12220000	11614000	7252600	9987800	11170000	9816300	10600000	12170000	1.06529	0.549557
Q9NRF8	CTP synthase 2	CTPS2	2	4087800	11260000	13277000	6167500	8305700	6279700	8612500	5189800	0.815919	0.700618
Q9UHD8	Septin-9	43352	22	32265000	51523000	54266000	39410000	34530000	49734000	37916000	43643000	0.934404	0.71324
Q9HC07	Transmembrane protein 165	TMEM165	5	9067200	6597600	8173000	9331000	13448000	4949600	7957400	10354000	1.10673	0.846214
Q9Y4F1	FERM, RhoGEF and pleckstrin domain-containing protein 1	FARP1	10	22374000	22979000	22419000	17622000	18827000	19789000	21623000	21964000	0.962632	0.650359
Q9Y679	Ancient ubiquitous protein 1	AUP1	3	4562600	5646200	5310000	6209700	4702500	3608500	3988900	5015100	0.79688	0.0602493
O75400	Pre-mRNA-processing factor 40 homolog A	PRPF40A	13	50253000	30291000	31385000	38133000	49822000	21763000	38558000	31135000	0.941464	0.703081
Q7Z7H5	Transmembrane emp24 domain-containing protein 4	TMED4	4	5268000	5929700	5696600	5405500	7240100	6785900	8953000	8616100	1.41683	0.00311495
Q92506	Estradiol 17-beta-dehydrogenase 8	HSD17B8	1	892360	1490700	1517900	1260900	1741300	1730400	0	1094500	1.17947	0.436914
O15198;P84022;Q15796	Mothers against decapentaplegic homolog 9;Mothers against decapentaplegic homolog 3;Mothers against decapentaplegic homolog 2	SMAD9;SMAD3;SMAD2	2	0	2256400	2798300	0	4634600	3162300	2062000	3285600	1.30023	0.425678
P09525	Annexin A4	ANXA4	29	205190000	330150000	272040000	241860000	241870000	266420000	269330000	281360000	1.00928	0.835272
Q99797	Mitochondrial intermediate peptidase	MIPEP	3	3028100	2537800	4347900	3917500	2536900	3515400	4667000	3719700	1.04394	0.818873
Q15029	116 kDa U5 small nuclear ribonucleoprotein component	EFTUD2	34	148610000	115470000	139430000	123790000	144540000	124380000	139280000	128400000	1.01764	0.769101
P28331	NADH-ubiquinone oxidoreductase 75 kDa subunit, mitochondrial	NDUFS1	12	20563000	18335000	21646000	18649000	16438000	18518000	24430000	20132000	1.0041	0.96589
P67775;P62714	Serine/threonine-protein phosphatase 2A catalytic subunit alpha isoform;Serine/threonine-protein phosphatase 2A catalytic subunit beta isoform	PPP2CA;PPP2CB	12	20491000	26503000	29589000	25230000	22074000	40218000	30503000	39437000	1.29877	0.180902
P50570	Dynamin-2	DNM2	8	13058000	16148000	15638000	14665000	12933000	15883000	13637000	15969000	0.981734	0.793579
P45880	Voltage-dependent anion-selective channel protein 2	VDAC2	3	0	6541900	0	4301800	3089700	6577700	5231000	5875700	0.957888	0.843408
Q8NDI1	EH domain-binding protein 1	EHBP1	7	11689000	13924000	10025000	12166000	11043000	11954000	7444200	13958000	0.928776	0.560411
Q9Y4G6	Talin-2	TLN2	3	1824700	0	1424300	0	1568900	1612000	2174200	978030	0.974628	0.836639
P46937	Transcriptional coactivator YAP1	YAP1	7	6136800	10749000	12646000	9861600	18572000	13574000	5126100	10874000	1.22219	0.685693
P78527	DNA-dependent protein kinase catalytic subunit	PRKDC	127	374830000	473070000	486210000	339100000	446620000	517660000	405050000	497570000	1.11576	0.305877
P06753	Tropomyosin alpha-3 chain	TPM3	7	59263000	84593000	100620000	77684000	78308000	87364000	64498000	98934000	1.02155	0.856323
P30825	High affinity cationic amino acid transporter 1	SLC7A1	2	2653200	2220400	3085500	1821600	2275400	1665400	1787700	1983400	0.788481	0.139548
Q9Y639	Neuroplastin	NPTN	3	4411500	4731700	2143200	4042500	4234600	2743500	4935400	2478500	0.93888	0.815012
Q8WUM0	Nuclear pore complex protein Nup133	NUP133	8	11395000	11220000	7828400	9435300	14763000	8870200	11293000	8069800	1.07817	0.729093
P04183	Thymidine kinase, cytosolic	TK1	1	986710	1513300	2421200	1819500	1222400	1915800	1126600	1968300	0.924695	0.812497
Q14677	Clathrin interactor 1	CLINT1	7	9351300	6146600	4827800	6222400	7248200	6920100	6832200	8304900	1.10386	0.419494
Q02978	Mitochondrial 2-oxoglutarate/malate carrier protein	SLC25A11	3	0	0	1732000	1902800	0	2538400	1607100	1596700	1.05319	0.896932
Q9UJC3	Protein Hook homolog 1	HOOK1	4	2581200	2634900	1675200	2290700	1438400	1667700	1639800	2807600	0.822642	0.279614
P12956	X-ray repair cross-complementing protein 6	XRCC6	51	769560000	784810000	738460000	699760000	739680000	654450000	747880000	694240000	0.947758	0.224913
Q04206	Transcription factor p65	RELA	3	2170300	2611700	1457000	1992900	1589400	1985600	0	0	0.868572	0.554683
Q12907	Vesicular integral-membrane protein VIP36	LMAN2	7	27594000	50651000	52527000	53311000	49250000	50308000	54170000	33574000	1.01749	0.860679
P37837	Transaldolase	TALDO1	24	423700000	471290000	345950000	384040000	376380000	404230000	452670000	461610000	1.04302	0.600806
Q9UBX3	Mitochondrial dicarboxylate carrier	SLC25A10	7	2819300	4647600	3663000	5309900	5932200	12980000	8660700	8751800	2.20956	0.0101884
P11137	Microtubule-associated protein 2	MAP2	3	4380000	3199200	7081600	8772600	4818700	0	0	9254400	1.20111	0.630182
P04406	Glyceraldehyde-3-phosphate dehydrogenase	GAPDH	46	3540300000	5225300000	4070900000	4297700000	3277800000	4919600000	4202500000	3703200000	0.939822	0.61107
P55036	26S proteasome non-ATPase regulatory subunit 4	PSMD4	13	69966000	61362000	61529000	52991000	53214000	57985000	53832000	64976000	0.935566	0.407688
O43148	mRNA cap guanine-N7 methyltransferase	RNMT	4	6635200	6345600	5536200	3630200	4498100	4516300	8875100	5982800	1.07789	0.783535
P10253	Lysosomal alpha-glucosidase;76 kDa lysosomal alpha-glucosidase;70 kDa lysosomal alpha-glucosidase	GAA	19	127580000	128180000	129480000	116450000	125370000	134490000	124290000	113470000	0.991887	0.838911
P22059	Oxysterol-binding protein 1	OSBP	4	4819500	4056200	4599700	4909000	6157300	4224100	2115600	2411300	0.810921	0.278953
Q13310	Polyadenylate-binding protein 4	PABPC4	11	33321000	39190000	30252000	33685000	24503000	36444000	33584000	33175000	0.935932	0.503705
P52789	Hexokinase-2	HK2	20	27874000	31784000	26039000	25340000	21011000	23135000	22464000	30903000	0.878203	0.215171
P07384	Calpain-1 catalytic subunit	CAPN1	9	11229000	17661000	14245000	13182000	17378000	21230000	16085000	18203000	1.29439	0.0530967
P36542	ATP synthase subunit gamma, mitochondrial	ATP5C1	15	43577000	58022000	66995000	60142000	40740000	73038000	64777000	69575000	1.08479	0.687239
P40429	60S ribosomal protein L13a	RPL13A	13	46483000	57111000	53386000	62483000	51659000	76223000	69903000	94527000	1.33194	0.102375
P55210	Caspase-7;Caspase-7 subunit p20;Caspase-7 subunit p11	CASP7	4	2916400	1601300	1601300	2513100	2292700	1341400	2715800	0	0.98082	0.923196
Q14257	Reticulocalbin-2	RCN2	8	28451000	14445000	16384000	19539000	22833000	13813000	22909000	19063000	0.99745	0.953712
Q86XP3	ATP-dependent RNA helicase DDX42	DDX42	19	55008000	37677000	28951000	36644000	52634000	43777000	53042000	54324000	1.28745	0.0992521
Q9HAV4	Exportin-5	XPO5	23	52815000	44576000	45897000	58211000	51288000	47348000	50852000	55068000	1.01517	0.788636
Q08477;P78329;Q9HCS2;Q9HBI6	Docosahexaenoic acid omega-hydroxylase CYP4F3;Phylloquinone omega-hydroxylase CYP4F2;Cytochrome P450 4F12;Phylloquinone omega-hydroxylase CYP4F11	CYP4F3;CYP4F2;CYP4F12;CYP4F11	1	3064500	2647600	3642600	3946900	3009700	1907200	3711000	2680200	0.850131	0.32165
P49419	Alpha-aminoadipic semialdehyde dehydrogenase	ALDH7A1	31	257620000	249160000	263390000	266560000	194510000	286730000	216240000	267060000	0.930368	0.394206
P27797	Calreticulin	CALR	36	1403100000	1234300000	1281200000	1183500000	1054100000	799670000	1068200000	967110000	0.762251	0.0109208
Q07812	Apoptosis regulator BAX	BAX	6	52633000	41859000	37942000	37829000	47893000	37980000	62364000	33743000	1.06882	0.770229
Q15369	Transcription elongation factor B polypeptide 1	TCEB1	4	11298000	9098900	10605000	14306000	17473000	13862000	13891000	6256600	1.13628	0.768891
Q14697	Neutral alpha-glucosidase AB	GANAB	46	643340000	471540000	594950000	550400000	618790000	484940000	609920000	517330000	0.987059	0.897996
P63261;P60709	Actin, cytoplasmic 2;Actin, cytoplasmic 2, N-terminally processed;Actin, cytoplasmic 1;Actin, cytoplasmic 1, N-terminally processed	ACTG1;ACTB	15	4487700000	6308200000	5928000000	5295500000	5146500000	6925000000	7236800000	6962600000	1.19308	0.156811
Q12769	Nuclear pore complex protein Nup160	NUP160	7	9294200	4844800	5835700	7056100	10452000	7211600	8360700	3847800	1.10511	0.801678
P31689	DnaJ homolog subfamily A member 1	DNAJA1	12	44403000	30855000	34131000	33963000	34556000	30640000	34496000	39477000	0.97082	0.805202
Q9UMS4	Pre-mRNA-processing factor 19	PRPF19	19	97381000	99830000	98044000	95093000	83346000	92041000	108200000	93025000	0.964811	0.491969
Q92696	Geranylgeranyl transferase type-2 subunit alpha	RABGGTA	4	5492400	6719900	8264800	5667000	4675500	5844200	3649800	8018500	0.848681	0.353821
Q9GZP9	Derlin-2	DERL2	1	3674200	2307100	2757900	5799700	8053000	0	6148400	2229900	1.50688	0.43805
Q9C0I1	Myotubularin-related protein 12	MTMR12	3	0	920470	0	1947200	3546200	1765500	2263700	1465800	1.5764	0.272653
O00178	GTP-binding protein 1	GTPBP1	2	1945100	1765200	3107300	2939000	2985400	2258000	2536700	2620900	1.06605	0.583421
Q9H6V9	UPF0554 protein C2orf43	C2orf43	1	2097100	2408000	1560000	1548800	1971000	1583700	3527800	1751900	1.1603	0.605723
Q8NF37	Lysophosphatidylcholine acyltransferase 1	LPCAT1	2	1766900	0	1803800	1362000	1554900	1528200	1101600	1557500	0.873082	0.322605
P52597	Heterogeneous nuclear ribonucleoprotein F;Heterogeneous nuclear ribonucleoprotein F, N-terminally processed	HNRNPF	17	172670000	181410000	191020000	212230000	193900000	237030000	205940000	230990000	1.14595	0.0810496
P53634	Dipeptidyl peptidase 1;Dipeptidyl peptidase 1 exclusion domain chain;Dipeptidyl peptidase 1 heavy chain;Dipeptidyl peptidase 1 light chain	CTSC	4	13247000	17320000	22106000	20539000	18893000	22464000	25433000	16497000	1.13761	0.400853
P08195	4F2 cell-surface antigen heavy chain	SLC3A2	30	503110000	395690000	433270000	485770000	528020000	418700000	578870000	406800000	1.06301	0.615658
Q9UNM6	26S proteasome non-ATPase regulatory subunit 13	PSMD13	13	22600000	30035000	27408000	32258000	25701000	35577000	29859000	37743000	1.14763	0.289491
Q07157	Tight junction protein ZO-1	TJP1	9	6618100	11172000	6809600	4362100	5962700	9481300	6581000	6278100	0.977256	0.946318
P10768	S-formylglutathione hydrolase	ESD	14	100660000	114180000	83043000	97727000	88650000	103270000	124840000	108590000	1.07518	0.486601
Q13617	Cullin-2	CUL2	3	0	615440	721580	664420	1420600	896570	779540	1718400	1.80437	0.0609942
P08833	Insulin-like growth factor-binding protein 1	IGFBP1	1	1107500	2242300	1969400	2981500	1116500	851790	1040000	0	0.483219	0.0461412
P52292	Importin subunit alpha-1	KPNA2	11	59715000	57033000	50824000	51952000	55397000	56175000	60884000	55467000	1.03826	0.413437
Q8WWY3	U4/U6 small nuclear ribonucleoprotein Prp31	PRPF31	6	6620100	5664000	5840600	5936000	3944900	6694700	6027200	8470300	1.04474	0.957291
P43686	26S protease regulatory subunit 6B	PSMC4	18	98318000	106050000	94961000	103340000	90564000	92334000	86813000	99305000	0.916425	0.0579496
Q7Z6Z7	E3 ubiquitin-protein ligase HUWE1	HUWE1	31	42363000	38364000	36928000	32680000	47337000	40127000	34338000	53325000	1.16491	0.240943
Q5JPH6	Probable glutamate--tRNA ligase, mitochondrial	EARS2	5	10694000	8840100	10393000	7828800	9258900	8542500	8341000	7403100	0.888484	0.236737
O95297	Myelin protein zero-like protein 1	MPZL1	2	3020100	4097700	3454800	2897400	2311100	2878900	2754100	3780200	0.870401	0.300733
Q15008	26S proteasome non-ATPase regulatory subunit 6	PSMD6	11	47017000	40653000	32778000	50014000	49274000	38397000	63508000	34168000	1.08732	0.699465
P07900	Heat shock protein HSP 90-alpha	HSP90AA1	61	2208800000	1527500000	1573200000	1516800000	1922600000	1291300000	1522800000	1374500000	0.895243	0.418288
O15400	Syntaxin-7	STX7	4	6238900	6606400	6826400	4503200	6274100	8884000	5192800	7751900	1.16248	0.383273
P83916	Chromobox protein homolog 1	CBX1	8	8512200	7667200	9047600	20911000	10016000	12373000	12098000	9705000	0.957822	0.869451
P18124	60S ribosomal protein L7	RPL7	19	132220000	186960000	175870000	189320000	151790000	205960000	193390000	202940000	1.10186	0.39972
P62491;Q15907	Ras-related protein Rab-11A;Ras-related protein Rab-11B	RAB11A;RAB11B	8	13045000	15167000	20102000	20071000	24249000	32133000	18934000	28005000	1.51087	0.038712
Q14571	Inositol 1,4,5-trisphosphate receptor type 2	ITPR2	13	11173000	9387300	14123000	9625100	14373000	8376500	11205000	11017000	1.01497	0.945143
P49411	Elongation factor Tu, mitochondrial	TUFM	35	456750000	528710000	488530000	494340000	441510000	536720000	502640000	573380000	1.04365	0.555847
P30044	Peroxiredoxin-5, mitochondrial	PRDX5	9	47447000	38359000	37401000	51447000	65005000	56800000	55469000	46101000	1.27896	0.057449
P58107	Epiplakin	EPPK1	13	10114000	1933000	9786300	14660000	9786800	9936500	17745000	10902000	1.32546	0.35298
Q71UM5	40S ribosomal protein S27-like	RPS27L	1	23317000	24078000	16464000	17288000	24833000	18309000	26937000	18779000	1.09503	0.536446
P01023	Alpha-2-macroglobulin	A2M	42	176540000	130450000	173580000	163030000	163300000	127440000	116580000	107560000	0.8	0.0919592
Q9Y2X3	Nucleolar protein 58	NOP58	17	62035000	57078000	52267000	54069000	50528000	59353000	61257000	76147000	1.09686	0.398993
O15067	Phosphoribosylformylglycinamidine synthase	PFAS	31	91584000	107980000	101140000	89928000	80360000	85490000	79267000	87747000	0.852117	0.0186382
Q92621	Nuclear pore complex protein Nup205	NUP205	8	6680500	3119800	11429000	6538200	12626000	9775600	6913500	5129400	1.24046	0.465568
Q96DH6	RNA-binding protein Musashi homolog 2	MSI2	2	11563000	14366000	14586000	14201000	13393000	19909000	9669900	7180300	0.916591	0.51813
Q9H0E2	Toll-interacting protein	TOLLIP	2	8619000	8891100	10329000	10320000	13570000	8690500	10408000	5660400	1.00445	0.838309
Q96DI7	U5 small nuclear ribonucleoprotein 40 kDa protein	SNRNP40	5	9402100	5283700	12765000	12662000	9537600	8053700	5809200	7225200	0.763489	0.362601
Q15477	Helicase SKI2W	SKIV2L	2	1129600	1225200	1515200	1874300	1479700	934130	1237700	0	0.847572	0.393961
Q9H501	ESF1 homolog	ESF1	4	2613200	2176500	0	2828600	3402600	2184700	2310600	2805500	1.05372	0.765424
P22087	rRNA 2-O-methyltransferase fibrillarin	FBL	15	76896000	87415000	69662000	75245000	73899000	85509000	103160000	115050000	1.2212	0.13387
Q9BYD6	39S ribosomal protein L1, mitochondrial	MRPL1	4	4667100	3433000	2707800	4967700	2332000	2935000	3796300	4640600	0.868677	0.507255
O14975	Very long-chain acyl-CoA synthetase	SLC27A2	1	3713800	3141100	3106600	5895500	3505900	2371500	0	3631900	0.799588	0.375752
Q9UBF2	Coatomer subunit gamma-2	COPG2	2	6675200	3024300	3859700	4757700	5388000	4607400	5652400	5091700	1.13226	0.380635
Q8IXB1	DnaJ homolog subfamily C member 10	DNAJC10	6	8651000	7819400	12324000	10599000	9576900	10001000	11491000	12853000	1.11496	0.372404
Q53EP0	Fibronectin type III domain-containing protein 3B	FNDC3B	4	3556000	3546200	3455600	3971600	2448900	2856800	2373300	3620300	0.777685	0.0400862
Q9GZT3	SRA stem-loop-interacting RNA-binding protein, mitochondrial	SLIRP	4	44870000	38985000	34700000	44414000	54763000	37086000	48327000	42952000	1.1237	0.319648
O15144	Actin-related protein 2/3 complex subunit 2	ARPC2	7	5477300	6538100	6711200	8853800	5216600	9473000	6674100	6731600	1.01867	0.948526
P30622	CAP-Gly domain-containing linker protein 1	CLIP1	3	4263800	0	0	3623100	1539300	1635300	4706700	4092100	0.759069	0.421986
Q9BUQ8	Probable ATP-dependent RNA helicase DDX23	DDX23	4	3343100	2716900	2350900	2705100	2727400	2583300	2413800	3181900	0.981144	0.867098
P23368	NAD-dependent malic enzyme, mitochondrial	ME2	3	7225700	5563100	6004800	4486600	6745700	6393600	5826600	7018700	1.11617	0.295916
Q99873	Protein arginine N-methyltransferase 1	PRMT1	11	17444000	34387000	27453000	34929000	27642000	41779000	30593000	48956000	1.30432	0.237057
Q16555	Dihydropyrimidinase-related protein 2	DPYSL2	33	488230000	489290000	488780000	416910000	436650000	422260000	410670000	428710000	0.901806	0.0516951
Q9UI30	Multifunctional methyltransferase subunit TRM112-like protein	TRMT112	2	9148100	2788300	5661400	2717100	6780700	3552100	6650100	2721200	0.969933	0.946099
O75821	Eukaryotic translation initiation factor 3 subunit G	EIF3G	15	73308000	74882000	56816000	64097000	65382000	51405000	76081000	50500000	0.904367	0.390046
Q14978	Nucleolar and coiled-body phosphoprotein 1	NOLC1	19	49749000	39349000	26333000	32079000	38715000	27572000	31266000	48687000	0.99139	0.981886
P20339	Ras-related protein Rab-5A	RAB5A	3	0	716340	1292300	1585000	1949100	0	3745300	3088300	2.44396	0.0412786
Q00535	Cyclin-dependent-like kinase 5	CDK5	3	6089300	2981600	6274500	5573300	5635900	5063600	8062300	3504500	1.06442	0.815685
O95810	Serum deprivation-response protein	SDPR	5	3905800	7702500	4568000	4154200	7625100	6340200	7541400	8183700	1.46039	0.0453984
[truncated: 635 more rows]

## Sheet: Significant
Majority protein IDs	Protein names	Gene Names	Unique peptides	Fold Change	pvalue
Q9Y3Y2	Chromatin target of PRMT1 protein	CHTOP	3	0.388411	0.039032
P30041	Peroxiredoxin-6	PRDX6	24	0.482156	0.00205301
Q14739	Lamin-B receptor	LBR	3	0.521715	0.013493
Q9NZT2	Opioid growth factor receptor	OGFR	6	0.542346	0.0146955
Q7Z4H8	KDEL motif-containing protein 2	KDELC2	3	0.549509	0.02247
Q53EL6	Programmed cell death protein 4	PDCD4	6	0.557243	0.0194173
Q9H1B7	Interferon regulatory factor 2-binding protein-like	IRF2BPL	4	0.568069	0.0402105
P42025	Beta-centractin	ACTR1B	2	0.580259	0.02472
Q14019	Coactosin-like protein	COTL1	2	0.607209	0.0486607
O14617	AP-3 complex subunit delta-1	AP3D1	4	0.611981	0.0279482
Q8TEA8	D-tyrosyl-tRNA(Tyr) deacylase 1	DTD1	2	0.617958	0.0311918
Q68CZ2	Tensin-3	TNS3	15	0.621436	0.0186345
P22413	Ectonucleotide pyrophosphatase/phosphodiesterase family member 1;Alkaline phosphodiesterase I;Nucleotide pyrophosphatase	ENPP1	12	0.640281	0.00145404
Q9P265	Disco-interacting protein 2 homolog B	DIP2B	2	0.648343	0.0450296
Q9BQP7	Mitochondrial genome maintenance exonuclease 1	MGME1	6	0.648362	0.0223824
Q8N6T3	ADP-ribosylation factor GTPase-activating protein 1	ARFGAP1	4	0.654616	0.0163643
Q14833	Metabotropic glutamate receptor 4	GRM4	2	0.655448	0.0138833
Q9Y2L1	Exosome complex exonuclease RRP44	DIS3	5	0.670097	0.0270499
Q9BRJ6	Uncharacterized protein C7orf50	C7orf50	4	1.50032	0.0082599
P62491;Q15907	Ras-related protein Rab-11A;Ras-related protein Rab-11B	RAB11A;RAB11B	8	1.51087	0.038712
Q99439	Calponin-2	CNN2	8	1.52855	0.0178826
P60660	Myosin light polypeptide 6	MYL6	5	1.53514	0.0217978
Q96G61;Q8NFP7;Q9NZJ9	Diphosphoinositol polyphosphate phosphohydrolase 3-beta;Diphosphoinositol polyphosphate phosphohydrolase 3-alpha;Diphosphoinositol polyphosphate phosphohydrolase 2	NUDT11;NUDT10;NUDT4	3	1.56494	0.0174945
P42285	Superkiller viralicidic activity 2-like 2	SKIV2L2	7	1.58302	0.0113688
Q5QJE6	Deoxynucleotidyltransferase terminal-interacting protein 2	DNTTIP2	4	1.60777	0.00351529
Q9NR31;Q9Y6B6	GTP-binding protein SAR1a;GTP-binding protein SAR1b	SAR1A;SAR1B	2	1.62276	0.00314522
P51149	Ras-related protein Rab-7a	RAB7A	9	1.65801	0.000958537
O75351	Vacuolar protein sorting-associated protein 4B	VPS4B	4	1.67184	0.0464214
Q93008;O00507	Probable ubiquitin carboxyl-terminal hydrolase FAF-X;Probable ubiquitin carboxyl-terminal hydrolase FAF-Y	USP9X;USP9Y	8	1.67235	0.0305624
P62807;Q99880;Q99879;Q99877;Q93079;Q5QNW6;P58876;O60814;P57053;Q96A08	Histone H2B type 1-C/E/F/G/I;Histone H2B type 1-L;Histone H2B type 1-M;Histone H2B type 1-N;Histone H2B type 1-H;Histone H2B type 2-F;Histone H2B type 1-D;Histone H2B type 1-K;Histone H2B type F-S;Histone H2B type 1-A	HIST1H2BC;HIST1H2BL;HIST1H2BM;HIST1H2BN;HIST1H2BH;HIST2H2BF;HIST1H2BD;HIST1H2BK;H2BFS;HIST1H2BA	2	1.77746	0.00338853
Q14108	Lysosome membrane protein 2	SCARB2	3	1.82952	0.0347867
P29992	Guanine nucleotide-binding protein subunit alpha-11	GNA11	2	1.83102	0.0326875
Q01995	Transgelin	TAGLN	10	1.90844	0.0096222
P61020	Ras-related protein Rab-5B	RAB5B	2	1.93361	0.0172621
Q9H8S9;Q7L9L4	MOB kinase activator 1A;MOB kinase activator 1B	MOB1A;MOB1B	3	1.97922	0.00175235
Q9UBX3	Mitochondrial dicarboxylate carrier	SLC25A10	7	2.20956	0.0101884
Q15149	Plectin	PLEC	34	2.39143	0.0145546
P20339	Ras-related protein Rab-5A	RAB5A	3	2.44396	0.0412786
Q13492	Phosphatidylinositol-binding clathrin assembly protein	PICALM	3	+inf	0
Q06278	Aldehyde oxidase	AOX1	4	+inf	0

## Sheet: GOTERM_Enrichment
Category	Term	Count	%	PValue	Genes	List Total	Pop Hits	Pop Total	Fold Enrichment	Bonferroni	Benjamini	FDR
GOTERM_BP_DIRECT	GO:0030100~regulation of endocytosis	4	10	4.60018e-05	Q13492, P20339, Q8N6T3, P61020	39	31	16792	55.5567	0.0119804	0.0119804	0.0601846
GOTERM_BP_DIRECT	GO:0015031~protein transport	6	15	0.00186037	P20339, O75351, Q8N6T3, P61020, P62491, P51149	39	395	16792	6.54021	0.386068	0.216462	2.40743
GOTERM_BP_DIRECT	GO:0016192~vesicle-mediated transport	4	10	0.00486419	Q13492, Q9NR31, O14617, P62491	39	152	16792	11.3306	0.721275	0.346781	6.18184
GOTERM_BP_DIRECT	GO:0007264~small GTPase mediated signal transduction	4	10	0.0179677	P20339, P61020, P62491, P51149	39	246	16792	7.00104	0.991351	0.695043	21.1227
GOTERM_BP_DIRECT	GO:0098609~cell-cell adhesion	4	10	0.0231407	P30041, Q13492, Q99439, Q15149	39	271	16792	6.35519	0.997832	0.706777	26.3904
GOTERM_BP_DIRECT	GO:0006897~endocytosis	3	7.5	0.0393877	Q13492, P20339, P51149	39	139	16792	9.29275	0.999973	0.827044	40.8967

## Sheet: KEGG_Enrichment
Category	Term	Count	%	PValue	Genes	List Total	Pop Hits	Pop Total	Fold Enrichment	Bonferroni	Benjamini	FDR
KEGG_PATHWAY	hsa04144:Endocytosis	6	15	0.000509682	P20339, O75351, Q8N6T3, P61020, P62491, P51149	21	241	6879	8.15531	0.0236764	0.0236764	0.483059
KEGG_PATHWAY	hsa05146:Amoebiasis	4	10	0.00335019	P20339, P61020, P51149, P29992	21	106	6879	12.3612	0.145914	0.0758323	3.13716
KEGG_PATHWAY	hsa04962:Vasopressin-regulated water reabsorption	3	7.5	0.00706161	P20339, P61020, P62491	21	44	6879	22.3344	0.283282	0.105083	6.50952
