# Supplementary material for: Peroxiredoxin 6 Down-Regulation Induces Metabolic Remodeling and Cell Cycle Arrest in HepG2 Cells
Source: MDPI journal article supplement (doi:10.3390/antiox8110505), 2019-10-23
Supplement: s1 [file Suppl. file 2-v2-1.xlsx]

## Sheet: DATA
Peptide	Accesion	Protein Name	NT	NT	NT	NT	siRNA-Prdx6	siRNA-Prdx6	siRNA-Prdx6	siRNA-Prdx6	Fold Change	pvalue
EQVPSLGSNVACGLAYTDYHK	A1L0T0	Acetolactate synthase-like protein OS=Homo sapiens OX=9606 GN=ILVBL PE=1 SV=2	4.9339	3.4685	2.1931	3.6558	3.1552	2.8666	2.4451	2.9683	0.802397	0.270833
FIFDCVSQEYGINPER	A6NDG6	Glycerol-3-phosphate phosphatase OS=Homo sapiens OX=9606 GN=PGP PE=1 SV=1	10.5357	10.45	11.9301	NA	6.9673	3.2388	5.1989	1.254	0.379582	0.00641343
CLEEFELLGK	B5ME19	Eukaryotic translation initiation factor 3 subunit C-like protein OS=Homo sapiens OX=9606 GN=EIF3CL PE=3 SV=1	1.3167	2.7949	2.5106	4.0833	0.6713	2.8495	2.6566	1.1101	0.680725	0.319877
CGTGIVGVFVK	O00151	PDZ and LIM domain protein 1 OS=Homo sapiens OX=9606 GN=PDLIM1 PE=1 SV=4	1.9963	2.3696	3.9411	3.8982	0.9435	1.5032	2.6735	2.5223	0.626168	0.13211
LLQFYAETCPAPER	O00159	Unconventional myosin-Ic OS=Homo sapiens OX=9606 GN=MYO1C PE=1 SV=4	0.5918	0.6844	1.0079	1.2977	0.709	0.5413	1.5588	1.3335	1.15657	0.64837
HCCGVAQMR	O00170	AH receptor-interacting protein OS=Homo sapiens OX=9606 GN=AIP PE=1 SV=2	22.4019	NA	16.1893	17.3555	72.4044	6.3608	NA	19.1348	1.74988	0.529043
CVAQASK	O00231	26S proteasome non-ATPase regulatory subunit 11 OS=Homo sapiens OX=9606 GN=PSMD11 PE=1 SV=3	4.0977	4.0306	4.5944	4.8704	3.7864	6.0931	6.2962	5.5996	1.23772	0.135206
GLATFCLDK	O00264; O15173	Membrane-associated progesterone receptor component 1 OS=Homo sapiens OX=9606 GN=PGRMC1 PE=1 SV=3	0.2085	0.6338	0.779	0.4206	0.8591	0.3123	0.1762	NA	0.879965	0.79936
LHIVQVVCKK	O00299	Chloride intracellular channel protein 1 OS=Homo sapiens OX=9606 GN=CLIC1 PE=1 SV=4	0.0529492	0.0726126	0.0909621	NA	NA	0.0995355	0.133705	0.147545	1.75863	0.038335
KFLDGNELTLADCNLLPK	O00299	Chloride intracellular channel protein 1 OS=Homo sapiens OX=9606 GN=CLIC1 PE=1 SV=4	0.0933	0.071	0.0946	0.103	0.0611	0.0779	0.1067	0.0854	0.914894	0.533837
EEFASTCPDDEEIELAYEQVAK	O00299	Chloride intracellular channel protein 1 OS=Homo sapiens OX=9606 GN=CLIC1 PE=1 SV=4	0.0191887	0.0343975	NA	0.0262212	NA	0.0473134	0.0418084	0.0164953	1.3234	0.4569
YAEYFLRPMLQYVCDNSPEVR	O00410	Importin-5 OS=Homo sapiens OX=9606 GN=IPO5 PE=1 SV=4	0.873	1.5787	0.93	1.9487	1.5789	1.4966	1.6625	1.5564	1.18085	0.394177
CYVQPQWVFDSVNAR	O00541	Pescadillo homolog OS=Homo sapiens OX=9606 GN=PES1 PE=1 SV=1	15.1225	NA	16.9125	12.2067	NA	17.5665	19.4891	19.9303	1.28806	0.0520111
IINDNATYCR	O00567	Nucleolar protein 56 OS=Homo sapiens OX=9606 GN=NOP56 PE=1 SV=4	1.3031	3.2468	1.7061	1.5699	0.83	1.3699	1.5547	1.4235	0.661662	0.205575
LAALALASSENSSSTPEECEEMSEKPK	O00567	Nucleolar protein 56 OS=Homo sapiens OX=9606 GN=NOP56 PE=1 SV=4	2.3701	2.1018	2.3498	1.7198	2.0374	1.8221	1.3016	1.4186	0.770321	0.0759955
LVAFCPFASSQVALENANAVSEGVVHEDLR	O00567	Nucleolar protein 56 OS=Homo sapiens OX=9606 GN=NOP56 PE=1 SV=4	NA	3.6783	3.9947	4.4423	3.6534	4.4734	5.3733	5.6061	1.18277	0.244965
GCHLLVATPGR	O00571	ATP-dependent RNA helicase DDX3X OS=Homo sapiens OX=9606 GN=DDX3X PE=1 SV=3	NA	1.2996	1.4424	1.2447	0.6082	0.7759	1.1541	0.7653	0.621473	0.0182176
VRPCVVYGGADIGQQIR	O00571	ATP-dependent RNA helicase DDX3X OS=Homo sapiens OX=9606 GN=DDX3X PE=1 SV=3	NA	1.1973	1.4968	1.3597	1.0852	1.2673	1.8844	0.8877	0.94811	0.801938
DLMACAQTGSGK	O00571	ATP-dependent RNA helicase DDX3X OS=Homo sapiens OX=9606 GN=DDX3X PE=1 SV=3	NA	7.3499	6.1786	7.7109	2.1715	7.3108	5.7772	6.1661	0.756575	0.263848
IVEVNGVCMEGKQHGDVVSAIR	O14745	Na(+)/H(+) exchange regulatory cofactor NHE-RF1 OS=Homo sapiens OX=9606 GN=SLC9A3R1 PE=1 SV=4	1.1271	2.11	5.3065	3.0859	1.7097	3.4067	5.2332	6.4813	1.44726	0.380885
VCEPCYEQLNR	O14964	Hepatocyte growth factor-regulated tyrosine kinase substrate OS=Homo sapiens OX=9606 GN=HGS PE=1 SV=1	3.0798	3.1996	NA	4.4589	5.1981	2.6204	NA	5.1458	1.2073	0.481943
YHQIGSGKCEIK	O14979	Heterogeneous nuclear ribonucleoprotein D-like OS=Homo sapiens OX=9606 GN=HNRNPDL PE=1 SV=3	5.2166	3.5369	4.9504	NA	2.4653	NA	2.0287	2.4054	0.503463	0.0135936
QMSVPGIFNPHEIPEEMCD	O14980	Exportin-1 OS=Homo sapiens OX=9606 GN=XPO1 PE=1 SV=1	11.5345	13.9938	12.8731	13.704	NA	13.6632	13.8099	15.8342	1.1082	0.168837
TSESLCQNNMVILK	O14980	Exportin-1 OS=Homo sapiens OX=9606 GN=XPO1 PE=1 SV=1	1.5678	1.5911	1.6805	2.1468	1.8274	2.0591	2.7596	2.6333	1.32825	0.0711344
HVVFTAETHNFPTGVCPFSGATTGTGGR	O15067	Phosphoribosylformylglycinamidine synthase OS=Homo sapiens OX=9606 GN=PFAS PE=1 SV=4	4.933	4.7584	7.6231	6.599	5.3443	7.5422	5.4513	6.7595	1.0495	0.744969
IRDVQCTGR	O15067	Phosphoribosylformylglycinamidine synthase OS=Homo sapiens OX=9606 GN=PFAS PE=1 SV=4	NA	0.4313	0.267	0.3562	0.6422	NA	0.3467	0.4121	1.32859	0.318333
NNASPFDAPCR	O15321	Transmembrane 9 superfamily member 1 OS=Homo sapiens OX=9606 GN=TM9SF1 PE=2 SV=2	2.7979	2.5027	2.4387	1.6377	2.2268	1.6084	2.2942	3.3444	1.01032	0.957665
CSGDGVGAPR	O15355	Protein phosphatase 1G OS=Homo sapiens OX=9606 GN=PPM1G PE=1 SV=1	4.1253	4.6333	NA	5.2775	5.949	2.5918	5.6856	4.9102	1.02254	0.915515
GTEAGQVGEPGIPTGEAGPSCSSASDKLPR	O15355	Protein phosphatase 1G OS=Homo sapiens OX=9606 GN=PPM1G PE=1 SV=1	6.9867	8.2853	7.25	6.1655	7.7195	NA	7.0764	8.327	1.0747	0.412055
YGQNCHKGPPHSK	O15355	Protein phosphatase 1G OS=Homo sapiens OX=9606 GN=PPM1G PE=1 SV=1	2.5026	2.2765	2.597	3.8606	2.8575	2.1146	3.127	4.4527	1.11704	0.606039
FMTPVIQDNPSGWGPCAVPEQFR	O15371	Eukaryotic translation initiation factor 3 subunit D OS=Homo sapiens OX=9606 GN=EIF3D PE=1 SV=1	9.6287	14.4021	14.7964	NA	13.7	13.2566	9.7401	NA	0.945129	0.749986
IAPQYYDMSNFPQCEAK	O43143	Pre-mRNA-splicing factor ATP-dependent RNA helicase DHX15 OS=Homo sapiens OX=9606 GN=DHX15 PE=1 SV=2	1.8225	2.1284	2.0088	1.4781	1.5359	2.5524	1.7312	NA	1.04323	0.8057
QYYIGDIHPSDLKPESGSKDPSKNDTCK	O43169	Cytochrome b5 type B OS=Homo sapiens OX=9606 GN=CYB5B PE=1 SV=2	1.7579	2.0829	1.6713	3.3852	1.7933	1.9962	3.6612	1.7293	1.03177	0.91108
CGEEIAVQFVDMVK	O43175	D-3-phosphoglycerate dehydrogenase OS=Homo sapiens OX=9606 GN=PHGDH PE=1 SV=4	NA	17.9397	14.6432	18.7872	NA	20.1104	23.7376	21.7092	1.27617	0.0450838
ALVDHENVISCPHLGASTK	O43175	D-3-phosphoglycerate dehydrogenase OS=Homo sapiens OX=9606 GN=PHGDH PE=1 SV=4	NA	8.7141	11.5683	11.7487	NA	5.3643	5.1635	5.9647	0.51489	0.00689244
QNLSKEELIAELQDCEGLIVR	O43175	D-3-phosphoglycerate dehydrogenase OS=Homo sapiens OX=9606 GN=PHGDH PE=1 SV=4	NA	9.9126	9.1645	4.7364	NA	5.2553	7.5222	8.2215	0.881811	0.638175
NAGNCLSPAVIVGLLK	O43175	D-3-phosphoglycerate dehydrogenase OS=Homo sapiens OX=9606 GN=PHGDH PE=1 SV=4	NA	32.7715	26.1636	29.1899	34.8699	24.814	22.4119	28.5503	0.94167	0.653055
VLISDSLDPCCR	O43175	D-3-phosphoglycerate dehydrogenase OS=Homo sapiens OX=9606 GN=PHGDH PE=1 SV=4	7.14847	13.5162	9.44899	11.6234	4.86875	3.81034	7.8185	3.44176	0.477737	0.018259
TPCNAGTFSQPEK	O43684	Mitotic checkpoint protein BUB3 OS=Homo sapiens OX=9606 GN=BUB3 PE=1 SV=1	NA	0.3662	0.2871	0.3023	NA	0.3049	0.7879	1.0397	2.23158	0.144839
CQLEINFNTLQTK	P12814; O43707	Alpha-actinin-4 OS=Homo sapiens OX=9606 GN=ACTN4 PE=1 SV=2	7.1498	3.8598	7.4502	6.9641	4.984	7.3337	4.3896	5.6876	0.88086	0.498791
AETAANRICK	P12814; O43707	Alpha-actinin-4 OS=Homo sapiens OX=9606 GN=ACTN4 PE=1 SV=2	NA	62.4272	29.9309	35.6667	NA	37.0893	15.6921	47.4427	0.782849	0.535857
ICDQWDALGSLTHSR	O43707	Alpha-actinin-4 OS=Homo sapiens OX=9606 GN=ACTN4 PE=1 SV=2	NA	16.8646	18.7928	23.7321	NA	20.8562	17.6691	18.9775	0.968231	0.793214
CPEDSRLTESVDVLMPNVGEIVGGSMR	O43776	Asparagine--tRNA ligase, cytoplasmic OS=Homo sapiens OX=9606 GN=NARS PE=1 SV=1	5.4116	6.0848	NA	5.1806	9.2761	7.6348	4.9024	3.1176	1.1212	0.698772
LMTDTINEPILLCRFPVEIK	O43776	Asparagine--tRNA ligase, cytoplasmic OS=Homo sapiens OX=9606 GN=NARS PE=1 SV=1	3.3253	3.8873	3.7457	1.8879	2.1432	3.9213	2.2127	2.2632	0.820507	0.393471
LNQVCATHQHFESR	O43795	Unconventional myosin-Ib OS=Homo sapiens OX=9606 GN=MYO1B PE=1 SV=3	1.2613	1.2354	1.5708	1.1988	0.8149	0.972	2.569	2.3501	1.27338	0.466859
SQKPEAGGCGAPAAR	O60343	TBC1 domain family member 4 OS=Homo sapiens OX=9606 GN=TBC1D4 PE=1 SV=2	0.1186	0.1237	0.0865	0.0801	NA	0.1016	0.1161	0.1112	1.07247	0.608192
GVEGTWVDICNNPAMEAEILK	O60488	Long-chain-fatty-acid--CoA ligase 4 OS=Homo sapiens OX=9606 GN=ACSL4 PE=1 SV=2	NA	1.6244	2.382	1.5286	1.9989	1.3979	1.797	1.5741	0.91706	0.600389
GVMMHHSNLIAGMTGQCER	O60488	Long-chain-fatty-acid--CoA ligase 4 OS=Homo sapiens OX=9606 GN=ACSL4 PE=1 SV=2	9.5404	11.6811	NA	10.0496	NA	8.8823	10.8719	10.8055	0.977251	0.808888
NCPLIDNICAFAK	O60488	Long-chain-fatty-acid--CoA ligase 4 OS=Homo sapiens OX=9606 GN=ACSL4 PE=1 SV=2	0.1627	0.1572	0.1637	0.195	0.1028	0.1108	0.1619	0.2024	0.851606	0.350143
WFCTGDIGEFHPDGCLQIIDR	O60488	Long-chain-fatty-acid--CoA ligase 4 OS=Homo sapiens OX=9606 GN=ACSL4 PE=1 SV=2	19.4596	NA	28.169	33.6919	70.4242	NA	30.2684	22.7127	1.51752	0.413163
GYDAPLCNLLLFK	O60488	Long-chain-fatty-acid--CoA ligase 4 OS=Homo sapiens OX=9606 GN=ACSL4 PE=1 SV=2	3.0923	1.3452	2.07336	1.697	2.67248	1.26524	1.48609	0.927158	0.773766	0.418961
SAFLCGVMK	O43390; O60506	Heterogeneous nuclear ribonucleoprotein Q OS=Homo sapiens OX=9606 GN=SYNCRIP PE=1 SV=2	8.0699	6.346	NA	6.8277	6.9056	5.4873	5.724	5.5971	0.837217	0.103588
LHYGDLTDSTCLVK	O60547	GDP-mannose 4,6 dehydratase OS=Homo sapiens OX=9606 GN=GMDS PE=1 SV=1	1.8656	3.0334	2.8327	3.0287	NA	3.9853	3.38	2.1772	1.18242	0.415961
VASMPLISSTCDMVSAAYASTK	O60664	Perilipin-3 OS=Homo sapiens OX=9606 GN=PLIN3 PE=1 SV=3	0.7659	0.4254	1.7072	1.457	0.5666	0.5095	1.6188	2.0984	1.10052	0.831848
TVCDAAEK	O60664	Perilipin-3 OS=Homo sapiens OX=9606 GN=PLIN3 PE=1 SV=3	NA	10.5568	8.794	10.2547	7.56234	7.6292	7.1732	8.19722	0.774232	0.00778951
AADLKYIEACAR	O60701	UDP-glucose 6-dehydrogenase OS=Homo sapiens OX=9606 GN=UGDH PE=1 SV=1	NA	2.4784	4.4256	4.2061	NA	4.7624	3.972	2.96	1.05259	0.821152
YQEAAPNVANNTGPHAASCFGAK	O60716	Catenin delta-1 OS=Homo sapiens OX=9606 GN=CTNND1 PE=1 SV=1	1.2935	1.3633	1.6548	1.3613	1.0533	1.6193	1.7027	1.9438	1.11391	0.460593
HIEWESVLTNTAGCLR	O60716	Catenin delta-1 OS=Homo sapiens OX=9606 GN=CTNND1 PE=1 SV=1	NA	1.3011	1.2325	1.2135	1.3451	1.2354	1.53	NA	1.09698	0.249484
TPAILEASAGAIQNLCAGR	O60716	Catenin delta-1 OS=Homo sapiens OX=9606 GN=CTNND1 PE=1 SV=1	1.6464	0.9213	NA	1.9489	1.8691	NA	1.7457	4.0988	1.70783	0.265141
TTHYTPLACGSNPLKR	O60832	H/ACA ribonucleoprotein complex subunit 4 OS=Homo sapiens OX=9606 GN=DKC1 PE=1 SV=3	1.3266	1.2615	1.4378	1.3071	1.3157	2.0474	2.2854	1.7341	1.38432	0.052848
MTVDESGQLISCSMDDTVR	O75083	WD repeat-containing protein 1 OS=Homo sapiens OX=9606 GN=WDR1 PE=1 SV=4	0.2734	0.7905	0.7749	1.1642	NA	0.6628	1.1367	0.9418	1.21714	0.535246
GPVTDVAYSHDGAFLAVCDASK	O75083	WD repeat-containing protein 1 OS=Homo sapiens OX=9606 GN=WDR1 PE=1 SV=4	0.7995	1.3379	1.4293	1.4174	0.9307	1.7947	1.347	1.5311	1.12428	0.535612
LATGSDDNCAAFFEGPPFK	O75083	WD repeat-containing protein 1 OS=Homo sapiens OX=9606 GN=WDR1 PE=1 SV=4	2.1511	4.2637	NA	4.5496	2.4443	7.8247	5.0449	6.7645	1.51023	0.27636
MDETGMVHCDTAVGTPDYISPEVLK	O75116	Rho-associated protein kinase 2 OS=Homo sapiens OX=9606 GN=ROCK2 PE=1 SV=4	4.4017	NA	4.4618	4.1237	NA	5.5778	2.8219	4.175	0.968238	0.872258
IATPFQVYSWTAPQAEHAMDCVR	O75153	Clustered mitochondria protein homolog OS=Homo sapiens OX=9606 GN=CLUH PE=1 SV=2	3.4243	3.0074	2.0657	5.6137	3.8464	4.1739	2.5636	3.7189	1.01359	0.955775
GLEMDPIDCTPPEYILPGSR	O75153	Clustered mitochondria protein homolog OS=Homo sapiens OX=9606 GN=CLUH PE=1 SV=2	1.3227	1.8954	2.0427	1.8128	1.0045	2.1632	1.6379	2.1401	0.981919	0.922187
MMIPDCQR	O75347	Tubulin-specific chaperone A OS=Homo sapiens OX=9606 GN=TBCA PE=1 SV=3	NA	27.7562	54.9669	26.3857	11.7308	29.4503	20.7902	17.8496	0.548679	0.125262
GSCSTEVEKETQEK	O75348	V-type proton ATPase subunit G 1 OS=Homo sapiens OX=9606 GN=ATP6V1G1 PE=1 SV=3	NA	9.0104	6.8747	7.8352	9.2345	NA	6.1245	5.692	0.887468	0.523787
ENKPSIIFIDEIDSLCGSR	O75351	Vacuolar protein sorting-associated protein 4B OS=Homo sapiens OX=9606 GN=VPS4B PE=1 SV=2	3.6595	1.6627	3.0851	2.5867	1.3476	1.0807	3.0701	1.1146	0.60151	0.136272
KVVPCLVTPVTGR	O75369	Filamin-B OS=Homo sapiens OX=9606 GN=FLNB PE=1 SV=2	2.3541	5.2097	9.9682	18.4064	2.5232	6.6796	3.1421	4.3891	0.46563	0.234063
GAGTGGLGLTVEGPCEAK	O75369	Filamin-B OS=Homo sapiens OX=9606 GN=FLNB PE=1 SV=2	NA	7.2483	9.6776	8.6623	NA	6.5296	10.341	7.5494	0.954346	0.78571
AGSNMLLIGVHGPTTPCEEVSMK	O75369	Filamin-B OS=Homo sapiens OX=9606 GN=FLNB PE=1 SV=2	10.0575	NA	9.3349	11.8412	8.1473	9.166	NA	10.2005	0.880904	0.262634
NGSCGVSYIAQEPGNYEVSIK	O75369	Filamin-B OS=Homo sapiens OX=9606 GN=FLNB PE=1 SV=2	0.3136	0.5661	1.0664	0.8081	NA	1.1361	1.1902	0.9579	1.58991	0.0977508
SSTETCYSAIPK	O75369	Filamin-B OS=Homo sapiens OX=9606 GN=FLNB PE=1 SV=2	12.9876	NA	36.1905	32.8433	11.4786	21.1359	20.7018	38.5459	0.839984	0.648255
VAVTEGCQPSR	O75369	Filamin-B OS=Homo sapiens OX=9606 GN=FLNB PE=1 SV=2	2.1776	3.6833	5.9181	5.1216	2.334	2.7796	5.6194	5.6544	0.969634	0.919408
SSFLVDCSK	O75369	Filamin-B OS=Homo sapiens OX=9606 GN=FLNB PE=1 SV=2	4.9278	NA	13.8357	9.1382	5.2315	7.7971	NA	9.4922	0.807148	0.563976
WLSDECTNAVVNFLSR	O75521	Enoyl-CoA delta isomerase 2, mitochondrial OS=Homo sapiens OX=9606 GN=ECI2 PE=1 SV=4	NA	2.7909	2.5995	2.732	2.3674	4.4259	1.7565	4.8874	1.24075	0.504331
LTAIDILTTCAADIQR	O75643	U5 small nuclear ribonucleoprotein 200 kDa helicase OS=Homo sapiens OX=9606 GN=SNRNP200 PE=1 SV=2	3.9345	5.8269	6.6746	5.5727	4.6973	5.8113	4.843	2.3191	0.802896	0.291347
AALETDENLLLCAPTGAGK	O75643	U5 small nuclear ribonucleoprotein 200 kDa helicase OS=Homo sapiens OX=9606 GN=SNRNP200 PE=1 SV=2	0.3636	0.3443	0.4331	NA	NA	0.2967	0.3255	0.2202	0.7383	0.0740404
TNVALMCMLR	O75643	U5 small nuclear ribonucleoprotein 200 kDa helicase OS=Homo sapiens OX=9606 GN=SNRNP200 PE=1 SV=2	0.3781	0.63	NA	0.563	0.5296	0.692	0.805	0.6807	1.29239	0.156554
ITNSLTVLCSEK	O75822	Eukaryotic translation initiation factor 3 subunit J OS=Homo sapiens OX=9606 GN=EIF3J PE=1 SV=2	2.2011	2.5966	2.9078	4.1733	3.1008	3.7303	2.2289	3.0235	1.01723	0.925655
GAQVNAVNQNGCTPLHYAASK	O75832	26S proteasome non-ATPase regulatory subunit 10 OS=Homo sapiens OX=9606 GN=PSMD10 PE=1 SV=1	2.3246	2.9483	1.0824	1.5387	2.9859	2.2066	2.2499	2.1777	1.21866	0.381755
CATITPDEK	O75874	Isocitrate dehydrogenase [NADP] cytoplasmic OS=Homo sapiens OX=9606 GN=IDH1 PE=1 SV=2	NA	3.09867	2.37972	2.60009	NA	14.0254	15.309	11.9416	5.10938	0.000385131
DLAACIK	O75874	Isocitrate dehydrogenase [NADP] cytoplasmic OS=Homo sapiens OX=9606 GN=IDH1 PE=1 SV=2	8.0627	7.5383	6.1929	6.5573	7.0232	8.7714	5.9833	6.3236	0.991193	0.936897
SEGGFIWACK	O75874	Isocitrate dehydrogenase [NADP] cytoplasmic OS=Homo sapiens OX=9606 GN=IDH1 PE=1 SV=2	17.3433	20.2679	23.5856	NA	21.4296	24.4204	NA	20.1229	#DIV/0!	0.510536
KLTHAAPCMLFMK	O76003	Glutaredoxin-3 OS=Homo sapiens OX=9606 GN=GLRX3 PE=1 SV=2	1.2822	1.0588	NA	0.8113	0.9483	0.8136	1.2004	NA	0.939727	0.73863
SGSCSAIR	O76021	Ribosomal L1 domain-containing protein 1 OS=Homo sapiens OX=9606 GN=RSL1D1 PE=1 SV=3	NA	9.1716	7.4268	9.228	4.2963	2.5707	4.369	5.4663	0.485036	0.00366335
AVDALLTHCK	O76021	Ribosomal L1 domain-containing protein 1 OS=Homo sapiens OX=9606 GN=RSL1D1 PE=1 SV=3	6.76635	6.03975	6.38873	5.77321	5.0822	7.62493	6.76177	8.14688	1.10604	0.383889
CAADVKAPLEVAQEH	O94903	Pyridoxal phosphate homeostasis protein OS=Homo sapiens OX=9606 GN=PLPBP PE=1 SV=1	1.8091	0.6373	NA	1.0716	2.0965	0.6733	0.398	1.1285	0.915925	0.858581
FSPDLWGVSVCTVDGQR	O94925	Glutaminase kidney isoform, mitochondrial OS=Homo sapiens OX=9606 GN=GLS PE=1 SV=1	NA	4.4368	5.0813	3.7464	NA	3.4621	5.413	3.6041	0.940797	0.740333
HSTGDTKVPFCLQSCVKPLK	O94925	Glutaminase kidney isoform, mitochondrial OS=Homo sapiens OX=9606 GN=GLS PE=1 SV=1	10.2609	8.7582	8.2219	8.0511	5.7031	7.378	7.8971	7.4164	0.80456	0.0476874
GIHFCHDLVSLCNFHNYDNLR	O94925	Glutaminase kidney isoform, mitochondrial OS=Homo sapiens OX=9606 GN=GLS PE=1 SV=1	NA	8.5016	9.8287	9.3978	NA	7.3625	7.1374	6.1264	0.743877	0.0122351
TQPPEDISCIAWNR	O94979	Protein transport protein Sec31A OS=Homo sapiens OX=9606 GN=SEC31A PE=1 SV=3	1.972	3.3493	2.8993	3.3963	5.4157	4.986	3.5608	2.3866	1.40735	0.173693
ELGGCSQAGNR	O95081	Arf-GAP domain and FG repeat-containing protein 2 OS=Homo sapiens OX=9606 GN=AGFG2 PE=1 SV=2	8.0918	6.7322	4.2159	5.017	9.6398	NA	4.6687	5.9137	1.1208	0.672231
RSECNMCNTPK	O95218	Zinc finger Ran-binding domain-containing protein 2 OS=Homo sapiens OX=9606 GN=ZRANB2 PE=1 SV=2	NA	16.2725	18.6959	13.0285	NA	10.1612	20.1039	11.8166	0.876759	0.601918
DYTGCSTSESLSPVK	O95297	Myelin protein zero-like protein 1 OS=Homo sapiens OX=9606 GN=MPZL1 PE=1 SV=1	6.4055	8.181	7.805	5.8768	NA	12.7436	15.0709	15.9824	2.06577	0.000773445
LCWFLDEAAAR	O95336	6-phosphogluconolactonase OS=Homo sapiens OX=9606 GN=PGLS PE=1 SV=2	0.3633	0.3371	0.3673	0.3647	0.3158	0.3949	0.3071	0.372	0.97026	0.652844
TYPGVMHSSCPQEMAAVKEFLEK	O95372	Acyl-protein thioesterase 2 OS=Homo sapiens OX=9606 GN=LYPLA2 PE=1 SV=1	4.7176	5.8135	6.4227	5.5571	6.7001	6.8567	6.1923	5.1829	1.10755	0.286355
DLAILQCHGELDPMVPVR	O95372	Acyl-protein thioesterase 2 OS=Homo sapiens OX=9606 GN=LYPLA2 PE=1 SV=1	4.7935	NA	3.2817	3.3115	7.1017	9.5737	4.9677	4.7716	1.73984	0.0996156
LVDPLGEMLAPSWEEHATCLANAEEQDMQR	O95394	Phosphoacetylglucosamine mutase OS=Homo sapiens OX=9606 GN=PGM3 PE=1 SV=1	2.3819	4.4784	3.7145	4.3323	3.3294	3.3929	4.4648	4.1935	1.03176	0.838593
SVNSLDGLASVLYPGCDTLDKVFTYAK	O95573	Long-chain-fatty-acid--CoA ligase 3 OS=Homo sapiens OX=9606 GN=ACSL3 PE=1 SV=3	1.1179	2.0332	1.8158	2.7366	1.3615	1.0919	2.0985	1.8524	0.831349	0.45235
LLLCGGAPLSATTQR	O95573	Long-chain-fatty-acid--CoA ligase 3 OS=Homo sapiens OX=9606 GN=ACSL3 PE=1 SV=3	11.4376	13.3247	15.561	NA	16.6364	NA	13.9102	16.8158	1.17457	0.197045
NTPLCDSFVFR	O95573	Long-chain-fatty-acid--CoA ligase 3 OS=Homo sapiens OX=9606 GN=ACSL3 PE=1 SV=3	NA	4.2033	3.1121	2.9525	NA	5.7048	2.9951	6.5695	1.4871	0.219482
VGAPLVCCEIK	O95573	Long-chain-fatty-acid--CoA ligase 3 OS=Homo sapiens OX=9606 GN=ACSL3 PE=1 SV=3	NA	23.0855	23.5597	15.982	NA	26.542	21.9954	24.7825	1.17074	0.269846
GCALQCAILSPAFK	O95757; P34932; Q92598	Heat shock 70 kDa protein 4L OS=Homo sapiens OX=9606 GN=HSPA4L PE=1 SV=3	1.2301	2.0063	2.2577	NA	0.7711	0.6066	1.2068	NA	0.470414	0.05332
TVYTFVGPPECVVEGALNAAR	O95954	Formimidoyltransferase-cyclodeaminase OS=Homo sapiens OX=9606 GN=FTCD PE=1 SV=2	0.5466	1.7194	NA	1.6804	4.2693	0.7462	0.3978	2.3497	1.47533	0.592808
LGVHPLSCHGWVLGEHGDSSVPVWSGMNVAGVSLK	P00338	L-lactate dehydrogenase A chain OS=Homo sapiens OX=9606 GN=LDHA PE=1 SV=2	0.8182	0.2689	0.1663	NA	NA	0.1281	0.0327	0.0406	0.160683	0.161816
LECGGGPWGNK	P00352	Retinal dehydrogenase 1 OS=Homo sapiens OX=9606 GN=ALDH1A1 PE=1 SV=2	NA	1.9367	1.8716	2.3254	NA	1.9576	1.6833	2.6484	1.02537	0.879161
AKPYEGSILEADCDILIPAASEK	P00367	Glutamate dehydrogenase 1, mitochondrial OS=Homo sapiens OX=9606 GN=GLUD1 PE=1 SV=2	0.2676	0.1691	0.3257	0.382	0.3296	0.2556	0.2268	0.2447	0.923366	0.680915
HVGDLGNVTADKDGVADVSIEDSVISLSGDHCIIGR	P00441	Superoxide dismutase [Cu-Zn] OS=Homo sapiens OX=9606 GN=SOD1 PE=1 SV=2	2.0927	2.6965	3.6891	3.9105	2.3727	3.1435	2.8525	3.6365	0.969037	0.854758
GLTEGLHGFHVHEFGDNTAGCTSAGPHFNPLSR	P00441	Superoxide dismutase [Cu-Zn] OS=Homo sapiens OX=9606 GN=SOD1 PE=1 SV=2	0.0373	0.0463	0.0421	0.0316	0.0288	0.0261	0.028	0.0385	0.771774	0.0769337
LACGVIGIAQ	P00441	Superoxide dismutase [Cu-Zn] OS=Homo sapiens OX=9606 GN=SOD1 PE=1 SV=2	0.0416	0.0537	0.064	0.0485	0.0418	0.0582	0.0831	0.071	1.22281	0.292275
TGQATVASGIPAGWMGLDCGPESSKK	P00558	Phosphoglycerate kinase 1 OS=Homo sapiens OX=9606 GN=PGK1 PE=1 SV=3	0.3099	0.8135	0.8566	0.9819	0.3642	0.9214	0.8557	0.9016	1.02735	0.922198
IKAAVPSIKFCLDNGAK	P00558	Phosphoglycerate kinase 1 OS=Homo sapiens OX=9606 GN=PGK1 PE=1 SV=3	NA	1.3232	1.3333	2.0939	0.9188	1.3472	1.5395	2.1648	0.9426	0.81737
TGQATVASGIPAGWMGLDCGPESSK	P00558	Phosphoglycerate kinase 1 OS=Homo sapiens OX=9606 GN=PGK1 PE=1 SV=3	NA	0.816185	0.8539	1.00535	NA	0.913972	0.851451	0.89064	0.992759	0.920284
ACANPAAGSVILLENLR	P00558	Phosphoglycerate kinase 1 OS=Homo sapiens OX=9606 GN=PGK1 PE=1 SV=3	0.0275	0.0285	0.0526	0.076	0.0288	0.037	0.0364	0.0336	0.735645	0.33606
FCLDNGAK	P00558	Phosphoglycerate kinase 1 OS=Homo sapiens OX=9606 GN=PGK1 PE=1 SV=3	0.0554	0.057	0.0684	0.0579	0.0235	0.057	0.0553	0.0569	0.807289	0.236662
DCVGPEVEK	P00558	Phosphoglycerate kinase 1 OS=Homo sapiens OX=9606 GN=PGK1 PE=1 SV=3	NA	0.121034	0.12883	0.145281	NA	0.0991015	0.135326	0.117404	0.890385	0.317959
LGMFNIQHCK	P01009	Alpha-1-antitrypsin OS=Homo sapiens OX=9606 GN=SERPINA1 PE=1 SV=3	NA	0.8312	0.2722	0.3969	0.3622	0.4339	0.3958	NA	0.794441	0.579453
MCPQLQQYEMHGPEGLR	P01023	Alpha-2-macroglobulin OS=Homo sapiens OX=9606 GN=A2M PE=1 SV=3	0.8816	0.9557	0.9118	0.8639	0.8137	0.6409	0.8067	0.7714	0.839386	0.0179092
YNILPEKEEFPFALGVQTLPQTCDEPK	P01023	Alpha-2-macroglobulin OS=Homo sapiens OX=9606 GN=A2M PE=1 SV=3	0.2772	0.2425	0.1619	0.1432	0.1702	0.1058	0.379	0.2063	1.04425	0.89547
LGADMEDVCGR	P02649	Apolipoprotein E OS=Homo sapiens OX=9606 GN=APOE PE=1 SV=1	1.1167	0.9587	0.9036	NA	0.6905	0.8969	0.4716	0.495	0.643001	0.0402903
DNCCILDER	P02679	Fibrinogen gamma chain OS=Homo sapiens OX=9606 GN=FGG PE=1 SV=3	3.4929	3.0945	4.1586	1.2488	3.4694	3.5606	3.7861	1.1509	0.997682	0.993935
FGSYCPTTCGIADFLSTYQTK	P02679	Fibrinogen gamma chain OS=Homo sapiens OX=9606 GN=FGG PE=1 SV=3	5.2053	5.7717	5.5493	3.0321	4.5276	3.0547	5.3938	5.3802	0.938538	0.731672
CDSSPDSAEDVR	P02765	Alpha-2-HS-glycoprotein OS=Homo sapiens OX=9606 GN=AHSG PE=1 SV=1	0.0804606	0.0911307	0.0453662	0.0645302	0.091784	0.0866929	0.0550558	NA	1.10618	0.644123
CNLLAEK	P02765	Alpha-2-HS-glycoprotein OS=Homo sapiens OX=9606 GN=AHSG PE=1 SV=1	0.1885	0.1247	0.0652	0.106	0.1277	0.1317	0.1163	0.1018	0.985756	0.950276
CCTESLVNR	P02768	Serum albumin OS=Homo sapiens OX=9606 GN=ALB PE=1 SV=2	0.0317	0.0502	0.0084	0.0094	0.0246	0.0377	0.0147	0.0084	0.85657	0.773305
YICENQDSISSK	P02768	Serum albumin OS=Homo sapiens OX=9606 GN=ALB PE=1 SV=2	0.0294	0.0337	0.0126	0.0153	0.0274	0.0291	0.0106	0.0139	0.89011	0.732678
QEPERNECFLQHKDDNPNLPR	P02768	Serum albumin OS=Homo sapiens OX=9606 GN=ALB PE=1 SV=2	0.0485	0.0224	0.0789	0.0308	0.0477	0.0938	0.057	0.0506	1.37929	0.337768
CASLQKFGER	P02768	Serum albumin OS=Homo sapiens OX=9606 GN=ALB PE=1 SV=2	0.3114	0.2162	0.4023	0.384	0.1904	0.1654	0.4631	0.1499	0.737347	0.350884
LVRPEVDVMCTAFHDNEETFLKK	P02768	Serum albumin OS=Homo sapiens OX=9606 GN=ALB PE=1 SV=2	0.0525	0.0903	0.137	0.1451	0.2909	0.2004	0.0708	0.1635	1.7077	0.186537
AACLLPK	P02768	Serum albumin OS=Homo sapiens OX=9606 GN=ALB PE=1 SV=2	0.3493	0.5541	0.5153	0.5722	0.5905	0.6895	0.5005	0.6388	1.21518	0.14976
SHCIAEVENDEMPADLPSLAADFVESKDVCK	P02768	Serum albumin OS=Homo sapiens OX=9606 GN=ALB PE=1 SV=2	0.2821	0.2152	0.2245	0.1968	0.2867	0.1828	0.6782	0.3126	1.5897	0.262907
AAFTECCQAADK	P02768	Serum albumin OS=Homo sapiens OX=9606 GN=ALB PE=1 SV=2	NA	0.0902961	0.0773719	0.105453	0.0842964	NA	0.0827355	0.0998708	0.977232	0.842613
GQCIIHAENDEKPEGLSPNLNR	P02771	Alpha-fetoprotein OS=Homo sapiens OX=9606 GN=AFP PE=1 SV=1	0.2071	0.1446	0.1569	0.1636	0.159	0.1734	0.179	NA	1.01438	0.891518
AENAVECFQTK	P02771	Alpha-fetoprotein OS=Homo sapiens OX=9606 GN=AFP PE=1 SV=1	0.1791	0.2878	0.2386	0.2413	0.1219	0.1772	0.1849	0.183	0.704478	0.0405165
FDEFFSEGCAPGSK	P02787	Serotransferrin OS=Homo sapiens OX=9606 GN=TF PE=1 SV=3	1.0228	1.6204	0.6854	0.867	0.5917	0.1964	1.5601	1.6651	0.95655	0.916019
KPVEEYANCHLAR	P02787	Serotransferrin OS=Homo sapiens OX=9606 GN=TF PE=1 SV=3	0.7152	0.8225	0.865	0.7179	0.5112	0.3443	0.5808	0.4966	0.6194	0.00315515
SAGWNIPIGLLYCDLPEPR	P02787	Serotransferrin OS=Homo sapiens OX=9606 GN=TF PE=1 SV=3	0.3211	0.2354	0.2765	0.3022	0.2836	0.2604	0.2849	0.3052	0.999031	0.989822
KPVDEYKDCHLAQVPSHTVVAR	P02787	Serotransferrin OS=Homo sapiens OX=9606 GN=TF PE=1 SV=3	0.1118	0.1507	0.0836	0.0589	0.1578	0.1483	0.1039	0.0836	1.21877	0.435315
DKEACVHK	P02787	Serotransferrin OS=Homo sapiens OX=9606 GN=TF PE=1 SV=3	1.6021	1.97615	0.580655	0.530009	1.50767	1.95183	NA	1.52667	1.41786	0.324
LGPNYLHIPVNCPYR	P04040	Catalase OS=Homo sapiens OX=9606 GN=CAT PE=1 SV=3	19.0055	22.7863	18.5416	21.6964	18.0342	16.442	24.772	18.7567	0.950934	0.647735
ALANSLACQGK	P04075	Fructose-bisphosphate aldolase A OS=Homo sapiens OX=9606 GN=ALDOA PE=1 SV=2	NA	9.6561	4.209	4.44479	5.62238	NA	2.28822	2.02703	0.542746	0.258644
CPLLKPWALTFSYGR	P04075	Fructose-bisphosphate aldolase A OS=Homo sapiens OX=9606 GN=ALDOA PE=1 SV=2	3.5053	3.3499	4.663	3.2352	7.9836	6.3732	4.8154	5.8956	1.69912	0.0127968
ALSDHHIYLEGTLLKPNMVTPGHACTQK	P04075	Fructose-bisphosphate aldolase A OS=Homo sapiens OX=9606 GN=ALDOA PE=1 SV=2	4.3603	3.2605	3.3601	3.8489	3.5115	1.54	3.5919	2.884	0.777313	0.175496
LTTPTYGDLNHLVSATMSGVTTCLR	Q13885; P04350; P07437; P68371; Q9BVA1	Tubulin beta-4A chain OS=Homo sapiens OX=9606 GN=TUBB4A PE=1 SV=2	6.69317	6.63984	5.9633	6.19651	5.80041	6.28446	6.08195	6.78066	#DIV/0!	0.633571
ALTVPELTQQMFDAKNMMAACDPR	Q13509; P04350; P68371	Tubulin beta-4A chain OS=Homo sapiens OX=9606 GN=TUBB4A PE=1 SV=2	NA	2.3272	1.395	1.9085	2.2187	2.998	NA	3.4446	1.54	0.0873177
NMMAACDPR	Q13885; Q13509; P04350; Q9BUF5; P07437; P68371; Q9BVA1	Tubulin beta-8 chain OS=Homo sapiens OX=9606 GN=TUBB8 PE=1 SV=2	110.554	113.223	118.933	114	95.9894	95.1679	90.9966	86.7721	0.807791	0.000206368
VPTANVSVVDLTCR	P04406	Glyceraldehyde-3-phosphate dehydrogenase OS=Homo sapiens OX=9606 GN=GAPDH PE=1 SV=3	0.0989464	0.0980845	NA	0.174134	0.179577	0.128486	0.2028	0.134302	1.30366	0.264759
CAQGCVCK	P04732	Metallothionein-1E OS=Homo sapiens OX=9606 GN=MT1E PE=1 SV=1	2.691	NA	4.5834	3.7915	2.0249	3.9621	2.2902	3.3406	0.787405	0.316908
VACITEQVLTLVNKR	P04843	Dolichyl-diphosphooligosaccharide--protein glycosyltransferase subunit 1 OS=Homo sapiens OX=9606 GN=RPN1 PE=1 SV=1	9.17952	8.47448	7.75221	9.98247	10.4048	7.44938	NA	8.86784	1.0068	0.949885
LKTEGSDLCDR	P04843	Dolichyl-diphosphooligosaccharide--protein glycosyltransferase subunit 1 OS=Homo sapiens OX=9606 GN=RPN1 PE=1 SV=1	0.524747	0.499248	0.565632	0.631978	0.523309	0.406808	0.537224	0.468945	0.871571	0.136122
IISANGCK	P05023	Sodium/potassium-transporting ATPase subunit alpha-1 OS=Homo sapiens OX=9606 GN=ATP1A1 PE=1 SV=1	0.348044	0.432293	0.594525	0.557818	0.390442	0.459097	0.624953	0.577443	1.0617	0.716242
CIELCCGSVK	P05023	Sodium/potassium-transporting ATPase subunit alpha-1 OS=Homo sapiens OX=9606 GN=ATP1A1 PE=1 SV=1	4.645	5.1603	12.7965	12.2572	8.4303	4.9092	8.5396	14.5071	1.04381	0.901967
TFPTVNPSTGEVICQVAEGDKEDVDKAVK	P05091	Aldehyde dehydrogenase, mitochondrial OS=Homo sapiens OX=9606 GN=ALDH2 PE=1 SV=2	3.85855	4.0088	4.00749	4.018	3.32606	4.52556	4.0871	5.29262	1.08422	0.448802
LLCGGGIAADR	P05091	Aldehyde dehydrogenase, mitochondrial OS=Homo sapiens OX=9606 GN=ALDH2 PE=1 SV=2	1.4515	1.6492	1.8491	1.8052	1.6768	1.8464	1.6479	1.7342	1.02225	0.720258
KGTDIMYTGTLDCWR	P05141	ADP/ATP translocase 2 OS=Homo sapiens OX=9606 GN=SLC25A5 PE=1 SV=7	4.7645	4.0089	NA	4.979	2.9679	3.3525	4.4061	6.9742	0.965324	0.890324
GLGDCLVK	P12236; P05141	ADP/ATP translocase 2 OS=Homo sapiens OX=9606 GN=SLC25A5 PE=1 SV=7	NA	6.3926	4.4841	5.7713	5.4527	5.6891	4.3714	5.0911	0.928233	0.523091
MADEAVCVGPAPTSK	P05165	Propionyl-CoA carboxylase alpha chain, mitochondrial OS=Homo sapiens OX=9606 GN=PCCA PE=1 SV=4	4.6954	2.1303	NA	3.8563	1.9297	2.8116	3.9154	1.9757	0.746518	0.330742
ALANVNIGSLICNVGAGGPAPAAGAAPAGGPAPSTAAAPAEEK	P05386	60S acidic ribosomal protein P1 OS=Homo sapiens OX=9606 GN=RPLP1 PE=1 SV=1	2.7984	3.1283	2.2059	3.0008	3.6316	3.4143	2.8833	3.3909	1.19641	0.0787624
AGAIAPCEVTVPAQNTGLGPEK	P05388	60S acidic ribosomal protein P0 OS=Homo sapiens OX=9606 GN=RPLP0 PE=1 SV=1	4.41234	4.79679	6.37103	6.3089	3.83314	6.0294	5.89925	6.11362	0.999376	0.996499
AAQDFFSTCR	P06132	Uroporphyrinogen decarboxylase OS=Homo sapiens OX=9606 GN=UROD PE=1 SV=2	25.1179	23.3101	17.3403	16.9939	44.2475	49.5898	NA	52.252	2.35356	0.000295691
SPEACCELTLQPLRR	P06132	Uroporphyrinogen decarboxylase OS=Homo sapiens OX=9606 GN=UROD PE=1 SV=2	0.3548	0.4074	0.313	0.3502	0.5074	0.2516	0.3097	NA	0.999673	0.998711
SCNCLLLK	P06733	Alpha-enolase OS=Homo sapiens OX=9606 GN=ENO1 PE=1 SV=2	4.4239	3.4423	3.6754	4.4584	2.0349	3.5881	2.9746	3.9784	0.786	0.135478
SGETEDTFIADLVVGLCTGQIK	P13929; P09104; P06733	Alpha-enolase OS=Homo sapiens OX=9606 GN=ENO1 PE=1 SV=2	8.8072	4.2471	4.3346	6.1014	7.2772	9.0992	8.512	8.2255	1.40968	0.0779166
TGAPCRSER	P13929; P09104; P06733	Alpha-enolase OS=Homo sapiens OX=9606 GN=ENO1 PE=1 SV=2	NA	0.2035	0.3356	0.3472	NA	0.3307	0.1184	0.1119	0.632969	0.272943
MIPCDFLIPVQTQHPIRK	P06744	Glucose-6-phosphate isomerase	0.0146	0.0316	0.0507	0.1055	0.1737	0.0553	0.0681	0.1035	1.97925	0.1848
QAHILLDCGEDNVCKPK	P06756	Integrin alpha-V OS=Homo sapiens OX=9606 GN=ITGAV PE=1 SV=2	0.3899	NA	0.4024	0.5915	0.4488	0.5987	0.4926	0.7557	1.24429	0.299917
VIQNEFTVGEECELETMTGEK	P07148	Fatty acid-binding protein, liver OS=Homo sapiens OX=9606 GN=FABP1 PE=1 SV=1	4.5088	6.271	5.0903	4.9583	5.5071	7.1385	4.0302	6.3939	1.10761	0.4924
VIGSGCNLDSAR	P07195	L-lactate dehydrogenase B chain OS=Homo sapiens OX=9606 GN=LDHB PE=1 SV=2	NA	0.3906	0.5583	0.4685	NA	0.3524	0.3063	0.3896	0.739594	0.0853754
KEECPAVR	P07237	Protein disulfide-isomerase OS=Homo sapiens OX=9606 GN=P4HB PE=1 SV=3	5.3292	7.02561	7.48342	6.86436	6.55984	6.734	8.75406	NA	1.10091	0.442533
KNVFVEFYAPWCGHCK	P07237	Protein disulfide-isomerase OS=Homo sapiens OX=9606 GN=P4HB PE=1 SV=3	11.231	9.98428	8.57626	NA	4.1627	6.5312	4.77259	7.61885	0.581171	0.0146834
FYAPWCGHCK	Q8NBS9	Protein disulfide-isomerase A3	110.034	NA	99.681	102.554	55.148	119.373	58.0547	124.815	0.86	0.542446
TCCPVNWVEHER	P07306	Asialoglycoprotein receptor 1 OS=Homo sapiens OX=9606 GN=ASGR1 PE=1 SV=2	0.0739	0.1913	0.1424	0.1604	0.177	0.1394	0.2578	0.3307	1.59313	0.139063
SCYWFSR	P07306	Asialoglycoprotein receptor 1 OS=Homo sapiens OX=9606 GN=ASGR1 PE=1 SV=2	0.3608	0.3949	0.3343	0.201	0.2462	0.3034	0.2196	0.2994	0.82773	0.282839
AIGAVPLIQGEYMIPCEK	P07339	Cathepsin D OS=Homo sapiens OX=9606 GN=CTSD PE=1 SV=1	0.2042	0.2123	0.2415	0.196	0.194	0.2229	0.2616	0.2097	1.04005	0.642817
EGCEAIVDTGTSLMVGPVDEVR	P07339	Cathepsin D OS=Homo sapiens OX=9606 GN=CTSD PE=1 SV=1	0.871209	1.0462	1.21354	1.18926	0.60593	0.667019	1.14358	1.03649	0.799271	0.211081
LGVENCYFPMFVSQSALEK	P07814	Bifunctional glutamate/proline--tRNA ligase OS=Homo sapiens OX=9606 GN=EPRS PE=1 SV=5	2.0127	1.3612	0.9384	0.9233	0.0867	0.2704	0.4905	0.9306	0.339636	0.0330509
DLPIKLNQWCNVVR	P07814	Bifunctional glutamate/proline--tRNA ligase OS=Homo sapiens OX=9606 GN=EPRS PE=1 SV=5	0.579	0.6455	0.689	0.5847	0.3225	0.2853	0.5378	0.5577	0.681811	0.039155
ERPTPSLNNNCTTSEDSLVLYNR	P07814	Bifunctional glutamate/proline--tRNA ligase OS=Homo sapiens OX=9606 GN=EPRS PE=1 SV=5	0.3474	0.3496	0.4296	0.6975	0.235	0.311	0.4959	NA	0.761581	0.396904
SCQFVAVR	P07814	Bifunctional glutamate/proline--tRNA ligase OS=Homo sapiens OX=9606 GN=EPRS PE=1 SV=5	11.1234	NA	11.0473	12.1853	17.0971	9.5696	13.8943	9.7879	1.09913	0.620838
INEAVECLLSLK	P07814	Bifunctional glutamate/proline--tRNA ligase OS=Homo sapiens OX=9606 GN=EPRS PE=1 SV=5	NA	1.8876	3.9821	5.996	3.5344	2.9175	6.1055	4.7435	1.09354	0.786686
ICEPGYSPTYK	P07858	Cathepsin B OS=Homo sapiens OX=9606 GN=CTSB PE=1 SV=3	0.4095	0.4983	0.5015	0.3483	0.3742	0.5291	0.5141	0.4978	1.08967	0.471718
GQDHCGIESEVVAGIPR	P07858	Cathepsin B OS=Homo sapiens OX=9606 GN=CTSB PE=1 SV=3	1.36681	1.68846	1.51076	1.48024	1.24904	1.82201	1.51581	1.94053	1.07957	0.504535
YYTSASGDEMVSLKDYCTR	P07900	Heat shock protein HSP 90-alpha OS=Homo sapiens OX=9606 GN=HSP90AA1 PE=1 SV=5	3.9212	2.9621	4.314	4.1301	3.5417	4.3317	3.0659	3.8139	0.962538	0.732276
VFIMDNCEELIPEYLNFIR	P07900	Heat shock protein HSP 90-alpha OS=Homo sapiens OX=9606 GN=HSP90AA1 PE=1 SV=5	4.7375	5.4063	4.5688	5.553	5.393	7.1765	5.4661	6.4645	1.20895	0.0747109
LVTSPCCIVTSTYGWTANMER	P07900	Heat shock protein HSP 90-alpha OS=Homo sapiens OX=9606 GN=HSP90AA1 PE=1 SV=5	NA	2.6718	3.7047	3.3247	0.438	0.788	2.8634	2.0783	0.476825	0.0639342
LIVGLMRPPAYCDAK	P08133	Annexin A6 OS=Homo sapiens OX=9606 GN=ANXA6 PE=1 SV=3	2.292	3.0676	4.2901	3.8176	4.085	3.5012	3.1624	5.05	1.17311	0.370438
QRQEVCQSYK	P08133	Annexin A6 OS=Homo sapiens OX=9606 GN=ANXA6 PE=1 SV=3	10.5288	12.1153	13.0844	9.8757	9.5171	10.3215	12.4824	NA	0.944971	0.605694
HFCPNVPIILVGNK	P08134; P61586	Rho-related GTP-binding protein RhoC OS=Homo sapiens OX=9606 GN=RHOC PE=1 SV=1	NA	1.32524	1.53098	1.4751	NA	1.42232	1.27485	1.39255	0.944218	0.349906
AKFENLCK	P08238	Heat shock protein HSP 90-beta OS=Homo sapiens OX=9606 GN=HSP90AB1 PE=1 SV=4	2.25087	2.36133	2.61727	2.78238	2.18175	2.83419	3.6339	2.80709	1.14434	0.303501
LVSSPCCIVTSTYGWTANMER	P08238	Heat shock protein HSP 90-beta OS=Homo sapiens OX=9606 GN=HSP90AB1 PE=1 SV=4	NA	34.7829	50.3607	69.8215	NA	40.611	54.3387	47.0644	0.916426	0.711873
ALGATDCLNPR	P08319	Alcohol dehydrogenase 4 OS=Homo sapiens OX=9606 GN=ADH4 PE=1 SV=5	NA	2.318	4.4225	2.1202	NA	2.7992	6.4113	5.5279	1.66334	0.209994
GGVDFALDCAGGSETMK	P08319	Alcohol dehydrogenase 4 OS=Homo sapiens OX=9606 GN=ADH4 PE=1 SV=5	17.9352	11.8456	NA	8.109	2.6964	12.2618	10	3.3324	0.559991	0.1942
VIPLYAPLCR	P08319	Alcohol dehydrogenase 4 OS=Homo sapiens OX=9606 GN=ADH4 PE=1 SV=5	0.7666	0.7545	0.5872	NA	1.0276	2.1241	0.8273	0.5874	1.62444	0.327783
FCLSPLTNLCGK	P08319	Alcohol dehydrogenase 4 OS=Homo sapiens OX=9606 GN=ADH4 PE=1 SV=5	2.68785	3.02738	1.84315	NA	2.33385	3.7326	2.12932	1.23782	0.936073	0.821671
VCLLGCGFSTGYGAAINNAK	P08319	Alcohol dehydrogenase 4 OS=Homo sapiens OX=9606 GN=ADH4 PE=1 SV=5	0.0197	0.0151	0.0256	0.0309	0.0259	0.0627	0.0753	0.0599	2.45126	0.0245794
NFYGGNGIVGAQVPLGAGIALACK	P08559	Pyruvate dehydrogenase E1 component subunit alpha, somatic form, mitochondrial OS=Homo sapiens OX=9606 GN=PDHA1 PE=1 SV=3	9.1479	8.2542	10.6044	10.7077	4.5785	8.1653	NA	8.9105	0.745783	0.121551
VDGMDILCVR	P08559	Pyruvate dehydrogenase E1 component subunit alpha, somatic form, mitochondrial OS=Homo sapiens OX=9606 GN=PDHA1 PE=1 SV=3	NA	1.8565	2.2109	2.7265	1.3722	4.9182	1.7098	2.1951	1.12549	0.783187
LPCIFICENNR	P08559	Pyruvate dehydrogenase E1 component subunit alpha, somatic form, mitochondrial OS=Homo sapiens OX=9606 GN=PDHA1 PE=1 SV=3	0.1173	0.1682	0.161	0.1648	0.0823	0.1392	0.1885	0.1358	0.892851	0.532984
HHNQPYCGIAPYIR	P08621	U1 small nuclear ribonucleoprotein 70 kDa OS=Homo sapiens OX=9606 GN=SNRNP70 PE=1 SV=2	NA	6.5556	6.4093	6.926	6.6269	5.6999	4.7524	6.0135	0.870726	0.134285
VCEEIAIIPSKK	P08708	40S ribosomal protein S17 OS=Homo sapiens OX=9606 GN=RPS17 PE=1 SV=2	0.2324	0.1841	0.2714	0.3561	0.4056	0.4392	0.2126	0.1514	1.15785	0.623444
ADHQPLTEASYVNLPTIALCNTDSPLR	P08865	40S ribosomal protein SA OS=Homo sapiens OX=9606 GN=RPSA PE=1 SV=4	0.0188	0.0146	0.0414	0.0493	0.0244	0.0103	0.0341	0.0311	0.804996	0.566918
YVDIAIPCNNK	P08865	40S ribosomal protein SA OS=Homo sapiens OX=9606 GN=RPSA PE=1 SV=4	0.1565	0.3052	0.0986	0.4155	0.7658	0.3277	0.1767	0.3381	1.64819	0.319404
QCSSGLQAVASIAGGIR	P09110	3-ketoacyl-CoA thiolase, peroxisomal OS=Homo sapiens OX=9606 GN=ACAA1 PE=1 SV=2	3.1953	3.3887	3.2618	3.5797	2.9877	4.0561	6.9756	2.6403	1.2409	0.444316
GCSGDEREMAK	P09327	Villin-1 OS=Homo sapiens OX=9606 GN=VIL1 PE=1 SV=4	NA	9.1524	8.6324	7.5151	1.3341	6.0909	1.7112	4.486	0.403822	0.0159358
LFECSNKTGR	P09327	Villin-1 OS=Homo sapiens OX=9606 GN=VIL1 PE=1 SV=4	0.4254	0.5351	0.5057	0.6258	0.6058	0.5582	0.3312	0.5564	0.980688	0.896227
FNAHGDANTIVCNSK	P09382	Galectin-1 OS=Homo sapiens OX=9606 GN=LGALS1 PE=1 SV=2	0.3714	0.4306	0.3324	0.2286	0.3397	0.5357	0.3013	0.3604	1.12773	0.540583
GAVHQLCQSLAGK	P09417	Dihydropteridine reductase OS=Homo sapiens OX=9606 GN=QDPR PE=1 SV=2	0.0554	0.0932	0.0467	0.1189	0.0167	0.0427	0.0532	0.0838	0.62508	0.225505
RPPSAFFLFCSEYRPK	P09429	High mobility group protein B1 OS=Homo sapiens OX=9606 GN=HMGB1 PE=1 SV=3	3.0873	4.7105	12.5307	5.5784	4.3053	6.406	5.0493	6.6142	0.863662	0.696199
GCGEQTMIYLAPTLAASR	P0C0L4; P0C0L5	Complement C4-A OS=Homo sapiens OX=9606 GN=C4A PE=1 SV=2	NA	2.038	3.132	3.4139	1.7293	1.4226	2.061	2.0994	0.638897	0.0485234
CSVFYGAPSK	P0C0L4; P0C0L5	Complement C4-A OS=Homo sapiens OX=9606 GN=C4A PE=1 SV=2	0.1329	0.1688	0.1029	0.1547	0.1292	0.2783	0.1938	0.1036	1.26033	0.414367
ELEQVCNPIISGLYQGAGGPGPGGFGAQGPK	P0DMV8	Heat shock 70 kDa protein 1A OS=Homo sapiens OX=9606 GN=HSPA1A PE=1 SV=1	2.5422	2.6249	3.9302	4.1123	5.1525	3.1837	3.3651	2.9193	1.10682	0.610548
FEELCSDLFR	P0DMV8	Heat shock 70 kDa protein 1A OS=Homo sapiens OX=9606 GN=HSPA1A PE=1 SV=1	0.272215	0.372093	0.435668	0.637291	0.297015	0.538985	0.398542	0.574141	1.05323	0.827247
CMPTFQFFK	P10599	Thioredoxin OS=Homo sapiens OX=9606 GN=TXN PE=1 SV=3	32.4813	36.2673	38.59	34.9626	29.4345	32.9776	25.6793	28.3848	0.818519	0.0171056
CNFYDNKDLECVTNLQEVAR	P10619	Lysosomal protective protein OS=Homo sapiens OX=9606 GN=CTSA PE=1 SV=2	0.0692	0.069	0.056	0.0356	0.0485	0.022	0.0667	0.059	0.853786	0.528557
VFEHDSVELNCK	P10768	S-formylglutathione hydrolase OS=Homo sapiens OX=9606 GN=ESD PE=1 SV=2	NA	5.7343	7.2235	10.4673	NA	5.1904	7.6629	6.6321	0.831817	0.450087
SVSAFAPICNPVLCPWGK	P10768	S-formylglutathione hydrolase OS=Homo sapiens OX=9606 GN=ESD PE=1 SV=2	NA	36.9392	27.307	30.3846	17.1684	40.884	37.4143	18.88	0.906259	0.715151
CIPALDSLTPANEDQK	P10809	60 kDa heat shock protein, mitochondrial OS=Homo sapiens OX=9606 GN=HSPD1 PE=1 SV=2	0.848226	NA	0.628905	0.939845	NA	0.128147	0.179064	0.206529	0.212555	0.00262041
CEFQDAYVLLSEK	P10809	60 kDa heat shock protein, mitochondrial OS=Homo sapiens OX=9606 GN=HSPD1 PE=1 SV=2	0.925237	NA	0.694347	0.935762	NA	0.509723	0.409207	0.377071	0.507173	0.00895444
AAVEEGIVLGGGCALLR	P10809	60 kDa heat shock protein, mitochondrial OS=Homo sapiens OX=9606 GN=HSPD1 PE=1 SV=2	32.0296	32.1322	33.6538	31.0718	30.7621	29.6281	30.5273	28.5187	0.926671	0.0185293
LLKFPLGPCPR	P11117	Lysosomal acid phosphatase OS=Homo sapiens OX=9606 GN=ACP2 PE=1 SV=3	2.6849	2.8366	3.4213	7.1507	3.7931	3.635	2.1188	2.4297	0.744189	0.399715
EGVECEVINMR	P11177	Pyruvate dehydrogenase E1 component subunit beta, mitochondrial OS=Homo sapiens OX=9606 GN=PDHB PE=1 SV=3	NA	3.4838	2.9411	2.2865	NA	2.5702	3.8265	1.7369	0.933673	0.796562
GPNGASAGVAAQHSQCFAAWYGHCPGLK	P11177	Pyruvate dehydrogenase E1 component subunit beta, mitochondrial OS=Homo sapiens OX=9606 GN=PDHB PE=1 SV=3	1.0027	1.3011	1.4844	5.0661	NA	0.6044	13.3355	13.1099	4.07332	0.125109
CNAEEHVR	P11279	Lysosome-associated membrane glycoprotein 1 OS=Homo sapiens OX=9606 GN=LAMP1 PE=1 SV=3	0.0712	0.043	0.0266	0.0317	0.0511	0.0457	0.0501	0.041	1.08928	0.719621
NIHESCMSQIGWNR	P11413	Glucose-6-phosphate 1-dehydrogenase	0.4618	0.339	0.3957	0.4131	0.2796	0.2644	0.2677	0.2546	0.662463	0.0019164
LQFHDVAGDIFHQQCK	P11413	Glucose-6-phosphate 1-dehydrogenase OS=Homo sapiens OX=9606 GN=G6PD PE=1 SV=4	NA	11.6456	11.5156	12.9653	NA	12.0664	13.8473	11.85	1.04532	0.524771
LILDVFCGSQMHFVR	P11413	Glucose-6-phosphate 1-dehydrogenase OS=Homo sapiens OX=9606 GN=G6PD PE=1 SV=4	NA	8.6432	6.5766	5.8257	NA	6.9473	6.8465	5.3805	0.911088	0.560154
CISEVQANNVVLGQYVGNPDGEGEATK	P11413	Glucose-6-phosphate 1-dehydrogenase OS=Homo sapiens OX=9606 GN=G6PD PE=1 SV=4	0.1632	0.1782	NA	0.2811	0.0753	0.0897	NA	0.1177	0.454137	0.0442212
GLYAAFDCTATMK	P11498	Pyruvate carboxylase, mitochondrial OS=Homo sapiens OX=9606 GN=PC PE=1 SV=2	NA	4.0881	4.1125	3.4076	5.3854	5.9428	2.9118	2.5525	1.08496	0.763052
GCLELIKETGVPIAGR	P11586	C-1-tetrahydrofolate synthase, cytoplasmic OS=Homo sapiens OX=9606 GN=MTHFD1 PE=1 SV=3	4.5593	2.9938	4.2628	2.9751	1.5625	2.9275	3.2252	3.0237	0.726043	0.122106
SCKPKPIGK	P11586	C-1-tetrahydrofolate synthase, cytoplasmic OS=Homo sapiens OX=9606 GN=MTHFD1 PE=1 SV=3	NA	97.145	133.426	364.283	NA	116.415	83.3146	101.67	0.506678	0.309957
GDLNDCFIPCTPK	P11586	C-1-tetrahydrofolate synthase, cytoplasmic OS=Homo sapiens OX=9606 GN=MTHFD1 PE=1 SV=3	NA	1.6335	2.7703	2.72	NA	1.1002	1.9501	3.4855	0.91746	0.81636
FVCNDDVYSGPLK	P11717	Cation-independent mannose-6-phosphate receptor OS=Homo sapiens OX=9606 GN=IGF2R PE=1 SV=3	4.1703	1.8219	2.5477	NA	1.7754	2.3196	NA	1.1976	0.61975	0.230538
ATLITFLCDR	P11717	Cation-independent mannose-6-phosphate receptor OS=Homo sapiens OX=9606 GN=IGF2R PE=1 SV=3	0.4833	0.4165	NA	0.1936	0.0678	0.1462	0.0812	0.1652	0.315804	0.0246877
AGDTVIPLYIPQCGECK	P11766	Alcohol dehydrogenase class-3 OS=Homo sapiens OX=9606 GN=ADH5 PE=1 SV=4	0.346555	0.381267	0.416106	0.393175	0.445377	0.366975	0.412751	0.431401	1.07768	0.23115
GFGFVCFSSPEEATK	Q13310; P11940	Polyadenylate-binding protein 1 OS=Homo sapiens OX=9606 GN=PABPC1 PE=1 SV=2	NA	1.53845	1.83759	1.51539	0.952417	2.60496	1.63397	2.14088	1.4494	0.655949
CAGNEDIITLR	P12004	Proliferating cell nuclear antigen OS=Homo sapiens OX=9606 GN=PCNA PE=1 SV=1	NA	2.0581	1.6844	2.0466	NA	1.7208	2.5329	2.1887	1.11285	0.458003
DLSHIGDAVVISCAK	P12004	Proliferating cell nuclear antigen OS=Homo sapiens OX=9606 GN=PCNA PE=1 SV=1	NA	1.07555	0.816093	1.45676	NA	0.810386	0.99322	1.07664	0.860184	0.482878
ICRDLSHIGDAVVISCAK	P12004	Proliferating cell nuclear antigen OS=Homo sapiens OX=9606 GN=PCNA PE=1 SV=1	2.4001	3.195	3.4017	3.1219	1.3644	NA	3.1126	2.841	0.805147	0.309873
LMDLDVEQLGIPEQEYSCVVK	P12004	Proliferating cell nuclear antigen OS=Homo sapiens OX=9606 GN=PCNA PE=1 SV=1	1.3907	2.8572	2.8009	3.3017	NA	3.15	3.1022	3.1163	1.20683	0.324943
HGFCGIPITDTGR	P12268	Inosine-5'-monophosphate dehydrogenase 2 OS=Homo sapiens OX=9606 GN=IMPDH2 PE=1 SV=2	1.0376	2.888	1.0843	1.6632	NA	0.9095	0.6172	0.7571	0.45632	0.13823
VGMGSGSICITQEVLACGRPQATAVYK	P12268	Inosine-5'-monophosphate dehydrogenase 2 OS=Homo sapiens OX=9606 GN=IMPDH2 PE=1 SV=2	NA	11.9442	13.5421	8.7005	40.8514	NA	29.3739	28.2155	2.8795	0.00744919
LFQCLLHR	P13010	X-ray repair cross-complementing protein 5 OS=Homo sapiens OX=9606 GN=XRCC5 PE=1 SV=3	0.1393	0.0551	0.0401	0.043	0.071	0.1099	0.1358	0.0365	1.27279	0.576789
LGDVGMAELCPGLLHPSSR	P13489	Ribonuclease inhibitor OS=Homo sapiens OX=9606 GN=RNH1 PE=1 SV=2	6.145	8.2948	14.4898	13.1871	9.4607	NA	12.0432	11.4343	1.04276	0.860287
ELCQGLGQPGSVLR	P13489	Ribonuclease inhibitor OS=Homo sapiens OX=9606 GN=RNH1 PE=1 SV=2	1.0357	2.4314	2.5121	3.7946	1.0628	1.4716	2.1397	2.277	0.711197	0.306788
SNELGDVGVHCVLQGLQTPSCK	P13489	Ribonuclease inhibitor OS=Homo sapiens OX=9606 GN=RNH1 PE=1 SV=2	1.6409	NA	5.9346	3.0204	3.0314	4.1278	6.9679	7.6883	1.54414	0.307361
SNTGGQAFPQCVFDHWQILPGDPFDNSSRPSQVVAETR	P13639	Elongation factor 2 OS=Homo sapiens OX=9606 GN=EEF2 PE=1 SV=4	2.2304	2.371	2.557	2.5125	2.0515	2.0774	2.9825	2.9302	1.03833	0.74143
CELLYEGPPDDEAAMGIK	P13639	Elongation factor 2 OS=Homo sapiens OX=9606 GN=EEF2 PE=1 SV=4	2.7238	2.5672	3.5978	4.67303	2.474	3.84079	2.7222	2.72263	0.867112	0.461254
STLTDSLVCK	P13639	Elongation factor 2 OS=Homo sapiens OX=9606 GN=EEF2 PE=1 SV=4	2.36755	2.63656	2.19504	2.4198	1.58294	1.14776	2.38547	2.11804	0.75208	0.0863105
IWCFGPDGTGPNILTDITK	P13639	Elongation factor 2 OS=Homo sapiens OX=9606 GN=EEF2 PE=1 SV=4	5.419	6.65391	NA	6.85757	6.42492	3.35549	NA	5.6614	0.815711	0.320469
DLEEDHACIPIKK	P13639	Elongation factor 2 OS=Homo sapiens OX=9606 GN=EEF2 PE=1 SV=4	NA	3.649	2.3687	3.156	6.5111	2.5283	5.0365	5.1665	1.57317	0.149899
TFDSIVMDPKKDVLIEFYAPWCGHCK	P13667	Protein disulfide-isomerase A4 OS=Homo sapiens OX=9606 GN=PDIA4 PE=1 SV=2	NA	21.7753	14.4121	14.7248	NA	20.4711	15.5074	20.0054	1.1	0.588509
HAACPVLVGNK	P13674	Prolyl 4-hydroxylase subunit alpha-1 OS=Homo sapiens OX=9606 GN=P4HA1 PE=1 SV=2	0.5779	0.6339	0.6587	0.2667	0.7444	0.7432	0.3576	0.4037	1.05226	0.847413
QPALSAACLGPEVTTQYGGQYR	P13798	Acylamino-acid-releasing enzyme OS=Homo sapiens OX=9606 GN=APEH PE=1 SV=4	5.2328	6.1906	3.2982	6.9329	5.7	4.9218	3.2776	5.8184	0.910564	0.638937
TIYAGNALCTVK	P13804	Electron transfer flavoprotein subunit alpha, mitochondrial OS=Homo sapiens OX=9606 GN=ETFA PE=1 SV=1	1.107	1.2875	1.727	1.898	2.0123	1.8548	1.1774	1.745	1.12792	0.485686
FEHCNFNDVTTR	P13987	CD59 glycoprotein OS=Homo sapiens OX=9606 GN=CD59 PE=1 SV=1	0.0376	0.0481	0.0254	0.0235	0.0681	0.0267	0.0286	0.0129	1.01263	0.97533
YEQGTGCWQGPNR	P14314	Glucosidase 2 subunit beta OS=Homo sapiens OX=9606 GN=PRKCSH PE=1 SV=2	0.1239	0.2193	0.271	0.1492	0.1984	0.298	0.1821	0.1641	1.10375	0.6748
IGTDIQDNKCSWLVVQCLQR	P14324	Farnesyl pyrophosphate synthase OS=Homo sapiens OX=9606 GN=FDPS PE=1 SV=4	NA	12.4491	11.5511	8.208	NA	6.9419	7.4515	7.9844	0.694786	0.0687177
NADGTICYDSTHYKETWK	P14550	Alcohol dehydrogenase [NADP(+)] OS=Homo sapiens OX=9606 GN=AKR1A1 PE=1 SV=3	1.1778	3.9981	2.4729	1.3592	NA	2.4771	2.9037	2.3335	1.14184	0.699367
AEGSDVANAVLDGADCIMLSGETAK	P14618	Pyruvate kinase PKM OS=Homo sapiens OX=9606 GN=PKM PE=1 SV=4	1.0953	2.0879	2.5769	1.7524	0.7045	1.8225	2.3949	2.1568	0.942256	0.830961
NTGIICTIGPASR	P14618	Pyruvate kinase PKM OS=Homo sapiens OX=9606 GN=PKM PE=1 SV=4	0.3834	1.058	1.1959	0.8878	0.2955	0.8499	1.0434	0.9369	0.886698	0.696051
CDENILWLDYK	P14618	Pyruvate kinase PKM OS=Homo sapiens OX=9606 GN=PKM PE=1 SV=4	1.89586	2.30499	2.61197	2.37139	1.1668	1.66184	NA	2.11026	0.972397	0.0737393
ITLDNAYMEKCDENILWLDYK	P14618	Pyruvate kinase PKM OS=Homo sapiens OX=9606 GN=PKM PE=1 SV=4	1.311	2.7539	2.5112	1.9698	1.1636	1.9435	1.8613	2.0735	0.824009	0.360116
KPRPTRAEGSDVANAVLDGADCIMLSGETAK	P14618	Pyruvate kinase PKM OS=Homo sapiens OX=9606 GN=PKM PE=1 SV=4	1.0892	1.8469	1.8445	1.5734	NA	1.6109	2.0263	2.3933	1.26545	0.196911
AGKPVICATQMLESMIKKPRPTR	P14618	Pyruvate kinase PKM OS=Homo sapiens OX=9606 GN=PKM PE=1 SV=4	NA	3.4989	3.7641	4.0067	NA	2.4957	4.5644	3.0109	0.893635	0.565566
GIFPVLCK	P14618	Pyruvate kinase PKM OS=Homo sapiens OX=9606 GN=PKM PE=1 SV=4	NA	2.60197	2.04095	1.71577	NA	2.01214	3.33491	1.55496	1.08545	0.775341
AGKPVICATQMLESMIK	P14618	Pyruvate kinase PKM OS=Homo sapiens OX=9606 GN=PKM PE=1 SV=4	NA	4.0467	3.7363	3.4528	NA	3.8026	4.4832	3.5247	1.05115	0.59526
AEGSDVANAVLDGADCIMLSGETAKGDYPLEAVR	P14618	Pyruvate kinase PKM OS=Homo sapiens OX=9606 GN=PKM PE=1 SV=4	NA	1.5783	1.7	1.2844	NA	1.3229	1.5795	1.5084	0.966708	0.744797
CCSGAIIVLTK	P14618	Pyruvate kinase PKM OS=Homo sapiens OX=9606 GN=PKM PE=1 SV=4	26.2645	27.9461	29.3764	26.8909	22.7093	23.7167	29.0901	28.8445	0.717013	0.429972
LTESPCALVASQYGWSGNMER	P14625	Endoplasmin OS=Homo sapiens OX=9606 GN=HSP90B1 PE=1 SV=1	0.2377	0.3767	0.7471	0.8476	0.1772	0.2116	0.4471	0.4811	0.59617	0.226562
QPAIMPGQSYGLEDGSCSYKDFSESR	P14866	Heterogeneous nuclear ribonucleoprotein L OS=Homo sapiens OX=9606 GN=HNRNPL PE=1 SV=2	5.4536	5.6609	5.9571	3.3747	3.9239	4.9401	6.692	6.7943	1.09312	0.620973
LCFSTAQHAS	P14866	Heterogeneous nuclear ribonucleoprotein L OS=Homo sapiens OX=9606 GN=HNRNPL PE=1 SV=2	2.6548	15.638	7.4449	10.6591	4.8528	9.581	8.8217	13.0588	0.997733	0.995078
ASLNGADIYSGCCTLK	P14866	Heterogeneous nuclear ribonucleoprotein L OS=Homo sapiens OX=9606 GN=HNRNPL PE=1 SV=2	NA	1.2256	1.2346	1.3296	4.5817	4.8999	2.4411	5.6129	3.47029	0.0118579
LNVCVSK	Q8WVV9; P14866	Heterogeneous nuclear ribonucleoprotein L OS=Homo sapiens OX=9606 GN=HNRNPL PE=1 SV=2	1.3035	3.5835	3.4873	5.402	4.8864	8.5761	2.6393	6.1981	1.61871	0.204698
IGSCTQQDVELHVQK	P14868	Aspartate--tRNA ligase, cytoplasmic OS=Homo sapiens OX=9606 GN=DARS PE=1 SV=2	0.4921	0.8174	1.2052	1.0063	0.819	0.9064	0.8359	0.7949	0.953195	0.797462
LEYCEALAMLR	P14868	Aspartate--tRNA ligase, cytoplasmic OS=Homo sapiens OX=9606 GN=DARS PE=1 SV=2	13.9753	14.1069	NA	11.1858	6.4997	9.9926	NA	9.3241	0.657441	0.0352091
FVKQDQVCIAR	P15170; Q8IYD1	Eukaryotic peptide chain release factor GTP-binding subunit ERF3A OS=Homo sapiens OX=9606 GN=GSPT1 PE=1 SV=1	NA	0.7889	1.0017	1.0953	0.7366	0.8098	1.0627	0.8769	0.905957	0.456683
IELLHNIDPNFVDSSPCPR	P15848	Arylsulfatase B OS=Homo sapiens OX=9606 GN=ARSB PE=1 SV=1	2.0592	1.52	1.2064	1.1021	1.9398	2.1709	1.7796	1.0886	1.18534	0.422527
IGKPHTVPCK	P15880	40S ribosomal protein S2 OS=Homo sapiens OX=9606 GN=RPS2 PE=1 SV=2	0.2888	0.3043	0.2872	0.281	0.2293	0.5052	0.1756	0.2424	0.992422	0.977232
CGSVLVR	P15880	40S ribosomal protein S2 OS=Homo sapiens OX=9606 GN=RPS2 PE=1 SV=2	0.2199	0.385	0.2534	0.2001	0.1174	0.3955	0.1745	0.1808	0.820295	0.544164
YQAECSQFK	P15924	Desmoplakin OS=Homo sapiens OX=9606 GN=DSP PE=1 SV=3	1.4203	2.8583	4.1308	3.0927	2.8203	2.7578	4.9567	3.62	1.23063	0.414931
ACPRPEGLNFQDLKNQLK	P15927	Replication protein A 32 kDa subunit OS=Homo sapiens OX=9606 GN=RPA2 PE=1 SV=1	2.386	2.1244	2.0477	1.4651	3.8215	3.1288	NA	1.1494	1.34605	0.372039
ILLNACCPGWVR	P16152	Carbonyl reductase [NADPH] 1 OS=Homo sapiens OX=9606 GN=CBR1 PE=1 SV=3	NA	2.668	2.2243	2.7582	NA	4.3776	5.0382	3.1374	1.64083	0.0481966
QAWVTPFTSGDKIGCFALSEPGNGSDAGAASTTAR	P16219	Short-chain specific acyl-CoA dehydrogenase, mitochondrial OS=Homo sapiens OX=9606 GN=ACADS PE=1 SV=1	1.0046	NA	1.7804	1.7096	1.2318	0.7076	0.2383	0.225	0.400931	0.0503917
EVGETLLYYGCR	P16435	NADPH--cytochrome P450 reductase OS=Homo sapiens OX=9606 GN=POR PE=1 SV=2	1.1249	8.2464	5.4727	23.2013	0.8337	4.5365	9.3715	20.7207	0.93211	0.923553
VGEATETALTCLVEK	P16615	Sarcoplasmic/endoplasmic reticulum calcium ATPase 2 OS=Homo sapiens OX=9606 GN=ATP2A2 PE=1 SV=1	7.9675	7.6447	NA	6.6893	5.3056	5.1541	10.0446	8.537	0.97666	0.910639
DACLNAR	P16615	Sarcoplasmic/endoplasmic reticulum calcium ATPase 2 OS=Homo sapiens OX=9606 GN=ATP2A2 PE=1 SV=1	NA	11.6324	11.5522	13.0549	9.8217	NA	13.2839	11.5893	0.957378	0.667517
KSMSVYCTPNKPSR	P16615	Sarcoplasmic/endoplasmic reticulum calcium ATPase 2 OS=Homo sapiens OX=9606 GN=ATP2A2 PE=1 SV=1	10.9198	19.1404	8.6152	8.4292	8.749	8.7859	8.8149	11.4492	0.802448	0.406382
NYLEPGKECVQPATK	P16615	Sarcoplasmic/endoplasmic reticulum calcium ATPase 2 OS=Homo sapiens OX=9606 GN=ATP2A2 PE=1 SV=1	5.8459	NA	7.1285	6.176	3.8214	4.3889	5.7384	5.5357	0.763081	0.061936
TDDCHPWVLPVVK	P17174	Aspartate aminotransferase, cytoplasmic OS=Homo sapiens OX=9606 GN=GOT1 PE=1 SV=3	9.54372	9.25485	7.69462	6.22525	NA	12.783	16.4722	12.2742	1.6924	0.0107872
TFCGTPDYIAPEIIAYQPYGK	P17252	Protein kinase C alpha type OS=Homo sapiens OX=9606 GN=PRKCA PE=1 SV=4	0.1754	0.3245	0.4769	0.2752	0.1312	0.2116	0.7206	0.7708	1.46502	0.445611
GLGLSPDLVVCR	P17812	CTP synthase 1 OS=Homo sapiens OX=9606 GN=CTPS1 PE=1 SV=2	2.3333	4.6974	5.9456	4.6692	5.726	4.6745	4.6241	3.1286	1.02877	0.895231
LIDFLECGK	P17844	Probable ATP-dependent RNA helicase DDX5 OS=Homo sapiens OX=9606 GN=DDX5 PE=1 SV=1	NA	9.1255	7.6968	6.605	6.8683	5.1795	9.213	5.578	0.859216	0.41473
ELAQQVQQVAAEYCR	P17844	Probable ATP-dependent RNA helicase DDX5 OS=Homo sapiens OX=9606 GN=DDX5 PE=1 SV=1	3.4475	1.4585	1.2872	1.4562	1.9736	1.6498	1.047	1.3357	0.785173	0.483927
LKSTCIYGGAPK	Q92841; P17844	Probable ATP-dependent RNA helicase DDX5 OS=Homo sapiens OX=9606 GN=DDX5 PE=1 SV=1	0.5049	0.6471	0.4557	0.5937	0.5556	0.4003	0.4241	0.6192	0.908149	0.484487
GDGPICLVLAPTR	Q92841; P17844	Probable ATP-dependent RNA helicase DDX5 OS=Homo sapiens OX=9606 GN=DDX5 PE=1 SV=1	0.2079	0.1566	NA	0.278	0.2395	0.2564	0.1226	0.085	0.821206	0.539818
LPLMECVQMTK	P17858	ATP-dependent 6-phosphofructokinase, liver type OS=Homo sapiens OX=9606 GN=PFKL PE=1 SV=6	3.9986	4.625	4.8301	3.4975	3.5079	4.5668	3.9535	2.334	0.847267	0.292478
VFANAPDSACVIGLK	P17858	ATP-dependent 6-phosphofructokinase, liver type OS=Homo sapiens OX=9606 GN=PFKL PE=1 SV=6	0.3156	0.3787	0.2981	0.2544	0.2261	0.3846	0.3695	0.4404	1.1394	0.438847
SQMESMLISGYALNCVVGSQGMPK	P17987	T-complex protein 1 subunit alpha OS=Homo sapiens OX=9606 GN=TCP1 PE=1 SV=1	3.5745	3.4606	3.5263	4.3739	3.0015	5.7264	3.6839	2.8562	1.02228	0.90871
GANDFMCDEMER	P17987	T-complex protein 1 subunit alpha OS=Homo sapiens OX=9606 GN=TCP1 PE=1 SV=1	10.24	10.4024	10.8342	NA	12.5387	30.8661	19.7498	NA	2.0064	0.118827
SLHDALCVVKR	P17987	T-complex protein 1 subunit alpha OS=Homo sapiens OX=9606 GN=TCP1 PE=1 SV=1	1.4515	1.9995	1.923	2.69	1.6672	1.477	2.0413	2.1447	0.909003	0.562712
ICDDELILIK	P17987	T-complex protein 1 subunit alpha OS=Homo sapiens OX=9606 GN=TCP1 PE=1 SV=1	0.724353	0.858502	0.708175	0.849972	0.605559	0.609946	0.682088	0.6924	0.824575	0.0245325
YADLTEDQLPSCESLKDTIAR	P18669	Phosphoglycerate mutase 1 OS=Homo sapiens OX=9606 GN=PGAM1 PE=1 SV=2	0.5106	1.0118	1.3895	0.8851	0.3614	1.7381	1.0034	0.5342	0.957888	0.914538
EALNSCNKR	P19338	Nucleolin OS=Homo sapiens OX=9606 GN=NCL PE=1 SV=3	NA	1.73381	1.49576	1.74613	NA	1.05911	0.92638	1.42331	0.68509	0.036834
LGTDESCFNMILATR	P20073	Annexin A7 OS=Homo sapiens OX=9606 GN=ANXA7 PE=1 SV=3	5.4376	6.4749	6.1295	4.9045	3.6597	8.4991	4.5078	8.5508	1.09896	0.686701
MAQWGNKPVC	P21266	Glutathione S-transferase Mu 3 OS=Homo sapiens OX=9606 GN=GSTM3 PE=1 SV=3	13.1131	14.2666	5.4926	5.5477	7.8351	NA	9.1002	7.3003	0.841076	0.613945
IVGPSGAAVPCKVEPGLGADNSVVR	P21333	Filamin-A OS=Homo sapiens OX=9606 GN=FLNA PE=1 SV=4	5.1238	10.3641	8.7904	10.8445	8.2017	10.7183	7.9787	9.4684	1.03543	0.836367
THEAEIVEGENHTYCIR	P21333	Filamin-A OS=Homo sapiens OX=9606 GN=FLNA PE=1 SV=4	0.6695	0.5259	1.9929	1.7246	1.2987	1.2934	1.1919	1.5034	1.07623	0.811186
ATCAPQHGAPGPGPADASK	P21333	Filamin-A OS=Homo sapiens OX=9606 GN=FLNA PE=1 SV=4	NA	27.9303	23.2147	29.791	29.1547	39.1483	33.3062	26.1043	1.18347	0.240794
VGTECGNQK	P21333	Filamin-A OS=Homo sapiens OX=9606 GN=FLNA PE=1 SV=4	7.0394	7.4725	NA	10.7035	NA	28.3198	46.9465	23.7365	3.92628	0.0267681
AHVVPCFDASK	P21333	Filamin-A OS=Homo sapiens OX=9606 GN=FLNA PE=1 SV=4	1.937	2.9942	7.5101	7.2788	2.7818	5.3753	9.9065	9.0014	1.37246	0.433874
SPYTVTVGQACNPSACR	P21333	Filamin-A OS=Homo sapiens OX=9606 GN=FLNA PE=1 SV=4	NA	9.2489	6.8877	7.1304	NA	10.0714	12.3032	11.7785	1.46788	0.0227671
YQIDPDACFSAK	P21796	Voltage-dependent anion-selective channel protein 1 OS=Homo sapiens OX=9606 GN=VDAC1 PE=1 SV=2	NA	32.7146	35.1491	32.8689	11.7713	NA	47.086	72.2684	1.30172	0.594958
KGTVLLADNVICPGAPDFLAHVR	P21964	Catechol O-methyltransferase OS=Homo sapiens OX=9606 GN=COMT PE=1 SV=2	7.7033	15.5361	9.1479	NA	17.842	10.8319	16.4099	9.3454	1.26043	0.416419
SEGTYCCGPVPVR	P21980	Protein-glutamine gamma-glutamyltransferase 2 OS=Homo sapiens OX=9606 GN=TGM2 PE=1 SV=2	NA	52.4648	96.8878	81.0272	54.8447	38.76	43.7882	41.2718	0.581642	0.040002
NVMVEPHRHEGVFICR	P22087	rRNA 2'-O-methyltransferase fibrillarin OS=Homo sapiens OX=9606 GN=FBL PE=1 SV=2	5.7298	10.9356	7.7979	17.9518	7.0775	7.9881	10.6025	11.8173	0.883775	0.684924
ANCIDSTASAEAVFASEVK	P22087	rRNA 2'-O-methyltransferase fibrillarin OS=Homo sapiens OX=9606 GN=FBL PE=1 SV=2	1.15304	1.65973	1.68107	1.48214	1.25715	1.77565	2.11161	1.45322	1.10403	0.5133
LRECLPLIVFLR	P22090	40S ribosomal protein S4, Y isoform 1 OS=Homo sapiens OX=9606 GN=RPS4Y1 PE=1 SV=2	1.8657	0.3479	0.141	0.1329	0.0694	0.3998	0.2281	0.1663	0.347176	0.374579
FGDPECQVILPLLK	P22102	Trifunctional purine biosynthetic protein adenosine-3 OS=Homo sapiens OX=9606 GN=GART PE=1 SV=1	0.2992	0.9624	0.971	1.1196	0.4803	0.9213	1.0955	1.1795	1.09677	0.747467
SAGVQCFGPTAEAAQLESSKR	P22102	Trifunctional purine biosynthetic protein adenosine-3 OS=Homo sapiens OX=9606 GN=GART PE=1 SV=1	0.6043	0.8926	1.002	0.7955	0.4421	1.0577	0.799	0.8798	0.964849	0.857486
SSLQYSSPAPDGCGDQTLGDLLLTPTR	P22102	Trifunctional purine biosynthetic protein adenosine-3 OS=Homo sapiens OX=9606 GN=GART PE=1 SV=1	5.1009	3.6864	4.6265	NA	4.4282	7.8964	6.973	8.1545	1.53492	0.074572
QVLVAPGNAGTACSEK	P22102	Trifunctional purine biosynthetic protein adenosine-3 OS=Homo sapiens OX=9606 GN=GART PE=1 SV=1	0.4491	0.3904	0.3545	0.7516	0.3553	0.185	0.2633	0.4761	0.657741	0.181185
SGCKVDLGGFAGLFDLK	P22102	Trifunctional purine biosynthetic protein adenosine-3 OS=Homo sapiens OX=9606 GN=GART PE=1 SV=1	3.7602	4.3101	6.4423	8.0075	5.6476	2.9963	3.5833	2.9367	0.67335	0.166776
VLEFNCR	P22102	Trifunctional purine biosynthetic protein adenosine-3 OS=Homo sapiens OX=9606 GN=GART PE=1 SV=1	NA	5.5034	5.5489	5.8932	NA	4.3164	4.824	4.0091	0.775988	0.00911123
AFTKPEEACSFILSADFPALVVK	P22102	Trifunctional purine biosynthetic protein adenosine-3 OS=Homo sapiens OX=9606 GN=GART PE=1 SV=1	NA	5.1172	5.8899	5.6594	NA	5.1125	6.4634	5.86	1.04616	0.601458
QLIQGGVAECVLALGFEK	P22307	Non-specific lipid-transfer protein OS=Homo sapiens OX=9606 GN=SCP2 PE=1 SV=2	1.3884	1.4557	1.1905	0.5381	0.3505	0.6867	2.15	1.7779	1.08581	0.844154
AIYHSLGMTGIPIINVNNNCATGSTALFMAR	P22307	Non-specific lipid-transfer protein OS=Homo sapiens OX=9606 GN=SCP2 PE=1 SV=2	3.4796	1.7541	2.7895	4.0631	1.2094	6.6347	2.2178	5.7749	1.31031	0.531991
YFLVGAGAIGCELLK	P22314	Ubiquitin-like modifier-activating enzyme 1 OS=Homo sapiens OX=9606 GN=UBA1 PE=1 SV=3	0.008	0.0689	0.1099	0.0443	0.1262	0.0098	0.0692	0.1204	1.40891	0.519331
VLGPYTFSICDTSNFSDYIR	P22314	Ubiquitin-like modifier-activating enzyme 1 OS=Homo sapiens OX=9606 GN=UBA1 PE=1 SV=3	5.2056	9.0568	4.221	9.1254	4.7966	7.7088	3.2889	9.5149	0.916708	0.772366
AVPTGDMEDLPCGLVLSSIGYK	P22570	NADPH:adrenodoxin oxidoreductase, mitochondrial OS=Homo sapiens OX=9606 GN=FDXR PE=1 SV=3	NA	0.8904	1.0938	0.8901	NA	0.5725	0.6821	0.5555	0.629753	0.0107127
TPQICVVGSGPAGFYTAQHLLK	P22570	NADPH:adrenodoxin oxidoreductase, mitochondrial OS=Homo sapiens OX=9606 GN=FDXR PE=1 SV=3	NA	0.6897	1.2459	0.6449	NA	0.3987	0.6744	0.6348	0.661848	0.241221
ALEIPGEELPGVCSAR	P22570	NADPH:adrenodoxin oxidoreductase, mitochondrial OS=Homo sapiens OX=9606 GN=FDXR PE=1 SV=3	1.3345	2.164	2.4728	2.5948	1.1349	2.7769	2.2692	2.4333	1.00563	0.979733
SYPLVCIAK	P23141	Liver carboxylesterase 1 OS=Homo sapiens OX=9606 GN=CES1 PE=1 SV=2	11.2423	9.3698	8.4513	10.4787	7.7229	9.3641	4.5801	5.3277	0.682685	0.0470909
TTTSAVMVHCLR	P23141	Liver carboxylesterase 1 OS=Homo sapiens OX=9606 GN=CES1 PE=1 SV=2	0.1093	0.21	0.1385	0.2031	0.1388	0.0426	0.1829	0.2757	0.968376	0.926519
MSPHSLTCVTSSHWDRPYSR	P23378	Glycine dehydrogenase (decarboxylating), mitochondrial OS=Homo sapiens OX=9606 GN=GLDC PE=1 SV=2	9.2932	11.3897	11.9999	15.1317	10.5693	14.4987	13.4295	10.3921	1.02248	0.871072
DRTDIQCLIPCAIDQDPYFR	P23381	Tryptophan--tRNA ligase, cytoplasmic OS=Homo sapiens OX=9606 GN=WARS PE=1 SV=2	1.7951	1.5124	1.5174	1.3591	NA	0.798	0.8536	0.8357	0.536287	0.00118438
GIFGFTDSDCIGK	P23381	Tryptophan--tRNA ligase, cytoplasmic OS=Homo sapiens OX=9606 GN=WARS PE=1 SV=2	1.9835	2.7531	3.1806	3.1709	1.7651	2.6509	2.1789	2.5353	0.823423	0.205475
GLCAIAQAESLR	P23396	40S ribosomal protein S3 OS=Homo sapiens OX=9606 GN=RPS3 PE=1 SV=2	10.5914	7.8636	9.5768	9.9763	15.4216	22.5597	13.3658	10.4157	1.62499	0.0663375
QAQYLGMSCDGPFKPDHYRY	P23526	Adenosylhomocysteinase OS=Homo sapiens OX=9606 GN=AHCY PE=1 SV=4	4.36946	5.93764	3.89702	4.36964	4.73571	5.10991	4.86301	4.25707	1.0211	0.845071
MLPDKDCR	P23528	Cofilin-1 OS=Homo sapiens OX=9606 GN=CFL1 PE=1 SV=3	5.7375	3.6223	4.7584	5.3664	7.766	5.0281	4.4199	4.4561	1.11217	0.574243
CTLAEKLGGSAVISLEGKPL	P23528	Cofilin-1 OS=Homo sapiens OX=9606 GN=CFL1 PE=1 SV=3	16.3405	NA	33.5361	28.1084	19.6896	22.3778	33.0174	NA	0.962811	0.889051
LTGIKHELQANCYEEVKDR	P23528	Cofilin-1 OS=Homo sapiens OX=9606 GN=CFL1 PE=1 SV=3	5.799	5.1667	4.8361	4.8382	5.6993	5.6034	5.0119	5.1208	1.03854	0.510401
AVLFCLSEDKK	P23528	Cofilin-1 OS=Homo sapiens OX=9606 GN=CFL1 PE=1 SV=3	4.7487	3.6886	4.8342	3.7188	4.1069	3.9085	4.1572	NA	0.955259	0.636112
QITKEDFATFDYILCMDESNLR	P24666	Low molecular weight phosphotyrosine protein phosphatase OS=Homo sapiens OX=9606 GN=ACP1 PE=1 SV=3	NA	5.4192	4.4818	4.5018	1.4429	5.4819	6.2206	6.8938	1.04351	0.892596
IHMGSCAENTAK	P24752	Acetyl-CoA acetyltransferase, mitochondrial OS=Homo sapiens OX=9606 GN=ACAT1 PE=1 SV=1	12.3595	NA	17.5153	25.0343	30.0928	37.1204	45.7794	40.5348	2.09702	0.00984739
YVLCTAPR	P25205	DNA replication licensing factor MCM3 OS=Homo sapiens OX=9606 GN=MCM3 PE=1 SV=3	2.8154	3.7269	3.6921	2.1418	2.3884	2.0169	1.9649	1.4722	0.633668	0.0371726
TVLIACNVK	P25205	DNA replication licensing factor MCM3 OS=Homo sapiens OX=9606 GN=MCM3 PE=1 SV=3	NA	17.2106	11.3513	11.8111	14.6932	NA	10.199	11.2707	0.89572	0.577647
HIPGAAFFDIDQCSDR	P25325	3-mercaptopyruvate sulfurtransferase OS=Homo sapiens OX=9606 GN=MPST PE=1 SV=3	0.172	0.7067	0.3934	0.6772	0.1585	0.865	0.5844	0.7397	1.20433	0.635131
LGEWVGLCK	P25398	40S ribosomal protein S12 OS=Homo sapiens OX=9606 GN=RPS12 PE=1 SV=3	0.9739	1.1933	1.2846	1.0319	0.6569	1.633	1.5148	1.0344	1.07926	0.71987
YCDPDSYHRR	P26368	Splicing factor U2AF 65 kDa subunit OS=Homo sapiens OX=9606 GN=U2AF2 PE=1 SV=4	13.1003	29.5891	26.0804	38.0877	7.6358	NA	13.1358	13.2839	0.424934	0.0597706
LSLDGQNIYNACCTLR	P26599	Polypyrimidine tract-binding protein 1 OS=Homo sapiens OX=9606 GN=PTBP1 PE=1 SV=1	NA	2.3191	2.9197	4.1648	1.0934	1.9859	3.8771	3.7726	0.85571	0.646976
GSDELFSTCVTNGPFIMSSNSASAANGNDSK	P26599	Polypyrimidine tract-binding protein 1 OS=Homo sapiens OX=9606 GN=PTBP1 PE=1 SV=1	8.44738	6.3674	7.04965	5.04652	5.0502	5.08329	7.08652	4.06238	0.790845	0.189378
TTPYQIACGISQGLADNTVIAK	P26639	Threonine--tRNA ligase, cytoplasmic OS=Homo sapiens OX=9606 GN=TARS PE=1 SV=3	5.064	4.3506	3.3706	4.8205	2.4458	5.6588	2.6349	2.9878	0.779708	0.29167
CGEMAQAASAAVTR	P26640	Valine--tRNA ligase OS=Homo sapiens OX=9606 GN=VARS PE=1 SV=4	NA	7.9281	18.8918	11.3435	NA	9.6561	15.301	11.6741	0.959852	0.895074
WFLTCINQPQFR	P26641	Elongation factor 1-gamma OS=Homo sapiens OX=9606 GN=EEF1G PE=1 SV=3	2.0879	1.2208	1.6725	1.9476	0.8249	0.794	1.1	1.1889	0.563994	0.012627
AAAPAPEEEMDECEQALAAEPK	P26641	Elongation factor 1-gamma OS=Homo sapiens OX=9606 GN=EEF1G PE=1 SV=3	9.08647	9.79039	10.0795	12.2848	9.94418	9.67579	9.60312	11.629	0.990568	0.911563
YLAEVACGDDRK	P27348	14-3-3 protein theta OS=Homo sapiens OX=9606 GN=YWHAQ PE=1 SV=1	4.59553	8.43804	14.7655	NA	6.19661	7.5854	7.35956	NA	1.04366	0.499986
LAEQAERYDDMATCMK	P27348	14-3-3 protein theta OS=Homo sapiens OX=9606 GN=YWHAQ PE=1 SV=1	5.8636	7.2739	8.5088	9.927	6.0858	9.2584	6.2821	6.3737	0.886825	0.466676
SCGKDGFHIR	P27635	60S ribosomal protein L10 OS=Homo sapiens OX=9606 GN=RPL10 PE=1 SV=4	0.4288	0.766	0.5022	0.282	0.4777	1.0495	0.291	0.4735	1.15801	0.700057
VDEFPLCGHMVSDEYEQLSSEALEAAR	P27635	60S ribosomal protein L10 OS=Homo sapiens OX=9606 GN=RPL10 PE=1 SV=4	0.2784	0.3818	0.3337	0.2224	0.3652	0.7725	0.2891	0.3613	1.47011	0.260849
ICANKYMVK	P27635	60S ribosomal protein L10 OS=Homo sapiens OX=9606 GN=RPL10 PE=1 SV=4	6.2118	11.449	9.3265	6.0346	10.4128	8.3586	10.8691	NA	1.1968	0.376459
MLSCAGADRLQTGMR	P27635	60S ribosomal protein L10 OS=Homo sapiens OX=9606 GN=RPL10 PE=1 SV=4	1.3165	1.5895	1.3758	1.5215	1.8436	2.1121	1.3798	1.4865	1.17554	0.205594
DSLVDIIGICK	P27694	Replication protein A 70 kDa DNA-binding subunit OS=Homo sapiens OX=9606 GN=RPA1 PE=1 SV=2	NA	4.1713	4.4144	3.4854	NA	3.5361	4.8273	2.4793	0.898236	0.606547
LFPNSLDQTDMHGDSEYNIMFGPDICGPGTK	P27797	Calreticulin OS=Homo sapiens OX=9606 GN=CALR PE=1 SV=1	0.2328	0.223	0.2267	0.1561	0.1876	0.2489	0.2764	0.2366	1.13224	0.324371
HEQNIDCGGGYVK	P27797	Calreticulin OS=Homo sapiens OX=9606 GN=CALR PE=1 SV=1	0.0336	0.0448	0.0548	0.0565	0.0361	0.0535	0.0539	0.0501	1.02056	0.889725
CSLPAEEDSVLEK	P27816	Microtubule-associated protein 4 OS=Homo sapiens OX=9606 GN=MAP4 PE=1 SV=3	NA	9.3623	9.134	11.744	17.642	5.5296	NA	8.6959	1.05381	0.891173
NVCLPPEMEVALTEDQVPALKTEAPLAK	P27816	Microtubule-associated protein 4 OS=Homo sapiens OX=9606 GN=MAP4 PE=1 SV=3	3.1598	4.114	5.6358	4.1637	4.411	4.4517	4.2057	3.7806	0.986863	0.919731
CGEDYKLHFIFR	P27824	Calnexin OS=Homo sapiens OX=9606 GN=CANX PE=1 SV=2	0.4991	0.638	0.6474	0.4922	0.4993	0.6091	0.6692	0.6277	1.05649	0.585941
CESAPGCGVWQRPVIDNPNYKGK	P27824	Calnexin OS=Homo sapiens OX=9606 GN=CANX PE=1 SV=2	0.0979	0.076	0.155	0.0168	0.1171	0.1501	0.1685	0.0661	1.45155	0.324103
SAGACTAAAFLKEFVTHPK	P28838	Cytosol aminopeptidase OS=Homo sapiens OX=9606 GN=LAP3 PE=1 SV=3	0.7617	0.8209	0.9247	0.8541	0.6032	0.6759	0.6464	0.7225	0.787767	0.00555424
QVVDCQLADVNNIGKYR	P28838	Cytosol aminopeptidase OS=Homo sapiens OX=9606 GN=LAP3 PE=1 SV=3	4.3272	2.4202	4.1851	2.1665	2.5787	3.79	4.0957	NA	1.06516	0.794732
LILADALCYAHTFNPK	P28838	Cytosol aminopeptidase OS=Homo sapiens OX=9606 GN=LAP3 PE=1 SV=3	NA	10.4439	10.5046	8.446	5.7064	10.2964	9.6904	5.7993	0.80353	0.272595
QAGEVVCEAIKNEMNVMLK	P29218	Inositol monophosphatase 1 OS=Homo sapiens OX=9606 GN=IMPA1 PE=1 SV=1	4.0616	3.3293	NA	3.8852	6.2867	NA	6.9694	5.7049	1.68152	0.00388027
QAFTDVATGSLGQGLGAACGMAYTGK	P29401	Transketolase OS=Homo sapiens OX=9606 GN=TKT PE=1 SV=3	NA	0.4243	0.6613	0.7694	0.303	0.2529	0.5851	0.5841	0.69748	0.22625
TVPFCSTFAAFFTR	P29401	Transketolase OS=Homo sapiens OX=9606 GN=TKT PE=1 SV=3	NA	1.5289	1.5314	1.6293	1.6584	2.0893	1.3523	1.6619	1.08142	0.514056
LAGECGGK	P30038	Delta-1-pyrroline-5-carboxylate dehydrogenase, mitochondrial OS=Homo sapiens OX=9606 GN=ALDH4A1 PE=1 SV=3	0.250957	0.299465	0.322684	NA	0.106813	0.111668	0.119353	NA	0.386935	0.00113977
DFTPVCTTELGR	P30041	Peroxiredoxin-6 OS=Homo sapiens OX=9606 GN=PRDX6 PE=1 SV=3	0.2511	0.2212	0.29	0.3823	0.3802	0.2815	0.2938	0.172	0.98506	0.940807
DINAYNCEEPTEK	P30041	Peroxiredoxin-6 OS=Homo sapiens OX=9606 GN=PRDX6 PE=1 SV=3	NA	1.56566	1.52121	2.23613	0.888422	NA	0.858235	1.00091	0.516169	0.0217996
GVLFGVPGAFTPGCSK	P30044	Peroxiredoxin-5, mitochondrial OS=Homo sapiens OX=9606 GN=PRDX5 PE=1 SV=4	0.8021	0.8723	0.9872	1.2266	1.0941	0.7408	0.5751	1.2527	0.942004	0.766762
CTGGEVGATSALAPK	P30050	60S ribosomal protein L12 OS=Homo sapiens OX=9606 GN=RPL12 PE=1 SV=1	1.1494	1.9289	1.7797	1.2795	1.1017	1.8813	1.4018	1.2195	0.913124	0.620303
HPHDIIDDINSGAVECPAS	P30050	60S ribosomal protein L12 OS=Homo sapiens OX=9606 GN=RPL12 PE=1 SV=1	NA	0.4217	0.5089	0.959	NA	1.2948	0.974	0.4903	1.46015	0.369733
YVWLVYEQDRPLKCDEPILSNR	P30086	Phosphatidylethanolamine-binding protein 1 OS=Homo sapiens OX=9606 GN=PEBP1 PE=1 SV=3	3.9687	2.3073	5.2	1.5574	0.5888	2.3598	1.0168	5.5243	0.728106	0.546088
VDCTANTNTCNK	P30101	Protein disulfide-isomerase A3 OS=Homo sapiens OX=9606 GN=PDIA3 PE=1 SV=4	0.0349	0.0475	0.0466	0.0241	0.0293	0.0551	0.0415	0.0793	1.3403	0.321609
FIQENIFGICPHMTEDNKDLIQGK	P30101	Protein disulfide-isomerase A3 OS=Homo sapiens OX=9606 GN=PDIA3 PE=1 SV=4	0.1086	0.0602	0.0772	0.0661	0.0642	0.0798	0.0925	0.1154	1.12752	0.538943
FFAPWCGHCK	P30101	Protein disulfide-isomerase A3 OS=Homo sapiens OX=9606 GN=PDIA3 PE=1 SV=4	12.9772	14.4088	NA	12.1272	10.0339	25.256	12.0005	NA	1.19683	0.619653
TDLVPAFQNLMKDCEAEVR	P30153	Serine/threonine-protein phosphatase 2A 65 kDa regulatory subunit A alpha isoform OS=Homo sapiens OX=9606 GN=PPP2R1A PE=1 SV=4	0.561105	0.372466	0.590826	0.376088	0.210064	0.25666	0.341072	NA	0.57	0.0429516
KGGSYSQAASSDSAQGSDVSLTACKV	P05534; P01892	HLA class I histocompatibility antigen, A-23 alpha chain OS=Homo sapiens OX=9606 GN=HLA-A PE=1 SV=1	NA	8.3692	8.2311	9.5301	7.0472	7.5242	7.9065	NA	0.86022	0.0646196
MCDLVSDFDGFSER	P30520	Adenylosuccinate synthetase isozyme 2 OS=Homo sapiens OX=9606 GN=ADSS PE=1 SV=3	1.2445	2.496	3.0101	1.7755	2.4517	1.4866	2.234	1.3267	0.879535	0.609793
TIPMDGQHFCFTR	P30837	Aldehyde dehydrogenase X, mitochondrial OS=Homo sapiens OX=9606 GN=ALDH1B1 PE=1 SV=3	1.2527	1.6687	NA	1.6734	0.906	0.5273	0.4807	0.5961	0.409719	0.00259368
QEDMPFTCEGITPDIIINPHAIPSR	P30876	DNA-directed RNA polymerase II subunit RPB2 OS=Homo sapiens OX=9606 GN=POLR2B PE=1 SV=1	NA	1.5739	2.6955	2.8445	1.4873	1.8189	1.8643	0.4512	0.592681	0.118953
NALVSHLDGTTPVCEDIGR	P31930	Cytochrome b-c1 complex subunit 1, mitochondrial OS=Homo sapiens OX=9606 GN=UQCRC1 PE=1 SV=3	0.7583	0.8074	0.5869	0.7645	0.0989	0.8339	0.6721	0.6448	0.771211	0.357089
MSSFGDFVALSDVCDVPTAK	P31939	Bifunctional purine biosynthesis protein PURH OS=Homo sapiens OX=9606 GN=ATIC PE=1 SV=3	0.036	0.1821	0.2249	0.2214	0.0418	0.2029	0.2267	0.188	0.992474	0.984315
FFSDCKIQNGAQGIR	P31943	Heterogeneous nuclear ribonucleoprotein H OS=Homo sapiens OX=9606 GN=HNRNPH1 PE=1 SV=4	5.8959	5.3935	6.2826	6.3875	NA	3.9627	3.4555	3.6503	0.615956	0.000544021
GLPWSCSADEVQR	P31943	Heterogeneous nuclear ribonucleoprotein H OS=Homo sapiens OX=9606 GN=HNRNPH1 PE=1 SV=4	0.4687	2.5478	3.4924	3.0243	0.8511	2.5343	3.0004	3.2773	1.01363	0.971111
YGDGGSTFQSTTGHCVHMR	P31943	Heterogeneous nuclear ribonucleoprotein H OS=Homo sapiens OX=9606 GN=HNRNPH1 PE=1 SV=4	14.2594	16.1008	15.1611	18.8176	13.3021	16.5018	15.6756	12.6764	0.9039	0.29509
DLNYCFSGMSDHR	P31943; P55795	Heterogeneous nuclear ribonucleoprotein H OS=Homo sapiens OX=9606 GN=HNRNPH1 PE=1 SV=4	0.605	0.6444	0.5614	NA	0.6339	0.4753	1.1011	1.2712	1.44197	0.286755
KGDYQKAYEDGCK	P31948	Stress-induced-phosphoprotein 1 OS=Homo sapiens OX=9606 GN=STIP1 PE=1 SV=1	0.6882	0.574	2.2264	1.155	1.2519	0.8098	0.771	0.4606	0.709213	0.442246
ALSVGNIDDALQCYSEAIKLDPHNHVLYSNR	P31948	Stress-induced-phosphoprotein 1 OS=Homo sapiens OX=9606 GN=STIP1 PE=1 SV=1	2.8338	3.0935	2.8301	3.7558	3.3729	3.1304	2.6765	2.8183	0.958835	0.648345
ALDLDSSCKEAADGYQR	P31948	Stress-induced-phosphoprotein 1 OS=Homo sapiens OX=9606 GN=STIP1 PE=1 SV=1	23.1953	20.2234	25.4936	25.8975	22.608	21.8508	25.5644	37.3612	1.13263	0.442509
NKGNECFQK	P31948	Stress-induced-phosphoprotein 1 OS=Homo sapiens OX=9606 GN=STIP1 PE=1 SV=1	5.00761	NA	6.16392	6.88607	6.20779	6.26531	4.862	4.84739	0.921323	0.503699
CMTNTPVVVR	P32322	Pyrroline-5-carboxylate reductase 1, mitochondrial OS=Homo sapiens OX=9606 GN=PYCR1 PE=1 SV=2	1.805	1.5661	1.4597	2.6858	1.6051	1.7555	1.7363	2.5968	1.02356	0.905921
SLLINAVEASCIR	Q96C36; P32322	Pyrroline-5-carboxylate reductase 1, mitochondrial OS=Homo sapiens OX=9606 GN=PYCR1 PE=1 SV=2	2.7269	4.3235	2.8989	4.4334	3.5855	4.9334	4.0629	3.5684	1.12289	0.45645
TICSHVQNMIK	P32969	60S ribosomal protein L9 OS=Homo sapiens OX=9606 GN=RPL9 PE=1 SV=1	0.2315	0.2577	NA	0.3545	0.3515	0.7226	0.2578	0.3956	1.53565	0.277366
GIQVSNNGPCLGSR	P33121	Long-chain-fatty-acid--CoA ligase 1 OS=Homo sapiens OX=9606 GN=ACSL1 PE=1 SV=1	1.021	1.3041	1.3867	1.5901	1.1626	1.2854	1.6097	1.454	1.03957	0.743633
RKPKPPAPEDLAVICFTSGTTGNPK	P33121	Long-chain-fatty-acid--CoA ligase 1 OS=Homo sapiens OX=9606 GN=ACSL1 PE=1 SV=1	4.5215	4.7204	5.7523	7.3208	5.52	5.294	4.8888	5.5652	0.953081	0.704829
VFQSSTSQEQVYNDCAK	P33176	Kinesin-1 heavy chain OS=Homo sapiens OX=9606 GN=KIF5B PE=1 SV=1	NA	4.4407	10.469	4.8674	NA	4.2875	4.4652	3.7334	0.631341	0.28164
KCEEEIAK	P33176	Kinesin-1 heavy chain OS=Homo sapiens OX=9606 GN=KIF5B PE=1 SV=1	3.5465	2.6472	1.9659	4.5348	2.9206	2.2522	4.5536	2.3001	0.947386	0.836429
FVCSPDEVMDTIDEGKSNR	P33176	Kinesin-1 heavy chain OS=Homo sapiens OX=9606 GN=KIF5B PE=1 SV=1	3.0895	3.226	2.8412	2.8141	2.8977	2.8393	2.6177	2.5305	0.909313	0.086534
LCVQNSPQEAR	P33240	Cleavage stimulation factor subunit 2 OS=Homo sapiens OX=9606 GN=CSTF2 PE=1 SV=1	6.3158	7.6514	5.4481	NA	6.4416	6.4073	5.2008	NA	0.929664	0.581319
AGIICQLNAR	P33991	DNA replication licensing factor MCM4 OS=Homo sapiens OX=9606 GN=MCM4 PE=1 SV=5	7.0112	8.8407	8.3661	6.0501	3.3933	5.6578	4.8289	3.7788	0.583413	0.00843726
CSVLAAANSVFGR	P33992	DNA replication licensing factor MCM5 OS=Homo sapiens OX=9606 GN=MCM5 PE=1 SV=5	NA	0.6903	0.8555	0.5828	NA	0.678	0.4828	0.5064	0.783238	0.200192
CSILAAANPAYGR	P33993	DNA replication licensing factor MCM7 OS=Homo sapiens OX=9606 GN=MCM7 PE=1 SV=4	1.146	1.8717	3.3308	2.6759	1.1755	3.3355	3.2666	1.6406	1.04364	0.897214
WNSPAEEGSSDCEVFSK	P34932	Heat shock 70 kDa protein 4 OS=Homo sapiens OX=9606 GN=HSPA4 PE=1 SV=4	10.3194	18.6346	14.4331	24.639	NA	14.7081	13.8271	10.9033	0.773007	0.349825
AGDREDITEPAICALR	P35222	Catenin beta-1 OS=Homo sapiens OX=9606 GN=CTNNB1 PE=1 SV=1	3.1592	3.3742	4.1584	3.9089	3.4895	3.0339	3.4276	4.7503	1.00689	0.956106
NLALCPANHAPLR	P35222	Catenin beta-1 OS=Homo sapiens OX=9606 GN=CTNNB1 PE=1 SV=1	2.02582	2.52289	2.02874	2.20823	2.02016	2.14231	2.86031	2.67511	1.10383	0.368331
DMGSCEIYPQTIQHNPNGR	P35606	Coatomer subunit beta' OS=Homo sapiens OX=9606 GN=COPB2 PE=1 SV=2	NA	1.8969	1.9983	2.3464	NA	1.4097	1.5243	1.5016	0.710651	0.0128167
SSEHINEGETAMLVCK	P35613	Basigin OS=Homo sapiens OX=9606 GN=BSG PE=1 SV=2	0.0255	0.0399	0.03	0.0225	0.0135	0.019	0.0236	0.0158	0.609839	0.0394847
VVVFIKPTCPYCR	P35754	Glutaredoxin-1 OS=Homo sapiens OX=9606 GN=GLRX PE=1 SV=2	NA	0.2502	0.2085	0.1856	0.2691	0.2703	0.2441	0.2835	1.24205	0.0380536
CSSFMAPPVTDLGELR	P36551	Oxygen-dependent coproporphyrinogen-III oxidase, mitochondrial OS=Homo sapiens OX=9606 GN=CPOX PE=1 SV=3	1.17783	1.5137	0.802315	0.724375	1.21741	1.39929	0.76165	1.03212	1.04558	0.839673
SGQGAFGNMCR	P36578	60S ribosomal protein L4 OS=Homo sapiens OX=9606 GN=RPL4 PE=1 SV=5	1.214	1.2877	1.0225	0.7637	1.6946	2.5272	0.7667	0.9009	1.37349	0.380807
YAICSALAASALPALVMSK	P36578	60S ribosomal protein L4 OS=Homo sapiens OX=9606 GN=RPL4 PE=1 SV=5	0.0932	0.0437	0.1275	0.0343	0.108	0.1732	0.1217	0.0544	1.53097	0.271607
FCIWTESAFR	P36578	60S ribosomal protein L4 OS=Homo sapiens OX=9606 GN=RPL4 PE=1 SV=5	0.0265	0.0369	0.0643	0.0239	0.0416	0.1066	0.0909	0.0502	1.90831	0.107516
GPCIIYNEDNGIIK	P36578	60S ribosomal protein L4 OS=Homo sapiens OX=9606 GN=RPL4 PE=1 SV=5	0.478454	0.353006	0.368223	0.271178	0.395871	0.448522	0.403565	0.327515	1.07112	0.615545
CLGHPEEFYNLVR	P37268	Squalene synthase OS=Homo sapiens OX=9606 GN=FDFT1 PE=1 SV=1	2.1809	NA	3.4338	5.1474	4.5899	2.8025	2.0049	2.0495	0.797716	0.506373
TQNLPNCQLISR	P37268	Squalene synthase OS=Homo sapiens OX=9606 GN=FDFT1 PE=1 SV=1	11.9454	11.715	13.8994	10.3463	NA	15.7531	13.8046	12.749	1.17749	0.120332
ALAGCDFLTISPK	P37837	Transaldolase OS=Homo sapiens OX=9606 GN=TALDO1 PE=1 SV=2	NA	0.3008	0.5947	0.3461	NA	0.3468	0.7074	0.5493	1.29148	0.433512
EVIAVSCGPAQCQETIR	P38117	Electron transfer flavoprotein subunit beta OS=Homo sapiens OX=9606 GN=ETFB PE=1 SV=3	0.7029	0.912	0.9662	1.2839	1.0344	0.3336	0.9986	1.0365	0.880492	0.602765
HSMNPFCEIAVEEAVR	P38117	Electron transfer flavoprotein subunit beta OS=Homo sapiens OX=9606 GN=ETFB PE=1 SV=3	0.209	0.4406	0.6008	0.5913	0.2387	0.4001	0.4834	0.273	0.757561	0.339734
VLDALFPCVQGGTTAIPGAFGCGK	P38606	V-type proton ATPase catalytic subunit A OS=Homo sapiens OX=9606 GN=ATP6V1A PE=1 SV=2	0.229	0.3398	0.3074	0.2273	0.3389	0.31	0.2466	0.2345	1.02401	0.866717
CELSSSVQTDINLPYLTMDSSGPK	P38646	Stress-70 protein, mitochondrial OS=Homo sapiens OX=9606 GN=HSPA9 PE=1 SV=2	NA	6.02762	5.73036	5.51452	4.86443	6.73287	5.12518	5.24141	0.953707	0.626143
KVACIGAWHPAR	P39023	60S ribosomal protein L3 OS=Homo sapiens OX=9606 GN=RPL3 PE=1 SV=2	3.7829	3.7727	4.1465	3.9498	3.3088	5.0645	3.8311	4.0891	1.04099	0.68643
SLDLFNCEVTNLNDYR	P39687; Q92688	Acidic leucine-rich nuclear phosphoprotein 32 family member A OS=Homo sapiens OX=9606 GN=ANP32A PE=1 SV=1	0.429932	0.538483	0.368532	0.489862	0.222444	0.487804	0.317861	NA	0.750386	0.204678
VYAAATEDMDCLTFGSPVLMR	P39748	Flap endonuclease 1 OS=Homo sapiens OX=9606 GN=FEN1 PE=1 SV=1	NA	2.4504	3.0006	2.5896	NA	1.7357	2.3382	2.2902	0.791496	0.0928847
NAIDDGCVVPGAGAVEVAMAEALIK	P40227	T-complex protein 1 subunit zeta OS=Homo sapiens OX=9606 GN=CCT6A PE=1 SV=3	1.7597	1.7161	1.4421	NA	2.4348	1.5879	0.695	0.8202	0.844553	0.62018
VCGDSDKGFVVINQK	P40227	T-complex protein 1 subunit zeta OS=Homo sapiens OX=9606 GN=CCT6A PE=1 SV=3	1.70606	1.05919	1.17396	1.8798	0.884397	0.964637	1.24552	1.36459	0.766306	0.189687
YCRPESQEHPEADPGSAAPYLK	P40763	Signal transducer and activator of transcription 3 OS=Homo sapiens OX=9606 GN=STAT3 PE=1 SV=2	7.27	7.3524	NA	5.7935	8.2819	8.4705	NA	9.3849	1.28024	0.0353659
AICDHVR	P40925	Malate dehydrogenase, cytoplasmic OS=Homo sapiens OX=9606 GN=MDH1 PE=1 SV=4	6.4899	7.5927	6.7097	7.8815	3.2269	2.1062	4.8989	5.0338	0.532395	0.00508192
ALMGLYHGQVLCK	P40939	Trifunctional enzyme subunit alpha, mitochondrial OS=Homo sapiens OX=9606 GN=HADHA PE=1 SV=2	0.3985	0.7614	0.8525	0.6468	0.3248	0.9695	0.7661	0.7403	1.05321	0.83938
SAVLISSKPGCFIAGADINMLAACK	P40939	Trifunctional enzyme subunit alpha, mitochondrial OS=Homo sapiens OX=9606 GN=HADHA PE=1 SV=2	1.0975	1.2004	1.3456	2.1002	0.3922	2.05	1.1164	1.3286	0.85088	0.620111
CLAPMMSEVIR	P40939	Trifunctional enzyme subunit alpha, mitochondrial OS=Homo sapiens OX=9606 GN=HADHA PE=1 SV=2	0.0749	0.121	0.1587	0.0937	NA	0.1154	0.119	0.1029	1.0032	0.987586
EVEAVIPDHCIFASNTSALPISEIAAVSK	P40939	Trifunctional enzyme subunit alpha, mitochondrial OS=Homo sapiens OX=9606 GN=HADHA PE=1 SV=2	0.1042	0.6411	0.1369	0.2605	0.0311	0.1541	0.1358	0.1226	0.388203	0.215275
QFTPCQLLADHANSPNKK	P40939	Trifunctional enzyme subunit alpha, mitochondrial OS=Homo sapiens OX=9606 GN=HADHA PE=1 SV=2	0.095	0.1619	0.1604	0.1675	0.1007	0.1814	0.1541	0.1203	0.951607	0.784809
TGIEQGSDAGYLCESQK	P40939	Trifunctional enzyme subunit alpha, mitochondrial OS=Homo sapiens OX=9606 GN=HADHA PE=1 SV=2	2.58144	3.2582	3.17532	4.58513	2.39977	4.16843	4.98462	NA	1.13262	0.602153
SCGSSTPDEFPTDIPGTK	P41091	Eukaryotic translation initiation factor 2 subunit 3 OS=Homo sapiens OX=9606 GN=EIF2S3 PE=1 SV=3	4.5787	5.3744	4.717	6.5472	4.8149	4.9941	9.6503	NA	1.22286	0.445155
GNSPPSSGEACREEK	P41227	N-alpha-acetyltransferase 10 OS=Homo sapiens OX=9606 GN=NAA10 PE=1 SV=1	15.8801	NA	10.4	11.4284	9.718	8.1201	10.5044	9.8244	0.759117	0.104475
CSVLPLSQNQEFMPFVK	P41250	Glycine--tRNA ligase OS=Homo sapiens OX=9606 GN=GARS PE=1 SV=3	NA	0.3855	0.5895	0.5902	0.0833	0.6811	0.556	0.6027	0.921496	0.818734
SCYDLSCHAR	P41250	Glycine--tRNA ligase OS=Homo sapiens OX=9606 GN=GARS PE=1 SV=3	71.5025	NA	100.33	104.56	NA	144.308	65.5288	96.1549	1.10709	0.715064
NNDLCYWVPELVR	P41252	Isoleucine--tRNA ligase, cytoplasmic OS=Homo sapiens OX=9606 GN=IARS PE=1 SV=2	7.9789	9.5489	9.2559	9.9552	4.8189	3.6598	15.435	19.1279	1.17155	0.698063
KDSLPVCPVDASGCFTTEVTDFAGQYVK	P41252	Isoleucine--tRNA ligase, cytoplasmic OS=Homo sapiens OX=9606 GN=IARS PE=1 SV=2	1.0183	2.3005	1.8898	2.3417	0.8792	NA	1.4474	0.7061	0.535555	0.0848904
YCFPNYVGRPK	P42025	Beta-centractin OS=Homo sapiens OX=9606 GN=ACTR1B PE=1 SV=1	NA	2.521	2.8406	2.9727	NA	1.4422	2.3959	1.8246	0.679445	0.044436
YCLPFLQPGR	P42285	Exosome RNA helicase MTR4 OS=Homo sapiens OX=9606 GN=MTREX PE=1 SV=3	NA	2.004	3.522	1.296	2.245	4.3068	4.6801	1.849	1.43809	0.368656
YKPVCNQVECHPYFNR	P42330	Aldo-keto reductase family 1 member C3 OS=Homo sapiens OX=9606 GN=AKR1C3 PE=1 SV=4	NA	1.3269	1.7469	1.8054	NA	0.7963	1.023	0.931	0.563678	0.0124946
EDGPSVFGSFFLQHCVTMNTPVEK	P42704	Leucine-rich PPR motif-containing protein, mitochondrial OS=Homo sapiens OX=9606 GN=LRPPRC PE=1 SV=3	NA	1.0447	1.6441	1.2542	NA	0.9161	1.0446	0.9599	0.740705	0.130653
LIASYCNVGDIEGASK	P42704	Leucine-rich PPR motif-containing protein, mitochondrial OS=Homo sapiens OX=9606 GN=LRPPRC PE=1 SV=3	1.1387	1.5614	1.8282	NA	1.786	1.6522	2.0771	2.3617	1.30463	0.126865
SCGSLLPELKLEER	P42704	Leucine-rich PPR motif-containing protein, mitochondrial OS=Homo sapiens OX=9606 GN=LRPPRC PE=1 SV=3	4.0334	7.058	6.8642	6.4923	3.5769	NA	3.8161	4.7998	0.664968	0.0693585
YCQEPR	P42704	Leucine-rich PPR motif-containing protein, mitochondrial OS=Homo sapiens OX=9606 GN=LRPPRC PE=1 SV=3	76.8037	75.6547	91.2289	91.9279	62.0803	46.9471	70.6582	39.8735	0.654199	0.0128525
LFECDRDQMYYNLLK	P42704	Leucine-rich PPR motif-containing protein, mitochondrial OS=Homo sapiens OX=9606 GN=LRPPRC PE=1 SV=3	8.6243	6.0242	7.0844	8.6723	3.822	6.0927	7.622	6.6868	0.796689	0.185057
LQWFCDR	P42704	Leucine-rich PPR motif-containing protein, mitochondrial OS=Homo sapiens OX=9606 GN=LRPPRC PE=1 SV=3	NA	44.4169	32.941	48.5	NA	47.2306	29.8257	26.7537	0.824819	0.404641
IHDVLCK	P42704	Leucine-rich PPR motif-containing protein, mitochondrial OS=Homo sapiens OX=9606 GN=LRPPRC PE=1 SV=3	5.8573	5.1648	8.2521	11.1505	8.3353	13.6622	16.1604	11.5247	1.63297	0.0655795
QLILVLCSEENMQK	P42704	Leucine-rich PPR motif-containing protein, mitochondrial OS=Homo sapiens OX=9606 GN=LRPPRC PE=1 SV=3	3.944	3.1027	3.954	10.346	2.8318	2.7658	3.9475	NA	0.596195	0.333844
AILQENGCLSDSDMFSQAGLR	P42704	Leucine-rich PPR motif-containing protein, mitochondrial OS=Homo sapiens OX=9606 GN=LRPPRC PE=1 SV=3	1.513	2.1018	3.9869	2.6666	1.2739	1.941	1.886	2.8229	0.771676	0.379031
AKYESDMVTGGYAALINLCCR	P42704	Leucine-rich PPR motif-containing protein, mitochondrial OS=Homo sapiens OX=9606 GN=LRPPRC PE=1 SV=3	8.1303	10.6037	7.6556	NA	NA	11.1555	8.2108	9.2663	1.085	0.583658
CVANNQVETLEK	P42704	Leucine-rich PPR motif-containing protein, mitochondrial OS=Homo sapiens OX=9606 GN=LRPPRC PE=1 SV=3	NA	9.23125	4.94365	6.09569	NA	6.06431	7.72253	6.93487	1.02226	0.917745
EECDKYALQSQQR	P42765	3-ketoacyl-CoA thiolase, mitochondrial OS=Homo sapiens OX=9606 GN=ACAA2 PE=1 SV=2	1.23074	2.65098	3.481	2.8158	0.995297	2.75878	3.53905	3.64427	1.07456	0.814528
IVGYFVSGCDPSIMGIGPVPAISGALKK	P42765	3-ketoacyl-CoA thiolase, mitochondrial OS=Homo sapiens OX=9606 GN=ACAA2 PE=1 SV=2	4.6237	1.6112	4.1133	NA	NA	3.1731	3.5539	3.6356	1.00139	0.996177
SGPHCSESIHR	P42785	Lysosomal Pro-X carboxypeptidase OS=Homo sapiens OX=9606 GN=PRCP PE=1 SV=1	0.0633	0.1386	0.1316	0.0425	0.0097	0.1453	0.1274	0.1642	1.18777	0.691424
CRDDSFFGETSHNYHKFDSEYER	P43243	Matrin-3 OS=Homo sapiens OX=9606 GN=MATR3 PE=1 SV=2	5.6045	6.6867	6.7222	4.7197	4.3935	4.04	3.0563	NA	0.645501	0.02432
ECVLPGGETAGDMGK	P43246	DNA mismatch repair protein Msh2 OS=Homo sapiens OX=9606 GN=MSH2 PE=1 SV=1	0.3082	0.3641	0.3081	0.3302	0.2488	0.4942	0.3272	0.3404	1.0763	0.653838
ICANHYITPMMELKPNAGSDR	P43487	Ran-specific GTPase-activating protein OS=Homo sapiens OX=9606 GN=RANBP1 PE=1 SV=1	NA	4.4511	3.4285	5.9388	NA	5.9645	3.7095	3.3178	0.940181	0.814652
AWVWNTHADFADECPKPELLAIR	P43487	Ran-specific GTPase-activating protein OS=Homo sapiens OX=9606 GN=RANBP1 PE=1 SV=1	1.8519	2.3293	1.1832	1.8768	2.5812	2.7718	1.2153	2.1802	1.20816	0.403502
ASSTCPLTFENVK	P45954	Short/branched chain specific acyl-CoA dehydrogenase, mitochondrial OS=Homo sapiens OX=9606 GN=ACADSB PE=1 SV=1	NA	1.62722	1.86924	1.81805	NA	1.86004	1.77483	1.67817	0.999723	0.99593
VGSFCLSEAGAGSDSFALK	P45954	Short/branched chain specific acyl-CoA dehydrogenase, mitochondrial OS=Homo sapiens OX=9606 GN=ACADSB PE=1 SV=1	2.4768	4.2246	5.6793	4.9474	3.2673	NA	5.4025	4.4325	1.00817	0.972065
GILLYGPPGCGK	P46459	Vesicle-fusing ATPase OS=Homo sapiens OX=9606 GN=NSF PE=1 SV=3	NA	0.6133	0.4053	0.6727	0.5303	0.4602	0.5057	0.4312	0.854698	0.311371
QVVEEPSPQLPADRFSPEFVDFTAQCLR	P46734	Dual specificity mitogen-activated protein kinase kinase 3 OS=Homo sapiens OX=9606 GN=MAP2K3 PE=1 SV=2	5.6315	NA	3.8046	2.0201	2.4308	2.6076	3.3327	2.1276	0.687316	0.252467
TMDAGCKPYMAPER	P46734	Dual specificity mitogen-activated protein kinase kinase 3 OS=Homo sapiens OX=9606 GN=MAP2K3 PE=1 SV=2	0.7659	0.5757	0.7633	0.8453	0.9596	2.0871	0.8138	1.2295	1.72531	0.115189
KAQCPIVER	P46782	40S ribosomal protein S5 OS=Homo sapiens OX=9606 GN=RPS5 PE=1 SV=4	0.0603	0.1389	0.1984	0.092	0.1165	0.2717	0.1329	0.1126	1.29432	0.485238
TIAECLADELINAAK	P46782	40S ribosomal protein S5 OS=Homo sapiens OX=9606 GN=RPS5 PE=1 SV=4	0.084	0.0761	0.0666	0.066	0.0965	0.1273	0.0536	0.0554	1.137	0.602369
VNQAIWLLCTGAR	P46782	40S ribosomal protein S5 OS=Homo sapiens OX=9606 GN=RPS5 PE=1 SV=4	2.77082	1.959	2.73397	1.28198	2.43877	2.76842	1.41371	1.12795	0.886012	0.655337
ASCSALMSQPSAPDFVQR	P46939	Utrophin OS=Homo sapiens OX=9606 GN=UTRN PE=1 SV=2	2.0816	3.1615	2.659	2.0659	3.98	3.59	NA	4.5707	1.62396	0.0106179
EVPTTLKECIQEPSSVSQTR	P46939	Utrophin OS=Homo sapiens OX=9606 GN=UTRN PE=1 SV=2	2.0526	1.9657	2.5667	2.2731	2.7812	3.0051	2.5495	3.0251	1.28254	0.0115336
EATDPRPCEVENAVESWR	P47755	F-actin-capping protein subunit alpha-2 OS=Homo sapiens OX=9606 GN=CAPZA2 PE=1 SV=3	6.925	5.6147	5.9597	6.7902	3.3233	4.9069	5.6511	3.2472	0.677294	0.0233322
DKVVGKDYLLCDYNR	P47756	F-actin-capping protein subunit beta OS=Homo sapiens OX=9606 GN=CAPZB PE=1 SV=4	4.4013	3.427	4.7749	3.5745	12.3405	14.4544	5.0511	2.8276	2.1433	0.15217
QMEKDETVSDCSPHIANIGR	P47756	F-actin-capping protein subunit beta OS=Homo sapiens OX=9606 GN=CAPZB PE=1 SV=4	NA	11.6193	9.445	10.6379	9.1983	11.9638	8.5149	8.936	0.913493	0.430028
ICDPYAWLEDPDSEQTK	P48147	Prolyl endopeptidase OS=Homo sapiens OX=9606 GN=PREP PE=1 SV=2	14.755	NA	6.4941	7.2079	4.578	4.1664	4.4736	8.1937	0.564317	0.156625
NTLEWCLPVIDAK	P48444	Coatomer subunit delta OS=Homo sapiens OX=9606 GN=ARCN1 PE=1 SV=1	4.417	2.7134	2.9285	4.1419	2.6916	5.2318	3.6585	2.3863	0.983621	0.942221
IAILTCPFEPPKPK	P48643	T-complex protein 1 subunit epsilon OS=Homo sapiens OX=9606 GN=CCT5 PE=1 SV=1	12.2419	9.9515	11.3747	12.5616	NA	12.9284	11.7983	11.8614	1.05754	0.419982
EMNPALGIDCLHK	P48643	T-complex protein 1 subunit epsilon OS=Homo sapiens OX=9606 GN=CCT5 PE=1 SV=1	2.06209	2.03598	1.72442	2.27257	1.6238	2.15912	3.93826	2.99192	1.32341	0.253314
VCVETVESGAMTK	P48735	Isocitrate dehydrogenase [NADP], mitochondrial OS=Homo sapiens OX=9606 GN=IDH2 PE=1 SV=2	1.0556	9.1896	6.4089	6.7545	0.9082	5.716	8.3062	8.5043	1.00111	0.997972
NILGGTVFREPIICK	P48735	Isocitrate dehydrogenase [NADP], mitochondrial OS=Homo sapiens OX=9606 GN=IDH2 PE=1 SV=2	NA	24.1162	18.2402	17.9596	NA	9.8818	7.0864	6.2749	0.385355	0.00566252
SSGGFVWACK	P48735	Isocitrate dehydrogenase [NADP], mitochondrial OS=Homo sapiens OX=9606 GN=IDH2 PE=1 SV=2	4.3698	4.7326	5.3327	5.2628	5.7638	6.5255	8.3594	NA	1.39769	0.0378816
AYGGSMCAK	P49207	60S ribosomal protein L34 OS=Homo sapiens OX=9606 GN=RPL34 PE=1 SV=3	4.4792	NA	5.5397	6.35	3.4675	11.9145	5.9841	11.3007	1.49675	0.323265
SACGVCPGR	P49207	60S ribosomal protein L34 OS=Homo sapiens OX=9606 GN=RPL34 PE=1 SV=3	NA	44.5027	43.6739	77.1289	12.3844	NA	43.5657	32.465	0.534859	0.147648
YGETANECGEAFFFYGK	P49321	Nuclear autoantigenic sperm protein OS=Homo sapiens OX=9606 GN=NASP PE=1 SV=2	4.61556	5.19706	6.55096	NA	2.28384	2.61369	3.66071	NA	0.523005	0.0212814
KPTDGASSSNCVTDISHLVR	P49321	Nuclear autoantigenic sperm protein OS=Homo sapiens OX=9606 GN=NASP PE=1 SV=2	4.311	6.5844	5.4335	4.5552	5.4289	4.9951	4.3985	5.4319	0.969848	0.791485
CTVFHGAQVEDAFR	P49327	Fatty acid synthase OS=Homo sapiens OX=9606 GN=FASN PE=1 SV=3	0.4365	1.1724	1.4536	1.5005	0.3243	1.0569	1.7191	1.4599	0.999386	0.998629
AFDTAGNGYCR	P49327	Fatty acid synthase OS=Homo sapiens OX=9606 GN=FASN PE=1 SV=3	0.2745	0.9428	0.9709	0.9995	0.2263	0.8944	1.0037	0.9246	0.956489	0.894565
SFYGSTLFLCR	P49327	Fatty acid synthase OS=Homo sapiens OX=9606 GN=FASN PE=1 SV=3	NA	1.7144	1.9128	1.8559	NA	1.5292	2.0836	1.8252	0.991775	0.934047
LGMLSPEGTCK	P49327	Fatty acid synthase OS=Homo sapiens OX=9606 GN=FASN PE=1 SV=3	NA	0.8499	0.9638	0.9521	NA	0.7294	1.0119	0.9939	0.988936	0.922287
AAPLDSIHSLAAYYIDCIR	P49327	Fatty acid synthase OS=Homo sapiens OX=9606 GN=FASN PE=1 SV=3	0.6062	1.7406	1.3328	1.217	0.1547	4.2031	7.3422	1.0377	2.60134	0.280389
TGGAYGEDLGADYNLSQVCDGK	P49327	Fatty acid synthase OS=Homo sapiens OX=9606 GN=FASN PE=1 SV=3	NA	1.2527	1.0617	1.0283	NA	1.1664	1.2308	1.0905	1.04338	0.581984
ALCATRQEPLLIGSTK	P49327	Fatty acid synthase OS=Homo sapiens OX=9606 GN=FASN PE=1 SV=3	NA	1.9375	1.801	1.8974	NA	1.8198	2.0327	1.9529	1.03008	0.48848
GLKPSCTIIPLMK	P49327	Fatty acid synthase OS=Homo sapiens OX=9606 GN=FASN PE=1 SV=3	NA	1.041	0.8048	1.1858	NA	1.057	1.0958	1.1547	1.09101	0.46727
ACLDTAVENMPSLK	P49327	Fatty acid synthase OS=Homo sapiens OX=9606 GN=FASN PE=1 SV=3	NA	1.3063	1.3957	1.4096	NA	1.3044	1.6665	1.4027	1.06372	0.482187
CPPGVVPACHNSK	P49327	Fatty acid synthase OS=Homo sapiens OX=9606 GN=FASN PE=1 SV=3	NA	31.0473	40.2559	36.3049	NA	55.1107	36.7822	35.8763	1.18736	0.379588
CVLLSNLSSTSHVPEVDPGSAELQK	P49327	Fatty acid synthase OS=Homo sapiens OX=9606 GN=FASN PE=1 SV=3	NA	1.3545	1.1233	0.9825	NA	1.4526	2.6997	1.2357	1.55709	0.242428
LSIPTYGLQCTR	P49327	Fatty acid synthase OS=Homo sapiens OX=9606 GN=FASN PE=1 SV=3	NA	13.3902	11.3526	14.2764	NA	9.7501	14.3241	15.4191	1.01215	0.938989
AALQEELQLCK	P49327	Fatty acid synthase OS=Homo sapiens OX=9606 GN=FASN PE=1 SV=3	NA	8.3362	8.9216	9.2528	NA	9.4172	9.733	8.7203	1.0513	0.322151
DGLLENQTPEFFQDVCKPK	P49327	Fatty acid synthase OS=Homo sapiens OX=9606 GN=FASN PE=1 SV=3	1.5088	2.5023	2.288	2.78	1.2545	2.794	2.7281	2.6341	1.03652	0.862257
EACPELDYFVVFSSVSCGR	P49327	Fatty acid synthase OS=Homo sapiens OX=9606 GN=FASN PE=1 SV=3	NA	7.6287	5.7624	7.8877	NA	5.8655	7.2225	7.6467	0.97443	0.842981
ADEASELACPTPK	P49327	Fatty acid synthase OS=Homo sapiens OX=9606 GN=FASN PE=1 SV=3	6.7515	5.75787	5.32181	6.6824	9.63746	10.4754	12.8541	NA	1.79312	0.00304273
ACTILLR	P49368	T-complex protein 1 subunit gamma OS=Homo sapiens OX=9606 GN=CCT3 PE=1 SV=4	NA	3.4417	3.6778	4.3558	NA	3.2628	3.2673	3.9491	0.913196	0.404313
NLQDAMQVCR	P49368	T-complex protein 1 subunit gamma OS=Homo sapiens OX=9606 GN=CCT3 PE=1 SV=4	1.6035	3.4471	3.6878	5.5801	2.1105	2.5797	2.3694	3.5547	0.7413	0.329224
IPGGIIEDSCVLR	P49368	T-complex protein 1 subunit gamma OS=Homo sapiens OX=9606 GN=CCT3 PE=1 SV=4	2.0011	2.13653	4.35872	4.05718	2.05194	2.87994	2.85908	2.77371	0.84157	0.474546
KIGDEYFTFITDCKDPK	P49368	T-complex protein 1 subunit gamma OS=Homo sapiens OX=9606 GN=CCT3 PE=1 SV=4	NA	4.0044	2.2053	3.5433	NA	4.3538	4.3571	3.294	1.23089	0.309329
KGDECELLGHSK	P49411	Elongation factor Tu, mitochondrial OS=Homo sapiens OX=9606 GN=TUFM PE=1 SV=2	NA	3.99298	3.54157	4.22628	NA	5.13879	4.28278	3.46218	1.09548	0.514569
NMITGTAPLDGCILVVAANDGPMPQTR	P49411	Elongation factor Tu, mitochondrial OS=Homo sapiens OX=9606 GN=TUFM PE=1 SV=2	NA	5.4371	4.2331	5.4935	7.1941	4.4983	4.1354	7.2933	1.14357	0.524431
HYAHTDCPGHADYVK	P49411	Elongation factor Tu, mitochondrial OS=Homo sapiens OX=9606 GN=TUFM PE=1 SV=2	25.7852	31.0474	36.6293	29.8974	24.7097	35.7677	26.425	35.0194	0.988347	0.924405
STCTINYSK	P49419	Alpha-aminoadipic semialdehyde dehydrogenase OS=Homo sapiens OX=9606 GN=ALDH7A1 PE=1 SV=5	NA	2.36557	2.28048	3.0436	NA	2.08834	2.74583	2.28536	0.925858	0.573275
GSDCGIVNVNIPTSGAEIGGAFGGEK	P49419	Alpha-aminoadipic semialdehyde dehydrogenase OS=Homo sapiens OX=9606 GN=ALDH7A1 PE=1 SV=5	NA	8.4952	5.5254	6.7267	NA	7.4483	7.3352	4.8752	0.947531	0.778068
GEVITTYCPANNEPIAR	P49419	Alpha-aminoadipic semialdehyde dehydrogenase OS=Homo sapiens OX=9606 GN=ALDH7A1 PE=1 SV=5	0.5134	0.6357	0.7118	0.854	1.12	0.6681	0.4979	0.5773	1.05466	0.820319
IIKPCNHVLSLSFPIRR	P49448	Glutamate dehydrogenase 2, mitochondrial OS=Homo sapiens OX=9606 GN=GLUD2 PE=1 SV=2	0.4376	0.8511	1.5695	1.2528	0.7699	1.1444	0.9205	0.9312	0.916079	0.748927
CAVVDVPFGGAK	P49448	Glutamate dehydrogenase 2, mitochondrial OS=Homo sapiens OX=9606 GN=GLUD2 PE=1 SV=2	0.625	NA	0.9535	0.6561	0.8605	0.7418	0.6603	0.7178	1.00031	0.998242
HSDGNLCVK	P49458	Signal recognition particle 9 kDa protein OS=Homo sapiens OX=9606 GN=SRP9 PE=1 SV=2	7.4019	7.6223	7.2069	8.2662	10.1051	NA	11.2104	9.6413	1.35342	0.00237293
CLSVMEAK	P49588	Alanine--tRNA ligase, cytoplasmic OS=Homo sapiens OX=9606 GN=AARS PE=1 SV=2	16.2581	11.6198	13.4587	NA	9.705	9.1847	9.3546	5.845	0.618507	0.0194613
AVYTQDCPLAAAK	P49588	Alanine--tRNA ligase, cytoplasmic OS=Homo sapiens OX=9606 GN=AARS PE=1 SV=2	1.5501	NA	1.5947	1.1934	1.8501	2.5515	1.3152	1.1534	1.18774	0.515255
NLADCLR	P49721	Proteasome subunit beta type-2 OS=Homo sapiens OX=9606 GN=PSMB2 PE=1 SV=1	6.0754	5.3655	6.3767	6.9632	8.3275	9.3372	7.0286	6.9202	1.27573	0.0422226
LGIGMDTCVIPLR	P49903	Selenide, water dikinase 1 OS=Homo sapiens OX=9606 GN=SEPHS1 PE=1 SV=2	19.2088	21.317	15.583	26.3899	13.4597	11.7288	14.5606	12.1616	0.629231	0.0172893
FLNHSTEHQCMQEFMDK	P50135	Histamine N-methyltransferase OS=Homo sapiens OX=9606 GN=HNMT PE=1 SV=1	1.5147	2.0612	NA	3.9212	1.1407	2.9413	7.181	NA	1.50231	0.551469
VQAQYPGVCINNEVVEPSAEQIAK	P50135	Histamine N-methyltransferase OS=Homo sapiens OX=9606 GN=HNMT PE=1 SV=1	7.1001	7.8263	6.3453	7.269	6.3378	8.1691	NA	7.3361	1.02044	0.808846
EVAESCKDIK	P50213	Isocitrate dehydrogenase [NAD] subunit alpha, mitochondrial OS=Homo sapiens OX=9606 GN=IDH3A PE=1 SV=1	3.7248	9.3781	1.9024	1.5149	4.0704	6.1734	NA	8.112	1.48148	0.437616
MAGCSLSFR	P0DMN0; P50225; P50226	Sulfotransferase 1A1 OS=Homo sapiens OX=9606 GN=SULT1A1 PE=1 SV=3	1.0267	1.6927	2.3586	2.5664	1.2669	1.1269	3.6495	4.1608	1.33485	0.486322
TLETANCMSSQTK	P50416	Carnitine O-palmitoyltransferase 1, liver isoform OS=Homo sapiens OX=9606 GN=CPT1A PE=1 SV=2	3.5133	NA	3.947	2.7442	0.541	0.3457	1.2463	1.8657	0.293892	0.0051019
LLGSTIPLCSAQWER	P50416	Carnitine O-palmitoyltransferase 1, liver isoform OS=Homo sapiens OX=9606 GN=CPT1A PE=1 SV=2	4.9659	2.1074	1.3157	NA	NA	5.5102	1.7129	2.339	1.13984	0.820668
SSKQHYNCEHSK	P50454	Serpin H1 OS=Homo sapiens OX=9606 GN=SERPINH1 PE=1 SV=2	88.41	22.7573	0.2891	NA	84.8581	33.2855	12.5945	15.7521	0.985746	0.986448
MCKQDPSVLHTEEMR	P50502	Hsc70-interacting protein OS=Homo sapiens OX=9606 GN=ST13 PE=1 SV=2	1.3917	2.0014	1.8863	1.4857	0.8769	1.9746	1.7578	1.7555	0.940829	0.737931
VQTDPPSVPICDLYPNGVFPK	P50579	Methionine aminopeptidase 2 OS=Homo sapiens OX=9606 GN=METAP2 PE=1 SV=1	3.1763	4.7162	6.8617	3.0289	3.6887	2.7986	5.8536	4.8536	0.966901	0.89918
CPSPPMINLISVGGQHQGVFGLPR	P50897	Palmitoyl-protein thioesterase 1 OS=Homo sapiens OX=9606 GN=PPT1 PE=1 SV=1	0.5062	0.214	0.1076	NA	0.0674	0.0911	NA	0.0965	0.308045	0.18532
CMQLTDFILK	P50914	60S ribosomal protein L14 OS=Homo sapiens OX=9606 GN=RPL14 PE=1 SV=4	0.436835	0.588117	0.708494	0.468273	0.568637	0.395769	0.63419	NA	0.96809	0.859723
NIQACKELAQTTR	P50990	T-complex protein 1 subunit theta OS=Homo sapiens OX=9606 GN=CCT8 PE=1 SV=4	3.6149	1.5935	1.0415	2.0439	NA	0.6459	1.0959	0.5312	0.365414	0.106853
IAVYSCPFDGMITETK	P50990	T-complex protein 1 subunit theta OS=Homo sapiens OX=9606 GN=CCT8 PE=1 SV=4	16.4349	10.3461	12.0873	17.0182	NA	11.3726	11.6922	12.8593	0.857075	0.357291
QITSYGETCPGLEQYAIK	P50990	T-complex protein 1 subunit theta OS=Homo sapiens OX=9606 GN=CCT8 PE=1 SV=4	2.04331	4.70654	5.34703	2.54531	2.05837	4.95681	4.54993	1.87168	0.917676	0.800842
TGCNVLLIQK	P50991	T-complex protein 1 subunit delta OS=Homo sapiens OX=9606 GN=CCT4 PE=1 SV=4	NA	1.7236	2.3448	2.913	NA	1.7438	1.2845	1.2556	0.613616	0.0761553
TLSGMESYCVR	P50991	T-complex protein 1 subunit delta OS=Homo sapiens OX=9606 GN=CCT4 PE=1 SV=4	0.6321	0.4344	0.6957	0.6656	0.4761	0.6046	0.4143	0.5544	0.844139	0.239275
LGGTIDDCELVEGLVLTQK	P50991	T-complex protein 1 subunit delta OS=Homo sapiens OX=9606 GN=CCT4 PE=1 SV=4	4.266	NA	3.1142	6.8807	3.5867	2.8125	2.2492	4.4744	0.690146	0.235859
LIIVEGCQR	P50993	Sodium/potassium-transporting ATPase subunit alpha-2 OS=Homo sapiens OX=9606 GN=ATP1A2 PE=1 SV=1	11.3285	9.5506	15.4948	15.7795	15.4458	15.5599	14.098	14.47	1.14228	0.286587
NLEAVETLGSTSTICSDK	P50993	Sodium/potassium-transporting ATPase subunit alpha-2 OS=Homo sapiens OX=9606 GN=ATP1A2 PE=1 SV=1	4.98971	5.1107	7.37834	6.69154	4.57498	5.46026	7.68322	8.58159	1.08811	0.647287
ACVVHGSDLK	P50993	Sodium/potassium-transporting ATPase subunit alpha-2 OS=Homo sapiens OX=9606 GN=ATP1A2 PE=1 SV=1	2.62099	4.84982	4.8804	4.20402	3.56035	4.22726	4.0555	3.98611	0.956145	0.75177
EIGPNDGFLAQLCQLNDR	P51452	Dual specificity protein phosphatase 3 OS=Homo sapiens OX=9606 GN=DUSP3 PE=1 SV=1	6.5214	6.5155	4.7295	NA	6.9804	4.7275	5.629	NA	0.975825	0.879402
RQCEEVAR	P51570	Galactokinase OS=Homo sapiens OX=9606 GN=GALK1 PE=1 SV=1	0.7726	0.826	0.6816	0.7764	0.6566	0.3028	0.6582	0.37	0.650265	0.0348136
GHALLIDCR	P51570	Galactokinase OS=Homo sapiens OX=9606 GN=GALK1 PE=1 SV=1	2.3237	2.6536	3.3489	2.0129	3.3162	6.3543	4.3636	5.0362	1.84448	0.0203752
MTGGGFGGCTVTLLEASAAPHAMR	P51570	Galactokinase OS=Homo sapiens OX=9606 GN=GALK1 PE=1 SV=1	NA	13.3434	8.0879	10.1477	9.2605	8.1702	7.1827	7.8714	0.771513	0.141289
NTGQTCVCSNQFLVQR	P51649	Succinate-semialdehyde dehydrogenase, mitochondrial OS=Homo sapiens OX=9606 GN=ALDH5A1 PE=1 SV=2	0.2201	0.44	0.2667	0.3538	NA	0.1423	0.3708	0.4238	0.97548	0.935565
AENGLLMTPCYTANFVAPEVLKR	P51812; Q15418	Ribosomal protein S6 kinase alpha-3 OS=Homo sapiens OX=9606 GN=RPS6KA3 PE=1 SV=1	4.737	3.5879	4.1898	3.7872	4.6639	4.4578	4.0685	4.6846	1.09649	0.225395
VGTGEPCCDWVGDEGAGHFVK	P52209	6-phosphogluconate dehydrogenase, decarboxylating OS=Homo sapiens OX=9606 GN=PGD PE=1 SV=3	NA	81.8425	197.557	234.694	NA	53.3989	492.294	584.494	2.19841	0.294022
CLSSLKDER	P52209	6-phosphogluconate dehydrogenase, decarboxylating OS=Homo sapiens OX=9606 GN=PGD PE=1 SV=3	3.8969	3.6121	3.7696	3.3781	4.1169	4.2736	5.1155	4.5086	1.2291	0.014296
GCGVVKFESPEVAER	P52272	Heterogeneous nuclear ribonucleoprotein M OS=Homo sapiens OX=9606 GN=HNRNPM PE=1 SV=3	1.9743	1.4469	2.3834	2.4655	1.82	1.1956	1.699	2.0269	0.815165	0.239264
ACQIFVR	P52272	Heterogeneous nuclear ribonucleoprotein M OS=Homo sapiens OX=9606 GN=HNRNPM PE=1 SV=3	2.4806	1.9619	3.8687	2.431	1.436	1.0255	2.4323	1.2966	0.576269	0.0684646
SSLSCSLQEGLIPGSQFWDASK	P52701	DNA mismatch repair protein Msh6 OS=Homo sapiens OX=9606 GN=MSH6 PE=1 SV=2	3.318	2.8353	4.2138	6.8763	2.2974	4.9651	1.0961	5.3441	0.794663	0.541951
LGLDPTQEDCVATHR	P52789	Hexokinase-2 OS=Homo sapiens OX=9606 GN=HK2 PE=1 SV=2	0.6038	0.6158	0.5896	0.5168	0.2886	0.2251	0.2666	0.2576	0.446217	1.62947e-05
ILHCLGLAEEIQK	P53004	Biliverdin reductase A OS=Homo sapiens OX=9606 GN=BLVRA PE=1 SV=2	NA	1.1908	1.5873	1.5608	NA	1.3559	1.2068	1.0543	0.833621	0.195012
NCDKGQSFFIDAPDSPATLAYR	P53384	Cytosolic Fe-S cluster assembly factor NUBP1 OS=Homo sapiens OX=9606 GN=NUBP1 PE=1 SV=2	2.1045	2.2448	2.657	2.0416	1.8026	1.7882	2.5339	1.8156	0.877585	0.272899
KPASFMTSICDER	P53396	ATP-citrate synthase OS=Homo sapiens OX=9606 GN=ACLY PE=1 SV=3	24.0863	27.9842	26.6915	22.6685	38.2175	40.8736	NA	23.781	1.35228	0.113818
GVTIIGPATVGGIKPGCFK	P53396	ATP-citrate synthase OS=Homo sapiens OX=9606 GN=ACLY PE=1 SV=3	NA	16.7524	22.5135	19.7668	NA	16.1979	24.1658	21.8988	1.05471	0.728919
FICTTSAIQNR	P53396	ATP-citrate synthase OS=Homo sapiens OX=9606 GN=ACLY PE=1 SV=3	2.1401	1.8742	2.2354	3.907	3.0295	NA	2.6268	4.7354	1.36418	0.283088
LIGPNCPGVINPGECK	P53597	Succinate--CoA ligase [ADP/GDP-forming] subunit alpha, mitochondrial OS=Homo sapiens OX=9606 GN=SUCLG1 PE=1 SV=4	0.1229	0.1861	0.1464	0.2074	0.112	0.1463	0.194	0.1667	0.933917	0.685211
NEMNCKEDQFQLSLLAAMGNTQR	P53618	Coatomer subunit beta OS=Homo sapiens OX=9606 GN=COPB1 PE=1 SV=3	4.5406	6.3754	8.6007	5.5857	4.9052	4.4774	5.3644	7.2302	0.875502	0.486245
VLSECSPLMNDIFNK	P53618	Coatomer subunit beta OS=Homo sapiens OX=9606 GN=COPB1 PE=1 SV=3	7.0286	6.4395	5.8226	6.6195	NA	4.9671	2.8941	4.9357	0.658526	0.0187503
TTYQALPCLPSMYGYPNR	P53621	Coatomer subunit alpha OS=Homo sapiens OX=9606 GN=COPA PE=1 SV=2	2.8079	1.4091	1.9432	1.9646	1.6111	1.61	1.4255	2.193	0.841818	0.372843
SGSKFPVFNMSYNPAENAVLLCTR	P53621	Coatomer subunit alpha OS=Homo sapiens OX=9606 GN=COPA PE=1 SV=2	0.1483	0.0881	0.134	0.2076	0.1853	0.104	0.2001	0.2087	1.20779	0.416302
VQVPNCDEIFYAGTGNLLLR	P53621	Coatomer subunit alpha OS=Homo sapiens OX=9606 GN=COPA PE=1 SV=2	0.0771	0.0444	0.0579	0.2122	1.2581	0.8094	0.2569	0.3612	6.85802	0.04875
GTSPTQIWCNNSQLPVDHILAGSFETAMR	P53621	Coatomer subunit alpha OS=Homo sapiens OX=9606 GN=COPA PE=1 SV=2	NA	0.1123	0.1066	0.1184	NA	0.0807	0.2349	0.2059	1.5461	0.265203
GCPVNTEPSGPTCEKK	P53701	Cytochrome c-type heme lyase OS=Homo sapiens OX=9606 GN=HCCS PE=1 SV=1	1.7379	2.7532	2.1394	1.6728	1.6133	1.2085	2.4465	2.3343	0.915612	0.665841
ACLDYPVTSVLPPASLCK	P53801	Pituitary tumor-transforming gene 1 protein-interacting protein OS=Homo sapiens OX=9606 GN=PTTG1IP PE=1 SV=1	1.567	2.1226	0.9028	2.5003	2.4594	1.101	0.7387	0.9195	0.735771	0.405654
LQSEVAELKIVADQLCAK	P53990	IST1 homolog OS=Homo sapiens OX=9606 GN=IST1 PE=1 SV=1	30.3472	17.1768	NA	16.5544	17.6858	10.7052	10.4079	17.4588	0.658463	0.162993
FGDYQCNSAMGISQMLK	P54136	Arginine--tRNA ligase, cytoplasmic OS=Homo sapiens OX=9606 GN=RARS PE=1 SV=2	NA	0.4132	0.5965	0.4703	NA	0.3184	0.3141	0.3766	0.681824	0.0531771
IVFVPGCSIPLTIVK	P54136	Arginine--tRNA ligase, cytoplasmic OS=Homo sapiens OX=9606 GN=RARS PE=1 SV=2	NA	12.5729	13.7243	9.7637	NA	10.7711	10.4534	11.3059	0.902096	0.383074
NCGCLGASPNLEQLQEENLKLK	P54136	Arginine--tRNA ligase, cytoplasmic OS=Homo sapiens OX=9606 GN=RARS PE=1 SV=2	14.2963	NA	15.2762	16.7263	20.0102	11.2553	7.5965	NA	0.839374	0.544698
AFCEPGNVENNGVLSFIK	P54577	Tyrosine--tRNA ligase, cytoplasmic OS=Homo sapiens OX=9606 GN=YARS PE=1 SV=4	2.1315	3.3298	4.3373	4.168	1.85	2.7817	3.1965	5.428	0.949136	0.851859
GEQGQYLQQDANECWIQMMR	P54578	Ubiquitin carboxyl-terminal hydrolase 14 OS=Homo sapiens OX=9606 GN=USP14 PE=1 SV=3	2.0457	3.4763	3.0604	3.6514	2.1781	3.1948	3.8812	3.8267	1.06923	0.705888
IDCVSKNEDIPNVAVYPHNGMIDLK	P54709	Sodium/potassium-transporting ATPase subunit beta-3 OS=Homo sapiens OX=9606 GN=ATP1B3 PE=1 SV=1	0.1756	0.2609	0.1886	0.2049	0.2012	0.2439	0.1855	0.25	1.06096	0.625151
GIPVMGHSEGICHMYVDSEASVDKVTR	P54886	Delta-1-pyrroline-5-carboxylate synthase OS=Homo sapiens OX=9606 GN=ALDH18A1 PE=1 SV=2	NA	2.9015	2.9189	3.1823	NA	2.5774	3.9496	2.9054	1.04773	0.752248
CEYPAACNALETLLIHR	P54886	Delta-1-pyrroline-5-carboxylate synthase OS=Homo sapiens OX=9606 GN=ALDH18A1 PE=1 SV=2	1.46656	1.54723	1.27104	2.7358	1.39496	1.34853	1.16438	1.23853	0.733038	0.212697
LGSAVVTRGDECGLALGR	P54886	Delta-1-pyrroline-5-carboxylate synthase OS=Homo sapiens OX=9606 GN=ALDH18A1 PE=1 SV=2	3.68772	3.83476	3.41825	3.84009	3.53161	4.12911	4.22053	3.42488	1.03554	0.582158
NLFEDQNTLTSICEK	P55060	Exportin-2 OS=Homo sapiens OX=9606 GN=CSE1L PE=1 SV=3	0.6153	0.6498	1.4843	0.7821	NA	0.864	0.6381	0.4347	0.731247	0.407262
AACDLVR	P55060	Exportin-2 OS=Homo sapiens OX=9606 GN=CSE1L PE=1 SV=3	1.9888	1.4372	1.884	1.5402	2.3801	1.4187	1.2888	1.1556	0.911389	0.640094
LGDVISIQPCPDVK	P55072	Transitional endoplasmic reticulum ATPase OS=Homo sapiens OX=9606 GN=VCP PE=1 SV=4	6.4747	3.9232	8.1725	7.4238	8.6394	13.0582	3.9908	2.6298	1.0894	0.827094
MTNGFSGADLTEICQR	P55072	Transitional endoplasmic reticulum ATPase OS=Homo sapiens OX=9606 GN=VCP PE=1 SV=4	0.625	0.4852	0.6376	0.5153	0.3568	0.4166	0.4674	0.4395	0.742477	0.0177946
QAAPCVLFFDELDSIAK	P55072	Transitional endoplasmic reticulum ATPase OS=Homo sapiens OX=9606 GN=VCP PE=1 SV=4	NA	4.885	5.0409	4.7569	3.1394	3.5783	2.5829	4.6453	0.712359	0.0427374
GVLFYGPPGCGK	P55072	Transitional endoplasmic reticulum ATPase OS=Homo sapiens OX=9606 GN=VCP PE=1 SV=4	9.9882	6.4472	7.2638	8.3257	6.1839	8.5955	10.6022	12.3315	1.17762	0.388108
FGMTPSKGVLFYGPPGCGK	P55072	Transitional endoplasmic reticulum ATPase OS=Homo sapiens OX=9606 GN=VCP PE=1 SV=4	9.4536	8.1598	8.5689	4.1987	7.3183	9.6056	8.0193	3.1612	0.925065	0.762683
VRLGDVISIQPCPDVK	P55072	Transitional endoplasmic reticulum ATPase OS=Homo sapiens OX=9606 GN=VCP PE=1 SV=4	4.6825	2.8105	5.5707	4.3978	NA	5.3192	3.0399	3.8557	0.932703	0.752083
VGLPPLEKFNNWGGSLSLGHPFGATGCR	P55084	Trifunctional enzyme subunit beta, mitochondrial OS=Homo sapiens OX=9606 GN=HADHB PE=1 SV=3	NA	2.58538	2.26593	3.48757	NA	1.91534	1.7022	2.29374	0.708881	0.116129
EGGQYGLVAACAAGGQGHAMIVEAYPK	P55084	Trifunctional enzyme subunit beta, mitochondrial OS=Homo sapiens OX=9606 GN=HADHB PE=1 SV=3	1.09939	2.434	2.52049	1.96997	1.13981	2.41408	2.13162	2.5742	1.02939	0.901681
SPVTTLLECMHK	P55265	Double-stranded RNA-specific adenosine deaminase OS=Homo sapiens OX=9606 GN=ADAR PE=1 SV=4	12.4227	22.7682	11.1594	17.0777	17.6173	NA	19.6054	13.9907	1.07657	0.7359
VFIWTCDDASSNTWSPK	P55735	Protein SEC13 homolog OS=Homo sapiens OX=9606 GN=SEC13 PE=1 SV=3	3.3748	3.658	5.1585	5.2081	3.3718	5.5257	5.376	NA	1.09379	0.638467
FASGGCDNLIK	P55735	Protein SEC13 homolog OS=Homo sapiens OX=9606 GN=SEC13 PE=1 SV=3	14.3549	13.9537	13.7674	19.0842	16.2648	16.3589	12.5824	11.3476	0.924681	0.546725
LLDLVQQSCNYK	P55769	NHP2-like protein 1 OS=Homo sapiens OX=9606 GN=SNU13 PE=1 SV=3	16.4217	19.2297	23.5058	24.9114	18.0822	29.387	39.0782	NA	1.37265	0.219131
KFCAGGSYVGEDCPQWMVPITISTSEDPNQAK	P55786	Puromycin-sensitive aminopeptidase OS=Homo sapiens OX=9606 GN=NPEPPS PE=1 SV=2	NA	0.162	0.0913	0.2336	0.1912	0.2164	0.2574	0.221	1.36476	0.179714
LRQWNTLYLCGTDEYGTATETK	P56192	Methionine--tRNA ligase, cytoplasmic OS=Homo sapiens OX=9606 GN=MARS PE=1 SV=2	2.4355	4.0836	3.9027	2.997	3.5017	2.4399	2.3161	2.2045	0.779667	0.182037
ASFENNCEIGCFAK	P56537	Eukaryotic translation initiation factor 6 OS=Homo sapiens OX=9606 GN=EIF6 PE=1 SV=1	NA	11.1337	11.3444	13.5326	8.219	9.0924	7.8994	NA	0.700092	0.0130901
IIYGGSVTGATCK	P60174	Triosephosphate isomerase OS=Homo sapiens OX=9606 GN=TPI1 PE=1 SV=3	2.3973	3.4108	5.1146	4.7156	5.7245	3.5492	2.1037	4.7258	1.02973	0.911026
VVMALGDYMGASCHACIGGTNVR	P60842	Eukaryotic initiation factor 4A-I OS=Homo sapiens OX=9606 GN=EIF4A1 PE=1 SV=1	2.0565	3.7999	3.5243	5.3874	2.1579	2.7331	3.3852	3.7931	0.817255	0.415552
INNACFEAVVVTNTIPQEDKMK	P60891	Ribose-phosphate pyrophosphokinase 1 OS=Homo sapiens OX=9606 GN=PRPS1 PE=1 SV=2	NA	0.7989	0.9268	0.5579	0.2928	0.5742	1.4843	1.2395	1.17932	0.706157
WVPEITHHCPK	P60953	Cell division control protein 42 homolog OS=Homo sapiens OX=9606 GN=CDC42 PE=1 SV=2	3.731	5.6095	4.3096	6.1142	4.5839	6.5841	4.0565	6.0501	1.07642	0.659188
CSTPEEIKKR	P60981	Destrin OS=Homo sapiens OX=9606 GN=DSTN PE=1 SV=3	9.1083	7.4032	4.5446	3.4616	6.3353	2.8519	5.8679	7.4269	0.91697	0.76452
HECQANGPEDLNR	P60981	Destrin OS=Homo sapiens OX=9606 GN=DSTN PE=1 SV=3	3.2579	5.3963	8.3641	6.1604	4.1179	4.6812	4.6279	4.4338	0.77057	0.257058
FQGIKHECQANGPEDLNR	P60981	Destrin OS=Homo sapiens OX=9606 GN=DSTN PE=1 SV=3	4.489	5.8827	6.2727	7.0844	5.1861	7.1334	7.0033	7.5636	1.13307	0.33618
LGYAGNTEPQFIIPSCIAIK	P61158	Actin-related protein 3 OS=Homo sapiens OX=9606 GN=ACTR3 PE=1 SV=3	3.7687	3.8887	4.371	4.1932	2.6455	3.3364	3.5259	3.4826	0.800809	0.0170036
NCLTNFHGMDLTR	P61247	40S ribosomal protein S3a OS=Homo sapiens OX=9606 GN=RPS3A PE=1 SV=2	0.1895	0.2378	0.3711	0.0968	0.2167	0.4901	0.1017	0.1393	1.05876	0.904145
DKMCSMVK	P61247	40S ribosomal protein S3a OS=Homo sapiens OX=9606 GN=RPS3A PE=1 SV=2	2.7472	3.6733	1.5426	2.4693	2.0325	5.5855	2.5869	2.9944	1.26522	0.471747
ACQSIYPLHDVFVR	P61247	40S ribosomal protein S3a OS=Homo sapiens OX=9606 GN=RPS3A PE=1 SV=2	0.278856	0.311746	0.371391	0.370378	0.181612	0.171584	0.203527	0.198286	0.566665	0.000951599
LDECEEAFQGTK	P61289	Proteasome activator complex subunit 3 OS=Homo sapiens OX=9606 GN=PSME3 PE=1 SV=1	14.1411	14.0267	9.1452	8.53283	10.3056	12.4097	9.14833	9.22324	0.896195	0.509971
AVVHGILMGVPVPFPIPEPDGCK	P61916	NPC intracellular cholesterol transporter 2 OS=Homo sapiens OX=9606 GN=NPC2 PE=1 SV=1	0.2132	NA	0.1633	0.197	NA	0.1319	0.1074	0.1981	0.762685	0.214997
IQHSITAQDHQPTPDSCIISMVVGQLK	P61970	Nuclear transport factor 2 OS=Homo sapiens OX=9606 GN=NUTF2 PE=1 SV=1	3.1793	3.0965	3.1806	5.335	2.4343	4.2679	5.0582	5.151	1.14333	0.548372
GSDFDCELR	P61978	Heterogeneous nuclear ribonucleoprotein K OS=Homo sapiens OX=9606 GN=HNRNPK PE=1 SV=1	NA	1.5651	2.6394	2.7954	NA	1.3778	1.8005	2.0334	0.744539	0.239506
IIPTLEEGLQLPSPTATSQLPLESDAVECLNYQHYK	P61978	Heterogeneous nuclear ribonucleoprotein K OS=Homo sapiens OX=9606 GN=HNRNPK PE=1 SV=1	2.4602	2.4545	2.7006	2.2537	2.6695	2.4453	2.2888	2.2094	0.97406	0.655728
LFQECCPHSTDR	P61978	Heterogeneous nuclear ribonucleoprotein K OS=Homo sapiens OX=9606 GN=HNRNPK PE=1 SV=1	NA	4.1412	5.7964	5.1735	NA	4.3255	8.8516	9.9673	1.53162	0.209251
NCSETQYESK	P61981	14-3-3 protein gamma OS=Homo sapiens OX=9606 GN=YWHAG PE=1 SV=2	10.5417	61.291	19.836	16.1283	10.7606	134.597	13.1396	27.7278	1.72755	0.559934
GNHECASINR	P62136; P36873; P62140	Serine/threonine-protein phosphatase PP1-beta catalytic subunit OS=Homo sapiens OX=9606 GN=PPP1CB PE=1 SV=3	NA	2.6668	3.4166	3.2328	1.7467	1.803	3.3178	3.3989	0.826496	0.390504
AVAHHTDCTFIR	P62195	26S proteasome regulatory subunit 8 OS=Homo sapiens OX=9606 GN=PSMC5 PE=1 SV=1	6.0844	5.8299	4.7671	6.4238	7.0115	5.9435	7.4031	7.6449	1.21198	0.0562833
LLACIASRPGQCGR	P62241	40S ribosomal protein S8 OS=Homo sapiens OX=9606 GN=RPS8 PE=1 SV=2	0.3335	0.5822	0.6792	0.3844	0.3441	0.4926	0.4038	0.3767	0.817057	0.341133
TATAVAHCK	P62249	40S ribosomal protein S16 OS=Homo sapiens OX=9606 GN=RPS16 PE=1 SV=2	0.0433937	0.0371458	0.0597385	0.0348689	0.0508178	0.0669236	0.0607311	0.0391671	1.24261	0.246141
CKELGITALHIK	P62263	40S ribosomal protein S14 OS=Homo sapiens OX=9606 GN=RPS14 PE=1 SV=3	0.0447	0.2571	0.15	0.0602	0.0944	0.33	0.0744	0.0626	1.09648	0.882648
CPFTGNVSIR	P62280	40S ribosomal protein S11 OS=Homo sapiens OX=9606 GN=RPS11 PE=1 SV=3	0.241	0.3721	0.3556	0.1898	0.373	0.6624	0.2491	0.332	1.39534	0.296538
DHQPCIIFMDEIDAIGGR	P62333	26S proteasome regulatory subunit 10B OS=Homo sapiens OX=9606 GN=PSMC6 PE=1 SV=1	3.0033	3.0247	3.4989	3.1311	2.5721	3.3045	2.6396	2.4825	0.868913	0.108445
CGETGHVAINCSK	P62633	Cellular nucleic acid-binding protein OS=Homo sapiens OX=9606 GN=CNBP PE=1 SV=1	NA	3.0723	3.2765	2.8034	2.1301	2.8802	3.1543	3.922	0.990467	0.951253
CGESGHLAK	P62633	Cellular nucleic acid-binding protein OS=Homo sapiens OX=9606 GN=CNBP PE=1 SV=1	0.5075	0.8564	0.9901	0.6497	0.5026	0.8383	0.7277	0.8532	0.972734	0.883828
TSEVNCYR	P62633	Cellular nucleic acid-binding protein OS=Homo sapiens OX=9606 GN=CNBP PE=1 SV=1	NA	3.0708	1.7677	2.679	1.8297	NA	1.4946	3.8703	0.957047	0.903855
ECLPLIIFLR	P62701	40S ribosomal protein S4, X isoform OS=Homo sapiens OX=9606 GN=RPS4X PE=1 SV=2	0.8788	1.3388	0.8531	1.6358	0.8518	0.8408	0.7259	NA	0.685152	0.163051
MKLNISFPATGCQK	P62753	40S ribosomal protein S6 OS=Homo sapiens OX=9606 GN=RPS6 PE=1 SV=1	1.2162	1.7154	1.856	1.6607	1.4198	2.345	1.5114	1.5891	1.06467	0.695078
LLVGNKCDLTTK	P62820	Ras-related protein Rab-1A OS=Homo sapiens OX=9606 GN=RAB1A PE=1 SV=3	7.2702	NA	8.0987	8.0242	7.9996	NA	7.9443	8.5821	1.04843	0.321578
ISLGLPVGAVINCADNTGAK	P62829	60S ribosomal protein L23 OS=Homo sapiens OX=9606 GN=RPL23 PE=1 SV=1	0.7712	0.9505	0.9764	0.8717	0.7318	1.4279	0.7227	0.8423	1.04339	0.831282
ECADLWPR	P62829	60S ribosomal protein L23 OS=Homo sapiens OX=9606 GN=RPL23 PE=1 SV=1	0.645	1.0585	1.0154	0.592	0.7259	1.3509	0.7165	0.9242	1.12281	0.615319
ATYDKLCK	P62851	40S ribosomal protein S25 OS=Homo sapiens OX=9606 GN=RPS25 PE=1 SV=1	NA	6.8078	8.5262	11.5075	NA	8.2381	8.5574	7.3406	0.899208	0.560003
VCTLAIIDPGDSDIIR	P62888	60S ribosomal protein L30 OS=Homo sapiens OX=9606 GN=RPL30 PE=1 SV=2	0.481	0.7613	1.0727	0.6967	0.2068	0.4084	0.3375	0.4314	0.459574	0.0217912
FSVCVLGDQQHCDEAK	P62906	60S ribosomal protein L10a OS=Homo sapiens OX=9606 GN=RPL10A PE=1 SV=2	0.018	0.2005	0.2831	0.2908	0.0438	0.1994	0.0996	0.0976	0.55578	0.262888
SYCAEIAHNVSSK	P62910	60S ribosomal protein L32 OS=Homo sapiens OX=9606 GN=RPL32 PE=1 SV=2	0.1471	0.1297	0.2005	0.1138	0.0708	0.219	0.1347	0.1548	0.980037	0.93714
HTGPGILSMANAGPNTNGSQFFICTAK	P62937	Peptidyl-prolyl cis-trans isomerase A OS=Homo sapiens OX=9606 GN=PPIA PE=1 SV=2	2.2019	3.0994	2.9682	2.9734	2.8601	3.2732	2.636	2.9065	1.0385	0.672919
GFGYKGSCFHR	P62937	Peptidyl-prolyl cis-trans isomerase A OS=Homo sapiens OX=9606 GN=PPIA PE=1 SV=2	17.7342	18.7205	26.8028	23.1162	NA	16.6103	8.54432	10.311	0.547476	0.0287503
CCLTYCFNKPEDK	P62979	Ubiquitin-40S ribosomal protein S27a OS=Homo sapiens OX=9606 GN=RPS27A PE=1 SV=2	NA	2.8237	5.6208	5.7499	NA	1.6145	6.3351	5.4556	0.944401	0.886856
GACHGQTGMFPR	P62993	Growth factor receptor-bound protein 2 OS=Homo sapiens OX=9606 GN=GRB2 PE=1 SV=1	2.2235	3.7611	2.2515	3.1016	3.4124	6.1212	4.3918	3.0776	1.49969	0.118076
LAEQAERYDDMAACMK	P63104	14-3-3 protein zeta/delta OS=Homo sapiens OX=9606 GN=YWHAZ PE=1 SV=1	3.7138	4.2437	2.7613	4.4884	2.6528	3.0445	2.9109	2.5643	0.734685	0.0446312
NADMSEEMQQDSVECATQALEK	P63167	Dynein light chain 1, cytoplasmic OS=Homo sapiens OX=9606 GN=DYNLL1 PE=1 SV=1	NA	1.1093	1.1305	2.9801	NA	1.7365	1.2175	2.4317	1.03176	0.941931
YNPTWHCIVGR	P63167	Dynein light chain 1, cytoplasmic OS=Homo sapiens OX=9606 GN=DYNLL1 PE=1 SV=1	NA	2.6741	4.3138	5.456	2.666	3.9297	2.283	3.3187	0.735143	0.228298
VWNLANCK	P63244	Receptor of activated protein C kinase 1 OS=Homo sapiens OX=9606 GN=RACK1 PE=1 SV=3	0.552	0.5973	0.538	0.5699	0.5893	0.7651	0.6754	0.6938	1.20663	0.0227693
YTVQDESHSEWVSCVR	P63244	Receptor of activated protein C kinase 1 OS=Homo sapiens OX=9606 GN=RACK1 PE=1 SV=3	0.114	0.0255	0.1741	0.0315	NA	0.0562	0.0998	0.0198	0.679223	0.576159
LWNTLGVCK	P63244	Receptor of activated protein C kinase 1 OS=Homo sapiens OX=9606 GN=RACK1 PE=1 SV=3	NA	4.5569	3.2919	4.6054	1.9564	3.9261	3.7932	3.3949	0.78712	0.228322
HLYTLDGGDIINALCFSPNR	P63244	Receptor of activated protein C kinase 1 OS=Homo sapiens OX=9606 GN=RACK1 PE=1 SV=3	0.1348	0.1918	0.1053	0.135	0.2561	0.1264	NA	0.0794	1.08638	0.813096
FSPNSSNPIIVSCGWDK	P63244	Receptor of activated protein C kinase 1 OS=Homo sapiens OX=9606 GN=RACK1 PE=1 SV=3	0.249186	0.215408	0.164195	0.283745	0.57764	0.147143	0.215011	0.182057	1.22938	0.63025
TNHIGHTGYLNTVTVSPDGSLCASGGK	P63244	Receptor of activated protein C kinase 1 OS=Homo sapiens OX=9606 GN=RACK1 PE=1 SV=3	0.0460326	NA	0.0523474	0.0227895	0.0336884	NA	0.0393662	0.0314728	0.862654	0.582549
LCYVALDFEQEMATAASSSSLEK	P63261; P60709	Actin, cytoplasmic 2 OS=Homo sapiens OX=9606 GN=ACTG1 PE=1 SV=1	NA	1.65022	1.9028	1.86787	NA	1.87636	1.81782	1.70446	0.995897	0.940761
CPEALFQPSFLGMESCGIHETTFNSIMK	P63261	Actin, cytoplasmic 2 OS=Homo sapiens OX=9606 GN=ACTG1 PE=1 SV=1	NA	7.22297	8.51736	7.85579	NA	8.19491	8.24243	7.45764	1.01267	0.836309
EKLCYVALDFEQEMATAASSSSLEK	Q6S8J3; P63261	Actin, cytoplasmic 2 OS=Homo sapiens OX=9606 GN=ACTG1 PE=1 SV=1	NA	1.7122	1.6673	1.8774	NA	1.6677	1.8167	1.5181	0.951606	0.473517
CDVDIRK	Q562R1; P63261	Actin, cytoplasmic 2 OS=Homo sapiens OX=9606 GN=ACTG1 PE=1 SV=1	NA	1.92024	2.19958	2.10791	NA	2.15797	2.25385	1.97935	1.02624	0.660434
GQVCLPVISAENWKPATK	P68036	Ubiquitin-conjugating enzyme E2 L3 OS=Homo sapiens OX=9606 GN=UBE2L3 PE=1 SV=1	4.1456	4.0209	NA	3.9041	5.1701	3.4171	NA	5.743	1.1872	0.344394
KDGNASGTTLLEALDCILPPTRPTDKPLR	P68104	Elongation factor 1-alpha 1 OS=Homo sapiens OX=9606 GN=EEF1A1 PE=1 SV=1	NA	0.6254	0.6899	0.9654	NA	0.4401	0.6147	0.611	0.73039	0.160394
SGDAAIVDMVPGKPMCVESFSDYPPLGR	P68104	Elongation factor 1-alpha 1 OS=Homo sapiens OX=9606 GN=EEF1A1 PE=1 SV=1	NA	1.1667	1.2676	1.2462	NA	1.0016	0.9895	1.1419	0.851243	0.0341647
YMACCLLYRGDVVPK	Q71U36; Q9BQE3; P68366	Tubulin alpha-4A chain OS=Homo sapiens OX=9606 GN=TUBA4A PE=1 SV=1	8.3	NA	10.54	12.74	14.71	18.36	21.17	16.01	1.66838	0.0167423
AVCMLSNTTAIAEAWAR	Q71U36; P68366	Tubulin alpha-4A chain OS=Homo sapiens OX=9606 GN=TUBA4A PE=1 SV=1	15.2556	16.4451	16.7738	15.5614	11.8534	15.8477	14.5576	10.8818	0.829855	0.0652584
AYHEQLSVAEITNACFEPANQMVK	Q71U36; P68366	Tubulin alpha-4A chain OS=Homo sapiens OX=9606 GN=TUBA4A PE=1 SV=1	4.8015	6.2111	6.1979	6.1704	6.1152	6.2854	6.1897	5.865	1.04595	0.483157
SIQFVDWCPTGFK	P68366	Tubulin alpha-4A chain OS=Homo sapiens OX=9606 GN=TUBA4A PE=1 SV=1	26.5036	25.3901	24.1228	24.0386	NA	29.7651	35.1117	24.917	1.2	0.112648
KRVPDHHPC	P78371	T-complex protein 1 subunit beta OS=Homo sapiens OX=9606 GN=CCT2 PE=1 SV=4	14.5909	14.3019	22.0599	NA	NA	13.5451	18.2969	14.0222	0.900133	0.596657
SLHDALCVLAQTVK	P78371	T-complex protein 1 subunit beta OS=Homo sapiens OX=9606 GN=CCT2 PE=1 SV=4	NA	1.35995	1.37166	2.25595	1.57017	1.74864	0.72324	1.91554	0.895867	0.683101
LLPDDPYEKACQK	P78417	Glutathione S-transferase omega-1 OS=Homo sapiens OX=9606 GN=GSTO1 PE=1 SV=2	3.8395	3.1224	2.0393	1.9163	6.2596	5.2403	2.5445	3.482	1.60535	0.134756
LNECVDHTPK	P78417	Glutathione S-transferase omega-1 OS=Homo sapiens OX=9606 GN=GSTO1 PE=1 SV=2	2.54567	2.57457	2.83367	2.0589	2.33594	2.40088	2.42912	2.01609	0.917029	0.310566
CGAALAGHQLIR	P78527	DNA-dependent protein kinase catalytic subunit OS=Homo sapiens OX=9606 GN=PRKDC PE=1 SV=3	0.4093	0.3994	0.8323	0.8617	0.817	NA	0.6816	0.7332	1.18901	0.479746
CFGTGAAGNR	P78527	DNA-dependent protein kinase catalytic subunit OS=Homo sapiens OX=9606 GN=PRKDC PE=1 SV=3	3.304	2.7463	5.4152	3.1912	3.5596	3.0651	4.9157	3.2318	1.00788	0.969701
IIANALSSEPACLAEIEEDKAR	P78527	DNA-dependent protein kinase catalytic subunit OS=Homo sapiens OX=9606 GN=PRKDC PE=1 SV=3	0.3246	0.2117	0.1759	0.1967	0.219	0.1427	0.305	0.161	0.910661	0.695411
APPCEYKDWLTK	P78527	DNA-dependent protein kinase catalytic subunit OS=Homo sapiens OX=9606 GN=PRKDC PE=1 SV=3	0.4512	0.4048	0.4745	0.2784	0.4012	0.3537	0.4065	0.4651	1.01094	0.931841
DILPCLDGYLK	P78527	DNA-dependent protein kinase catalytic subunit OS=Homo sapiens OX=9606 GN=PRKDC PE=1 SV=3	NA	5.9947	8.3919	12.1591	NA	11.8475	10.6995	10.6429	1.25029	0.294292
GLSSLLCNFTK	P78527	DNA-dependent protein kinase catalytic subunit OS=Homo sapiens OX=9606 GN=PRKDC PE=1 SV=3	NA	1.6338	1.1731	1.6838	1.07	1.3047	1.4033	NA	0.841294	0.279847
LPVLAGCLK	P78527	DNA-dependent protein kinase catalytic subunit OS=Homo sapiens OX=9606 GN=PRKDC PE=1 SV=3	2.7848	3.8638	3.1583	3.4317	1.0979	2.2624	2.952	2.5077	0.666234	0.0518156
NILEESLCELVAK	P78527	DNA-dependent protein kinase catalytic subunit OS=Homo sapiens OX=9606 GN=PRKDC PE=1 SV=3	2.2505	2.2884	2.2268	1.8351	2.0509	1.5331	1.8622	1.2008	0.772835	0.0635515
ELLNPVVEFVSHPSTTCR	P78527	DNA-dependent protein kinase catalytic subunit OS=Homo sapiens OX=9606 GN=PRKDC PE=1 SV=3	0.0926	0.2654	0.3507	0.3301	0.1763	0.2001	0.3748	0.3265	1.03745	0.902165
QCLPSLDLSCK	P78527	DNA-dependent protein kinase catalytic subunit OS=Homo sapiens OX=9606 GN=PRKDC PE=1 SV=3	4.1046	5.1143	5.556	4.4275	NA	5.5288	2.5372	6.3322	0.99975	0.999125
GMSQLITMACGSCSNENALK	P80404	4-aminobutyrate aminotransferase, mitochondrial OS=Homo sapiens OX=9606 GN=ABAT PE=1 SV=3	2.5277	2.5432	2.5094	3.2758	2.8557	3.2467	5.4931	5.2902	1.55541	0.0769453
MKVELCSFSGYK	P83731	60S ribosomal protein L24 OS=Homo sapiens OX=9606 GN=RPL24 PE=1 SV=1	1.3724	1.2674	1.5266	1.0369	1.1332	3.0897	0.9901	1.0844	1.21027	0.615307
GWAPTFLGYSMQGLCK	Q00325	Phosphate carrier protein, mitochondrial OS=Homo sapiens OX=9606 GN=SLC25A3 PE=1 SV=2	2.7026	2.8629	5.434	6.2972	5.8817	6.7959	6.3638	5.9374	1.44414	0.0850974
GAKDCVEAAK	Q00341	Vigilin OS=Homo sapiens OX=9606 GN=HDLBP PE=1 SV=2	NA	44.9292	23.6679	34.8005	NA	30.2797	24.8472	26.1442	0.786006	0.310334
WLKEDKLECSEELGDLVK	Q00610	Clathrin heavy chain 1 OS=Homo sapiens OX=9606 GN=CLTC PE=1 SV=5	2.5605	2.8676	2.3133	2.2493	1.7051	2.0822	1.7377	1.1103	0.664148	0.0142686
ANVPNKVIQCFAETGQVQK	Q00610	Clathrin heavy chain 1 OS=Homo sapiens OX=9606 GN=CLTC PE=1 SV=5	5.4571	NA	2.8976	3.0637	3.167	4.1859	3.1803	4.3419	0.977048	0.915889
ESNCYDPERVK	Q00610	Clathrin heavy chain 1 OS=Homo sapiens OX=9606 GN=CLTC PE=1 SV=5	8.2713	7.8533	2.6478	5.1731	NA	2.4031	6.9787	6.3352	0.875154	0.718055
IHEGCEEPATHNALAK	Q00610	Clathrin heavy chain 1 OS=Homo sapiens OX=9606 GN=CLTC PE=1 SV=5	2.866	NA	2.8034	3.0693	5.4215	3.943	1.8038	2.3198	1.15762	0.65722
NCMTDLLAKLEAK	Q00765	Receptor expression-enhancing protein 5 OS=Homo sapiens OX=9606 GN=REEP5 PE=1 SV=3	5.4176	NA	2.9151	5.0417	4.2656	3.704	5.3351	6.7612	1.12524	0.610669
GNFTLPEVAECFDEITYVELQKEEAQK	Q00839	Heterogeneous nuclear ribonucleoprotein U OS=Homo sapiens OX=9606 GN=HNRNPU PE=1 SV=6	3.3102	4.0444	4.5704	4.6633	3.813	4.7381	4.6303	5.1335	1.10409	0.339667
KDCEVVMMIGLPGAGK	Q00839	Heterogeneous nuclear ribonucleoprotein U OS=Homo sapiens OX=9606 GN=HNRNPU PE=1 SV=6	3.6844	4.61311	3.47444	5.07163	2.37582	4.18334	2.88871	3.99529	0.798118	0.191059
MCLFAGFQR	Q00839	Heterogeneous nuclear ribonucleoprotein U OS=Homo sapiens OX=9606 GN=HNRNPU PE=1 SV=6	7.63488	7.114	5.52126	4.66845	7.6367	4.43212	NA	7.56731	1.04984	0.806416
APQCLGK	Q00839	Heterogeneous nuclear ribonucleoprotein U OS=Homo sapiens OX=9606 GN=HNRNPU PE=1 SV=6	4.85229	4.62982	5.25846	3.31914	3.26994	2.29511	3.49524	3.71302	0.707282	0.0448942
AVVVCPKDEDYKQR	Q00839	Heterogeneous nuclear ribonucleoprotein U OS=Homo sapiens OX=9606 GN=HNRNPU PE=1 SV=6	1.47447	2.27224	2.50352	2.51315	1.64675	1.93465	2.59952	2.88496	1.03452	0.847795
FATDGEGYKPCDPQVIR	Q01082	Spectrin beta chain, non-erythrocytic 1 OS=Homo sapiens OX=9606 GN=SPTBN1 PE=1 SV=2	0.3183	0.4638	1.9205	2.7216	0.4718	0.5031	2.0288	2.1671	0.953283	0.935
IHCLENVDK	Q01082	Spectrin beta chain, non-erythrocytic 1 OS=Homo sapiens OX=9606 GN=SPTBN1 PE=1 SV=2	0.5062	0.2128	3.5974	2.2485	0.3545	0.1904	3.2748	3.154	1.06227	0.932771
ALLVTASQCQQPAENK	Q01518	Adenylyl cyclase-associated protein 1 OS=Homo sapiens OX=9606 GN=CAP1 PE=1 SV=5	8.5493	9.4734	10.6744	11.6152	NA	9.0858	11.91	11.0133	1.0587	0.599998
VTQDATPGSALDKITASLCDLK	Q01581	Hydroxymethylglutaryl-CoA synthase, cytoplasmic OS=Homo sapiens OX=9606 GN=HMGCS1 PE=1 SV=2	14.3528	10.2513	NA	13.4645	NA	12.0111	18.5904	15.297	1.20568	0.314569
EGNDKDFTLNDFGFMIFHSPYCK	Q01581	Hydroxymethylglutaryl-CoA synthase, cytoplasmic OS=Homo sapiens OX=9606 GN=HMGCS1 PE=1 SV=2	NA	3.1535	5.5499	3.656	1.3734	2.3582	5.0912	3.5538	0.751044	0.404707
VCNLIDSGTKEGASILLDGR	Q02252	Methylmalonate-semialdehyde dehydrogenase [acylating], mitochondrial OS=Homo sapiens OX=9606 GN=ALDH6A1 PE=1 SV=2	NA	6.773	4.1595	3.8196	NA	4.952	4.5679	4.8075	0.971211	0.887542
AEMDAAIASCKR	Q02252	Methylmalonate-semialdehyde dehydrogenase [acylating], mitochondrial OS=Homo sapiens OX=9606 GN=ALDH6A1 PE=1 SV=2	0.4251	0.6583	0.7658	0.4192	0.2547	0.7304	0.7851	0.7897	1.1285	0.655736
SFGAEEHEVCR	Q03519	Antigen peptide transporter 2 OS=Homo sapiens OX=9606 GN=TAP2 PE=1 SV=1	1.6268	2.0179	1.4988	1.2975	1.787	3.623	1.2289	1.2345	1.22239	0.564108
LQGINCGPDFTPSFANLGR	Q04637	Eukaryotic translation initiation factor 4 gamma 1 OS=Homo sapiens OX=9606 GN=EIF4G1 PE=1 SV=4	13.488	10.617	9.1094	9.3157	6.6475	4.9628	NA	5.6491	0.541088	0.0117898
CDFPIMK	Q04760	Lactoylglutathione lyase OS=Homo sapiens OX=9606 GN=GLO1 PE=1 SV=4	0.925237	NA	0.694347	0.935762	NA	0.509723	0.409207	0.377071	1.81482	0.00895444
LWCNSHRPELVRPALER	Q04828	Aldo-keto reductase family 1 member C1 OS=Homo sapiens OX=9606 GN=AKR1C1 PE=1 SV=1	NA	1.1472	1.2302	1.3796	NA	1.1918	0.9825	1.1688	0.889832	0.21985
VDVFREDLCTK	Q06323	Proteasome activator complex subunit 1 OS=Homo sapiens OX=9606 GN=PSME1 PE=1 SV=1	6.76635	6.03975	6.38873	5.77321	5.0822	7.62493	6.76177	8.14688	1.10604	0.383889
ICQFLGK	Q06520	Bile salt sulfotransferase OS=Homo sapiens OX=9606 GN=SULT2A1 PE=1 SV=3	1.1974	1.2065	1.0384	NA	0.5705	0.6388	0.7753	0.5321	0.548333	0.00116607
HGEVCPAGWKPGSDTIKPDVQK	Q06830	Peroxiredoxin-1 OS=Homo sapiens OX=9606 GN=PRDX1 PE=1 SV=1	0.6785	0.6359	0.4506	0.4877	0.5568	0.3923	0.6244	0.4826	0.912727	0.534426
GCGTVLLSGPR	Q07020	60S ribosomal protein L18 OS=Homo sapiens OX=9606 GN=RPL18 PE=1 SV=2	12.2382	13.1888	NA	10.9928	15.3864	15.6244	17.7717	19.4343	1.4048	0.0111172
SSSSSSASAAAAAAAASSSASCSR	Q07065	Cytoskeleton-associated protein 4 OS=Homo sapiens OX=9606 GN=CKAP4 PE=1 SV=2	3.5674	4.2029	4.2434	3.5331	3.2326	5.1711	3.9913	4.3186	1.07505	0.537488
GPAGNNDCR	Q07955	Serine/arginine-rich splicing factor 1 OS=Homo sapiens OX=9606 GN=SRSF1 PE=1 SV=2	8.2391	12.2771	7.8335	7.9083	11.9753	19.6763	8.6606	13.5943	1.48675	0.133737
EAGDVCYADVYR	Q07955	Serine/arginine-rich splicing factor 1 OS=Homo sapiens OX=9606 GN=SRSF1 PE=1 SV=2	16.3964	13.9064	16.8838	NA	15.8215	18.0139	NA	13.818	1.00989	0.923514
SSVNCPFSSQDMKYPSPFFVFGEK	Q08211	ATP-dependent RNA helicase A OS=Homo sapiens OX=9606 GN=DHX9 PE=1 SV=4	2.0676	2.6274	3.9112	4.2666	3.0601	3.179	2.2203	2.2098	0.828817	0.381109
ALIHSACVK	Q08257	Quinone oxidoreductase OS=Homo sapiens OX=9606 GN=CRYZ PE=1 SV=1	NA	3.5633	8.0758	13.9224	NA	4.9454	3.1787	6.7528	0.582004	0.324251
LQPIALSCVLNIGACK	Q08752	Peptidyl-prolyl cis-trans isomerase D OS=Homo sapiens OX=9606 GN=PPID PE=1 SV=3	3.2576	2.9437	6.1203	5.065	NA	4.0965	8.9599	5.2011	1.40012	0.304488
TQSPCFGDDDPAKKEPR	Q12765	Secernin-1 OS=Homo sapiens OX=9606 GN=SCRN1 PE=1 SV=2	0.7805	0.7758	NA	0.823	1.2722	1.2531	0.9355	0.8466	1.35777	0.0798513
NHDGECTAAPTNR	Q12769	Nuclear pore complex protein Nup160 OS=Homo sapiens OX=9606 GN=NUP160 PE=1 SV=3	4.4714	3.3651	2.0584	5.6278	4.2177	3.7279	3.4227	3.636	0.966604	0.87372
MMYGVSPWGDSPIDFEDSAHVPCPR	Q13085	Acetyl-CoA carboxylase 1 OS=Homo sapiens OX=9606 GN=ACACA PE=1 SV=2	4.0994	10.1336	4.7305	9.5829	4.4535	7.2274	NA	6.849	0.865487	0.652518
TSCGSPNYAAPEVISGR	Q13131	5'-AMP-activated protein kinase catalytic subunit alpha-1 OS=Homo sapiens OX=9606 GN=PRKAA1 PE=1 SV=4	3.4914	3.3586	7.872	5.8538	4.4533	5.3418	8.8071	7.1325	1.25073	0.406858
YRNPVSQCMR	Q13148	TAR DNA-binding protein 43 OS=Homo sapiens OX=9606 GN=TARDBP PE=1 SV=1	1.0878	1.4985	3.2551	3.0848	1.3407	NA	2.0307	2.8513	0.929503	0.841222
WCDCKLPNSK	Q13148	TAR DNA-binding protein 43 OS=Homo sapiens OX=9606 GN=TARDBP PE=1 SV=1	NA	1.0929	0.7225	0.7669	0.4868	1.0129	1.0274	0.9106	0.998441	0.994314
TREEECHFYAGGQVYPGEASR	Q13162	Peroxiredoxin-4 OS=Homo sapiens OX=9606 GN=PRDX4 PE=1 SV=1	1.0524	1.7267	1.3877	0.9825	0.7982	1.288	1.0304	1.2321	0.844523	0.364378
EAGDVCYADVQKDGVGMVEYLR	Q13242	Serine/arginine-rich splicing factor 9 OS=Homo sapiens OX=9606 GN=SRSF9 PE=1 SV=1	1.8446	4.8343	1.8125	5.446	5.0216	2.6988	7.3849	3.7907	1.35578	0.407873
DCQLNAHKDHQYQFLEDAVR	Q13263	Transcription intermediary factor 1-beta OS=Homo sapiens OX=9606 GN=TRIM28 PE=1 SV=5	NA	1.1136	1.4866	1.9542	NA	1.3322	2.554	1.2626	1.13051	0.703674
LQGEGLSVAGIVCHVGK	Q13268	Dehydrogenase/reductase SDR family member 2, mitochondrial OS=Homo sapiens OX=9606 GN=DHRS2 PE=1 SV=4	0.6045	0.9447	0.8762	2.1923	0.6494	1.0836	0.8062	1.6276	0.902354	0.794466
VNCVVPGIIK	Q13268	Dehydrogenase/reductase SDR family member 2, mitochondrial OS=Homo sapiens OX=9606 GN=DHRS2 PE=1 SV=4	0.661437	0.703195	1.1602	2.32709	0.800206	0.792697	0.648464	0.847274	0.636581	0.302106
LPQPPEGQCYSN	Q13404	Ubiquitin-conjugating enzyme E2 variant 1 OS=Homo sapiens OX=9606 GN=UBE2V1 PE=1 SV=2	19.0283	36.1419	6.7966	8.1611	12.7118	13.8676	8.2536	10.2527	0.642907	0.398924
DFNEECPR	Q13418	Integrin-linked protein kinase OS=Homo sapiens OX=9606 GN=ILK PE=1 SV=2	0.8478	1.1182	1.6558	1.1308	1.3289	1.2849	1.3259	1.347	1.11238	0.460827
ECNPPNSQPASYQR	Q13427	Peptidyl-prolyl cis-trans isomerase G OS=Homo sapiens OX=9606 GN=PPIG PE=1 SV=2	0.8586	1.1124	1.1353	1.1185	0.7853	0.5003	NA	0.881	0.683772	0.042582
ECENCDCLQGFQLTHSLGGGTGSGMGTLLISK	Q13509	Tubulin beta-3 chain OS=Homo sapiens OX=9606 GN=TUBB3 PE=1 SV=2	4.1224	2.99648	4.41355	NA	11.8221	15.8293	17.3628	NA	3.90327	0.0028298
ISICSSDKR	Q13547	Histone deacetylase 1 OS=Homo sapiens OX=9606 GN=HDAC1 PE=1 SV=1	1.7067	2.1106	NA	1.5907	1.8162	1.2662	2.6608	2.3913	1.12812	0.579865
ALQSLACGKPTQR	Q13618	Cullin-3 OS=Homo sapiens OX=9606 GN=CUL3 PE=1 SV=2	3.8519	NA	2.0325	2.1059	NA	3.7424	1.7095	1.5183	0.872333	0.73244
GACAGSEDAVK	Q13813	Spectrin alpha chain, non-erythrocytic 1 OS=Homo sapiens OX=9606 GN=SPTAN1 PE=1 SV=3	10.8392	13.2157	NA	13.8388	8.01354	10.4542	9.80436	8.36294	0.725088	0.0196903
LIQSHPESAEDLQEKCTELNQAWSSLGK	Q13813	Spectrin alpha chain, non-erythrocytic 1 OS=Homo sapiens OX=9606 GN=SPTAN1 PE=1 SV=3	0.5434	0.3709	NA	0.4014	NA	1.1927	1.5951	1.4355	3.20993	0.00165501
ALCAEADRLQQSHPLSATQIQVK	Q13813	Spectrin alpha chain, non-erythrocytic 1 OS=Homo sapiens OX=9606 GN=SPTAN1 PE=1 SV=3	6.3557	5.0832	4.5586	5.1419	5.3135	8.4961	5.5613	4.2898	1.11927	0.543897
TYLLDGSCMVEESGTLESQLEATKR	Q13813	Spectrin alpha chain, non-erythrocytic 1 OS=Homo sapiens OX=9606 GN=SPTAN1 PE=1 SV=3	3.3225	NA	4.5011	6.3493	5.666	7.318	5.5457	6.1505	1.30602	0.160806
VNDVCTNGQDLIK	Q13813	Spectrin alpha chain, non-erythrocytic 1 OS=Homo sapiens OX=9606 GN=SPTAN1 PE=1 SV=3	3.44616	3.74888	2.36872	2.21754	3.41221	3.0474	2.10047	3.14877	0.99385	0.970997
NCPHIVVGTPGR	Q13838	Spliceosome RNA helicase DDX39B OS=Homo sapiens OX=9606 GN=DDX39B PE=1 SV=1	5.3528	8.7941	6.6317	7.3311	12.661	12.158	9.5303	8.5163	1.52494	0.0243588
KNCHLNENIEK	Q13907	Isopentenyl-diphosphate Delta-isomerase 1 OS=Homo sapiens OX=9606 GN=IDI1 PE=1 SV=2	0.3324	0.3135	0.2872	0.3571	0.3789	0.2287	0.2625	0.2923	0.900946	0.401626
HCDLQVR	Q14152	Eukaryotic translation initiation factor 3 subunit A OS=Homo sapiens OX=9606 GN=EIF3A PE=1 SV=1	0.2968	0.2765	0.4493	0.5507	0.3837	0.4874	0.5753	0.6515	1.33344	0.182306
LSQERPGVLLNQFPCENLLTVK	Q14166	Tubulin--tyrosine ligase-like protein 12 OS=Homo sapiens OX=9606 GN=TTLL12 PE=1 SV=2	4.247	4.9949	3.9559	5.0714	5.9859	NA	4.9261	3.6821	1.06512	0.664395
VMQPQILEVNFNPDCER	Q14166	Tubulin--tyrosine ligase-like protein 12 OS=Homo sapiens OX=9606 GN=TTLL12 PE=1 SV=2	2.217	3.5072	4.1559	1.1254	3.4043	2.0137	2.7061	1.1264	0.840534	0.617077
CYLTMTQALEAR	Q14204	Cytoplasmic dynein 1 heavy chain 1 OS=Homo sapiens OX=9606 GN=DYNC1H1 PE=1 SV=5	0.892	0.5841	NA	0.5997	1.7901	1.1733	1.1815	1.0121	1.86326	0.0416968
VQYPQSQACK	Q14204	Cytoplasmic dynein 1 heavy chain 1 OS=Homo sapiens OX=9606 GN=DYNC1H1 PE=1 SV=5	33.3008	46.3444	52.8267	44.311	53.4169	NA	58.1893	67.3792	1.34995	0.0470642
VQEAPIDEHWIIECNDGVFQR	Q14353	Guanidinoacetate N-methyltransferase OS=Homo sapiens OX=9606 GN=GAMT PE=1 SV=1	NA	0.6663	0.7216	0.5252	1.8274	NA	0.9535	0.8248	1.88474	0.152984
ENIRTEVMALVPPADCR	Q14353	Guanidinoacetate N-methyltransferase OS=Homo sapiens OX=9606 GN=GAMT PE=1 SV=1	NA	4.1397	2.1555	4.5325	3.3143	3.1439	3.4157	2.1527	0.833044	0.431587
LVFLACCVAPTNPR	Q14566	DNA replication licensing factor MCM6 OS=Homo sapiens OX=9606 GN=MCM6 PE=1 SV=1	NA	3.1333	3.2736	5.4552	4.3999	NA	3.9303	4.2691	1.06215	0.764005
KPYCNAHYPK	Q14847	LIM and SH3 domain protein 1 OS=Homo sapiens OX=9606 GN=LASP1 PE=1 SV=2	2.6891	4.8734	5.2929	6.9092	NA	8.3212	5.39	5.6477	1.30596	0.295189
FHEICSNLVK	Q15041	ADP-ribosylation factor-like protein 6-interacting protein 1 OS=Homo sapiens OX=9606 GN=ARL6IP1 PE=1 SV=2	1.1343	0.8624	1.0576	NA	0.9852	1.4207	0.919	0.6498	0.976009	0.907916
FVSCLLEQPEVLVTGAGR	Q15042	Rab3 GTPase-activating protein catalytic subunit OS=Homo sapiens OX=9606 GN=RAB3GAP1 PE=1 SV=3	4.7961	6.4506	7.1263	8.8621	4.3776	3.2715	NA	6.4672	0.691084	0.157837
LQNGDLDHMIPQHCSSELDGKAPMVDEK	Q15043	Zinc transporter ZIP14 OS=Homo sapiens OX=9606 GN=SLC39A14 PE=1 SV=3	4.658	5.7878	7.6438	5.503	6.4235	5.0619	4.8636	7.6696	1.01806	0.91045
IGSSELQEFCPTILQQLDSR	Q15043	Zinc transporter ZIP14 OS=Homo sapiens OX=9606 GN=SLC39A14 PE=1 SV=3	0.0255	0.0327	0.0337	0.0206	0.0381	0.0332	0.0099	0.0464	1.13422	0.669493
ILDDICVAK	Q15046	Lysine--tRNA ligase OS=Homo sapiens OX=9606 GN=KARS PE=1 SV=3	0.3793	0.673	0.5086	0.598	0.329	0.3893	0.4666	0.5785	0.816805	0.278463
KPLTSNCTIQIATPGK	Q15061	WD repeat-containing protein 43 OS=Homo sapiens OX=9606 GN=WDR43 PE=1 SV=3	0.6767	NA	0.6773	0.5342	0.5441	0.6586	0.7302	0.643	1.02316	0.818757
SSQQPVSEVSTIPCPR	Q15154	Pericentriolar material 1 protein OS=Homo sapiens OX=9606 GN=PCM1 PE=1 SV=5	0.9062	1.1748	0.8626	NA	1.3065	1.0929	0.7518	0.9697	1.04996	0.771233
EVESVDLPHCHLIK	Q15165	Serum paraoxonase/arylesterase 2 OS=Homo sapiens OX=9606 GN=PON2 PE=1 SV=4	0.6964	NA	0.6193	0.7133	NA	0.8049	0.5446	0.7733	1.04623	0.737367
HLNEIDLFHCIDPNDSK	Q15185	Prostaglandin E synthase 3 OS=Homo sapiens OX=9606 GN=PTGES3 PE=1 SV=1	4.7066	8.5842	6.7171	4.4565	8.1638	6.7127	7.0218	5.9979	1.14028	0.451565
FACHSASLTVR	Q15233	Non-POU domain-containing octamer-binding protein OS=Homo sapiens OX=9606 GN=NONO PE=1 SV=4	1.4526	0.5042	0.9051	NA	2.2907	0.8381	0.3985	1.9757	1.44214	0.500485
GPAHCLLLGER	Q15274	Nicotinate-nucleotide pyrophosphorylase [carboxylating] OS=Homo sapiens OX=9606 GN=QPRT PE=1 SV=3	6.8667	13.4274	18.5306	13.5702	10.1491	10.4969	25.0706	12.1031	1.10354	0.762743
WLHEINQNCDDVCR	Q15286	Ras-related protein Rab-35 OS=Homo sapiens OX=9606 GN=RAB35 PE=1 SV=1	0.1044	0.1339	NA	0.1028	0.131	0.2378	0.1084	0.0562	1.17282	0.686751
INISEGNCPER	Q15366; Q15365	Poly(rC)-binding protein 1 OS=Homo sapiens OX=9606 GN=PCBP1 PE=1 SV=2	67.6672	67.9795	69.4022	72.027	NA	95.6949	103.901	63.3661	1.26541	0.137893
CSDAAGYPHATHDLEGPPLDAYSIQGQHTISPLDLAK	Q15365	Poly(rC)-binding protein 1 OS=Homo sapiens OX=9606 GN=PCBP1 PE=1 SV=2	2.5564	2.67	2.4976	2.411	2.4404	2.304	2.5851	2.3984	0.959832	0.249489
AITIAGVPQSVTECVK	Q15365	Poly(rC)-binding protein 1 OS=Homo sapiens OX=9606 GN=PCBP1 PE=1 SV=2	8.6455	10.087	14.5961	12.3215	7.6362	11.9326	16.5878	10.6603	1.02556	0.902014
VMTIPYQPMPASSPVICAGGQDR	Q15365	Poly(rC)-binding protein 1 OS=Homo sapiens OX=9606 GN=PCBP1 PE=1 SV=2	6.7751	6.9944	6.7034	7.0233	6.8234	7.489	7.3096	6.8133	1.03415	0.260845
LVVPATQCGSLIGK	Q15365	Poly(rC)-binding protein 1 OS=Homo sapiens OX=9606 GN=PCBP1 PE=1 SV=2	36.7336	37.2297	NA	40.4956	37.5691	29.1499	34.0172	33.4474	0.879248	0.0979674
AITIAGIPQSIIECVK	Q15366	Poly(rC)-binding protein 2 OS=Homo sapiens OX=9606 GN=PCBP2 PE=1 SV=1	2.0301	4.8387	5.9628	5.7025	1.6312	4.8585	5.1093	5.3133	0.912496	0.757142
LVVPASQCGSLIGK	Q15366	Poly(rC)-binding protein 2 OS=Homo sapiens OX=9606 GN=PCBP2 PE=1 SV=1	NA	11.7971	14.7818	17.8296	NA	12.8682	10.5482	10.1342	0.7555	0.135241
GLEAICAK	Q15392	Delta(24)-sterol reductase OS=Homo sapiens OX=9606 GN=DHCR24 PE=1 SV=2	3.49951	2.48697	1.77249	1.87827	0.701055	NA	3.32948	1.75734	0.800764	0.571062
LGCQDAFPEVYDKICK	Q15392	Delta(24)-sterol reductase OS=Homo sapiens OX=9606 GN=DHCR24 PE=1 SV=2	1.5824	2.0322	1.3692	0.7398	1.5233	0.9761	1.0963	0.7644	0.761776	0.317376
CYGFVTMSTAEEATK	Q15424	Scaffold attachment factor B1 OS=Homo sapiens OX=9606 GN=SAFB PE=1 SV=4	0.8693	0.8271	0.6604	NA	0.7977	0.6485	1.1802	1.0279	1.1629	0.431852
MVQVHELGCEGISK	Q15436	Protein transport protein Sec23A OS=Homo sapiens OX=9606 GN=SEC23A PE=1 SV=2	0.8384	0.9635	0.8281	0.8892	0.9639	0.8336	1.0476	1.1118	1.12437	0.156435
GFNKETAAACVEK	Q15631	Translin OS=Homo sapiens OX=9606 GN=TSN PE=1 SV=1	0.6993	1.0147	1.1021	1.2289	0.9739	1.458	1.2987	1.4786	1.28781	0.12311
SITNTTVCTK	Q15637	Splicing factor 1 OS=Homo sapiens OX=9606 GN=SF1 PE=1 SV=4	3.4055	5.7999	4.0528	3.8377	4.5021	4.2137	4.2421	5.4425	1.0763	0.606292
FFLGDLCSR	Q15738	Sterol-4-alpha-carboxylate 3-dehydrogenase, decarboxylating OS=Homo sapiens OX=9606 GN=NSDHL PE=1 SV=2	8.5628	10.9915	10.2319	NA	5.8914	5.488	5.424	4.4124	0.534202	0.00124404
CVEENNGVAK	Q15758	Neutral amino acid transporter B(0) OS=Homo sapiens OX=9606 GN=SLC1A5 PE=1 SV=2	16.6482	10.9689	13.0921	8.2649	6.8455	27.279	14.3719	9.234	1.17879	0.67024
ADTLTPEECQQFKK	Q16181	Septin-7 OS=Homo sapiens OX=9606 GN=SEPT7 PE=1 SV=2	NA	11.353	16.0359	19.7482	13.0308	12.0861	14.6602	NA	0.84386	0.389234
IGRPSETGIIGIIDPECR	Q16531	DNA damage-binding protein 1 OS=Homo sapiens OX=9606 GN=DDB1 PE=1 SV=1	1.6164	1.7355	NA	1.8359	1.2283	2.1614	1.6961	2.0622	1.03339	0.830314
GLYDGPVCEVSVTPK	Q16555	Dihydropyrimidinase-related protein 2 OS=Homo sapiens OX=9606 GN=DPYSL2 PE=1 SV=1	8.4153	6.9215	9.5678	9.3534	6.651	7.9412	9.2789	9.4418	0.972412	0.799035
ELHGQNPVVTPCNK	Q16630	Cleavage and polyadenylation specificity factor subunit 6 OS=Homo sapiens OX=9606 GN=CPSF6 PE=1 SV=2	1.4616	2.0189	1.1246	1.3084	1.8606	1.9381	1.6606	1.5963	1.19313	0.221181
NGDICETSGKPK	Q16637	Survival motor neuron protein OS=Homo sapiens OX=9606 GN=SMN1 PE=1 SV=1	1.89996	1.82762	1.97359	1.3482	1.62578	1.65071	1.83153	1.19181	0.893673	0.375625
VGKDELFALEQSCAQVVLQAANER	Q16658	Fascin OS=Homo sapiens OX=9606 GN=FSCN1 PE=1 SV=3	2.592	3.2139	2.6148	3.247	3.8372	3.1036	3.0993	2.9557	1.11383	0.263542
VYCGHEYTINNLK	Q16775	Hydroxyacylglutathione hydrolase, mitochondrial OS=Homo sapiens OX=9606 GN=HAGH PE=1 SV=2	0.4674	0.3418	0.5465	0.4723	0.2442	0.5754	0.1962	0.2523	0.693709	0.19836
YNNCWLAR	Q16822	Phosphoenolpyruvate carboxykinase [GTP], mitochondrial OS=Homo sapiens OX=9606 GN=PCK2 PE=1 SV=4	NA	5.3689	4.8406	3.938	NA	6.7021	6.1783	4.6105	1.23632	0.213736
VLDWICR	Q16822	Phosphoenolpyruvate carboxykinase [GTP], mitochondrial OS=Homo sapiens OX=9606 GN=PCK2 PE=1 SV=4	NA	6.3759	6.5064	7.4718	NA	8.7566	8.3037	6.2205	1.14379	0.317026
AVDERFPGCMQGR	Q16822	Phosphoenolpyruvate carboxykinase [GTP], mitochondrial OS=Homo sapiens OX=9606 GN=PCK2 PE=1 SV=4	NA	4.7445	3.7928	3.3682	NA	5.5713	4.2656	4.3268	1.18968	0.270152
CLHSVGQPLTGQGEPVSQWPCNPEK	Q16822	Phosphoenolpyruvate carboxykinase [GTP], mitochondrial OS=Homo sapiens OX=9606 GN=PCK2 PE=1 SV=4	NA	4.7733	3.8415	3.5436	NA	6.4503	4.8512	4.7189	1.31764	0.126395
LCQPEGIHICDGTEAENTATLTLLEQQGLIR	Q16822	Phosphoenolpyruvate carboxykinase [GTP], mitochondrial OS=Homo sapiens OX=9606 GN=PCK2 PE=1 SV=4	NA	4.1237	5.1555	4.6421	NA	6.5731	5.7422	5.7348	1.29658	0.02787
YVAAAFPSACGK	Q16822	Phosphoenolpyruvate carboxykinase [GTP], mitochondrial OS=Homo sapiens OX=9606 GN=PCK2 PE=1 SV=4	25.415	24.5273	17.1928	17.697	20.3897	17.9487	NA	22.1859	0.95128	0.725303
QCPIMDPAWEAPEGVPIDAIIFGGR	Q16822	Phosphoenolpyruvate carboxykinase [GTP], mitochondrial OS=Homo sapiens OX=9606 GN=PCK2 PE=1 SV=4	2.9668	2.506	2.6576	3.4575	1.7613	3.5545	2.5771	3.1281	0.951078	0.758478
VECVGDDIAWMR	Q16822	Phosphoenolpyruvate carboxykinase [GTP], mitochondrial OS=Homo sapiens OX=9606 GN=PCK2 PE=1 SV=4	1.6652	NA	6.6466	6.8886	NA	7.4989	7.5047	6.7665	1.43221	0.271859
NFILDQCNVYNSGQR	Q1KMD3	Heterogeneous nuclear ribonucleoprotein U-like protein 2 OS=Homo sapiens OX=9606 GN=HNRNPUL2 PE=1 SV=1	0.6764	0.7397	0.8041	1.1334	0.5368	0.8222	1.1958	0.8059	1.00212	0.991978
LQEALDAEMLEDEAGGGGAGPGGACK	Q1KMD3	Heterogeneous nuclear ribonucleoprotein U-like protein 2 OS=Homo sapiens OX=9606 GN=HNRNPUL2 PE=1 SV=1	3.3503	3.8987	2.4377	2.6514	3.4762	NA	3.1518	2.7954	1.01835	0.899974
ANFSLPEKCDYMDEVTYGELEKEEAQPIVTK	Q1KMD3	Heterogeneous nuclear ribonucleoprotein U-like protein 2 OS=Homo sapiens OX=9606 GN=HNRNPUL2 PE=1 SV=1	3.3298	3.3065	4.0017	2.2188	3.2045	2.7334	3.4132	3.6398	1.01043	0.938444
KLVNSVAGCADDALAGLVACNPNLQLLQGHR	Q3LXA3	Triokinase/FMN cyclase OS=Homo sapiens OX=9606 GN=TKFC PE=1 SV=2	7.14586	NA	8.28682	3.45276	6.6342	11.1971	NA	10.6062	1.50579	0.194415
GLCGTVLIHK	Q3LXA3	Triokinase/FMN cyclase OS=Homo sapiens OX=9606 GN=TKFC PE=1 SV=2	16.3969	14.8623	NA	11.3816	13.777	9.6944	7.7117	10.6321	0.735479	0.110855
TFVDFFSQCLHEEYR	Q53GQ0	Very-long-chain 3-oxoacyl-CoA reductase OS=Homo sapiens OX=9606 GN=HSD17B12 PE=1 SV=2	6.1729	5.1948	8.8394	10.772	4.3244	2.5306	5.0874	6.0545	0.580937	0.0696548
QLVPASGLTVMDLEAEGTCLR	Q6P996	Pyridoxal-dependent decarboxylase domain-containing protein 1 OS=Homo sapiens OX=9606 GN=PDXDC1 PE=1 SV=2	0.3901	1.9316	1.0875	2.2316	0.5315	1.263	2.4247	2.3594	1.16625	0.717836
GDAHECFVSPVAK	Q6UB35	Monofunctional C1-tetrahydrofolate synthase, mitochondrial OS=Homo sapiens OX=9606 GN=MTHFD1L PE=1 SV=1	6.8704	7.712	NA	4.7529	3.5473	5.1539	8.7337	5.3701	0.884587	0.637634
TAIHTAAMDMLGGPGIESQCR	Q6YN16	Hydroxysteroid dehydrogenase-like protein 2 OS=Homo sapiens OX=9606 GN=HSDL2 PE=1 SV=1	4.2557	3.9117	6.1673	5.5756	4.3943	4.728	NA	5.6865	0.991701	0.955906
TIQFVDWCPTGFK	Q71U36; Q9BQE3	Tubulin alpha-1A chain OS=Homo sapiens OX=9606 GN=TUBA1A PE=1 SV=1	18.2813	12.1073	13.5757	16.3785	17.2609	12.7925	18.025	22.3525	1.16718	0.333504
LTEGCSFR	Q71UM5; P42677	40S ribosomal protein S27-like OS=Homo sapiens OX=9606 GN=RPS27L PE=1 SV=3	0.232	0.4367	0.5228	0.2377	0.2937	0.5353	0.3313	0.3921	1.0862	0.744255
FDPTQFQDCIIQGLTETGTDLEAVAK	Q7L1Q6	Basic leucine zipper and W2 domain-containing protein 1 OS=Homo sapiens OX=9606 GN=BZW1 PE=1 SV=1	5.9326	6.2212	6.1482	5.5176	6.5955	7.0228	6.5669	4.3851	1.03152	0.770795
GVPGAIVNVSSQCSQR	Q7Z4W1	L-xylulose reductase OS=Homo sapiens OX=9606 GN=DCXR PE=1 SV=2	NA	2.6643	2.4719	2.2729	NA	3.0771	2.2097	2.5197	1.05364	0.658343
AVTNHSVYCSTK	Q7Z4W1	L-xylulose reductase OS=Homo sapiens OX=9606 GN=DCXR PE=1 SV=2	0.6127	0.6875	0.9149	1.15	0.7163	0.4331	0.5405	0.4138	0.625152	0.0648171
ECPGIEPVCVDLGDWEATER	Q7Z4W1	L-xylulose reductase OS=Homo sapiens OX=9606 GN=DCXR PE=1 SV=2	NA	0.2584	0.4537	0.2262	0.5526	0.3544	0.4638	0.2757	1.31608	0.337949
CFIEEIPDETMVIGNYR	Q7Z7H5; Q9BVK6	Transmembrane emp24 domain-containing protein 4 OS=Homo sapiens OX=9606 GN=TMED4 PE=1 SV=1	0.0811	NA	0.2302	0.1451	0.0464	0.0804	0.2342	0.1392	0.821976	0.673654
GTPEQPQCGFSNAVVQILR	Q86SX6	Glutaredoxin-related protein 5, mitochondrial OS=Homo sapiens OX=9606 GN=GLRX5 PE=1 SV=2	0.0407	0.0531	0.0418	0.0565	0.054	0.043	0.0764	NA	1.20354	0.349504
VCFVTSMMTGR	Q86TG7	Retrotransposon-derived protein PEG10 OS=Homo sapiens OX=9606 GN=PEG10 PE=1 SV=2	15.7614	NA	15.8507	17.5252	7.2227	13.6884	15.2761	NA	0.736451	0.163009
CGVHVLQSALLQLPR	Q86U38	Nucleolar protein 9 OS=Homo sapiens OX=9606 GN=NOP9 PE=1 SV=1	4.367	6.5805	6.2856	8.0482	6.2422	7.3314	6.7094	4.6354	0.985646	0.927114
NCIGDFLK	Q86VP6	Cullin-associated NEDD8-dissociated protein 1 OS=Homo sapiens OX=9606 GN=CAND1 PE=1 SV=2	5.5213	5.279	4.2735	NA	6.6596	4.092	4.7691	6.3771	1.08953	0.598756
AKPTGSGKEEGPAPCK	Q8IUF8	Ribosomal oxygenase 2 OS=Homo sapiens OX=9606 GN=RIOX2 PE=1 SV=1	1.6249	1.1402	2.9765	3.6362	1.5945	1.591	NA	2.9862	0.877491	0.730597
SAPHLPGLMCLLR	Q8IZL8	Proline-, glutamic acid- and leucine-rich protein 1 OS=Homo sapiens OX=9606 GN=PELP1 PE=1 SV=2	6.4075	9.2803	9.6626	5.5664	5.5943	4.2439	4.5321	5.8025	0.652487	0.0493644
LNQVCFDDDGTSSPQDRLTLSQFQK	Q8N1F7	Nuclear pore complex protein Nup93 OS=Homo sapiens OX=9606 GN=NUP93 PE=1 SV=2	5.1882	5.6821	4.3929	6.4153	8.1627	4.4804	6.2556	NA	1.16236	0.428533
DSGLFCVPLTALLEQDQR	Q8N392	Rho GTPase-activating protein 18 OS=Homo sapiens OX=9606 GN=ARHGAP18 PE=1 SV=3	11.2414	9.721	NA	12.016	10.6704	9.5593	15.6238	17.0704	1.2036	0.36471
ALQAQEIECR	Q8NBJ5	Procollagen galactosyltransferase 1 OS=Homo sapiens OX=9606 GN=COLGALT1 PE=1 SV=1	0.2198	0.3355	0.4341	0.2453	0.2535	0.2795	0.5292	0.297	1.10083	0.71129
VDCTAHSDVCSAQGVR	Q8NBS9	Thioredoxin domain-containing protein 5 OS=Homo sapiens OX=9606 GN=TXNDC5 PE=1 SV=2	NA	0.122738	0.109035	0.0983043	0.132178	0.128458	0.112845	0.0965159	1.06793	0.538166
TCLITFKPGAFIPGAPVQPVVLR	Q8NF37	Lysophosphatidylcholine acyltransferase 1 OS=Homo sapiens OX=9606 GN=LPCAT1 PE=1 SV=2	NA	2.8834	13.9614	15.5984	51.742	0.0235	15.2607	15.2675	1.90241	0.499998
ACNPQPNGENAISAR	Q8NHP8	Putative phospholipase B-like 2 OS=Homo sapiens OX=9606 GN=PLBD2 PE=1 SV=2	0.1119	0.3491	0.1809	NA	0.18	NA	0.0531	0.1558	0.605858	0.353772
AVEAAQAHQMAPDMFYCMK	Q8TD30	Alanine aminotransferase 2 OS=Homo sapiens OX=9606 GN=GPT2 PE=1 SV=1	0.2075	0.3738	0.3808	0.4733	0.1481	0.4341	0.4559	0.2904	0.925526	0.777444
VLCIINPGNPTGQVQSR	Q8TD30	Alanine aminotransferase 2 OS=Homo sapiens OX=9606 GN=GPT2 PE=1 SV=1	0.1539	0.1536	0.0408	0.1645	0.1363	0.148	0.1309	0.1284	1.06006	0.803237
QVMALCTYPNLLDSPSFPEDAK	Q8TD30	Alanine aminotransferase 2 OS=Homo sapiens OX=9606 GN=GPT2 PE=1 SV=1	NA	0.859	1.0841	1.0328	NA	0.9767	0.7512	0.5502	0.765516	0.173795
AVQEAKDHCDPK	Q8TD30	Alanine aminotransferase 2 OS=Homo sapiens OX=9606 GN=GPT2 PE=1 SV=1	0.028	0.046	0.0352	0.0201	0.0211	0.0271	0.0348	0.0238	0.825986	0.402898
ACYALENFVENLGPK	Q8TEX9	Importin-4 OS=Homo sapiens OX=9606 GN=IPO4 PE=1 SV=2	0.7613	0.8787	0.8751	NA	0.683	0.5217	0.7477	0.6667	0.781013	0.0368861
VRDNICGALAR	Q8TEX9	Importin-4 OS=Homo sapiens OX=9606 GN=IPO4 PE=1 SV=2	5.4328	7.9266	5.0673	7.4712	5.5971	NA	5.4398	8.133	0.986947	0.94274
ACQSCPSEPNTAALQAALAR	Q8TEX9	Importin-4 OS=Homo sapiens OX=9606 GN=IPO4 PE=1 SV=2	6.5961	4.647	5.2963	7.5091	4.825	3.9364	6.69	8.9155	1.01324	0.952286
FIQQTYPSGGEEQAQYCR	Q8WUM4	Programmed cell death 6-interacting protein OS=Homo sapiens OX=9606 GN=PDCD6IP PE=1 SV=1	10.2224	13.2484	NA	11.7369	1.367	13.1195	21.9304	16.3993	1.1251	0.788685
HCIMQANAEYHQSILAK	Q8WUM4	Programmed cell death 6-interacting protein OS=Homo sapiens OX=9606 GN=PDCD6IP PE=1 SV=1	4.147	2.9114	3.2938	2.8851	3.3231	2.9124	3.1566	2.965	0.933506	0.503192
VVQHLCQR	Q8WUY1	Protein THEM6 OS=Homo sapiens OX=9606 GN=THEM6 PE=1 SV=2	2.0934	1.5098	2.2653	1.3481	1.5425	1.336	2.5877	1.4951	0.964623	0.865816
MADCGGLPQISQPAK	Q92597	Protein NDRG1 OS=Homo sapiens OX=9606 GN=NDRG1 PE=1 SV=1	13.1156	NA	15.1532	10.5112	14.1047	35.6309	28.3308	9.3141	1.68993	0.277709
CTPSVISFGSK	Q92598	Heat shock protein 105 kDa OS=Homo sapiens OX=9606 GN=HSPH1 PE=1 SV=1	2.8189	2.2467	3.7396	2.2246	3.6487	3.389	4.8847	2.9551	1.34885	0.128232
FICEQDHQNFLR	Q92598	Heat shock protein 105 kDa OS=Homo sapiens OX=9606 GN=HSPH1 PE=1 SV=1	33.7079	22.4794	20.4084	42.0184	31.4528	23.583	NA	28.0484	0.933944	0.767491
IKNPFLSLAACVMPSR	Q92616	eIF-2-alpha kinase activator GCN1 OS=Homo sapiens OX=9606 GN=GCN1 PE=1 SV=6	7.8583	6.927	NA	7.1524	13.6998	NA	7.0797	11.4497	1.46912	0.15555
DISTLEPLKKLECLK	Q92688	Acidic leucine-rich nuclear phosphoprotein 32 family member B OS=Homo sapiens OX=9606 GN=ANP32B PE=1 SV=1	NA	33.8182	19.7211	42.4366	12.6176	19.7871	28.3394	42.5174	0.806933	0.540543
SLDLFNCEVTNLNDYRESVFK	Q92688	Acidic leucine-rich nuclear phosphoprotein 32 family member B OS=Homo sapiens OX=9606 GN=ANP32B PE=1 SV=1	2.98	3.7914	2.6493	5.1076	3.3337	5.5082	3.1646	5.2696	1.18913	0.438172
LSYLLMCLESAVHR	Q92896	Golgi apparatus protein 1 OS=Homo sapiens OX=9606 GN=GLG1 PE=1 SV=2	21.3652	17.9649	23.5735	18.7452	24.8179	23.2223	13.8863	17.1375	0.968342	0.829139
GNLGMNCQQALQTLIQETDPGADYRIDR	Q92896	Golgi apparatus protein 1 OS=Homo sapiens OX=9606 GN=GLG1 PE=1 SV=2	0.1264	0.093	0.1764	0.221	0.16	0.0607	0.1344	0.0698	0.688878	0.244045
ALNEACESVIQTACK	Q92896	Golgi apparatus protein 1 OS=Homo sapiens OX=9606 GN=GLG1 PE=1 SV=2	0.3618	0.2489	0.3966	NA	0.1284	0.222	NA	0.2722	0.618088	0.104777
GGEQINKIQQDSGCK	Q92945	Far upstream element-binding protein 2 OS=Homo sapiens OX=9606 GN=KHSRP PE=1 SV=4	1.0967	5.777	3.9109	1.2945	2.1008	0.6087	1.9833	2.6556	0.608357	0.363194
QGGFLPGGGSLHSTMTPHGPDADCFEK	Q93099	Homogentisate 1,2-dioxygenase OS=Homo sapiens OX=9606 GN=HGD PE=1 SV=2	6.811	NA	6.3067	5.9873	6.447	5.3112	5.1803	6.9743	0.938739	0.513329
LATDLLSLMPSLTSGEVAHCAK	Q969Z0	FAST kinase domain-containing protein 4 OS=Homo sapiens OX=9606 GN=TBRG4 PE=1 SV=1	0.2182	0.4312	NA	0.2457	0.1799	0.1462	0.4166	0.5357	1.07117	0.87111
TCFSMVPALQQELDSRPQLR	Q96AB3	Isochorismatase domain-containing protein 2 OS=Homo sapiens OX=9606 GN=ISOC2 PE=1 SV=1	5.2909	3.3818	4.7005	NA	5.8804	5.7516	5.8906	6.4824	1.34626	0.0292431
MQHLNPDPQLIPEQITTDITPECLVSPR	Q96AC1	Fermitin family homolog 2 OS=Homo sapiens OX=9606 GN=FERMT2 PE=1 SV=1	6.4438	7.5059	6.7752	7.1309	4.7181	4.7124	5.5113	6.9164	0.784691	0.0383624
VAGDCLDEKQCK	Q96AG4	Leucine-rich repeat-containing protein 59 OS=Homo sapiens OX=9606 GN=LRRC59 PE=1 SV=1	NA	70.0918	84.5208	63.3465	NA	9.9252	26.1852	27.4847	0.291775	0.00363157
LTTLPSDFCGLTHLVK	Q96AG4	Leucine-rich repeat-containing protein 59 OS=Homo sapiens OX=9606 GN=LRRC59 PE=1 SV=1	0.1438	0.1257	0.1685	0.1163	0.1598	NA	0.1384	0.1337	1.03891	0.736735
IGPSILNSDLANLGAECLR	Q96AT9	Ribulose-phosphate 3-epimerase OS=Homo sapiens OX=9606 GN=RPE PE=1 SV=1	2.1501	1.9088	1.3796	1.6385	2.5712	2.5329	2.9875	2.6342	1.51559	0.00353624
NVCSEAAQKR	Q96AT9	Ribulose-phosphate 3-epimerase OS=Homo sapiens OX=9606 GN=RPE PE=1 SV=1	NA	1.1182	9.7366	7.5064	0.4881	0.2652	NA	2.3263	0.167723	0.128425
QHLDQLQYNQQFLSCHDPINIQFTSGTTGSPK	Q96CM8	Acyl-CoA synthetase family member 2, mitochondrial OS=Homo sapiens OX=9606 GN=ACSF2 PE=1 SV=2	NA	1.856	1.3867	2.0696	NA	2.0784	1.7772	2.1323	1.12718	0.382897
QICPEVENAQPGALK	Q96CM8	Acyl-CoA synthetase family member 2, mitochondrial OS=Homo sapiens OX=9606 GN=ACSF2 PE=1 SV=2	NA	0.4915	0.6943	0.7007	NA	0.5615	0.6967	0.5657	0.966817	0.811191
NIDPKPCTPR	Q96EP5	DAZ-associated protein 1 OS=Homo sapiens OX=9606 GN=DAZAP1 PE=1 SV=1	3.7254	3.6666	3.447	2.7918	3.9885	4.593	3.7666	3.6671	1.17493	0.092409
QEPLGSDSEGVNCLAYDEAIMAQQDR	Q96FW1	Ubiquitin thioesterase OTUB1 OS=Homo sapiens OX=9606 GN=OTUB1 PE=1 SV=2	NA	3.742	4.9833	4.1869	9.3307	5.0797	9.5876	5.8865	1.73583	0.0741288
YSEEANNLIEECEQAER	Q96HE7	ERO1-like protein alpha OS=Homo sapiens OX=9606 GN=ERO1A PE=1 SV=2	0.3567	0.4057	0.315	0.1913	0.5148	0.3393	0.26	0.2541	1.07843	0.754987
IWNVIYEENCFKPQTIK	Q96HE7	ERO1-like protein alpha OS=Homo sapiens OX=9606 GN=ERO1A PE=1 SV=2	NA	2.0253	2.1402	1.6148	NA	1.1641	1.3405	2.8427	0.92509	0.80797
DCAVKPCQSDEVPDGIK	Q96HE7	ERO1-like protein alpha OS=Homo sapiens OX=9606 GN=ERO1A PE=1 SV=2	1.8013	2.128	3.8058	NA	2.7134	2.1623	NA	1.438	0.81624	0.547742
IDATQVEVNPFGETPEGQVVCFDAK	Q96I99	Succinate--CoA ligase [GDP-forming] subunit beta, mitochondrial OS=Homo sapiens OX=9606 GN=SUCLG2 PE=1 SV=2	NA	0.4294	0.3579	0.6393	0.4161	0.5538	0.3848	0.5438	0.99809	0.992101
CVVALATDPNILSLSGK	Q96LJ7	Dehydrogenase/reductase SDR family member 1 OS=Homo sapiens OX=9606 GN=DHRS1 PE=1 SV=1	0.0959	0.2099	NA	0.1137	0.1267	0.1343	0.1247	0.1561	0.968653	0.89246
IGNCPFSQR	Q96NY7	Chloride intracellular channel protein 6 OS=Homo sapiens OX=9606 GN=CLIC6 PE=2 SV=3	NA	39.3059	27.9467	31.7682	24.5218	42.0665	24.0057	40.3944	0.992128	0.969409
TQCALAASK	Q96QK1	Vacuolar protein sorting-associated protein 35 OS=Homo sapiens OX=9606 GN=VPS35 PE=1 SV=2	12.7076	11.0924	11.4807	NA	8.291	8.2625	13.2603	15.646	0.966388	0.865938
DSAQCAAIAER	Q96RS6	NudC domain-containing protein 1 OS=Homo sapiens OX=9606 GN=NUDCD1 PE=1 SV=2	0.1247	0.1345	0.1727	0.2061	0.1324	0.19	0.1602	0.1775	1.03464	0.813819
VGESNLTNGDEPTQCSR	Q96T76	MMS19 nucleotide excision repair protein homolog OS=Homo sapiens OX=9606 GN=MMS19 PE=1 SV=2	1.8092	0.9216	1.1392	1.9295	1.0811	1.1237	1.8028	1.3704	0.927321	0.735483
ATEGMVVADKNCSK	Q99436	Proteasome subunit beta type-7 OS=Homo sapiens OX=9606 GN=PSMB7 PE=1 SV=1	6.321	16.5456	12.0151	0.9922	7.2776	3.6863	5.3758	9.6288	0.723883	0.519008
VLTMPETCR	Q99460	26S proteasome non-ATPase regulatory subunit 1 OS=Homo sapiens OX=9606 GN=PSMD1 PE=1 SV=2	14.3007	11.868	9.7537	NA	10.1626	11.8728	NA	9.4338	0.876033	0.37822
VTVAGLAGKDPVQCSR	Q99497	Protein/nucleic acid deglycase DJ-1 OS=Homo sapiens OX=9606 GN=PARK7 PE=1 SV=2	11.1723	NA	6.49286	12.699	10.0871	7.28336	2.64989	2.79835	0.563627	0.157008
DVVICPDASLEDAKK	Q99497	Protein/nucleic acid deglycase DJ-1 OS=Homo sapiens OX=9606 GN=PARK7 PE=1 SV=2	12.1709	8.1288	11.2006	9.4383	NA	9.3233	7.177	7.9379	0.79593	0.139355
NQNNYHCHCR	Q99519	Sialidase-1 OS=Homo sapiens OX=9606 GN=NEU1 PE=1 SV=1	0.7317	1.3056	1.3475	0.8144	0.7477	1.2004	1.5107	1.7899	1.24993	0.377349
ACGLNFADLMAR	Q99536	Synaptic vesicle membrane protein VAT-1 homolog OS=Homo sapiens OX=9606 GN=VAT1 PE=1 SV=2	0.1759	0.3141	0.2991	0.1809	0.0853	0.1545	0.1604	NA	0.550103	0.0737318
CLVLTGFGGYDK	Q99536	Synaptic vesicle membrane protein VAT-1 homolog OS=Homo sapiens OX=9606 GN=VAT1 PE=1 SV=2	4.04911	7.36048	5.52192	6.6112	5.01835	8.95541	6.70556	8.98136	1.25987	0.249596
VCNFLASQVPFPSR	Q99714	3-hydroxyacyl-CoA dehydrogenase type-2 OS=Homo sapiens OX=9606 GN=HSD17B10 PE=1 SV=3	1.2635	1.4003	NA	1.2528	1.5706	NA	1.5594	1.0221	1.06013	0.696391
VGLIGSCTNSSYEDMGR	Q99798	Aconitate hydratase, mitochondrial OS=Homo sapiens OX=9606 GN=ACO2 PE=1 SV=2	0.1094	0.1992	0.2997	0.2569	0.0976	0.0532	0.1593	NA	0.477886	0.0955923
QLCDNAGFDATNILNK	Q99832	T-complex protein 1 subunit eta OS=Homo sapiens OX=9606 GN=CCT7 PE=1 SV=2	4.0032	1.6269	3.2953	2.4372	3.7478	2.3635	1.9329	1.5922	0.848081	0.560293
CAMTALSSK	Q99832	T-complex protein 1 subunit eta OS=Homo sapiens OX=9606 GN=CCT7 PE=1 SV=2	NA	17.509	20.263	15.8193	NA	14.4916	20.9775	12.7586	0.899917	0.560088
FSGGYPALMDCMNK	Q9BPW8	Protein NipSnap homolog 1 OS=Homo sapiens OX=9606 GN=NIPSNAP1 PE=1 SV=1	NA	1.7173	4.1729	2.0968	NA	1.5527	1.8447	2.0203	0.678315	0.331274
AIPLVLVSGNHDIGNTPTAETVEEFCR	Q9BRF8	Serine/threonine-protein phosphatase CPPED1 OS=Homo sapiens OX=9606 GN=CPPED1 PE=1 SV=3	2.5997	3.6515	3.0762	3.5355	2.236	3.3137	3.2958	3.8787	0.989217	0.936662
VAGTQACATETIDTSR	Q9BRR6	ADP-dependent glucokinase	1.2561	2.0255	0.951	NA	1.1154	1.1687	1.4329	0.879	0.814393	0.421753
GSSVDAPPRPCHTTPDSQFGTEHVLR	Q9BSJ8	Extended synaptotagmin-1 OS=Homo sapiens OX=9606 GN=ESYT1 PE=1 SV=1	9.6301	NA	8.5074	16.2021	12.132	NA	9.1147	12.5142	0.983148	0.945044
AVYSTNCPVWEEAFR	Q9BSJ8	Extended synaptotagmin-1 OS=Homo sapiens OX=9606 GN=ESYT1 PE=1 SV=1	4.5239	2.9492	2.431	5.7271	9.4178	9.5578	6.7585	5.4061	1.99218	0.0223275
NHQEEDLTEFLCANHVLK	Q9BT09	Protein canopy homolog 3 OS=Homo sapiens OX=9606 GN=CNPY3 PE=1 SV=1	NA	0.0452	0.0394	0.0929	0.0443	0.035	NA	0.149	1.2862	0.695855
ESESCDCLQGFQLTHSLGGGTGSGMGTLLISK	Q13885; Q9BVA1	Tubulin beta-2B chain OS=Homo sapiens OX=9606 GN=TUBB2B PE=1 SV=1	0.8389	0.8623	1.8219	1.2655	0.131	0.1286	1.0417	1.8779	0.66391	0.433163
IGEMPLTDSILCDGLTDAFHNCHMGITAENVAK	Q9BWD1	Acetyl-CoA acetyltransferase, cytosolic OS=Homo sapiens OX=9606 GN=ACAT2 PE=1 SV=2	18.7693	14.8467	8.3392	7.6701	11.2092	26.7869	NA	16.6479	1.46818	0.293901
QASVGAGIPYSVPAWSCQMICGSGLK	Q9BWD1	Acetyl-CoA acetyltransferase, cytosolic OS=Homo sapiens OX=9606 GN=ACAT2 PE=1 SV=2	5.8752	4.3303	6.7036	3.3248	11.257	7.1631	4.9168	16.1041	1.94925	0.111468
ATVAPEDVSEVIFGHVLAAGCGQNPVR	Q9BWD1	Acetyl-CoA acetyltransferase, cytosolic OS=Homo sapiens OX=9606 GN=ACAT2 PE=1 SV=2	5.20502	5.94927	6.28026	6.46861	5.04396	5.70598	5.82565	6.47821	0.964466	0.618672
IVHSLDYYNTCEYPNEDEMPNR	Q9BXP5	Serrate RNA effector molecule homolog OS=Homo sapiens OX=9606 GN=SRRT PE=1 SV=1	NA	4.4171	2.7854	4.1459	1.1796	2.4136	2.6915	3.9892	0.678988	0.190497
LRECELSPGVNR	Q9BXP5	Serrate RNA effector molecule homolog OS=Homo sapiens OX=9606 GN=SRRT PE=1 SV=1	2.3647	2.673	2.3291	1.7226	2.348	1.7533	2.2004	3.709	1.10136	0.638739
SLALEWACSGIR	Q9BY49	Peroxisomal trans-2-enoyl-CoA reductase OS=Homo sapiens OX=9606 GN=PECR PE=1 SV=2	1.8208	1.0132	1.2626	NA	0.9659	0.9801	1.366	NA	0.808475	0.391303
THASMIIFEPANAFGECSGYIER	Q9GZU2	Paternally-expressed gene 3 protein OS=Homo sapiens OX=9606 GN=PEG3 PE=1 SV=1	8.6047	9.2155	6.828	7.6662	6.0355	9.8899	NA	10.9943	1.11074	0.551597
VCEETFIPGQSLK	Q9GZU2	Paternally-expressed gene 3 protein OS=Homo sapiens OX=9606 GN=PEG3 PE=1 SV=1	2.4584	4.509	2.8035	3.0359	1.8028	2.3915	2.3938	2.7173	0.726598	0.124379
GCDDGFIALLPMKPR	Q9GZU2	Paternally-expressed gene 3 protein OS=Homo sapiens OX=9606 GN=PEG3 PE=1 SV=1	0.4234	0.3102	0.721	0.7981	0.3365	0.535	0.7762	0.7396	1.05975	0.835182
KYEDICPSTHNMDVPNIK	Q9GZV4	Eukaryotic translation initiation factor 5A-2 OS=Homo sapiens OX=9606 GN=EIF5A2 PE=1 SV=3	3.4534	3.8438	4.0306	NA	2.4422	2.7208	2.9838	NA	0.719186	0.010107
CTEPEDQLYYVK	Q9H3G5	Probable serine carboxypeptidase CPVL OS=Homo sapiens OX=9606 GN=CPVL PE=1 SV=2	0.1904	0.2033	0.2848	0.1941	0.1528	0.2797	0.3111	0.2538	1.14302	0.474615
EVIITPNSAWGGEGSLGCGIGYGYLHR	Q9H8Y8	Golgi reassembly-stacking protein 2 OS=Homo sapiens OX=9606 GN=GORASP2 PE=1 SV=3	1.0657	1.4043	1.8696	NA	1.1797	1.862	1.3153	1.3431	0.985131	0.93814
AVMEQIPEIQKDSLDQFDCK	Q9HAV4	Exportin-5 OS=Homo sapiens OX=9606 GN=XPO5 PE=1 SV=1	3.6721	2.0672	3.785	4.1445	3.4289	3.6902	4.7485	4.7276	1.21409	0.250727
LIAGCIGKPLGEQFRK	Q9HAV4	Exportin-5 OS=Homo sapiens OX=9606 GN=XPO5 PE=1 SV=1	0.6522	0.7214	1.2943	1.3861	0.7401	0.5045	2.2474	2.5286	1.4851	0.405097
ATQCVPKEEIKDDNPHLK	Q9HAV7	GrpE protein homolog 1, mitochondrial OS=Homo sapiens OX=9606 GN=GRPEL1 PE=1 SV=2	3.9453	4.8272	3.4696	4.3833	3.4873	5.1397	2.9731	4.6704	0.978653	0.883837
HYLGHTDCVK	Q9HC35	Echinoderm microtubule-associated protein-like 4 OS=Homo sapiens OX=9606 GN=EML4 PE=1 SV=3	20.9656	NA	17.3239	29.5877	25.7256	11.2535	14.056	20.3331	0.788573	0.37338
CLAIHPDKIR	Q9HC35	Echinoderm microtubule-associated protein-like 4 OS=Homo sapiens OX=9606 GN=EML4 PE=1 SV=3	0.2227	0.3103	0.3293	0.5398	0.465	0.3464	0.2736	0.658	1.24314	0.458223
GVGCLDFSK	Q9HC35	Echinoderm microtubule-associated protein-like 4 OS=Homo sapiens OX=9606 GN=EML4 PE=1 SV=3	NA	1.3427	1.2953	2.0369	NA	1.094	0.9733	1.6408	0.793193	0.364974
LVDEPGHCADFHPSGTVVAIGTHSGR	Q9HC35	Echinoderm microtubule-associated protein-like 4 OS=Homo sapiens OX=9606 GN=EML4 PE=1 SV=3	NA	0.3419	0.3226	0.4216	NA	0.3534	0.3996	0.398	1.05976	0.557769
SPQENLVPCDVLLLR	Q9HD20	Manganese-transporting ATPase 13A1 OS=Homo sapiens OX=9606 GN=ATP13A1 PE=1 SV=2	0.2911	0.5243	0.8103	0.7824	0.1513	0.7169	0.8696	0.7037	1.01387	0.96794
NLSGQPNFPCR	Q9HD45	Transmembrane 9 superfamily member 3 OS=Homo sapiens OX=9606 GN=TM9SF3 PE=1 SV=2	2.9571	3.2433	3.5024	2.5441	2.3687	2.578	3.8247	2.5722	0.926243	0.58492
YSNSALGHVNCTIK	Q9NQC3	Reticulon-4 OS=Homo sapiens OX=9606 GN=RTN4 PE=1 SV=2	0.5237	0.6902	0.3758	0.7234	0.5985	0.3831	0.4225	0.6342	0.881198	0.525262
CCMPYTPICIAK	Q9NQW7	Xaa-Pro aminopeptidase 1 OS=Homo sapiens OX=9606 GN=XPNPEP1 PE=1 SV=3	0.2278	0.259	0.2192	0.2062	0.2824	0.2772	0.2581	0.2362	1.15534	0.0606382
LSVACFYGGTPYGGQFER	Q9NR30	Nucleolar RNA helicase 2 OS=Homo sapiens OX=9606 GN=DDX21 PE=1 SV=5	1.4659	1.5889	2.7908	2.9135	0.7104	1.5702	1.8722	1.8855	0.689374	0.200496
QLLPCEMACNEK	Q9NR45	Sialic acid synthase OS=Homo sapiens OX=9606 GN=NANS PE=1 SV=2	15.4994	18.8127	11.5575	NA	14.4093	13.3637	7.9926	7.2196	0.702838	0.164222
VPFLVLECPNLK	Q9NRP0	Oligosaccharyltransferase complex subunit OSTC OS=Homo sapiens OX=9606 GN=OSTC PE=1 SV=1	4.2129	3.6018	3.7721	5.095	5.4207	3.0789	2.4487	3.1554	0.845454	0.412343
YTAESSDTLCPR	Q9NSE4	Isoleucine--tRNA ligase, mitochondrial OS=Homo sapiens OX=9606 GN=IARS2 PE=1 SV=2	NA	0.3229	0.4434	0.559	0.3984	0.2571	0.5465	0.423	0.919603	0.710765
STFFNVLTNSQASAENFPFCTIDPNESR	Q9NTK5	Obg-like ATPase 1 OS=Homo sapiens OX=9606 GN=OLA1 PE=1 SV=2	6.0236	7.808	4.0308	4.3214	3.5939	4.0076	7.0847	4.386	0.859735	0.533039
TPCSSLLPLLNAHAATSGK	Q9NUQ6	SPATS2-like protein OS=Homo sapiens OX=9606 GN=SPATS2L PE=1 SV=2	24.4821	18.9174	23.339	NA	30.7266	21.68	21.1248	NA	1.10178	0.557705
VEPSDRYPQCLCLSPTYELALQTGK	Q9NUU7	ATP-dependent RNA helicase DDX19A OS=Homo sapiens OX=9606 GN=DDX19A PE=1 SV=1	NA	1.8	2.1483	2.2101	1.2614	1.5296	1.4022	1.5522	0.699703	0.00566163
LPEEEAECYFHSRPK	Q9NVS9	Pyridoxine-5'-phosphate oxidase OS=Homo sapiens OX=9606 GN=PNPO PE=1 SV=1	4.21219	3.75469	3.08365	3.60433	3.32199	4.75397	3.70513	5.26928	1.16346	0.283256
DFNLDGAPYGYTPFCDSR	Q9NYU2	UDP-glucose:glycoprotein glucosyltransferase 1 OS=Homo sapiens OX=9606 GN=UGGT1 PE=1 SV=3	0.0364	0.0641	NA	0.0833	0.0475	0.0578	0.0585	0.0139	0.725109	0.363114
GSQMGTVQPIPCLLSMPTR	Q9NZB2	Constitutive coactivator of PPAR-gamma-like protein 1 OS=Homo sapiens OX=9606 GN=FAM120A PE=1 SV=2	3.665	NA	2.8198	2.5057	3.097	5.1292	6.0651	3.5897	1.49166	0.147809
LMEECKR	Q9P0L0	Vesicle-associated membrane protein-associated protein A OS=Homo sapiens OX=9606 GN=VAPA PE=1 SV=3	2.9125	4.76981	3.35591	2.84591	2.55325	2.68378	2.61138	2.49364	0.744883	0.0962405
VSYHHGNHADPEERDCPTAR	Q9P0Z9	Peroxisomal sarcosine oxidase OS=Homo sapiens OX=9606 GN=PIPOX PE=1 SV=2	29.0931	NA	33.2292	33.5945	12.9216	15.2539	27.4658	NA	0.5801	0.0470983
KGTQCVEQIQELVLR	Q9P287	BRCA2 and CDKN1A-interacting protein OS=Homo sapiens OX=9606 GN=BCCIP PE=1 SV=1	NA	6.132	4.999	3.0938	NA	10.1117	8.6128	5.2357	1.6844	0.127683
AMEALATAEQACKEK	Q9P2E9	Ribosome-binding protein 1 OS=Homo sapiens OX=9606 GN=RRBP1 PE=1 SV=4	NA	2.12782	2.08001	2.14413	1.61255	1.729	1.3739	1.60297	0.74604	0.00182486
ELCHTQSSHASLRADAEKAQEQQQQMAELHSK	Q9P2E9	Ribosome-binding protein 1 OS=Homo sapiens OX=9606 GN=RRBP1 PE=1 SV=4	2.7755	3.6282	3.4741	NA	3.7916	3.5768	3.5585	4.8533	1.19816	0.185125
SKCEELSGLHGQLQEAR	Q9P2E9	Ribosome-binding protein 1 OS=Homo sapiens OX=9606 GN=RRBP1 PE=1 SV=4	3.1187	2.205	1.9951	4.1604	3.3535	2.2355	5.1329	3.5134	1.2401	0.408205
EAEETQSTLQAECDQYR	Q9P2E9	Ribosome-binding protein 1 OS=Homo sapiens OX=9606 GN=RRBP1 PE=1 SV=4	NA	0.185926	0.544423	0.533483	0.043522	0.060076	0.229939	0.261543	0.353141	0.0706642
LTAEFEEAQTSACR	Q9P2E9	Ribosome-binding protein 1 OS=Homo sapiens OX=9606 GN=RRBP1 PE=1 SV=4	NA	3.71605	2.23237	2.72632	7.18532	8.79234	5.3444	4.1625	2.20334	0.0397184
ETTNIFSNCGCVR	Q9UBB4	Ataxin-10 OS=Homo sapiens OX=9606 GN=ATXN10 PE=1 SV=1	0.8433	0.6191	NA	0.7541	0.9175	0.5784	0.9935	0.6923	1.0766	0.673536
FQMTQEVVCDECPNVK	Q9UBS4	DnaJ homolog subfamily B member 11 OS=Homo sapiens OX=9606 GN=DNAJB11 PE=1 SV=1	0.1052	0.0951	0.1481	NA	NA	0.2261	0.2461	0.2592	2.09931	0.00249661
GVTECYECHPKPTQR	Q9UBT2	SUMO-activating enzyme subunit 2 OS=Homo sapiens OX=9606 GN=UBA2 PE=1 SV=2	NA	1.2683	1.5151	1.5061	NA	0.6993	1.4439	1.153	0.768435	0.225439
NTPSEPIHCIVWAK	Q9UBT2	SUMO-activating enzyme subunit 2 OS=Homo sapiens OX=9606 GN=UBA2 PE=1 SV=2	0.7796	0.5561	0.7497	0.6312	0.3138	0.264	NA	0.4349	0.497043	0.00602073
YCAYNIGDQSAINELMQMR	Q9UHB9	Signal recognition particle subunit SRP68 OS=Homo sapiens OX=9606 GN=SRP68 PE=1 SV=2	6.9164	6.2481	3.9983	3.551	2.1956	3.5578	4.7819	5.4556	0.771993	0.322323
FETFCLDPSLVTK	Q9UHB9	Signal recognition particle subunit SRP68 OS=Homo sapiens OX=9606 GN=SRP68 PE=1 SV=2	7.8561	4.0393	5.7569	6.1928	7.9889	7.7272	6.1925	NA	1.22505	0.253323
VLAALPAAELVQACR	Q9UK22	F-box only protein 2 OS=Homo sapiens OX=9606 GN=FBXO2 PE=1 SV=2	NA	27.4269	23.8578	24.8814	NA	35.8534	27.0362	22.5192	1.12135	0.489867
CGFLPGNEK	Q9UL46	Proteasome activator complex subunit 2 OS=Homo sapiens OX=9606 GN=PSME2 PE=1 SV=4	20.5794	27.0081	24.5921	NA	15.7405	NA	23.8153	16.5703	0.77759	0.16737
ISASCQHPTAFEEAIPK	Q9ULA0	Aspartyl aminopeptidase OS=Homo sapiens OX=9606 GN=DNPEP PE=1 SV=1	2.15922	2.30233	1.40644	2.09262	1.95272	2.07586	1.49152	NA	0.924569	0.613563
GSFEELCQNQVVR	Q9ULC5	Long-chain-fatty-acid--CoA ligase 5 OS=Homo sapiens OX=9606 GN=ACSL5 PE=1 SV=1	NA	1.8353	1.6821	1.9694	NA	1.2752	1.2571	1.396	0.715955	0.00518627
SIKDTICNQDER	Q9ULV4	Coronin-1C OS=Homo sapiens OX=9606 GN=CORO1C PE=1 SV=1	0.5052	0.34	0.3701	0.2546	0.6038	0.2868	0.1361	0.1384	0.792639	0.554159
IWSVPNASCVQVVR	Q9UMS4	Pre-mRNA-processing factor 19 OS=Homo sapiens OX=9606 GN=PRPF19 PE=1 SV=1	0.6023	0.5914	0.6914	0.8968	0.4301	0.6932	NA	0.603	0.827396	0.307686
MGVVECAK	Q9UQ80	Proliferation-associated protein 2G4 OS=Homo sapiens OX=9606 GN=PA2G4 PE=1 SV=3	0.2283	0.3393	0.4232	0.3267	0.2118	0.4334	0.3063	0.2514	0.913017	0.663541
AAHLCAEAALR	Q9UQ80	Proliferation-associated protein 2G4 OS=Homo sapiens OX=9606 GN=PA2G4 PE=1 SV=3	NA	0.1691	0.1636	0.177	0.1146	0.2067	0.1006	0.149	0.840053	0.378579
MGVVECAK	Q9UQ80	Proliferation-associated protein 2G4 OS=Homo sapiens OX=9606 GN=PA2G4 PE=1 SV=3	0.2283	0.3393	0.4232	0.3267	0.2118	0.4334	0.3063	0.2514	0.913017	0.663541
VAHSFNCTPIEGMLSHQLK	Q9UQ80	Proliferation-associated protein 2G4 OS=Homo sapiens OX=9606 GN=PA2G4 PE=1 SV=3	NA	0.1737	0.2176	0.1856	NA	0.21	0.1851	0.2254	1.07558	0.455285
MQKGDPQVYEELFSYSCPK	Q9Y262	Eukaryotic translation initiation factor 3 subunit L OS=Homo sapiens OX=9606 GN=EIF3L PE=1 SV=1	0.4622	0.9028	0.4564	0.955	0.415	0.2994	0.5413	0.3937	0.594079	0.0996603
TYDPSGDSTLPTCSK	Q9Y2X3	Nucleolar protein 58 OS=Homo sapiens OX=9606 GN=NOP58 PE=1 SV=1	0.379549	0.793506	0.392877	0.588752	0.288299	0.363681	NA	0.30812	0.594117	0.1203
CVLPEEDSGELAKPK	Q9Y3F4	Serine-threonine kinase receptor-associated protein OS=Homo sapiens OX=9606 GN=STRAP PE=1 SV=1	8.5496	12.8397	NA	11.0635	NA	9.7837	12.6513	13.0886	1.09462	0.561704
QVAASTAQLLVACK	Q9Y4G6; Q9Y490	Talin-1 OS=Homo sapiens OX=9606 GN=TLN1 PE=1 SV=3	10.1163	7.8001	9.4406	23.321	14.0932	11.8963	8.3488	7.113	0.817935	0.578301
AVTDSINQLITMCTQQAPGQK	Q9Y490	Talin-1 OS=Homo sapiens OX=9606 GN=TLN1 PE=1 SV=3	5.8072	3.3141	3.5227	8.8935	5.3987	7.2872	7.8872	NA	1.27363	0.415416
TMQFEPSTMVYDACR	Q9Y490	Talin-1 OS=Homo sapiens OX=9606 GN=TLN1 PE=1 SV=3	9.4643	6.3866	11.7625	NA	9.8081	NA	10.4418	10.0791	1.09834	0.594698
ALEATTEHIRQELAVFCSPEPPAK	Q9Y490	Talin-1 OS=Homo sapiens OX=9606 GN=TLN1 PE=1 SV=3	7.984	8.121	6.7409	7.3003	5.7094	8.6418	7.9344	7.1254	0.975612	0.803333
ASVPTIQDQASAMQLSQCAK	Q9Y490	Talin-1 OS=Homo sapiens OX=9606 GN=TLN1 PE=1 SV=3	NA	1.5987	3.3531	2.8252	NA	2.9085	2.8088	3.0239	1.12398	0.572357
LCSGPGIVGNVLVDPSAR	Q9Y5P6	Mannose-1-phosphate guanyltransferase beta OS=Homo sapiens OX=9606 GN=GMPPB PE=1 SV=2	4.5912	7.8283	NA	19.117	6.8749	7.2553	13.9719	NA	0.891098	0.829112
NKHEMVVYEAASAIVNLPGCSAK	Q9Y678	Coatomer subunit gamma-1 OS=Homo sapiens OX=9606 GN=COPG1 PE=1 SV=1	0.3721	0.6455	0.5596	NA	0.4814	0.4144	4.6039	2.0245	3.57795	0.296257
FLGMHPCER	Q9Y678	Coatomer subunit gamma-1 OS=Homo sapiens OX=9606 GN=COPG1 PE=1 SV=1	0.0536	0.0536	0.0682	0.0993	0.0605	0.0462	0.079	0.0689	0.926829	0.708489
FLDGNEMTLADCNLLPK	Q9Y696	Chloride intracellular channel protein 4 OS=Homo sapiens OX=9606 GN=CLIC4 PE=1 SV=4	1.1128	1.0591	0.7746	0.914	0.6214	0.9257	0.9422	0.9016	0.878358	0.316706
AGSDGESIGNCPFSQR	Q9Y696	Chloride intracellular channel protein 4 OS=Homo sapiens OX=9606 GN=CLIC4 PE=1 SV=4	2.9056	7.4269	10.9963	3.5783	4.1022	0.0201	8.3595	NA	0.668179	0.521303
ANFIEADKYFLPFELACQSK	Q9Y6D5	Brefeldin A-inhibited guanine nucleotide-exchange protein 2 OS=Homo sapiens OX=9606 GN=ARFGEF2 PE=1 SV=3	0.8445	6.0805	4.8628	NA	2.8551	3.2073	4.4632	4.8706	0.979585	0.957807

## Sheet: Significant
Peptide	Accesion	Protein Name	Cys	Fold Change	pvalue
LGLDPTQEDCVATHR	P52789	Hexokinase-2 OS=Homo sapiens OX=9606 GN=HK2 PE=1 SV=2	368	0.446217	1.62947e-05
NMMAACDPR	Q13885; Q13509; P04350; Q9BUF5; P07437; P68371; Q9BVA1	Tubulin beta-8 chain OS=Homo sapiens OX=9606 GN=TUBB8 PE=1 SV=2		0.807791	0.000206368
AAQDFFSTCR	P06132	Uroporphyrinogen decarboxylase OS=Homo sapiens OX=9606 GN=UROD PE=1 SV=2	59	2.35356	0.000295691
CATITPDEK	O75874	Isocitrate dehydrogenase [NADP] cytoplasmic OS=Homo sapiens OX=9606 GN=IDH1 PE=1 SV=2	73	5.10938	0.000385131
FFSDCKIQNGAQGIR	P31943	Heterogeneous nuclear ribonucleoprotein H OS=Homo sapiens OX=9606 GN=HNRNPH1 PE=1 SV=4	34	0.615956	0.000544021
DYTGCSTSESLSPVK	O95297	Myelin protein zero-like protein 1 OS=Homo sapiens OX=9606 GN=MPZL1 PE=1 SV=1	203	2.06577	0.000773445
ACQSIYPLHDVFVR	P61247	40S ribosomal protein S3a OS=Homo sapiens OX=9606 GN=RPS3A PE=1 SV=2	201	0.566665	0.000951599
LAGECGGK	P30038	Delta-1-pyrroline-5-carboxylate dehydrogenase, mitochondrial OS=Homo sapiens OX=9606 GN=ALDH4A1 PE=1 SV=3	315	0.386935	0.00113977
ICQFLGK	Q06520	Bile salt sulfotransferase OS=Homo sapiens OX=9606 GN=SULT2A1 PE=1 SV=3	199	0.548333	0.00116607
DRTDIQCLIPCAIDQDPYFR	P23381	Tryptophan--tRNA ligase, cytoplasmic OS=Homo sapiens OX=9606 GN=WARS PE=1 SV=2	305-309	0.536287	0.00118438
FFLGDLCSR	Q15738	Sterol-4-alpha-carboxylate 3-dehydrogenase, decarboxylating OS=Homo sapiens OX=9606 GN=NSDHL PE=1 SV=2	86	0.534202	0.00124404
LIQSHPESAEDLQEKCTELNQAWSSLGK	Q13813	Spectrin alpha chain, non-erythrocytic 1 OS=Homo sapiens OX=9606 GN=SPTAN1 PE=1 SV=3	314	3.20993	0.00165501
AMEALATAEQACKEK	Q9P2E9	Ribosome-binding protein 1 OS=Homo sapiens OX=9606 GN=RRBP1 PE=1 SV=4	1038	0.74604	0.00182486
NIHESCMSQIGWNR	P11413	Glucose-6-phosphate 1-dehydrogenase	158	0.662463	0.0019164
HSDGNLCVK	P49458	Signal recognition particle 9 kDa protein OS=Homo sapiens OX=9606 GN=SRP9 PE=1 SV=2	39	1.35342	0.00237293
FQMTQEVVCDECPNVK	Q9UBS4	DnaJ homolog subfamily B member 11 OS=Homo sapiens OX=9606 GN=DNAJB11 PE=1 SV=1	193-196	2.09931	0.00249661
TIPMDGQHFCFTR	P30837	Aldehyde dehydrogenase X, mitochondrial OS=Homo sapiens OX=9606 GN=ALDH1B1 PE=1 SV=3	169	0.409719	0.00259368
CIPALDSLTPANEDQK	P10809	60 kDa heat shock protein, mitochondrial OS=Homo sapiens OX=9606 GN=HSPD1 PE=1 SV=2	447	0.212555	0.00262041
ECENCDCLQGFQLTHSLGGGTGSGMGTLLISK	Q13509	Tubulin beta-3 chain OS=Homo sapiens OX=9606 GN=TUBB3 PE=1 SV=2	124-127-129	3.90327	0.0028298
ADEASELACPTPK	P49327	Fatty acid synthase OS=Homo sapiens OX=9606 GN=FASN PE=1 SV=3	2202	1.79312	0.00304273
KPVEEYANCHLAR	P02787	Serotransferrin OS=Homo sapiens OX=9606 GN=TF PE=1 SV=3	596	0.6194	0.00315515
IGPSILNSDLANLGAECLR	Q96AT9	Ribulose-phosphate 3-epimerase OS=Homo sapiens OX=9606 GN=RPE PE=1 SV=1	23	1.51559	0.00353624
VAGDCLDEKQCK	Q96AG4	Leucine-rich repeat-containing protein 59 OS=Homo sapiens OX=9606 GN=LRRC59 PE=1 SV=1	131-137	0.291775	0.00363157
SGSCSAIR	O76021	Ribosomal L1 domain-containing protein 1 OS=Homo sapiens OX=9606 GN=RSL1D1 PE=1 SV=3	211	0.485036	0.00366335
QAGEVVCEAIKNEMNVMLK	P29218	Inositol monophosphatase 1 OS=Homo sapiens OX=9606 GN=IMPA1 PE=1 SV=1	24	1.68152	0.00388027
AICDHVR	P40925	Malate dehydrogenase, cytoplasmic OS=Homo sapiens OX=9606 GN=MDH1 PE=1 SV=4	251	0.532395	0.00508192
TLETANCMSSQTK	P50416	Carnitine O-palmitoyltransferase 1, liver isoform OS=Homo sapiens OX=9606 GN=CPT1A PE=1 SV=2	96	0.293892	0.0051019
GSFEELCQNQVVR	Q9ULC5	Long-chain-fatty-acid--CoA ligase 5 OS=Homo sapiens OX=9606 GN=ACSL5 PE=1 SV=1	610	0.715955	0.00518627
SAGACTAAAFLKEFVTHPK	P28838	Cytosol aminopeptidase OS=Homo sapiens OX=9606 GN=LAP3 PE=1 SV=3	462	0.787767	0.00555424
VEPSDRYPQCLCLSPTYELALQTGK	Q9NUU7	ATP-dependent RNA helicase DDX19A OS=Homo sapiens OX=9606 GN=DDX19A PE=1 SV=1	164-166	0.699703	0.00566163
NILGGTVFREPIICK	P48735	Isocitrate dehydrogenase [NADP], mitochondrial OS=Homo sapiens OX=9606 GN=IDH2 PE=1 SV=2	154	0.385355	0.00566252
NTPSEPIHCIVWAK	Q9UBT2	SUMO-activating enzyme subunit 2 OS=Homo sapiens OX=9606 GN=UBA2 PE=1 SV=2	185	0.497043	0.00602073
FIFDCVSQEYGINPER	A6NDG6	Glycerol-3-phosphate phosphatase OS=Homo sapiens OX=9606 GN=PGP PE=1 SV=1	243	0.379582	0.00641343
ALVDHENVISCPHLGASTK	O43175	D-3-phosphoglycerate dehydrogenase OS=Homo sapiens OX=9606 GN=PHGDH PE=1 SV=4	281	0.51489	0.00689244
VGMGSGSICITQEVLACGRPQATAVYK	P12268	Inosine-5'-monophosphate dehydrogenase 2 OS=Homo sapiens OX=9606 GN=IMPDH2 PE=1 SV=2	331-339	2.8795	0.00744919
TVCDAAEK	O60664	Perilipin-3 OS=Homo sapiens OX=9606 GN=PLIN3 PE=1 SV=3	60	0.774232	0.00778951
AGIICQLNAR	P33991	DNA replication licensing factor MCM4 OS=Homo sapiens OX=9606 GN=MCM4 PE=1 SV=5	605	0.583413	0.00843726
CEFQDAYVLLSEK	P10809	60 kDa heat shock protein, mitochondrial OS=Homo sapiens OX=9606 GN=HSPD1 PE=1 SV=2	237	0.507173	0.00895444
CDFPIMK	Q04760	Lactoylglutathione lyase OS=Homo sapiens OX=9606 GN=GLO1 PE=1 SV=4	61	1.81482	0.00895444
VLEFNCR	P22102	Trifunctional purine biosynthetic protein adenosine-3 OS=Homo sapiens OX=9606 GN=GART PE=1 SV=1	291	0.775988	0.00911123
IHMGSCAENTAK	P24752	Acetyl-CoA acetyltransferase, mitochondrial OS=Homo sapiens OX=9606 GN=ACAT1 PE=1 SV=1	196	2.09702	0.00984739
KYEDICPSTHNMDVPNIK	Q9GZV4	Eukaryotic translation initiation factor 5A-2 OS=Homo sapiens OX=9606 GN=EIF5A2 PE=1 SV=3	73	0.719186	0.010107
ASCSALMSQPSAPDFVQR	P46939	Utrophin OS=Homo sapiens OX=9606 GN=UTRN PE=1 SV=2	862	1.62396	0.0106179
AVPTGDMEDLPCGLVLSSIGYK	P22570	NADPH:adrenodoxin oxidoreductase, mitochondrial OS=Homo sapiens OX=9606 GN=FDXR PE=1 SV=3	353	0.629753	0.0107127
TDDCHPWVLPVVK	P17174	Aspartate aminotransferase, cytoplasmic OS=Homo sapiens OX=9606 GN=GOT1 PE=1 SV=3	46	1.6924	0.0107872
GCGTVLLSGPR	Q07020	60S ribosomal protein L18 OS=Homo sapiens OX=9606 GN=RPL18 PE=1 SV=2	134	1.4048	0.0111172
EVPTTLKECIQEPSSVSQTR	P46939	Utrophin OS=Homo sapiens OX=9606 GN=UTRN PE=1 SV=2	2185	1.28254	0.0115336
LQGINCGPDFTPSFANLGR	Q04637	Eukaryotic translation initiation factor 4 gamma 1 OS=Homo sapiens OX=9606 GN=EIF4G1 PE=1 SV=4	662	0.541088	0.0117898
ASLNGADIYSGCCTLK	P14866	Heterogeneous nuclear ribonucleoprotein L OS=Homo sapiens OX=9606 GN=HNRNPL PE=1 SV=2	260-261	3.47029	0.0118579
GIHFCHDLVSLCNFHNYDNLR	O94925	Glutaminase kidney isoform, mitochondrial OS=Homo sapiens OX=9606 GN=GLS PE=1 SV=1	518-525	0.743877	0.0122351
YKPVCNQVECHPYFNR	P42330	Aldo-keto reductase family 1 member C3 OS=Homo sapiens OX=9606 GN=AKR1C3 PE=1 SV=4	188	0.563678	0.0124946
WFLTCINQPQFR	P26641	Elongation factor 1-gamma OS=Homo sapiens OX=9606 GN=EEF1G PE=1 SV=3	194	0.563994	0.012627
CPLLKPWALTFSYGR	P04075	Fructose-bisphosphate aldolase A OS=Homo sapiens OX=9606 GN=ALDOA PE=1 SV=2	290	1.69912	0.0127968
DMGSCEIYPQTIQHNPNGR	P35606	Coatomer subunit beta' OS=Homo sapiens OX=9606 GN=COPB2 PE=1 SV=2	351	0.710651	0.0128167
YCQEPR	P42704	Leucine-rich PPR motif-containing protein, mitochondrial OS=Homo sapiens OX=9606 GN=LRPPRC PE=1 SV=3	571	0.654199	0.0128525
ASFENNCEIGCFAK	P56537	Eukaryotic translation initiation factor 6 OS=Homo sapiens OX=9606 GN=EIF6 PE=1 SV=1	11-15	0.700092	0.0130901
YHQIGSGKCEIK	O14979	Heterogeneous nuclear ribonucleoprotein D-like OS=Homo sapiens OX=9606 GN=HNRNPDL PE=1 SV=3	303	0.503463	0.0135936
WLKEDKLECSEELGDLVK	Q00610	Clathrin heavy chain 1 OS=Homo sapiens OX=9606 GN=CLTC PE=1 SV=5	459	0.664148	0.0142686
CLSSLKDER	P52209	6-phosphogluconate dehydrogenase, decarboxylating OS=Homo sapiens OX=9606 GN=PGD PE=1 SV=3	289	1.2291	0.014296
KNVFVEFYAPWCGHCK	P07237	Protein disulfide-isomerase OS=Homo sapiens OX=9606 GN=P4HB PE=1 SV=3	397-400	0.581171	0.0146834
GCSGDEREMAK	P09327	Villin-1 OS=Homo sapiens OX=9606 GN=VIL1 PE=1 SV=4	562	0.403822	0.0159358
YMACCLLYRGDVVPK	Q71U36; Q9BQE3; P68366	Tubulin alpha-4A chain OS=Homo sapiens OX=9606 GN=TUBA4A PE=1 SV=1	315-316	1.66838	0.0167423
LGYAGNTEPQFIIPSCIAIK	P61158	Actin-related protein 3 OS=Homo sapiens OX=9606 GN=ACTR3 PE=1 SV=3	34	0.800809	0.0170036
CMPTFQFFK	P10599	Thioredoxin OS=Homo sapiens OX=9606 GN=TXN PE=1 SV=3	71	0.818519	0.0171056
LGIGMDTCVIPLR	P49903	Selenide, water dikinase 1 OS=Homo sapiens OX=9606 GN=SEPHS1 PE=1 SV=2	71	0.629231	0.0172893
MTNGFSGADLTEICQR	P55072	Transitional endoplasmic reticulum ATPase OS=Homo sapiens OX=9606 GN=VCP PE=1 SV=4	691	0.742477	0.0177946
MCPQLQQYEMHGPEGLR	P01023	Alpha-2-macroglobulin OS=Homo sapiens OX=9606 GN=A2M PE=1 SV=3	30	0.839386	0.0179092
GCHLLVATPGR	O00571	ATP-dependent RNA helicase DDX3X OS=Homo sapiens OX=9606 GN=DDX3X PE=1 SV=3	317	0.621473	0.0182176
VLISDSLDPCCR	O43175	D-3-phosphoglycerate dehydrogenase OS=Homo sapiens OX=9606 GN=PHGDH PE=1 SV=4	18-19	0.477737	0.018259
AAVEEGIVLGGGCALLR	P10809	60 kDa heat shock protein, mitochondrial OS=Homo sapiens OX=9606 GN=HSPD1 PE=1 SV=2	442	0.926671	0.0185293
VLSECSPLMNDIFNK	P53618	Coatomer subunit beta OS=Homo sapiens OX=9606 GN=COPB1 PE=1 SV=3	623	0.658526	0.0187503
CLSVMEAK	P49588	Alanine--tRNA ligase, cytoplasmic OS=Homo sapiens OX=9606 GN=AARS PE=1 SV=2	773	0.618507	0.0194613
GACAGSEDAVK	Q13813	Spectrin alpha chain, non-erythrocytic 1 OS=Homo sapiens OX=9606 GN=SPTAN1 PE=1 SV=3	1622	0.725088	0.0196903
GHALLIDCR	P51570	Galactokinase OS=Homo sapiens OX=9606 GN=GALK1 PE=1 SV=1	203	1.84448	0.0203752
YGETANECGEAFFFYGK	P49321	Nuclear autoantigenic sperm protein OS=Homo sapiens OX=9606 GN=NASP PE=1 SV=2	84	0.523005	0.0212814
VCTLAIIDPGDSDIIR	P62888	60S ribosomal protein L30 OS=Homo sapiens OX=9606 GN=RPL30 PE=1 SV=2	92	0.459574	0.0217912
DINAYNCEEPTEK	P30041	Peroxiredoxin-6 OS=Homo sapiens OX=9606 GN=PRDX6 PE=1 SV=3	91	0.516169	0.0217996
AVYSTNCPVWEEAFR	Q9BSJ8	Extended synaptotagmin-1 OS=Homo sapiens OX=9606 GN=ESYT1 PE=1 SV=1	522	1.99218	0.0223275
SPYTVTVGQACNPSACR	P21333	Filamin-A OS=Homo sapiens OX=9606 GN=FLNA PE=1 SV=4	478-483	1.46788	0.0227671
VWNLANCK	P63244	Receptor of activated protein C kinase 1 OS=Homo sapiens OX=9606 GN=RACK1 PE=1 SV=3	182	1.20663	0.0227693
EATDPRPCEVENAVESWR	P47755	F-actin-capping protein subunit alpha-2 OS=Homo sapiens OX=9606 GN=CAPZA2 PE=1 SV=3	111	0.677294	0.0233322
CRDDSFFGETSHNYHKFDSEYER	P43243	Matrin-3 OS=Homo sapiens OX=9606 GN=MATR3 PE=1 SV=2	230	0.645501	0.02432
NCPHIVVGTPGR	Q13838	Spliceosome RNA helicase DDX39B OS=Homo sapiens OX=9606 GN=DDX39B PE=1 SV=1	165	1.52494	0.0243588
ICDDELILIK	P17987	T-complex protein 1 subunit alpha OS=Homo sapiens OX=9606 GN=TCP1 PE=1 SV=1	357	0.824575	0.0245325
VCLLGCGFSTGYGAAINNAK	P08319	Alcohol dehydrogenase 4 OS=Homo sapiens OX=9606 GN=ADH4 PE=1 SV=5	176-180	2.45126	0.0245794
ATLITFLCDR	P11717	Cation-independent mannose-6-phosphate receptor OS=Homo sapiens OX=9606 GN=IGF2R PE=1 SV=3	731	0.315804	0.0246877
VGTECGNQK	P21333	Filamin-A OS=Homo sapiens OX=9606 GN=FLNA PE=1 SV=4	574	3.92628	0.0267681
LCQPEGIHICDGTEAENTATLTLLEQQGLIR	Q16822	Phosphoenolpyruvate carboxykinase [GTP], mitochondrial OS=Homo sapiens OX=9606 GN=PCK2 PE=1 SV=4	55-63	1.29658	0.02787
GFGYKGSCFHR	P62937	Peptidyl-prolyl cis-trans isomerase A OS=Homo sapiens OX=9606 GN=PPIA PE=1 SV=2	53	0.547476	0.0287503
TCFSMVPALQQELDSRPQLR	Q96AB3	Isochorismatase domain-containing protein 2 OS=Homo sapiens OX=9606 GN=ISOC2 PE=1 SV=1	84	1.34626	0.0292431
LGVENCYFPMFVSQSALEK	P07814	Bifunctional glutamate/proline--tRNA ligase OS=Homo sapiens OX=9606 GN=EPRS PE=1 SV=5	1076	0.339636	0.0330509
SGDAAIVDMVPGKPMCVESFSDYPPLGR	P68104	Elongation factor 1-alpha 1 OS=Homo sapiens OX=9606 GN=EEF1A1 PE=1 SV=1	411	0.851243	0.0341647
RQCEEVAR	P51570	Galactokinase OS=Homo sapiens OX=9606 GN=GALK1 PE=1 SV=1	243	0.650265	0.0348136
LEYCEALAMLR	P14868	Aspartate--tRNA ligase, cytoplasmic OS=Homo sapiens OX=9606 GN=DARS PE=1 SV=2	349	0.657441	0.0352091
YCRPESQEHPEADPGSAAPYLK	P40763	Signal transducer and activator of transcription 3 OS=Homo sapiens OX=9606 GN=STAT3 PE=1 SV=2	687	1.28024	0.0353659
EALNSCNKR	P19338	Nucleolin OS=Homo sapiens OX=9606 GN=NCL PE=1 SV=3	543	0.68509	0.036834
ACYALENFVENLGPK	Q8TEX9	Importin-4 OS=Homo sapiens OX=9606 GN=IPO4 PE=1 SV=2	459	0.781013	0.0368861
YVLCTAPR	P25205	DNA replication licensing factor MCM3 OS=Homo sapiens OX=9606 GN=MCM3 PE=1 SV=3	360	0.633668	0.0371726
SSGGFVWACK	P48735	Isocitrate dehydrogenase [NADP], mitochondrial OS=Homo sapiens OX=9606 GN=IDH2 PE=1 SV=2	308	1.39769	0.0378816
VVVFIKPTCPYCR	P35754	Glutaredoxin-1 OS=Homo sapiens OX=9606 GN=GLRX PE=1 SV=2	23-24	1.24205	0.0380536
LHIVQVVCKK	O00299	Chloride intracellular channel protein 1 OS=Homo sapiens OX=9606 GN=CLIC1 PE=1 SV=4	191	1.75863	0.038335
MQHLNPDPQLIPEQITTDITPECLVSPR	Q96AC1	Fermitin family homolog 2 OS=Homo sapiens OX=9606 GN=FERMT2 PE=1 SV=1	520	0.784691	0.0383624
DLPIKLNQWCNVVR	P07814	Bifunctional glutamate/proline--tRNA ligase OS=Homo sapiens OX=9606 GN=EPRS PE=1 SV=5	1148	0.681811	0.039155
SSEHINEGETAMLVCK	P35613	Basigin OS=Homo sapiens OX=9606 GN=BSG PE=1 SV=2	242	0.609839	0.0394847
LTAEFEEAQTSACR	Q9P2E9	Ribosome-binding protein 1 OS=Homo sapiens OX=9606 GN=RRBP1 PE=1 SV=4	1323	2.20334	0.0397184
SEGTYCCGPVPVR	P21980	Protein-glutamine gamma-glutamyltransferase 2 OS=Homo sapiens OX=9606 GN=TGM2 PE=1 SV=2	370-371	0.581642	0.040002
LGADMEDVCGR	P02649	Apolipoprotein E OS=Homo sapiens OX=9606 GN=APOE PE=1 SV=1	130	0.643001	0.0402903
AENAVECFQTK	P02771	Alpha-fetoprotein OS=Homo sapiens OX=9606 GN=AFP PE=1 SV=1	201	0.704478	0.0405165
CYLTMTQALEAR	Q14204	Cytoplasmic dynein 1 heavy chain 1 OS=Homo sapiens OX=9606 GN=DYNC1H1 PE=1 SV=5	1888	1.86326	0.0416968
NLADCLR	P49721	Proteasome subunit beta type-2 OS=Homo sapiens OX=9606 GN=PSMB2 PE=1 SV=1	91	1.27573	0.0422226
ECNPPNSQPASYQR	Q13427	Peptidyl-prolyl cis-trans isomerase G OS=Homo sapiens OX=9606 GN=PPIG PE=1 SV=2	310	0.683772	0.042582
QAAPCVLFFDELDSIAK	P55072	Transitional endoplasmic reticulum ATPase OS=Homo sapiens OX=9606 GN=VCP PE=1 SV=4	572	0.712359	0.0427374
TDLVPAFQNLMKDCEAEVR	P30153	Serine/threonine-protein phosphatase 2A 65 kDa regulatory subunit A alpha isoform OS=Homo sapiens OX=9606 GN=PPP2R1A PE=1 SV=4	294	0.57	0.0429516
CISEVQANNVVLGQYVGNPDGEGEATK	P11413	Glucose-6-phosphate 1-dehydrogenase OS=Homo sapiens OX=9606 GN=G6PD PE=1 SV=4	294	0.454137	0.0442212
YCFPNYVGRPK	P42025	Beta-centractin OS=Homo sapiens OX=9606 GN=ACTR1B PE=1 SV=1	34	0.679445	0.044436
LAEQAERYDDMAACMK	P63104	14-3-3 protein zeta/delta OS=Homo sapiens OX=9606 GN=YWHAZ PE=1 SV=1	25	0.734685	0.0446312
APQCLGK	Q00839	Heterogeneous nuclear ribonucleoprotein U OS=Homo sapiens OX=9606 GN=HNRNPU PE=1 SV=6	562	0.707282	0.0448942
CGEEIAVQFVDMVK	O43175	D-3-phosphoglycerate dehydrogenase OS=Homo sapiens OX=9606 GN=PHGDH PE=1 SV=4	295	1.27617	0.0450838
VQYPQSQACK	Q14204	Cytoplasmic dynein 1 heavy chain 1 OS=Homo sapiens OX=9606 GN=DYNC1H1 PE=1 SV=5	633	1.34995	0.0470642
SYPLVCIAK	P23141	Liver carboxylesterase 1 OS=Homo sapiens OX=9606 GN=CES1 PE=1 SV=2	390	0.682685	0.0470909
VSYHHGNHADPEERDCPTAR	Q9P0Z9	Peroxisomal sarcosine oxidase OS=Homo sapiens OX=9606 GN=PIPOX PE=1 SV=2	285	0.5801	0.0470983
HSTGDTKVPFCLQSCVKPLK	O94925	Glutaminase kidney isoform, mitochondrial OS=Homo sapiens OX=9606 GN=GLS PE=1 SV=1	283-287	0.80456	0.0476874
ILLNACCPGWVR	P16152	Carbonyl reductase [NADPH] 1 OS=Homo sapiens OX=9606 GN=CBR1 PE=1 SV=3	226-227	1.64083	0.0481966
GCGEQTMIYLAPTLAASR	P0C0L4; P0C0L5	Complement C4-A OS=Homo sapiens OX=9606 GN=C4A PE=1 SV=2	1010	0.638897	0.0485234
VQVPNCDEIFYAGTGNLLLR	P53621	Coatomer subunit alpha OS=Homo sapiens OX=9606 GN=COPA PE=1 SV=2	453	6.85802	0.04875
SAPHLPGLMCLLR	Q8IZL8	Proline-, glutamic acid- and leucine-rich protein 1 OS=Homo sapiens OX=9606 GN=PELP1 PE=1 SV=2	71	0.652487	0.0493644
