# Supplementary material for: Peroxiredoxin 6 Down-Regulation Induces Metabolic Remodeling and Cell Cycle Arrest in HepG2 Cells
Source: MDPI journal article supplement (doi:10.3390/antiox8110505), 2019-10-23
Supplement: s1 [file Suppl. file 3-v2-1.xlsx]

## Sheet: EXPANATION
Biochemical Name*		Indicates a compound that has not been confirmed based on a standard, but we are confident in its identity.

## Sheet: FINAL 
Subfamily	Metabolites	NT				siRNA-Prdx6				Fold Change	pvalue
Glycolysis, Gluconeogenesis, and Pyruvate Metabolism	3-phosphoglycerate	NA	0.6066	0.7847	0.9418	1.1989	0.9429	1.4676	1.6734	1.69821	0.0454094
	dihydroxyacetone phosphate (DHAP)	NA	1.4395	1.072	1.4282	0.5248	0.3146	NA	0.5622	0.355763	0.00410505
	pyruvate	1.5892	NA	1.7604	1.3767	1.0064	1.0439	1.2478	0.972	0.677607	0.00774546
	fructose 1,6-diphosphate/glucose 1,6-diphosphate/myo-inositol diphosphates	3.6445	NA	3.6829	2.1352	3.3775	2.2907	NA	2.9175	0.90733	0.651154
	fructose-6-phosphate	NA	0.7968	0.5607	0.7572	0.7125	0.7381	0.5761	1.0275	1.0832	0.665595
	glucose	NA	0.5506	0.8554	0.7362	0.7801	NA	0.734	0.7125	1.0394	0.772385
	glucose 6-phosphate	1.2578	NA	0.68	1.36	0.9028	1.1665	0.9158	NA	0.905179	0.671851
	glycerate	NA	0.9672	1.3712	1.1546	0.988	0.9621	0.6352	1.3236	0.8393	0.37668
	lactate	1.4322	0.7252	0.8946	1.1719	0.882	1.1953	0.8102	1.0412	0.930112	0.69237
	phosphoenolpyruvate (PEP)	NA	0.6738	0.6436	0.7467	1.0345	NA	1.3315	1.1728	1.71445	0.00570721
Fructose, Mannose and Galactose Metabolism	fructose	NA	0.6606	0.6517	0.6074	0.4608	NA	0.3778	0.4473	0.669844	0.00228756
	galactonate	0.8189	0.4747	2.1521	1.6145	1.1543	1.2616	0.9673	1.6764	0.999881	0.999725
	mannitol/sorbitol	NA	0.4961	0.4093	0.5829	0.2973	0.6511	0.333	0.4778	0.886515	0.580102
	mannose	1.1355	1.1194	0.9701	1.0759	0.8947	0.9999	0.2558	1.052	0.744588	0.23409
TCA Cycle and Oxidative Phosphorylation	2-methylcitrate/homocitrate	NA	0.6214	1.2343	1.151	1.0682	1.0027	0.9862	1.0833	1.03279	0.88028
	alpha-ketoglutarate	1.9867	1.6054	1.0256	1.0271	0.7241	0.8107	0.6467	0.7291	0.515625	0.0608646
	citrate	1.0059	0.4476	1.3787	1.3349	1.2172	1.575	1.0018	1.3253	1.2285	0.379842
	acetylphosphate	0.8664	0.4394	0.9152	0.984	1.2843	1.4185	1.2176	1.2465	1.61214	0.0221826
	aconitate	0.999	NA	1.1212	1.1082	0.9153	1.2007	1.1888	1.0395	1.00924	0.904035
	fumarate	1.3832	1.1178	1.1712	1.2007	0.9676	1.226	1.1305	1.3494	0.95908	0.634404
	isocitric lactone	0.9261	0.9709	1.123	1.0938	1.0946	1.3165	1.0604	0.9665	1.07881	0.398482
	malate	1.0811	0.9061	0.9307	1.0154	1.0586	1.1695	1.1778	1.1619	1.16131	0.020706
	phosphate	1.0135	0.8983	0.8692	0.9783	1.022	0.7632	1.0277	1.0202	1.01963	0.81223
	succinate	0.5589	0.4731	1.0745	1.2919	1.0007	1.1375	1.042	1.1343	1.26957	0.333773
	succinylcarnitine (C4-DC)	NA	1.0121	0.7657	0.7413	0.8289	0.8245	0.7304	0.9581	0.994968	0.968296
Glutathione Metabolism	S-methylglutathione	NA	1.3977	0.726	0.7795	0.6866	0.8565	0.8634	0.997	0.879245	0.647935
	2-hydroxybutyrate o 2-hydroxyisobutyrate	NA	0.7494	1.1781	1.5619	0.9932	0.6848	1.1407	1.1176	0.846055	0.539358
	4-hydroxy-nonenal-glutathione	NA	1.0601	0.4572	0.4572	0.9531	0.6514	0.8918	0.9288	1.301	0.432935
	4-hydroxyglutamate	NA	0.666	0.6479	0.6786	0.7611	0.9494	0.884	0.8828	1.3089	0.0115312
	5-oxoproline	NA	0.8038	0.7661	0.8415	0.9065	1.1836	1.1355	0.9553	1.30035	0.0319967
	cysteine-glutathione disulfide	NA	0.9984	0.9744	1.0224	0.8909	0.8421	1.0892	1.2292	1.01447	0.88326
	cysteinylglycine	NA	0.9426	0.9487	0.9365	0.8803	0.8267	0.8294	0.9328	0.920115	0.0560997
	glutathione oxidized	NA	0.76005	0.7053	0.8148	0.8443	0.7486	0.9724	1.0596	1.19232	0.123076
	glutathione reduced	NA	0.7127	0.7366	0.6888	1.0057	0.8227	1.0292	0.8185	1.2895	0.0328157
	ophthalmate	NA	0.5921	0.5823	0.6019	0.9597	1.0299	0.9703	1.0134	1.67763	4.72813e-05
Phosphatidylcholine (PC)	1,2-dipalmitoyl-GPC (16:0/16:0)	1.2404	0.896	0.5261	0.6291	1.0181	0.6569	0.5807	1.4886	1.13753	0.681426
	1,2-dioleoyl-GPC (18:1/18:1)	0.7311	0.6551	0.766	0.8754	1.1145	1.0769	1.1258	1.113	1.46327	0.00348306
	1,2-dipalmitoleoyl-GPC (16:1/16:1)*	0.9218	0.7979	0.8836	1.0645	1.0388	0.9723	0.9899	1.0266	1.0981	0.204846
	1-palmitoleoyl-2-oleoyl-GPC (16:1/18:1)*	0.8244	0.7297	0.7901	0.9274	1.0905	1.0173	1.0027	1.0162	1.26137	0.00803095
	1-palmitoyl-2-arachidonoyl-GPC (16:0/20:4n6)	NA	0.3792	0.3629	0.3955	0.6455	0.5911	0.5898	0.6282	1.61828	4.12423e-05
	1-palmitoyl-2-dihomo-linolenoyl-GPC (16:0/20:3n3 or 6)*	NA	0.8945	0.6713	0.8596	0.933	0.814	0.8506	0.9509	1.09729	0.382809
	1-palmitoyl-2-docosahexaenoyl-GPC (16:0/22:6)	NA	0.50105	0.4561	0.546	0.6808	0.6102	0.7074	0.6917	1.34223	0.00569147
	1-palmitoyl-2-oleoyl-GPC (16:0/18:1)	0.9744	0.7991	0.705	0.7912	1.0161	0.9981	1.0574	1.0363	1.25635	0.0309067
	1-palmitoyl-2-palmitoleoyl-GPC (16:0/16:1)*	0.8997	0.7404	0.7846	0.9077	1.0897	1.0176	1.0114	1.017	1.24106	0.0108592
	1-palmitoyl-2-stearoyl-GPC (16:0/18:0)	NA	0.5246	0.5019	0.5473	0.8372	0.72	0.8182	0.8757	1.54932	0.00146422
	1-myristoyl-2-arachidonoyl-GPC (14:0/20:4)*	NA	0.646	0.6063	0.6857	0.7347	0.6091	0.6384	0.6143	1.00484	0.936223
	1-myristoyl-2-palmitoyl-GPC (14:0/16:0)	1.1359	0.8483	0.646	0.7461	0.9608	0.8992	0.9109	0.9123	1.0909	0.521981
	1-oleoyl-2-alpha-linolenoyl-GPC (18:1/18:3n3)	NA	0.9961	0.4534	0.2094	0.5821	0.5819	0.6683	0.6937	1.14202	0.76852
	1-oleoyl-2-docosahexaenoyl-GPC (18:1/22:6)*	NA	0.51605	0.4526	0.5795	0.6909	0.631	0.6744	0.7118	1.31194	0.0305934
	1-oleoyl-2-linoleoyl-GPC (18:1/18:2)*	0.9453	0.9571	0.6659	0.7355	0.9087	0.8713	0.9971	0.8224	1.0895	0.416181
	1-stearoyl-2-arachidonoyl-GPC (18:0/20:4)	NA	0.63435	0.6569	0.6118	0.843	0.7803	0.6009	0.8209	1.20009	0.101608
	1-stearoyl-2-docosahexaenoyl-GPC (18:0/22:6)	NA	0.57625	0.5165	0.636	0.8261	0.6246	0.7402	0.8482	1.31848	0.0314978
	1-stearoyl-2-oleoyl-GPC (18:0/18:1)	1.1497	NA	0.5609	0.565	0.9073	0.8422	0.8707	0.88	1.15361	0.612074
Plasmalogen	1-(1-enyl-palmitoyl)-2-arachidonoyl-GPE (P-16:0/20:4)*	NA	0.5431	0.5222	0.564	0.7296	0.7255	0.8778	0.7436	1.41618	0.00561107
	1-(1-enyl-palmitoyl)-2-oleoyl-GPC (P-16:0/18:1)*	NA	0.7368	0.6489	0.8247	0.7634	0.657	0.6722	0.8376	0.994232	0.951503
	1-(1-enyl-palmitoyl)-2-oleoyl-GPE (P-16:0/18:1)*	NA	0.5455	0.5817	0.5093	0.8486	0.5093	0.8553	0.9236	1.43758	0.0801675
	1-(1-enyl-palmitoyl)-2-palmitoleoyl-GPC (P-16:0/16:1)*	NA	0.7204	0.7056	0.7352	0.9244	0.8126	0.8865	0.8262	1.19715	0.00879491
	1-(1-enyl-palmitoyl)-2-palmitoyl-GPC (P-16:0/16:0)*	NA	0.59445	0.5436	0.6453	0.8634	0.7114	0.6877	0.883	1.32286	0.0248281
	1-(1-enyl-stearoyl)-2-arachidonoyl-GPE (P-18:0/20:4)*	NA	0.60475	0.631	0.5785	0.7044	0.6352	0.8123	0.7371	1.1943	0.0426451
Lysophospholipid	1-arachidonoyl-GPE (20:4n6)*	NA	1.0614	1.1235	0.9993	1.1433	0.9421	1.0007	1.6808	1.12279	0.499971
	1-arachidonoyl-GPI (20:4)*	NA	1.04645	1.0871	1.0058	1.0369	0.9302	0.9648	1.3318	1.01861	0.848244
Monoacylglycerol	1-arachidonylglycerol (20:4)	NA	1.0178	1.11	0.9256	1.2489	0.9037	0.6715	1.3541	1.02628	0.880473
Lysoplasmalogen	1-(1-enyl-oleoyl)-GPE (P-18:1)*	NA	0.30065	0.2428	0.3585	0.2428	0.2428	0.2905	0.4972	1.05879	0.809875
	1-(1-enyl-palmitoyl)-GPE (P-16:0)*	NA	0.2094	0.2094	0.2094	0.2094	0.2094	0.2094	0.2094	1	1
Phosphatidylethanolamine (PE)	1,2-dioleoyl-GPE (18:1/18:1)	0.9026	0.8582	0.9584	1.0006	1.2806	1.1905	1.2991	1.1697	1.328	0.000496462
	1,2-dipalmitoleoyl-GPE (16:1/16:1)*	NA	1.36565	1.3325	1.3988	1.358	1.1978	1.2321	1.184	0.910171	0.046646
	1,2-dipalmitoyl-GPE (16:0/16:0)*	0.8034	0.6646	0.8192	0.7889	1.2225	1.0017	1.2513	1.1486	1.50323	0.00195439
	1-palmitoleoyl-2-oleoyl-GPE (16:1/18:1)*	NA	1.0734	1.0765	1.0703	1.2429	1.1279	1.2221	1.1827	1.11226	0.0172904
	1-palmitoyl-2-arachidonoyl-GPE (16:0/20:4)*	1.1913	0.8663	0.8669	0.8733	0.9952	0.8824	1.0608	0.9599	1.02646	0.790529
	1-palmitoyl-2-docosahexaenoyl-GPE (16:0/22:6)*	1.1045	0.689	0.7307	0.7968	1.0746	0.9647	0.9544	0.9339	1.18266	0.207458
	1-palmitoyl-2-oleoyl-GPG (16:0/18:1)	0.9908	0.9023	0.9539	0.9612	1.2702	1.1878	1.3041	1.1659	1.29405	0.000899447
	1-palmitoyl-2-stearoyl-GPE (16:0/18:0)*	0.8979	NA	0.4992	0.534	0.8789	0.8498	1.1362	1.0974	1.53888	0.0915858
	1-oleoyl-2-arachidonoyl-GPE (18:1/20:4)*	0.859	0.7296	0.8355	0.8711	0.9882	0.9055	1.0852	0.9993	1.20727	0.0133131
	1-oleoyl-2-docosahexaenoyl-GPE (18:1/22:6)*	0.782	0.6003	0.8642	0.8988	1.1528	1.0112	1.1203	1.0471	1.3771	0.01368
	1-oleoyl-2-linoleoyl-GPE (18:1/18:2)*	0.8098	0.7708	0.9433	0.9652	1.1752	1.0297	1.1969	1.0571	1.27795	0.00930531
	1-stearoyl-2-arachidonoyl-GPE (18:0/20:4)	NA	0.7078	0.7043	0.7114	0.9119	0.8647	0.8366	0.8562	1.22536	0.0019069
	1-stearoyl-2-docosahexaenoyl-GPE (18:0/22:6)*	1.2641	0.8018	0.7681	0.7424	1.0044	0.9674	1.1277	1.0293	1.15446	0.352014
	1-stearoyl-2-oleoyl-GPE (18:0/18:1)	NA	1.1062	0.6914	0.7274	0.9867	0.9626	1.0955	1.0763	1.22409	0.288862
Phosphatidylserine (PS)	1,2-dioleoyl-GPS (18:1/18:1)	0.8494	1.0098	1.0509	1.2171	1.0433	0.9472	1.3582	1.1436	1.08846	0.46195
	1-palmitoyl-2-oleoyl-GPS (16:0/18:1)	0.9617	0.8615	0.8715	0.9897	1.1551	1.0603	1.1447	1.0614	1.20006	0.00470899
	1-stearoyl-2-arachidonoyl-GPS (18:0/20:4)	NA	0.59305	0.5661	0.62	0.7687	0.6748	0.7328	0.5639	1.15513	0.130261
	1-stearoyl-2-linoleoyl-GPS (18:0/18:2)	1.0985	0.893	0.9112	1.0049	1.3018	1.1324	0.8607	0.9655	1.09029	0.455207
	1-stearoyl-2-oleoyl-GPS (18:0/18:1)	NA	0.80475	0.7574	0.8521	0.9867	1.0298	1.0482	1.0219	1.26952	0.00628745
Phosphatidylinositol (PI)	1,2-dioleoyl-GPI (18:1/18:1)	NA	1.0245	0.9628	1.0862	1.0278	1.0184	1.056	1.185	1.04617	0.40953
	1-palmitoyl-2-arachidonoyl-GPI (16:0/20:4)*	1.0598	0.8545	0.686	0.7012	0.639	0.6214	0.7653	0.6272	0.803544	0.159264
	1-palmitoyl-2-oleoyl-GPI (16:0/18:1)*	0.9729	0.7788	0.8806	0.8933	1.0236	0.7694	0.9707	0.8719	1.0312	0.704775
	1-oleoyl-2-arachidonoyl-GPI (18:1/20:4) *	NA	0.8923	0.8467	0.7808	0.8958	0.6622	0.8959	0.8242	0.975702	0.763401
	1-stearoyl-2-arachidonoyl-GPI (18:0/20:4)	NA	0.8292	0.6242	0.6147	0.8332	0.7526	0.8803	0.7274	1.15813	0.258046
Phosphatidylglycerol (PG)	1,2-dioleoyl-GPG (18:1/18:1)	NA	0.8403	0.8168	0.8638	0.9614	0.9611	0.9697	1.034	1.16809	0.00143951
	1-palmitoyl-2-oleoyl-GPG (16:0/18:1)	NA	0.9109	0.7246	0.7524	0.8247	0.8399	1.0671	1.0334	1.18256	0.000899447
Monoacylglycerol	1-myristoylglycerol (14:0)	1.1997	NA	1.9732	1.5903	1.6733	1.4336	1.2941	2.1852	1.03704	0.851683
	1-myristoleoylglycerol (14:1)	NA	1.1987	2.1601	1.9001	1.1887	1.1132	0.9838	2.1852	0.780234	0.38015
	1-pentadecanoylglycerol (15:0)	1.2999	1.1511	1.4642	1.1074	1.4639	1.2552	1.0104	1.6305	1.06718	0.613368
	1-palmitoylglycerol (16:0)	1.1709	NA	1.8328	1.4205	1.2261	1.3291	1.0846	2.0245	0.960224	0.844852
	1-palmitoleoylglycerol (16:1)*	NA	1.3696	2.0749	1.7326	2.0998	1.6989	1.2189	2.3027	1.06048	0.753219
	1-margaroylglycerol (17:0)	0.9922	0.8631	1.7557	1.3465	1.6458	1.2434	1.2189	1.7955	1.19084	0.378635
	2-oleoylglycerol (18:1)	1.0748	NA	1.7199	1.5154	1.1067	0.935	1.1448	NA	0.73931	0.179387
	1-linoleoylglycerol (18:2)	1.4422	1.4643	1.6078	1.2279	1.331	1.0465	0.9735	1.6097	0.863902	0.294084
	2-dihomo-linoleoylglycerol (20:2)*	1.293	NA	3.0206	2.3538	2.2492	1.3549	1.8106	2.5953	0.901026	0.724461
	1-dihomo-linolenylglycerol (20:3)	NA	1.4984	1.8885	1.0618	1.3777	0.8301	1.1685	1.4004	0.805297	0.363042
	1-arachidonylglycerol (20:4)	NA	1.0178	1.11	0.9256	1.2489	0.9037	0.6715	1.3541	1.02628	0.880473
	1-docosahexaenoylglycerol (22:6)	NA	0.8965	0.9422	0.8508	1.0915	0.9364	NA	1.3271	1.24744	0.184954
	2-myristoylglycerol (14:0)	1.1715	0.8062	1.4854	1.273	1.1851	0.926	1.1301	1.7318	1.05002	0.799831
	2-palmitoylglycerol (16:0)	1.1323	0.6549	1.3391	1.2393	1.0098	0.8969	1.1321	1.7102	1.08782	0.699014
	2-palmitoleoylglycerol (16:1)*	1.0828	NA	1.7191	1.5274	1.4927	1.2049	1.0461	1.8027	0.960848	0.83212
	2-oleoylglycerol (18:1)	1.0748	NA	1.7199	1.5154	1.1067	0.935	1.1448	NA	0.73931	0.179387
	2-linoleoylglycerol (18:2)	1.4251	NA	1.0134	0.9981	1.2027	0.9805	0.7412	1.2777	0.917062	0.631765
	2-arachidonoylglycerol (20:4)	NAA	0.7719	0.6579	0.8859	1.6867	0.6796	0.6473	1.2518	1.38146	0.32692
	2-docosahexaenoylglycerol (22:6)*	1.5542	NA	0.8605	0.7871	1.4084	0.9399	0.6251	1.3168	1.00495	0.986958
	1-heptadecenoylglycerol (17:1)*	1.5762	1.4507	1.5043	1.0778	1.2091	0.9207	0.991	1.5637	0.835176	0.254881
	2-heptadecenoylglycerol (17:1)*	1.3107	1.5118	1.045	0.7722	0.9635	0.8182	0.8004	1.4167	0.861866	0.485847
	1-meadoylglycerol (20:3n9)*	1.8399	NA	3.9065	2.0313	2.2606	1.2854	1.1634	1.6812	0.616243	0.266698
	1-dihomo-linoleoylglycerol (20:2)	1.2581	NA	2.9945	2.0754	2.9316	1.8147	1.9655	2.6455	1.10904	0.711847
Sphingomyelins	sphingomyelin (d18:1/14:0, d16:1/16:0)*	1.0536	1.0432	0.9417	1.0005	0.9192	0.8302	0.865	0.9182	0.874622	0.00953837
	sphingomyelin (d18:1/17:0, d17:1/18:0, d19:1/16:0)	NA	0.4761	0.3015	0.6507	1.0571	0.6377	0.8205	0.7817	1.73125	0.0532131
	sphingomyelin (d18:1/18:1, d18:2/18:0)	NA	0.7255	0.6825	0.7685	0.8399	0.7959	0.7431	0.8241	1.10372	0.0764275
	sphingomyelin (d18:1/19:0, d19:1/18:0)*	NA	0.63735	0.6046	0.6701	0.6533	0.7085	0.787	0.7837	1.15027	0.0543975
	sphingomyelin (d18:1/20:0, d16:1/22:0)*	1.068	0.8454	0.7213	0.7469	0.87	0.7709	0.8121	0.8545	0.978087	0.833851
	sphingomyelin (d18:1/20:1, d18:2/20:0)*	NA	1.0148	0.8123	0.7555	0.8137	0.7352	0.909	0.7488	0.931242	0.549655
	sphingomyelin (d18:1/21:0, d17:1/22:0, d16:1/23:0)*	NA	0.7228	0.675	0.7706	0.963	0.5666	0.7522	0.7215	1.03877	0.762579
	sphingomyelin (d18:1/22:1, d18:2/22:0, d16:1/24:1)*	NA	0.91605	0.8409	0.9912	0.9267	0.856	0.8541	0.9701	0.984362	0.797289
	sphingomyelin (d18:1/22:2, d18:2/22:1, d16:1/24:2)*	0.941	NA	0.7936	0.8643	0.8314	0.8366	0.6029	0.6029	0.829332	0.123663
	sphingomyelin (d18:1/24:1, d18:2/24:0)*	NA	0.8341	0.82	0.8482	0.8578	0.8275	0.8733	0.8962	1.03549	0.139896
	sphingomyelin (d18:2/14:0, d18:1/14:1)*	0.794	0.793	0.8726	0.7124	0.8242	0.5185	0.974	0.9008	1.01434	0.919664
	sphingomyelin (d18:2/16:0, d18:1/16:1)*	NA	0.7975	0.767	0.828	0.8173	0.6969	0.8154	0.8279	0.989812	0.82941
	sphingomyelin (d18:2/23:0, d18:1/23:1, d17:1/24:1)*	NA	0.8033	0.7247	0.8819	0.8766	0.7695	0.8427	0.8192	1.0295	0.671902
	sphingomyelin (d18:2/23:1)*	NA	0.2185	0.2185	0.2185	0.2185	0.2185	0.2185	0.2185	1	1
	sphingomyelin (d17:1/14:0, d16:1/15:0)*	0.6339	0.9953	0.6339	0.858	0.6339	0.6339	0.6339	0.8402	0.878504	0.400734
	sphingomyelin (d17:1/16:0, d18:1/15:0, d16:1/17:0)*	NA	0.8226	0.7203	0.9249	0.8207	0.7699	0.8016	0.8787	0.994074	0.944166
	stearoyl sphingomyelin (d18:1/18:0)	NA	0.83895	0.8048	0.8731	0.8659	0.8669	0.9366	0.8685	1.05426	0.150258
	tricosanoyl sphingomyelin (d18:1/23:0)*	NA	0.6652	0.639	0.6914	0.7545	0.6651	0.7843	0.728	1.10189	0.074468
	palmitoyl sphingomyelin (d18:1/16:0)	NA	1.0988	0.8504	0.8966	0.954	0.8445	0.857	0.8508	0.924072	0.449838
	lignoceroyl sphingomyelin (d18:1/24:0)	NA	0.69245	0.6448	0.7401	0.835	0.7606	0.9157	0.7933	1.19308	0.0273503
	behenoyl sphingomyelin (d18:1/22:0)*	NA	0.71995	0.6718	0.7681	0.8161	0.7114	0.8226	0.8115	1.09785	0.129501
	sphingomyelin (d18:2/24:1, d18:1/24:2)*	NA	0.841	0.7732	0.9088	0.8769	0.7959	0.8089	0.8882	1.00175	0.976009
Medium Chain Fatty Acid	5-dodecenoate (12:1n7)	0.7319	0.5491	0.6541	0.8765	1.0409	0.9343	1.0611	1.1846	1.50124	0.00752139
Long Chain Fatty Acid	10-heptadecenoate (17:1n7)	1.2588	1.1225	1.0369	0.8937	0.8927	0.7857	0.8566	1.2492	0.877618	0.348109
	10-nonadecenoate (19:1n9)	1.0183	1.0574	1.1925	1.0402	0.9942	0.9335	0.9592	NA	0.893418	0.0548829
	eicosenoate (20:1)	NA	1.37265	1.4544	1.2909	1.3035	1.2614	1.1629	NA	0.905256	0.108823
	erucate (22:1n9)	1.2269	0.9986	1.2638	1.0486	1.0014	0.9311	0.9952	NA	0.860222	0.0889959
	myristoleate (14:1n5)	NA	1.5598	1.5953	1.5243	1.0179	1.2619	1.0923	1.4049	0.765643	0.0214912
	oleate/vaccenate (18:1)	NA	1.3973	1.473	1.3216	1.1277	1.0313	1.0302	NA	0.760801	0.00462953
	palmitoleate (16:1n7)	NA	1.74295	1.906	1.5799	1.3546	1.146	1.2634	1.6766	0.780372	0.0487271
Ceramides	ceramide (d16:1/24:1, d18:1/22:1)*	NA	1.1628	0.9563	1.3693	1.2593	1.2996	1.2276	1.7351	1.18713	0.255397
	ceramide (d18:1/14:0, d16:1/16:0)*	0.7866	0.8279	0.8146	0.9843	0.9015	0.9329	1.0867	1.002	1.14932	0.080288
	ceramide (d18:1/20:0, d16:1/22:0, d20:1/18:0)*	0.6573	0.752	0.4849	0.8329	1.0726	1.0241	1.1201	1.1014	1.58344	0.0100276
	ceramide (d18:2/24:1, d18:1/24:2)*	0.844	1.2025	0.5109	0.762	0.8028	0.8024	0.8391	0.9676	1.02787	0.884756
	N-behenoyl-sphingadienine (d18:2/22:0)*	0.9772	NA	0.5472	0.6441	0.7965	1.0035	0.735	0.9773	1.21477	0.365177
	N-palmitoyl-heptadecasphingosine (d17:1/16:0)*	NA	0.78205	0.742	0.8221	0.6206	0.5905	1.3819	0.7011	1.05303	0.840004
	N-palmitoyl-sphingadienine (d18:2/16:0)*	NA	0.71435	0.7458	0.6829	0.8286	0.8344	0.9613	0.8562	1.21807	0.00897429
	N-palmitoyl-sphingosine (d18:1/16:0)	NA	0.65575	0.6547	0.6568	0.8644	0.819	1.109	0.9222	1.41616	0.0233801
	N-stearoyl-sphingadienine (d18:2/18:0)*	NA	0.3384	0.3384	0.3384	0.3384	0.3384	0.8223	0.3384	1.35749	0.391002
	N-stearoyl-sphingosine (d18:1/18:0)*	0.6949	0.8327	0.5365	0.6873	0.995	0.9835	1.0985	1.0716	1.50781	0.00538964
Polyunsaturated Fatty Acid (n3 and n6)	arachidonate (20:4n6)	NA	1.03085	1.2385	0.8232	1.042	0.6605	0.8473	1.1371	0.894141	0.528595
	adrenate (22:4n6)	NA	0.2005	0.2005	0.2005	0.2005	0.2005	0.2005	0.4794	1.34776	0.391002
	dihomo-linoleate (20:2n6)	0.9081	NA	1.682	1.4982	1.2576	1.1546	1.142	NA	0.869359	0.52659
	dihomo-linolenate (20:3n3 or n6)	NA	0.8874	1.0139	0.7609	0.8427	0.5282	0.6856	1.1243	0.896101	0.559514
	docosadienoate (22:2n6)	0.8187	1.2756	1.2467	1.3474	1.3447	1.4244	0.9882	NA	1.06854	0.675451
	docosahexaenoate (DHA; 22:6n3)	NA	0.97315	1.0501	0.8962	0.8829	0.6997	0.771	1.3589	0.953733	0.787696
	docosapentaenoate (n3 DPA; 22:5n3)	NA	0.7079	0.7731	0.6427	0.5865	0.5503	0.6026	0.9756	0.958822	0.798402
	docosapentaenoate (n6 DPA; 22:5n6)	NA	1.618	1.1898	0.9823	1.0177	0.7936	0.6655	1.5402	0.7949	0.38055
	docosatrienoate (22:3n3)	NA	0.7976	0.9546	0.6406	0.2156	0.3944	0.4166	1.2603	0.716807	0.420773
	docosatrienoate (22:3n6)*	NA	1.6128	1.0292	0.9383	0.5897	0.6318	0.5529	1.3721	0.659128	0.221452
	eicosapentaenoate (EPA; 20:5n3)	NA	0.6855	0.852	0.519	0.6735	0.4813	0.6309	0.6796	0.899088	0.563975
	linoleate (18:2n6)	1.0668	0.9763	1.5599	1.2271	1.0647	0.9468	0.9746	1.4948	0.927703	0.646407
	linolenate [alpha or gamma; (18:3n3 or 6)]	1.3697	1.1308	1.1972	0.951	0.8634	0.6841	0.8924	1.0251	0.74537	0.0392774
	mead acid (20:3n9)	1.2919	0.9881	1.8185	1.3418	1.1678	1.0195	0.9459	NA	0.767899	0.164255
	nisinate (24:6n3)	NA	1.1854	1.3778	0.993	0.7743	0.7215	0.6491	NA	0.603144	0.0406859
Fatty Acid Metabolism (also BCAA Metabolism)	butyrylcarnitine (C4)	NA	0.1656	0.2643	0.0669	0.0669	0.0669	0.1228	0.0669	0.488376	0.272708
	propionylcarnitine (C3)	1.3398	NA	0.7343	0.7413	1.1021	0.901	1.3425	0.9985	1.15723	0.555266
Fatty Acid Metabolism(Acyl Carnitine)	3-hydroxybutyrylcarnitine (1)	NA	1.2476	0.5971	0.615	0.5696	0.2009	1.1157	0.8746	0.84181	0.676176
	3-hydroxybutyrylcarnitine (2)	NA	0.8969	0.9199	0.8739	0.8463	0.5381	0.829	0.7286	0.820047	0.104878
	eicosenoylcarnitine (C20:1)*	NA	0.4544	0.4544	0.4544	0.4544	0.4544	0.4544	0.4544	1	0.292893
	hexanoylcarnitine (C6)	NA	0.4455	0.1777	0.1777	0.1777	0.1777	0.1777	0.1777	0.665626	0.42265
	myristoleoylcarnitine (C14:1)*	NA	0.3324	0.2735	0.2735	0.2735	0.2735	0.2735	0.2735	0.933023	0.42265
	myristoylcarnitine (C14)	NA	0.48315	0.6595	0.3068	0.963	0.5808	1.0926	0.634	1.69223	0.0923336
	octanoylcarnitine (C8)	NA	0.7481	0.3063	0.2972	0.2972	0.2972	0.2972	0.2972	0.659663	0.411118
	oleoylcarnitine (C18:1)	NA	0.5949	0.8298	0.36	1.1397	0.538	1.1105	0.6365	1.43919	0.263164
	palmitoleoylcarnitine (C16:1)*	NA	0.6311	0.8471	0.4151	0.9693	0.5156	1.0307	0.6808	1.2662	0.381037
	palmitoylcarnitine (C16)	NA	0.56995	0.7428	0.3971	1.0914	0.5087	1.0352	0.6023	1.42012	0.239755
	pentadecanoylcarnitine (C15)*	NA	0.4691	0.1706	0.1706	0.1834	0.1706	0.1706	0.1706	0.643465	0.435247
	stearoylcarnitine (C18)	NA	0.5457	0.6429	0.4485	0.7649	0.6384	0.9224	0.6287	1.35349	0.0816184
	acetylcarnitine (C2)	NA	0.59345	0.6277	0.5592	0.8975	0.6121	0.8753	0.7145	1.30567	0.0710925
	margaroylcarnitine (C17)*	NA	0.5551	0.7411	0.3691	0.8965	0.5629	0.6913	0.5163	1.20113	0.458797
Phospholipid Metabolism	phosphoethanolamine	0.7013	NA	0.4109	0.3807	0.9841	0.7857	1.1073	0.9745	1.93496	0.0226612
	trimethylamine N-oxide	NA	0.3566	0.4355	0.3566	0.3566	0.3566	0.6958	0.3566	1.15278	0.550165
	glycerophosphoinositol*	0.8471	0.8859	1.0003	0.9333	1.1928	1.1072	1.0882	0.9837	1.19236	0.0190083
	glycerophosphorylcholine (GPC)	NA	1.0099	1.0036	1.0162	0.954	0.9011	1.0772	0.925	0.954872	0.32899
	glycerophosphoserine*	1.0334	0.723	0.962	0.7369	0.9756	0.9537	1.1426	0.6426	1.07502	0.638773
	glycerophosphoethanolamine	NA	1.1812	1.0649	1.2975	0.9242	1.2655	1.0439	1.3507	0.970263	0.780028
	cytidine-5'-diphosphoethanolamine	NA	0.5139	1.0831	0.9204	1.792	1.6725	1.473	1.5088	1.92052	0.0290447
	cytidine 5'-diphosphocholine	0.8853	1.1825	1.1085	0.8556	1.0459	0.7967	0.7541	0.7897	0.839902	0.177678
	choline	1.5634	1.1118	1.5132	1.1485	1.6551	1.127	1.4291	1.0847	0.992318	0.956268
	choline phosphate	NA	0.0619	0.0607	0.0631	0.1794	0.1638	0.2062	0.1452	2.80533	0.00318357
Fatty Acid, Dicarboxylate	2-hydroxyadipate	NA	1.5464	1.4399	1.6529	1.2261	1.4341	1.2292	1.4671	0.865963	0.0690894
	2-hydroxyglutarate	NA	0.9339	1.3865	1.2924	1.0011	1.0106	1.0897	0.9807	0.847424	0.313242
	3-hydroxyadipate*	NA	1.26105	1.0326	1.4895	1.279	1.3972	NA	1.1868	1.02111	0.867018
	glutarate (C5-DC)	0.7575	NA	1.5851	1.439	0.9928	1.0899	1.0459	1.1958	0.857653	0.556167
	maleate	1.1601	1.2743	0.798	1.0478	0.8084	1.0455	1.0395	1.136	0.941405	0.63197
Carnitine Metabolism	deoxycarnitine	NA	0.69465	0.7028	0.6865	0.944	0.9021	0.9853	1.0274	1.38876	0.00171435
	carnitine	NA	0.55645	0.4984	0.6145	0.6844	0.8148	0.8327	0.8591	1.43364	0.0053676
Fatty Acid, Monohydroxy	2-hydroxynervonate*	0.6336	NA	1.0791	1.0287	1.435	1.1844	0.9574	1.3457	1.34671	0.145307
Endocannabinoid	N-oleoyltaurine	NA	0.3586	0.3713	0.3459	0.7156	0.8861	0.8257	1.2554	2.56748	0.0169588
	N-stearoyltaurine	NA	0.1401	0.1401	0.1401	0.319	0.3754	0.1401	0.6687	2.68237	0.121007
	oleoyl ethanolamide	1.037	0.8338	0.819	0.7882	0.8948	0.8566	1.0255	1.3082	1.17455	0.254386
Inositol Metabolism	myo-inositol	NA	1.19015	1.2463	1.134	1.4206	1.3714	1.2895	1.2789	1.12599	0.0249049
Diacylglycerol	diacylglycerol (12:0/18:1, 14:0/16:1, 16:0/14:1) [2]*	1.1103	NA	1.9117	1.5907	1.0723	1.071	1.0582	1.389	0.74639	0.229959
	palmitoleoyl-linoleoyl-glycerol (16:1/18:2) [1]*	1.1134	NA	1.9106	1.8543	0.7575	0.9784	1.3096	1.6142	0.716392	0.221626
Glycerolipid Metabolism	glycerol	1.5005	0.7864	1.4445	0.9903	1.8736	0.9939	1.4308	1.0939	1.142	0.549353
	glycerol 3-phosphate	1.1877	0.9191	0.8518	0.8764	0.9802	0.9806	0.9838	0.9124	1.00574	0.948816
	glycerophosphoglycerol	1.3078	0.6932	1.2473	0.9453	0.989	0.9771	1.1877	0.9896	0.988029	0.938109
Sphingolipid Synthesis	phytosphingosine	0.8364	NA	0.502	0.502	0.502	0.502	0.502	0.502	0.8183	0.42265
	sphingadienine	NA	0.64485	0.624	0.6657	0.8859	0.7055	0.953	0.8548	1.31783	0.0264744
	sphinganine	1.0008	0.7493	0.76	0.739	0.8085	0.7906	0.8875	0.7876	1.00773	0.930308
Ceramides	N-palmitoyl-sphinganine (d18:0/16:0)	NA	0.6273	0.9657	1.0349	1.1848	1	1.5039	1.0839	1.3621	0.12324
Lactosylceramides (LCER)	lactosyl-N-palmitoyl-sphingosine (d18:1/16:0)	NA	2.4747	2.4228	2.5266	1.4619	1.1123	1.4124	1.2985	0.533913	0.000203977
Hexosylceramides (HCER)	glycosyl-N-palmitoyl-sphingosine (d18:1/16:0)	0.8532	NA	1.6748	1.7818	1.3434	1.3668	1.3656	1.3863	0.950526	0.831164
Sphingomyelins	behenoyl dihydrosphingomyelin (d18:0/22:0)*	NA	0.76515	0.74	0.7903	0.8171	0.623	0.681	0.7844	0.949324	0.463363
	myristoyl dihydrosphingomyelin (d18:0/14:0)*	NA	1.3483	1.2794	1.4172	0.963	0.928	0.9055	1	0.703942	0.00270321
	sphingomyelin (d18:0/18:0, d19:0/17:0)*	NA	1.06315	0.9454	1.1809	1.077	0.9577	1.0204	1.1804	0.995979	0.961418
	sphingomyelin (d18:0/20:0, d16:0/22:0)*	1.0513	NA	0.7194	0.7736	0.7784	0.8195	0.9116	0.9406	1.01701	0.904979
	palmitoyl dihydrosphingomyelin (d18:0/16:0)*	NA	1.11435	1.0878	1.1409	0.985	0.9455	0.8999	1.0378	0.867815	0.00912341
Primary Bile Acid Metabolism	taurochenodeoxycholate	NA	0.4353	0.4353	0.4353	0.4353	0.4353	0.4353	0.5611	1.07225	0.391002
Sphingosines	sphingosine	NA	1.1017	0.7872	0.6699	0.9664	0.7235	0.9348	0.7397	0.986126	0.939622
	heptadecasphingosine (d17:1)	NA	0.5955	0.5698	0.6212	0.7615	0.6768	0.8957	0.8582	1.34013	0.0217194
	hexadecasphingosine (d16:1)*	1	0.6199	1.0677	0.682	0.253	0.3261	0.2051	0.5561	0.397762	0.0121779
Sterol	cholesterol	1.0019	1.1529	0.7527	0.8657	0.8856	0.9177	0.8096	0.9693	0.94938	0.63447
	4-cholesten-3-one	0.4833	0.7195	0.9242	0.7884	1.0071	0.4833	0.4833	0.9374	0.998525	0.99517
Mevalonate Metabolism	3-hydroxy-3-methylglutarate	1.5872	NA	1.303	1.2563	0.9569	0.9258	0.9683	0.9976	0.696117	0.0529359
Glycine, Serine and Threonine Metabolism	betaine	NA	0.7366	0.706	0.7672	0.8939	0.8361	0.8789	0.851	1.17428	0.00430026
	dimethylglycine	NA	0.7679	0.6881	0.8477	0.9044	0.5015	0.682	0.8125	0.944264	0.685284
	glycine	0.6878	0.6071	0.8755	0.9252	1.0577	0.9875	1.1584	1.1091	1.39317	0.0193794
	N-acetylserine	1.0633	0.9054	0.9298	0.9655	1.0879	1.0684	1.2511	1.1147	1.17032	0.0233577
	N-acetylthreonine	0.7918	0.6748	1.014	1.0968	1.1803	1.1881	1.3345	1.3618	1.41575	0.023252
	serine	1.0391	0.7667	0.981	0.9801	1.0984	1.0621	1.1226	1.1479	1.1763	0.0645254
	threonine	1.3204	NA	0.862	0.8208	1.0761	1.1002	1.1509	1.1122	1.10867	0.567476
Alanine and Aspartate Metabolism	alanine	0.9941	0.7276	0.8113	0.8698	1.1338	1.0579	1.0963	1.0628	1.27859	0.0194068
	asparagine	1.2556	0.8366	0.9419	0.8756	1.1209	1.1261	1.1938	1.043	1.14684	0.232005
	aspartate	0.956	0.9421	0.7267	0.8062	1.2178	1.3565	1.6998	1.4701	1.67421	0.00514313
	N-acetylalanine	1.2681	0.869	1.1142	1.0207	0.8898	1.0305	0.9932	1.0104	0.918516	0.38754
	N-acetylasparagine	NA	0.7639	0.7342	0.7936	1.2558	1.2537	1.5231	1.2785	1.73815	0.00221245
	N-acetylaspartate (NAA)	0.5494	NA	0.8341	0.8538	1.018	1.0813	1.1449	0.982	1.41673	0.0727988
Glutamate Metabolism	4-hydroxyglutamate	NA	0.66325	0.6479	0.6786	0.7611	0.9494	0.884	0.8828	1.3107	0.0115312
	alpha-ketoglutaramate*	NA	1.0948	0.9862	1.0003	0.6904	0.9719	0.8765	0.8217	0.817958	0.0441962
	beta-citrylglutamate	NA	1.39245	1.522	1.2629	1.5512	1.2855	1.2909	1.4652	1.00413	0.956474
	glutamate	0.9521	0.8234	0.9987	1	1.1309	1.0875	1.1888	1.1245	1.2007	0.0123842
	glutamate, gamma-methyl ester	1.0577	1.2826	0.9949	0.922	0.8822	1.0051	0.9168	0.9265	0.876304	0.190573
	glutamine	1.5149	0.5088	0.8247	0.7377	1.0805	1.3594	1.2296	1.0481	1.31552	0.288862
	N-acetyl-aspartyl-glutamate (NAAG)	NA	1.01055	0.9626	1.0585	1.0093	1.1269	1.1645	1.1377	1.09802	0.0747559
	N-acetylglutamate	0.8327	1.0011	0.8455	0.942	0.9323	1.0057	0.9533	0.9562	1.06246	0.261586
	N-acetylglutamine	NA	0.80515	0.781	0.8293	1.3283	1.2864	1.44	1.4055	1.6954	0.000147698
	N-methyl-GABA	1.005	NA	0.5971	0.6253	1.0508	0.979	0.9895	0.9773	1.34572	0.188331
	pyroglutamine*	NA	1.0481	0.9893	1.1069	1.0717	1.0107	1.2855	1.184	1.08575	0.259514
	S-1-pyrroline-5-carboxylate	1.0828	0.8027	0.9959	1.2394	1.0486	1.7869	1.3098	1.3735	1.33925	0.107958
	carboxyethyl-GABA	1.0428	0.9371	1.4204	0.6061	0.6711	0.7027	1	1.5195	0.97177	0.916521
Histidine Metabolism	1-methyl-4-imidazoleacetate	NA	0.6276	0.6827	0.5725	0.4156	0.8757	0.603	0.7056	1.03565	0.837179
	4-imidazoleacetate	NA	0.78355	0.807	0.7601	0.6799	0.9803	0.5734	0.7064	0.938038	0.616872
	carnosine	NA	0.20905	0.1735	0.2446	0.6177	0.4368	0.1166	0.2504	1.69995	0.274519
	formiminoglutamate	NA	1.262	1.1609	1.3631	1.1982	1.1152	1.0154	1.1402	0.885301	0.113564
	histidine	1.2516	0.7715	1.0159	1.0304	1.0932	1.1293	0.9716	0.8621	0.996756	0.978299
	imidazole lactate	1.0758	0.8802	1.1648	1.3098	0.973	1.3265	1.144	1.2251	1.05372	0.629388
	imidazole propionate	NA	0.87035	0.7627	0.978	1.5138	0.5085	0.9449	1	1.13954	0.606106
	N-acetylhistidine	NA	0.9753	1	0.9506	1.1832	1.2624	1.2372	1.2969	1.27645	0.000302376
Leucine, Isoleucine and Valine Metabolism	1-carboxyethylisoleucine	NA	0.4168	0.4168	0.4168	0.4168	0.8405	0.4168	0.4168	1.25414	0.391002
	1-carboxyethylleucine	NA	0.5536	0.5536	0.5536	0.5536	0.9624	0.5536	0.5536	1.18461	0.391002
	1-carboxyethylvaline	NA	1.006	0.417	0.5507	0.727	0.417	0.417	0.417	0.751634	0.467121
	2-methylbutyrylcarnitine (C5)	NA	1.0539	1.0883	1.0195	1.2002	1.1515	1.265	1.2153	1.14622	0.00403802
	3-methyl-2-oxobutyrate	NA	0.94615	1	0.8923	0.5456	0.5927	0.3485	0.7296	0.585637	0.0106807
	3-methyl-2-oxovalerate	NA	1.0935	0.783	0.7501	0.8021	0.9078	0.4154	0.4154	0.725472	0.214128
	4-methyl-2-oxopentanoate	NA	1.2242	1	0.9048	NA	0.7976	0.555	0.6454	0.638543	0.0370491
	beta-hydroxyisovalerate	0.9335	0.5497	1.0324	0.9926	1.0341	1.3149	0.9259	0.9264	1.19757	0.275784
	ethylmalonate	1.2972	NA	1.2979	1.2505	1.1177	1.2613	1.2322	1.3166	0.961059	0.330392
	isobutyrylcarnitine (C4)	0.3494	0.7292	1.5252	0.3494	1.3145	0.3494	2.0877	1.4547	1.76294	0.263567
	isoleucine	1.3989	0.8817	0.9246	0.8656	0.9047	1.0068	0.8128	0.8714	0.883291	0.430591
	isovalerylcarnitine (C5)	NA	1.2612	1.3703	1.1521	1.3151	0.9126	1.7588	1.1735	1.02284	0.886183
	leucine	1.2749	0.8736	1.0586	0.9581	1.0547	0.9655	0.8505	0.9915	0.927254	0.472833
	methylsuccinate	0.9936	NA	1.2149	1.1792	1.0684	1.1753	1.1965	1.2325	1.03449	0.647849
	tiglylcarnitine (C5:1-DC)	NA	1.3663	1.1568	1.5758	1.4887	NA	1.085	1.0317	0.879602	0.432971
	valine	1.4228	0.9592	1.0978	0.9798	1.0272	0.9914	0.8403	0.9604	0.856422	0.237381
Tryptophan Metabolism	C-glycosyltryptophan	0.7013	0.913	1.1544	1.0758	1.2055	1.2149	1.1634	1.4147	1.30017	0.0565372
	kynurenine	NA	0.45555	0.5715	0.3396	0.3396	0.5614	0.6629	0.8838	1.34327	0.291349
	tryptophan	1.3291	0.9464	1	0.9011	1.0386	1.0223	0.9082	0.9643	0.941771	0.58538
Tyrosine Metabolism	tyrosine	1.3476	0.9172	1.054	0.9465	1.0241	1.0749	0.9847	1.0132	0.960519	0.700426
	phenol sulfate	1.1293	0.6679	1.0177	1.1471	1.1492	1.2218	1.1933	1.2375	1.21196	0.154756
	O-methyltyrosine	1.0356	0.9008	1.0669	1.0102	0.8481	0.9898	0.8346	1.0465	0.926623	0.296562
	N-acetyltyrosine	0.7045	0.9616	0.7192	0.7046	0.917	0.9846	0.8416	1.2124	1.28017	0.0804161
	dopamine 3-O-sulfate	0.5732	0.5022	0.8706	0.8941	1.3154	1.3325	1.0762	1.2055	1.73571	0.00703978
	3-(4-hydroxyphenyl)lactate	1.0071	0.9112	1.0476	1.0786	0.8259	0.8444	0.9589	0.9101	0.87509	0.0387457
Lysine Metabolism	2-aminoadipate	NA		1.0317	0.959	1.2509	1.2883	1.4135	1.2926	1.31745	0.00906463
	5-aminovalerate	NA	1.0678	0.773	0.6441	NA	0.6441	0.6441	0.7528	0.821361	0.359999
	6-oxopiperidine-2-carboxylate	NA	0.90425	0.8809	0.9276	1.1881	1.2745	1.4659	1.3331	1.45469	0.0045564
	lysine	1.1874	0.9167	1.2137	1.0873	1.0961	0.9427	0.9022	0.9701	0.887857	0.17957
	N,N,N-trimethyl-5-aminovalerate	1.1885	NA	0.6785	0.6116	0.8383	0.7422	0.9494	0.9471	1.05211	0.838353
	N6,N6,N6-trimethyllysine	NA	0.9282	0.8944	0.962	0.8651	0.814	0.6048	0.8268	0.837831	0.0779465
	N6-acetyllysine	1.1271	1.4262	1.4291	1.2244	1.009	0.6922	1.0168	0.6512	0.647077	0.0114567
	pipecolate	0.6911	0.7834	1.1112	1.15	1.0685	1.1204	1.5782	1.0909	1.30043	0.145471
	saccharopine	NA	1.0323	1.2375	0.8271	1.1488	1.4796	1.0093	1.0973	1.14671	0.383563
Urea cycle; Arginine and Proline Metabolism	2-oxoarginine*	NA	1.0486	1	1.0972	1.1561	1.1923	1.2335	1.2255	1.14615	0.0132211
	arginine	1.1712	0.7686	1.1285	1.0091	1.1225	1.0705	0.9639	0.9797	1.01452	0.887118
	argininosuccinate	1.773	1.158	1.779	1.6118	1.3243	0.9697	0.836	1.0951	0.668338	0.0298335
	dimethylarginine (SDMA + ADMA)	1.3411	1.0652	1.4334	1.3629	1.2487	0.9202	0.9591	1.0711	0.807116	0.0620488
	homoarginine	NA	0.8814	0.9771	0.7857	NA	0.7506	0.442	0.844	0.770214	0.232841
	N-acetylarginine	NA	0.7043	0.7104	0.6982	1.0574	0.9499	1.0889	1.1149	1.49478	0.00224157
	N-delta-acetylornithine	NA	0.6936	0.7274	0.6598	0.9874	1.0126	0.532	0.7734	1.19139	0.322348
	N-monomethylarginine	1.3293	1.0914	1.5393	1.2421	1.297	1.0074	0.9471	1.0818	0.832991	0.124136
	ornithine	NA	1.5763	0.9962	0.9583	1.0978	1.0381	0.8709	0.8427	0.817697	0.397945
	proline	0.9992	0.6629	0.88	0.8775	1.2387	1.2509	1.4464	1.253	1.51743	0.00286866
	trans-4-hydroxyproline	NA	0.56845	0.5826	0.5543	0.7702	0.9954	0.889	0.7609	1.50211	0.0132046
	citrulline	NA	0.5207	0.4714	0.57	0.7231	0.6991	0.7474	0.6246	1.34156	0.00717546
Methionine, Cysteine, SAM and Taurine Metabolism	3-sulfo-L-alanine	0.5338	NA	1.1165	0.886	0.9044	0.9988	1.0667	0.9854	1.16961	0.488145
	cystathionine	NA	3.36605	3.5274	3.2047	3.0338	2.862	3.308	3.3883	0.935228	0.214673
	cysteine	NA	0.691	0.9068	1.0213	0.9804	0.9996	0.9551	1.0359	1.13713	0.341298
	cysteine s-sulfate	NA	1.6986	1.7094	1.6878	1.4275	1.1056	0.6996	1.2748	0.663414	0.0355094
	cysteine sulfinic acid	0.5115	0.6458	0.8749	0.8449	0.926	0.9962	1.2306	1.0038	1.44472	0.027621
	hypotaurine	NA	1.0281	0.745	0.8038	1.0199	1.0153	1.1688	1.0733	1.2449	0.119735
	methionine	1.1464	0.8533	1.0125	0.9824	1.0366	0.9845	1.0274	0.9305	0.996095	0.954964
	methionine sulfone	NA	0.1858	0.1858	0.1858	0.1858	0.1858	0.1858	0.1858	1	1
	methionine sulfoxide	NA	0.9347	0.9433	0.9261	0.7523	0.6611	0.7409	0.876	0.810501	0.0273645
	N-acetylmethionine	1.216	1.0255	1.1014	1.1246	1.0319	1.0063	0.9383	1.0758	0.907062	0.0809759
	N-acetylmethionine sulfoxide	0.8096	0.8666	0.8423	1.3425	1.0564	0.9396	0.537	1.7878	1.11909	0.710346
	N-acetyltaurine	NA	1.2857	0.9857	0.6598	NA	0.9713	1.0778	1.0757	1.06605	0.757342
	N-formylmethionine	0.8442	0.7427	0.9806	1.063	1.0732	1.3218	1.1873	1.2988	1.34447	0.0150583
	S-adenosylhomocysteine (SAH)	1.4155	1.0559	0.9856	1.0248	0.9905	0.9691	0.9396	1.0036	0.870811	0.241643
	S-adenosylmethionine (SAM)	0.9923	0.7733	0.99	1.0853	1.3323	1.1833	1.2313	1.4051	1.34135	0.00866044
	S-methylcysteine	0.9402	1.1427	1.0795	1.2595	0.5288	1.2148	0.821	0.8878	0.78075	0.18999
	taurine	1.0319	0.9933	0.6939	0.722	0.9821	0.9329	1.1387	1.006	1.17977	0.186206
	N-acetylcysteine	1.0716	1.036	1.1073	1.2938	0.859	0.8448	0.8774	1.3273	0.86688	0.308457
Creatine Metabolism	creatine	0.925	0.7998	0.7972	0.8753	0.9887	0.9799	1.0973	1.0434	1.20958	0.00523779
	creatine phosphate	NA	0.2217	0.2217	0.2217	0.4388	0.7723	1.3206	0.8652	3.83051	0.0409111
	creatinine	NA	0.998	0.5763	0.6651	0.6585	0.7726	0.7451	0.7385	0.976165	0.903407
Guanidino and Acetamido Metabolism	4-guanidinobutanoate	0.8571	0.8597	0.7977	0.8279	1.1342	1.1507	1.3158	1.2445	1.44962	0.00156517
Polyamine Metabolism	5-methylthioadenosine (MTA)	1.1042	0.8156	1.0976	0.9686	1.3518	1.2235	1.2792	1.186	1.26455	0.0215314
	diacetylspermidine*	0.9614	NA	0.6697	0.696	0.969	0.7539	0.9071	1.1052	1.20382	0.249741
	N('1)-acetylspermidine	1.231	NA	0.6369	0.6691	0.9895	0.9441	1.0964	0.9801	1.18548	0.502819
	N(1)-acetylspermine	NA	0.6489	0.9657	0.3321	0.8774	0.6121	0.5757	1.2455	1.2755	0.493463
	N-acetyl-isoputreanine*	1.125	1.2615	0.874	0.9622	1.0282	0.9488	1.0626	1.0514	0.968811	0.734853
	N-acetylputrescine	0.8294	NA	0.4888	0.5555	1.2444	1.2238	1.4022	1.5369	2.16442	0.00524954
	N1,N12-diacetylspermine	1.2601	NA	0.8222	0.8386	0.9641	0.9276	0.9666	0.9914	0.988488	0.944908
	putrescine	0.774	0.5666	0.5002	0.5338	2.0563	1.4124	1.9973	1.9415	3.11947	0.00142691
	spermidine	NA	0.9595	1.2685	0.5931	1.8849	0.6548	1.0174	NA	1.26089	0.594308
	spermine	NA	0.7491	0.9098	0.2148	0.8344	0.2148	0.2148	NA	0.674601	0.52822
Gamma-glutamyl Amino Acid	gamma-glutamylalanine	0.435	0.4731	0.4438	0.893	0.7239	1.3243	0.7922	1.4283	1.90151	0.0624889
	gamma-glutamylcysteine	0.797	0.9759	0.7739	0.8799	0.7216	0.9539	0.7376	0.9091	0.969504	0.739394
	gamma-glutamylglutamate	0.4882	0.7969	0.8324	0.9552	0.9743	0.9941	1.1745	0.9542	1.33339	0.076338
	gamma-glutamylglutamine	0.7956	0.5087	0.4419	0.6732	0.7381	1.3674	0.9455	1.0344	1.6886	0.0424138
	gamma-glutamylglycine	NA	0.8826	0.6228	1.1424	0.6785	0.8639	0.6439	1.6419	1.08435	0.799613
	gamma-glutamylisoleucine*	1.0303	1.036	0.6742	0.962	0.6287	0.9289	0.8822	1.1062	0.957731	0.774559
	gamma-glutamylleucine	1.1233	0.9272	0.7056	0.8138	0.6781	0.7647	0.6047	0.851	0.811928	0.168557
	gamma-glutamylmethionine	0.7954	0.8979	0.6277	1.186	0.6771	1.0554	0.5316	0.9021	0.902823	0.624352
	gamma-glutamylphenylalanine	0.6049	1.1804	0.6194	0.9165	0.481	0.6741	0.481	1.0147	0.798145	0.40261
	gamma-glutamylthreonine	NA	0.61065	0.565	0.6563	0.8238	0.8387	0.8295	0.7727	1.33657	0.00503544
	gamma-glutamyltyrosine	0.4441	1.12	0.7638	0.6254	0.5833	0.8669	0.4441	0.7862	0.907629	0.7079
	gamma-glutamylvaline	NA	1.3199	1.047	0.6825	0.6527	0.6761	0.673	0.8157	0.692964	0.2299
Dipeptide	alanylleucine	0.6391	0.9278	1.3244	1.0711	1	0.9321	0.5961	1.2813	0.961412	0.855208
	glycylleucine	1.1719	0.8425	0.8341	1.0514	0.7921	0.8428	0.8171	0.894	0.857971	0.192638
	glycylvaline	1.0156	0.9139	1.1918	0.7737	1.0127	0.8478	0.5762	0.8501	0.843851	0.273687
	isoleucylglycine	NA	1.04655	1.1163	0.9768	0.823	1.1139	0.7515	0.9078	0.859061	0.164003
	leucylalanine	NA	0.77595	0.7182	0.8337	0.7454	0.6656	0.5358	1.037	0.961338	0.802379
	leucylglutamine*	0.6623	NA	1.0037	0.943	1.1792	0.6891	0.5838	1.023	0.998975	0.996127
	leucylglycine	0.6284	NA	0.9555	1.009	0.8521	0.9449	0.982	0.8785	1.05794	0.71862
	phenylalanylalanine	0.5449	NA	1.3683	1.0045	1.1832	1.0252	0.7497	0.8271	0.972992	0.925915
	phenylalanylglycine	0.7461	NA	0.9133	1.0527	0.9333	1.0334	0.8082	1.1719	1.09144	0.516426
	threonylphenylalanine	0.6746	NA	1	0.9592	0.6387	1.2823	0.8541	0.9119	1.04991	0.80518
	tyrosylglycine	NA	0.7373	0.9825	0.9346	0.8975	1.0014	0.7976	1.0457	1.05736	0.615532
	valylglutamine	0.7004	NA	1.0324	1.1074	0.8409	0.9841	0.8944	1.1015	1.00897	0.954827
	valylglycine	NA	1.21465	1.4293	1	1.3597	0.938	0.6909	0.7649	0.772548	0.214383
Acetylated Peptides	phenylacetylglycine	NA	1.1331	0.611	0.5119	0.7365	0.8437	0.6481	0.6853	0.968617	0.914853
Pentose Metabolism	ribitol	1.1074	0.5613	0.952	1.0657	0.7834	0.9476	0.8897	0.9723	0.974664	0.868323
	ribonate	0.7345	NA	1.3944	1.5145	1.0888	1.326	1.0523	1.3961	1.0011	0.996247
	ribose	1.6875	1.2528	1.887	1.1035	1.1608	0.9112	0.9343	0.9514	0.667313	0.0689231
	ribulonate/xylulonate*	NA	0.2695	0.2695	0.2695	NA	0.2695	0.2695	0.2695	1	1
	arabitol/xylitol	1.2218	0.9043	0.8239	0.6818	0.6446	0.7207	0.6205	0.6746	0.732529	0.12195
	arabonate/xylonate	0.727	NA	2.0668	0.7582	0.7547	1.5878	0.8996	1.5621	1.0144	0.974567
Pentose Phosphate Pathway	sedoheptulose-7-phosphate	0.7368	0.6289	0.7892	0.8907	0.9534	0.9343	1.0791	1.0429	1.31656	0.0131456
	6-phosphogluconate	NA	0.7207	1.4277	1.0244	NA	0.9557	0.7957	1.0063	0.869169	0.575352
Nucleotide Sugar	cytidine 5'-monophospho-N-acetylneuraminic acid	1.4936	0.7381	1.1878	1.076	1.1067	1.111	0.956	1.1095	0.952775	0.760579
	guanosine 5'-diphospho-fucose	0.8314	1.1923	0.8226	0.8688	0.8143	0.8007	0.947	0.8787	0.926139	0.509869
	UDP-galactose	0.6173	0.555	0.6571	0.8194	1.3031	1.345	1.5326	1.3999	2.10684	7.42306e-05
	UDP-glucose	0.6514	0.6488	0.5667	0.7847	1.2731	1.2613	1.4086	1.4191	2.02221	3.55142e-05
	UDP-glucuronate	1.1257	0.782	0.8379	0.8011	0.8262	0.8904	1.0038	0.8621	1.01009	0.924581
	UDP-N-acetylglucosamine/galactosamine	NA	0.9658	0.8852	1.0464	1.1194	1.2631	1.1257	1.2817	1.23988	0.0169274
Aminosugar Metabolism	erythronate*	1.2647	0.5667	1.1344	1.2705	0.8845	1.0439	0.982	1.1044	0.947714	0.767961
	glucuronate	0.8611	0.702	1.0075	0.9742	1.1201	0.8012	1.0989	0.8827	1.10102	0.426924
	N-acetyl-glucosamine 1-phosphate	NA	0.5324	0.8958	0.8993	0.4857	0.4857	0.4857	0.7554	0.712943	0.201762
	N-acetylglucosamine 6-phosphate	NA	1.2054	1.1061	1.3047	1.1072	0.8612	0.7458	1.125	0.79625	0.0785488
	N-acetylglucosamine/N-acetylgalactosamine	NA	1.49195	1.6804	1.3035	1.5947	1.1223	1.3477	1.655	0.958427	0.720304
	N-acetylglucosaminylasparagine	NA	1.16725	1.1238	1.2107	1.2081	1.0557	1.1773	0.9979	0.950739	0.356347
	N-acetylneuraminate	1.2976	0.7015	1.0791	0.9522	1.126	1.0156	1.1624	0.9056	1.04446	0.759754
Purine Metabolism	xanthine	0.9007	NA	0.9538	0.9212	1.1346	0.858	0.9851	0.9474	1.06057	0.409141
	xanthosine	1.2048	NA	0.6753	0.751	0.2752	0.2752	0.2752	0.2752	0.313785	0.0678756
	xanthosine 5'-monophosphate (xmp)	1.0459	NA	0.6504	0.6005	0.5316	0.4568	1.0014	0.5511	0.829709	0.521171
	N6-succinyladenosine	0.3421	1.222	1.7961	0.9376	1.1802	0.9673	1.7534	0.8999	1.11704	0.740262
	inosine	0.6252	0.5436	0.7651	0.806	1.0593	0.8481	0.9484	0.9542	1.39056	0.0138985
	inosine 5'-monophosphate (IMP)	0.8848	1.3382	0.8203	0.9177	NA	1.0753	1.0148	1.2212	1.11463	0.436794
	hypoxanthine	0.7993	0.8046	0.8986	0.9961	1.0683	0.941	1.0457	1.0351	1.16907	0.0421664
	guanine	3.0309	NA	3.1682	4.0371	3.83	2.9689	3.6361	3.5404	1.02397	0.835838
	guanosine	NA	0.7313	0.9711	0.8677	1.3282	0.7783	1.0969	0.9531	1.21294	0.240157
	guanosine 5'- monophosphate (5'-GMP)	NA	1.1504	0.9216	0.9015	0.9228	1.0692	1.0938	0.9922	1.02859	0.770863
	allantoin	NA	0.7806	0.8424	0.7188	0.567	0.6963	0.4654	0.62	0.75221	0.0239922
	adenosine 5'-monophosphate (AMP)	NA	0.967	0.7771	0.798	0.958	1.1122	1.1169	1.0223	1.24191	0.0519367
	adenylosuccinate	NA	2.13135	2.4125	1.8502	1.789	1.9479	1.513	2.0626	0.857731	0.207073
	adenine	0.936	0.5549	1.5384	0.71	1.555	0.7754	1.0034	1.0101	1.16169	0.599892
	adenosine	0.8692	0.5344	0.5941	0.6547	0.9607	1.016	1.1058	1.0992	1.57657	0.00761608
	adenosine 2'-monophosphate (2'-AMP)	2.1834	2.0368	2.6055	1.4157	1	0.6196	0.3826	0.8623	0.347574	0.00593706
	adenosine 3'-monophosphate (3'-AMP)	1.1579	1.2283	1.2166	1.1767	1.0131	0.843	1.3335	0.8568	0.846616	0.206258
	adenosine 5'-diphosphate (ADP)	1.4892	1.0751	1.032	0.9505	1.2711	1.2375	1.3071	1.0559	1.07143	0.571746
	2'-deoxyadenosine 5'-monophosphate	NA	1.2307	0.9407	0.8721	1.1508	1.0549	1.0497	1.026	1.05505	0.665953
	2'-deoxyguanosine	0.6622	NA	1.561	0.7396	1.2109	0.6851	0.9112	0.9437	0.949499	0.882897
	2'-deoxyinosine	1.2961	0.767	1.4426	1.0003	0.9918	0.9419	0.8484	1.099	0.861318	0.387748
Pyrimidine Metabolism	uracil	0.4889	1.3317	0.7442	1.0551	0.7972	0.9024	0.7319	1.0212	0.953811	0.840752
	uridine	0.9746	NA	1.1319	1.1444	1.267	0.9969	1.1938	1.0933	1.04994	0.530979
	uridine 3'-monophosphate (3'-UMP)	1.252	0.8991	2.4249	1.5135	1.6255	1.001	1.628	1.0768	0.875491	0.630607
	uridine 5'-diphosphate (UDP)	NA	1.7093	1.2857	1.2113	1.0452	0.9881	1.0293	1.0733	0.737447	0.139169
	uridine 5'-monophosphate (UMP)	1.3673	0.8498	1.1597	1.1095	1.0747	1.1732	1.1184	1.2587	1.03092	0.775993
	uridine-2',3'-cyclic monophosphate	NA	0.59745	0.7476	0.4473	0.3433	0.3433	0.3433	0.3433	0.574609	0.099315
	thymidine 5'-monophosphate	NA	1.3524	0.8569	1.0034	0.9466	1.0482	0.9966	0.9512	0.920394	0.622136
	thymine	0.8022	0.9949	1.1147	0.895	0.6756	0.533	0.2743	0.7758	0.593333	0.0292535
	pseudouridine	NA	1.0566	1.0836	1.0853	0.7935	0.912	1.0016	0.9037	0.839591	0.0244524
	orotate	NA	0.6244	1.0279	0.8338	0.9657	1.0882	1.2373	1.1511	1.34014	0.119317
	orotidine	NA	1.1416	1.2861	0.9971	0.9703	0.9089	1.0093	0.9017	0.830019	0.135562
	N-acetyl-beta-alanine	0.8897	NA	1.0128	1.2013	1.3419	1.2419	1.3018	1.4272	1.28378	0.0657006
	dihydroorotate	NA	0.2668	0.2668	0.2668	0.2668	0.2668	0.2668	0.2668	1	1
	cytidine diphosphate	NA	1.1498	1.1256	1.174	0.9217	0.9576	0.5811	1.1462	0.78418	0.124739
	cytidine 5'-monophosphate (5'-CMP)	1.2291	0.8757	0.9372	1.0611	1.0852	1.2121	1.2252	1.1656	1.14258	0.157891
	cytidine	NA	1.7423	1.19	2.2946	1.7777	2.9845	2.2653	2.9092	1.4258	0.149412
	beta-alanine	NA	1.6317	0.6507	0.8194	0.8745	0.871	0.96	0.8958	0.870777	0.702455
	5-methyluridine (ribothymidine)	1.9171	1.0517	1.5365	1.1512	0.9219	0.6862	0.7409	0.9493	0.583099	0.0525363
	3-aminoisobutyrate	NA	1.2846	0.6487	0.5962	0.8902	0.9087	0.9103	0.9506	1.08514	0.776551
	2'-deoxyuridine	1.4642	0.9601	1.6813	1.2338	1.0826	1.3943	0.7013	0.9914	0.780912	0.214444
Lysophospholipid	1-oleoyl-GPC (18:1)	1.0967	1.0294	0.8559	0.7828	1.0216	0.8641	1.0103	0.9613	1.02457	0.789658
	1-oleoyl-GPE (18:1)	0.9039	0.7468	0.9973	1.0104	1.3576	1.1082	1.3042	1.1595	1.34745	0.00945137
	1-oleoyl-GPG (18:1)*	0.472	NA	0.8443	0.9866	1.0922	1.1616	0.9973	0.9793	1.37774	0.192862
	1-oleoyl-GPI (18:1)*	0.8423	1.0979	0.8911	0.9518	1.1483	1.1935	1.0566	1.6637	1.33808	0.095126
	1-oleoyl-GPS (18:1)	0.6758	0.5869	1.0508	0.8472	0.9166	0.8066	1.0112	0.9821	1.17585	0.280134
	1-palmitoleoyl-GPC (16:1)*	1.1101	0.9213	1.1168	0.9717	1.1828	0.9992	1.0936	1.1036	1.06294	0.338719
	1-palmitoyl-GPC (16:0)	NA	0.9761	0.7727	0.7399	1.057	0.8026	1.0283	0.8684	1.13201	0.313677
	1-palmitoyl-GPE (16:0)	1.3463	0.9482	1.0176	0.9732	1.3615	1.1761	1.306	1.216	1.18069	0.127081
	1-palmitoyl-GPG (16:0)*	0.7068	0.9318	0.7114	0.9612	1.2977	1.3614	1.2546	1.8476	1.73994	0.0134713
	1-palmitoyl-GPI (16:0)	0.8249	1.0128	0.6619	0.7663	1.0271	0.9826	0.9189	1.3814	1.3197	0.0910589
	1-palmitoyl-GPS (16:0)*	0.7632	0.783	0.671	1.1235	0.8588	0.8587	1.1437	NA	1.14196	0.428326
	1-stearoyl-GPC (18:0)	1.9496	1.4176	0.4644	0.4721	0.6532	0.5842	0.6783	0.5895	0.582104	0.308408
	1-stearoyl-GPE (18:0)	1.8359	1.2749	0.7822	0.7841	1.1836	0.939	1.1821	0.9295	0.905305	0.695899
	1-stearoyl-GPI (18:0)	1.2035	0.9926	0.657	0.7151	1.2894	0.7382	0.7708	0.9524	1.05117	0.8074
	1-stearoyl-GPS (18:0)*	1.2155	1.3327	0.6344	0.7126	0.7089	0.7584	0.9045	0.7997	0.814207	0.383483
	1-arachidonoyl-GPE (20:4n6)*	1.5527	1.6215	1.1235	0.9993	1.1433	0.9421	1.0007	1.6808	0.899924	0.499971
	1-arachidonoyl-GPI (20:4)*	1.6445	1.6652	1.0871	1.0058	1.0369	0.9302	0.9648	1.3318	0.789194	0.848244
	1-linoleoyl-GPC (18:2)	1.4025	1.1117	1.2962	0.9511	1.8696	0.4208	0.8811	0.7204	0.817368	0.548864
	1-linoleoyl-GPE (18:2)*	1.0663	1.1697	1.5344	1.3231	1.6379	1.3071	1.3262	1.949	1.2212	0.180877
	1-linoleoyl-GPI (18:2)*	NA	1.8622	1.8773	1.8471	1.6069	1.2945	1.3891	1.9783	0.841585	0.147162
	2-palmitoyl-GPC (16:0)*	NA	0.9372	0.8554	0.7616	0.8635	0.712	0.9396	1.4032	1.15055	0.464874
	2-palmitoleoyl-GPC (16:1)*	0.9427	1.0965	0.9982	1.103	1.096	0.9757	1.1447	1.0234	1.02401	0.662517
	2-stearoyl-GPE (18:0)*	NA	1.1427	0.6259	0.9505	1.1385	0.4745	1.055	1.5447	1.16197	0.606955
Vitamins metabolism	3'-dephosphocoenzyme A	0.6694	NA	1.9201	1.3381	1.5499	1.3723	1.5063	1.276	1.08931	0.778539
	5-methyltetrahydrofolate (5MeTHF)	NA	0.8166	1.6992	2.3862	0.9019	1.2203	0.4651	1.8209	0.674449	0.384485
	adenosine 5'-diphosphoribose (ADP-ribose)	NA	0.5767	0.8536	0.9828	1.4741	1.4035	1.4569	1.134	1.69963	0.0204065
	alpha-tocopherol	NA	0.63475	0.5675	0.702	0.5691	0.65	0.6291	0.7048	1.00551	0.945318
	coenzyme A	0.9025	NA	1.4838	1.4873	1.2813	1.3751	0.8565	1.4094	0.953048	0.808341
	flavin adenine dinucleotide (FAD)	1.0337	0.908	1.0372	1.0207	0.9665	0.9478	0.8939	1.0038	0.953095	0.271409
	gulonate*	1.5167	1.0318	1.0865	1	0.854	0.9456	0.9837	1.0085	0.81808	0.178623
	nicotinamide	1.2218	1.0273	1.2395	1.1879	1.3103	1.0855	1.2287	1.2234	1.03665	0.547563
	nicotinamide adenine dinucleotide (NAD+)	0.8476	0.8582	0.7992	0.8055	0.9225	0.9612	1.0081	0.9623	1.1642	0.00113321
	nicotinamide adenine dinucleotide reduced (NADH)	0.4277	NA	0.6683	0.8262	0.6127	0.9179	1.0522	0.9964	1.39652	0.163025
	nicotinamide ribonucleotide (NMN)	0.6114	NA	1.2111	1.4817	1.0753	0.807	0.9381	0.8527	0.833734	0.553328
	nicotinamide riboside	NA	0.6816	0.8453	1.1454	0.8665	0.6991	1.0585	1.1409	1.05667	0.779092
	pantetheine	0.7316	0.7251	0.5986	0.9517	1.2662	1.2095	1.2046	1.666	1.77795	0.00635695
	pantothenate	NA	0.8343	0.652	0.6681	0.9806	0.9946	1.0794	1.0149	1.41669	0.0242286
	phosphopantetheine	NA	0.9424	0.7336	0.7879	1.1702	0.7908	0.8171	1.075	1.17287	0.266564
	pterin	0.5934	NA	0.7974	0.8986	1.1982	1.2304	1.5058	1.1328	1.66	0.0107397
	pyridoxal	1.2398	1.0899	1.3962	1.2718	1.1761	1.3421	0.781	1.1991	0.900074	0.404062
	pyridoxal phosphate	0.9109	NA	0.5697	0.6546	1.0629	1.0374	0.9913	0.415	1.23171	0.416176
	pyridoxamine	1.3344	0.9824	0.9434	0.9173	0.9535	1.0154	0.9974	0.8848	0.921867	0.473416
	pyridoxate	NA	1.4852	0.8346	0.8723	0.6165	0.7898	0.6986	0.5743	0.629492	0.197856
	retinol (Vitamin A)	1.05	0.3898	0.3898	0.3898	0.3898	0.3898	0.3898	0.3898	0.702532	0.391002
	thiamin (Vitamin B1)	1.0103	0.6664	0.9721	1.1351	1.169	1.5296	0.9624	1.1344	1.26732	0.155967
Xenobiotics metabolism	thioproline	0.8874	0.7661	1.0414	1.0445	0.9916	1.0016	0.9902	0.8578	1.02722	0.750946
	succinimide	0.7584	0.5005	1.1201	1.3073	1.3986	1.1069	1.3607	1.0773	1.34105	0.185872
	stachydrine	1.0553	1.1418	0.6732	0.5081	0.5483	1.1771	0.8406	0.5112	0.910845	0.739803
	sulfate*	NA	0.7904	0.8753	0.9204	NA	1.5832	0.972	1.3365	1.50485	0.128131
	salicylate	0.8671	0.6562	0.7877	0.8652	0.9295	1.0001	1.226	1.2023	1.37205	0.0192501
	S-(3-hydroxypropyl)mercapturic acid (HPMA)	1.0401	1.1354	0.26	0.26	0.4905	0.7165	0.26	0.7385	0.818216	0.666178
	phenol red	NA	0.7427	0.9708	1.0031	0.8139	1.1759	0.786	0.8987	1.01446	0.918115
	penicillin G	NA	1.4902	0.7183	0.8275	0.747	1.2632	0.5675	0.5843	0.781126	0.491804
	p-cresol sulfate	NA	1.152	0.6601	0.6294	0.5123	0.6828	0.5571	0.5933	0.72051	0.309941
	O-sulfo-L-tyrosine	1.3359	NA	0.7345	0.6734	0.6339	0.6694	1.0001	0.6592	0.809808	0.507863
	o-cresol sulfate	NA	0.8222	0.7252	0.8409	0.8579	0.8043	0.7043	0.8266	1.00273	0.966354
	homostachydrine*	1.1338	0.9983	0.7216	0.6289	0.2832	0.2832	0.2832	0.2832	0.325274	0.0154631
	hippurate	NA	0.6154	0.603	0.6278	0.4669	0.6572	0.4737	0.5079	0.855419	0.138418
	HEPES	1.8044	2.1355	1.162	1.0945	0.7201	0.7164	0.7923	0.717	0.475405	0.0482684
	guaiacol sulfate	1.8571	0.879	0.9489	0.8237	1.1551	0.9431	1.0349	0.9826	0.912835	0.717855
	gluconate	1.4379	1.1137	1.093	1.0658	0.5627	0.9691	0.6135	0.4452	0.549953	0.011064
	erythritol	NA	0.162	0.162	0.162	0.162	0.162	0.162	0.162	1	1
	beta-guanidinopropanoate	0.8486	0.6309	0.5803	0.644	0.4841	1.3413	0.856433	0.7439	1.26701	0.398434
	benzoate	1.3491	0.8786	NA	0.8336	0.732	1.0996	1.0721	0.7494	0.894987	0.61246
	benzoylcarnitine*	0.2978	0.2978	0.9166	0.7549	1.0283	0.7612	1.1878	1.0724	1.78629	0.0611882
	2-aminophenol sulfate	NA	0.6258	0.7693	0.615	0.7307	0.786	0.7098	0.7357	1.10524	0.289522
